# Supplementary material for: A Role for Gene Duplication and Natural Variation of Gene Expression in the Evolution of Metabolism
Source: PLoS One. 2008 Mar 19;3(3):e1838. doi: 10.1371/journal.pone.0001838 (PMC2263126; doi:10.1371/journal.pone.0001838)
Supplement: Table S1 — Per Gene Statistical Values. The per gene statistical values are presented for all genes measured on the Affymetrix ATH1 microarray for Arabidopsis for the four datasets utilized in this manuscript. The datasets derived from experiments querying gene expression in response to abiotic stress variation, developmental variation, and two independent analysis of variation between different natural Arabidopsis accessions. Probe Set represents the probe set on the ATH1 microarray, AGI is the Arabidopsis gene code, Duplication represents the predicted gene duplication status [5]. Mean = mean transcript accumulation (μ) in log2 across the samples within the dataset, Var = per transcript variance (σ2) across the samples within the dataset, VMR = σ2/μ for each transcript, and CV = σ/μ for each transcript. For the dataset Accession I, R2 is the pearson correlation coefficient for transcript accumulation between the different accessions using all of the genes within a pathway. (8.64 MB XLS) [file pone.0001838.s001.xls]

## Sheet: VarMean Values
Supplemental Table 1. Per Gene Statistical Values
		Dataset		Accession II					Accession I					AtGE Developmental					AtGE Abiotic
Probe Set	AGI	Duplication		Mean	Var	VMR	CV		Mean	Var	VMR	CV		Mean	Var	VMR	CV		Mean	Var	VMR	CV
261585_at	At1g01010	Unique		2.78976	0.00343419	0.00123397	0.0210061		6.73228	0.0374784	0.00556698	0.028756		4.6275	1.18651	0.256404	0.23539		4.78295	0.338464	0.0707647	0.121635
261568_at	At1g01030	Unique		4.43626	0.0422145	0.00961272	0.0463142		4.92062	0.247365	0.0502712	0.101076		4.84956	0.639241	0.131814	0.164866		5.5433	0.30262	0.054592	0.0992386
261584_at	At1g01040	Unique		6.22038	0.0119277	0.00193588	0.0175574		7.5516	0.156987	0.0207886	0.0524678		7.44101	0.262607	0.0352918	0.0688686		8.16801	0.08847	0.0108313	0.0364151
261579_at	At1g01050	Duplicate		9.78915	0.0172087	0.00176805	0.0134007		11.4578	0.00341201	0.00029779	0.00509806		10.0754	0.221156	0.02195	0.0466752		10.635	0.0470782	0.0044267	0.0204019
261569_at	At1g01060	Unique		8.96635	1.06475	0.126606	0.115082		6.90278	0.045113	0.00653548	0.0307699		8.9591	1.16839	0.130414	0.120651		8.94715	5.98376	0.66879	0.273403
261576_at	At1g01070	Duplicate		2.14552	0.00290647	0.00136347	0.0251276		8.1141	0.224657	0.0276872	0.0584143		6.0025	3.67561	0.612347	0.319398		6.18235	0.836466	0.135299	0.147935
261577_at	At1g01080	Unique		9.91602	0.0215299	0.00215818	0.0147974		10.9811	0.0521127	0.00474568	0.0207887		7.87905	3.28445	0.416859	0.230016		9.44079	0.281928	0.0298628	0.056242
261583_at	At1g01090	Unique		11.537	0.0235908	0.00203421	0.0133131		12.229	0.0284595	0.00232722	0.0137951		11.1876	0.44527	0.0398003	0.0596451		11.8274	0.0503555	0.00425753	0.0189729
261578_at	At1g01100	Duplicate		12.9673	0.00822579	0.000632974	0.00699423		13.2884	0.033057	0.00248766	0.0136823		13.0879	0.73563	0.0562069	0.0655329		13.3349	0.0918515	0.00688807	0.0227276
261580_at	At1g01110	Unique		2.09699	0.0011582	0.000556403	0.0162291		3.10736	0.04827	0.0155341	0.0707045		4.1178	1.02629	0.249231	0.246019		3.80167	0.0886572	0.0233206	0.0783218
261570_at	At1g01120	Duplicate		10.082	0.0784112	0.00805352	0.0277743		9.85812	0.0903068	0.00916065	0.0304836		9.5738	2.19089	0.228842	0.154606		10.5058	0.88232	0.0839842	0.0894097
261575_at	At1g01130	Unique		3.30957	0.00753691	0.00231416	0.0262316		5.08719	0.495019	0.097307	0.138303		6.11796	0.616006	0.100688	0.128288		5.19535	0.287227	0.0552855	0.103157
261581_at	At1g01140	Duplicate		8.87004	0.0949261	0.010721	0.034735		10.1486	0.134086	0.0132122	0.0360815		9.23956	4.43771	0.480295	0.227996		9.8405	0.553542	0.0562514	0.0756063
261571_at	At1g01150	Unique		2.84585	0.00271948	0.000967207	0.0183244		4.56689	0.0854022	0.0187003	0.0639903		3.04197	0.146093	0.0480259	0.125649		3.29262	0.0652444	0.0198154	0.0775765
261582_at	At1g01160	Unique		6.7105	0.0114475	0.00168924	0.0159441		9.39303	0.00930389	0.00099051	0.010269		8.07457	0.391305	0.0484614	0.0774709		8.36371	0.108249	0.0129427	0.039338
261572_at	At1g01170	Duplicate		10.5817	0.0255509	0.00241371	0.015106		12.0154	0.0883556	0.00735352	0.0247388		10.5033	1.75228	0.166832	0.126031		11.6405	0.113459	0.00974689	0.0289365
261573_at	At1g01180	Unique		2.27138	0.00328802	0.00144778	0.0252451		5.8918	0.0867037	0.014716	0.0499771		3.36998	0.084772	0.0251551	0.0863971		3.9262	0.0362526	0.0092335	0.048495
261574_at	At1g01190	Duplicate		6.82313	0.198594	0.0292592	0.065313		6.14371	0.285019	0.046392	0.0868973		5.06688	3.28651	0.648627	0.357789		4.66666	0.107602	0.0230575	0.0702915
261042_at	At1g01200	Unique		1.81577	0.000243585	0.000134596	0.00859539		5.49759	0.275784	0.0501646	0.095524		3.4614	0.470146	0.135825	0.198091		3.14291	0.0217464	0.00691919	0.0469204
261043_at	At1g01220	Unique		6.95415	0.15183	0.0216854	0.0560319		8.89061	0.066916	0.00752659	0.029096		7.24845	0.689421	0.0951129	0.11455		8.18752	0.159451	0.0194749	0.0487709
261025_at	At1g01225	Duplicate		2.94534	0.0619354	0.0219172	0.0844957		7.75383	0.0167557	0.00216095	0.0166942		5.12518	1.64771	0.321493	0.250456		5.55518	0.135111	0.0243216	0.0661679
261057_at	At1g01230	Duplicate		6.5693	0.0457145	0.00696072	0.0325468		10.8278	0.00181296	0.000167436	0.00393238		8.27245	0.363301	0.0439169	0.0728616		8.41384	0.109321	0.0129929	0.0392967
261026_at	At1g01240	Unique		4.12622	0.0591272	0.0142874	0.0589306		9.74547	0.078003	0.00800403	0.0286585		8.33482	1.51652	0.18195	0.14775		8.77048	1.0612	0.120997	0.117456
261059_at	At1g01250	Unique		1.81873	0.00340631	0.00186357	0.0320903		7.5408	0.155374	0.0206044	0.0522723		4.86649	4.7282	0.971584	0.44682		4.23137	1.66533	0.393568	0.304979
261050_at	At1g01260	Unique		5.3264	0.0125891	0.00237284	0.0210651		7.9958	0.00812766	0.00101649	0.0112751		6.95145	0.136254	0.0196008	0.0531006		7.31759	0.144334	0.0197243	0.0519179
261051_at	At1g01280	Unique		2.40301	0.00106462	0.000445487	0.0135782		2.1357	0.0655041	0.030671	0.119838		2.7239	2.41229	0.885604	0.570197		2.5616	0.161648	0.0631044	0.156955
261044_at	At1g01290	Unique		6.06848	0.0574196	0.00938811	0.0394867		8.01519	0.144707	0.018054	0.0474603		7.28949	0.100701	0.0138145	0.0435331		8.23539	0.0946373	0.0114915	0.0373548
261055_at	At1g01300	Unique		8.3889	0.0955228	0.0113852	0.0368425		10.6328	0.187661	0.0176492	0.0407416		8.98624	2.13768	0.237883	0.162702		8.99334	0.49136	0.054636	0.0779434
261045_at	At1g01310	Unique		2.01127	0.000485009	0.000242532	0.0109498		2.14163	0.0343089	0.01602	0.0864884		3.00391	4.53944	1.51117	0.709273		1.94592	0.0126648	0.00650836	0.0578326
261053_at	At1g01320	Unique		10.7817	0.0243822	0.00225554	0.0144827		10.971	0.166073	0.0151374	0.0371451		9.11179	3.26567	0.358401	0.198327		11.4769	0.182106	0.0158672	0.0371824
261054_at	At1g01330			7.36634	0.116261	0.0158257	0.0462876		8.0557	0.173999	0.0215994	0.0517809		5.32813	2.31943	0.435318	0.285835		8.81971	0.396839	0.0449945	0.0714254
261027_at	At1g01340	Duplicate		2.78836	0.0342166	0.0121799	0.0663389		7.77564	0.126721	0.0162972	0.0457813		5.77011	1.86049	0.322435	0.23639		5.74782	0.869898	0.151344	0.162267
261056_at	At1g01360	Unique		5.77997	0.0633848	0.0110169	0.0435579		8.94031	0.0580125	0.00648886	0.0269406		8.01692	0.572758	0.0714437	0.0944013		8.45627	0.142828	0.0168902	0.0446918
261058_at	At1g01370	Unique		3.09818	0.0256506	0.00814724	0.0516942		6.8194	0.109537	0.0160625	0.0485326		4.4047	1.46716	0.333091	0.274994		4.66897	0.187643	0.0401894	0.0927781
257490_x_at	At1g01380	Duplicate		3.95154	0.00720778	0.00184755	0.0214849		4.68663	0.079058	0.0168688	0.0599946		5.27516	0.381141	0.072252	0.117033		5.04095	0.0667661	0.0132447	0.0512585
261046_at	At1g01390	Duplicate		5.86449	0.684654	0.107158	0.141093		6.12049	0.177348	0.0289761	0.0688061		3.86879	1.20673	0.311915	0.283943		5.8414	1.04977	0.179712	0.1754
261047_at	At1g01410	Unique		2.59004	0.0014937	0.000582557	0.014922		4.50984	0.162568	0.0360475	0.089404		2.72075	0.105675	0.0388405	0.119481		2.88337	0.027584	0.00956657	0.0576007
261048_at	At1g01420	Duplicate		4.01163	0.414005	0.0997586	0.160392		7.87361	0.294357	0.0373853	0.068907		3.74304	0.740415	0.197811	0.229886		5.94246	0.762137	0.128253	0.14691
261049_at	At1g01430	Duplicate		8.67701	0.171301	0.0195532	0.0476991		9.49015	0.0318613	0.00335731	0.0188087		8.06706	1.24863	0.154781	0.138517		9.40376	0.392665	0.0417562	0.0666361
261052_at	At1g01440	Duplicate		4.84936	0.0250177	0.00525273	0.0326166		7.79713	0.0520905	0.00668073	0.0292715		6.71435	0.246256	0.0366761	0.0739077		7.6031	0.0721199	0.00948559	0.0353213
259435_at	At1g01450	Unique		2.09388	0.000536324	0.00025848	0.0110602		5.21094	0.0158072	0.00303347	0.0241275		2.17367	0.0288018	0.0132503	0.0780759		2.22406	0.0093609	0.00420892	0.0435023
259425_at	At1g01460	Duplicate		1.91783	0.0005018	0.000263254	0.0116804		2.82919	0.0963296	0.0340484	0.109703		3.21528	3.80335	1.1829	0.606547		2.54559	0.00859121	0.00337494	0.0364115
259426_at	At1g01470	Duplicate		7.33003	0.10588	0.0140092	0.0443916		13.1609	0.0293874	0.00223294	0.0130255		9.65649	4.81301	0.498422	0.22719		10.7371	2.22069	0.206824	0.138789
259439_at	At1g01480	Duplicate		2.37141	0.000252773	0.000107171	0.00670437		8.18599	0.150097	0.0183359	0.0473277		4.72572	2.72741	0.577141	0.349468		4.40978	1.79319	0.40664	0.303666
259434_at	At1g01490	Unique		9.42993	0.0901595	0.0096078	0.0318418		11.0585	0.0359911	0.0032546	0.0171554		10.5993	0.618128	0.0583178	0.0741757		11.6635	0.456766	0.0391621	0.0579454
259436_at	At1g01500	Unique		6.90091	0.0344754	0.00493894	0.026906		10.2364	0.0329701	0.00322086	0.0177383		8.06807	0.816468	0.101197	0.111995		8.63696	0.420287	0.0486615	0.0750607
259438_at	At1g01510	Unique		7.12603	0.0314764	0.00440766	0.0248969		8.84076	0.130702	0.014784	0.0408933		8.47862	0.495775	0.0584736	0.0830457		9.07058	0.0413325	0.00455676	0.0224136
259432_at	At1g01520	Duplicate		3.38889	0.0250626	0.00797495	0.0467149		4.0756	0.0971247	0.0238308	0.0764669		3.61819	0.547549	0.151332	0.204513		5.8704	3.72816	0.635078	0.328912
259427_at	At1g01530	Unique		2.62566	0.00125065	0.000480147	0.0134688		5.12023	0.125124	0.0244373	0.0690847		2.6022	0.0768264	0.0295237	0.106516		3.22746	0.0244588	0.00757834	0.048457
259437_at	At1g01540	Duplicate		8.52458	0.0441268	0.00524908	0.0246421		9.36516	0.0258353	0.00275866	0.0171629		8.78789	0.559702	0.0636902	0.0851322		9.67713	0.156606	0.0161831	0.0408939
259440_at	At1g01550	Duplicate		9.06654	0.0251826	0.00279575	0.0175029		12.0392	0.00495629	0.000411679	0.00584763		10.5006	0.464729	0.0442574	0.0649211		11.0218	0.102561	0.00930532	0.0290563
259428_at	At1g01560	Unique		2.22148	0.0391096	0.0172824	0.0890225		9.7706	0.0610169	0.00624495	0.0252816		6.31783	3.02	0.478013	0.275065		6.43774	1.77831	0.276232	0.207143
259433_at	At1g01570	Unique		2.44027	0.006899	0.00283073	0.0340372		5.94339	0.0491068	0.00826243	0.0372852		4.68747	0.589904	0.125847	0.163852		5.24833	0.283978	0.0541082	0.101536
259429_at	At1g01600	Duplicate		2.22647	0.0763746	0.033928	0.124125		6.46724	0.316511	0.0489407	0.0869913		5.87177	4.43215	0.754825	0.358541		6.74584	0.136966	0.0203038	0.0548618
259430_at	At1g01610	Duplicate		8.90174	0.0377118	0.00429109	0.0218154		9.53964	0.170323	0.0178542	0.0432618		8.77708	1.41469	0.16118	0.135513		9.24148	0.145317	0.0157244	0.0412493
259431_at	At1g01620	Duplicate		11.5671	0.103782	0.0090672	0.0278507		12.1139	0.0654272	0.005401	0.0211152		11.5042	2.11176	0.183565	0.126318		12.5128	0.302063	0.0241404	0.0439233
261563_at	At1g01630	Unique		8.96994	0.0215585	0.00241919	0.0163689		10.6413	0.0125483	0.00117921	0.0105269		8.70282	1.5516	0.178287	0.14313		9.39789	0.112774	0.0119999	0.0357333
261586_at	At1g01640	Unique		2.15784	0.023149	0.0106944	0.0705094		7.73911	0.155342	0.0200723	0.0509276		6.01371	3.21329	0.534328	0.29808		4.19615	0.173746	0.0414059	0.0993358
257484_at	At1g01650	Duplicate		6.39135	0.0199742	0.00309651	0.0221127		10.4817	0.0170596	0.00162756	0.012461		8.76435	0.451441	0.0515088	0.0766621		9.07053	0.315008	0.0347287	0.0618768
261587_at	At1g01660	Unique		2.21559	0.000816323	0.000370321	0.0128956		6.27901	0.0332082	0.00528876	0.0290223		2.67454	0.0860201	0.0321626	0.109661		2.51363	0.0134768	0.0053615	0.0461841
261588_at	At1g01670	Unique		2.18506	0.00671586	0.00307333	0.0375049		7.74699	0.0762924	0.00984801	0.035654		4.367	0.228308	0.0522803	0.109415		4.99678	0.130459	0.0261085	0.0722847
261589_at	At1g01690	Unique		2.21624	0.00140977	0.000646061	0.0169417		6.19309	0.0121463	0.00196127	0.0177957		3.44248	0.138111	0.0401197	0.107955		3.56188	0.0249761	0.00701206	0.0443694
261590_at	At1g01700	Duplicate		3.08705	0.00445123	0.00145549	0.0216121		4.42178	0.410486	0.0928327	0.144894		3.69443	0.146436	0.0396371	0.10358		3.91894	0.0675976	0.0172489	0.0663432
261560_at	At1g01710	Unique		6.14109	0.046586	0.0074996	0.0351465		8.78796	0.00694729	0.000790547	0.00948462		8.13429	0.163685	0.0201228	0.0497375		8.69882	0.081253	0.00934069	0.0327687
261564_at	At1g01720	Unique		5.53651	0.325284	0.0576682	0.103014		9.12326	0.0617364	0.00676693	0.0272346		9.04545	2.13609	0.23615	0.161577		9.12001	1.2726	0.13954	0.123695
261535_at	At1g01725	Unique		3.78235	0.0429497	0.0111884	0.0547921		8.36094	0.258845	0.0309588	0.0608505		6.82613	0.877622	0.128568	0.13724		7.06091	0.167779	0.0237617	0.0580107
261561_at	At1g01730	Unique		5.50389	0.0294189	0.00524498	0.0311633		9.42664	0.0129349	0.00137216	0.0120649		7.94593	0.637467	0.0802256	0.100481		7.98906	0.240669	0.0301248	0.0614064
261591_at	At1g01740	Duplicate		3.78209	0.0290835	0.0076556	0.0450912		7.8652	0.0426666	0.00542473	0.0262624		5.29724	0.222591	0.0420203	0.0890646		6.72636	0.0795384	0.0118249	0.0419284
261562_at	At1g01750	Duplicate		2.65588	0.0785128	0.0298354	0.105502		3.9281	0.186863	0.0475707	0.110047		3.98712	4.05356	1.01667	0.504963		3.75591	0.024343	0.00648125	0.0415405
261592_at	At1g01760	Unique		2.09216	0.00948703	0.00458436	0.0465555		3.22257	0.0175824	0.00545603	0.0411469		3.66101	0.169334	0.0462535	0.112401		5.06027	0.0921585	0.0182122	0.0599922
261558_at	At1g01770	Unique		5.62251	0.201524	0.0354504	0.0798424		8.07476	0.248611	0.0307887	0.0617492		6.94973	0.679888	0.0978295	0.118645		7.45129	0.524013	0.0703252	0.0971494
261559_at	At1g01780	Duplicate		5.02476	0.0230199	0.00455118	0.0301951		6.84365	0.0906698	0.0132487	0.043999		7.0885	2.20386	0.310906	0.209429		6.91031	0.135923	0.0196696	0.0533518
261536_at	At1g01790	Duplicate		10.2407	0.0758875	0.00742281	0.0269003		10.563	0.104617	0.0099041	0.0306206		8.81607	2.42367	0.274915	0.176588		11.2083	0.175333	0.0156432	0.0373588
261537_at	At1g01800	Duplicate		9.27046	0.0651468	0.00698311	0.0275325		11.174	0.00866487	0.00077545	0.00833054		9.62306	0.585402	0.0608333	0.0795086		10.5744	0.0855585	0.00809106	0.0276614
261534_at	At1g01820	Duplicate		7.65452	0.0473264	0.00613992	0.0284206		10.7496	0.0717838	0.00667778	0.0249241		9.2595	0.348658	0.037654	0.0637693		9.03468	0.297195	0.0328949	0.0603403
261538_at	At1g01830	Duplicate		2.50204	0.0146649	0.00580001	0.0484001		7.14099	0.0733035	0.0102652	0.0379144		5.60417	1.20938	0.2158	0.196232		6.05874	0.734725	0.121267	0.141475
261539_at	At1g01840	Unique		4.00229	0.0462201	0.0116158	0.0537164		6.54106	0.0637317	0.00974333	0.0385949		5.01015	0.365307	0.0729134	0.120636		6.0528	0.118405	0.0195621	0.0568498
261652_at	At1g01860	Unique		6.5898	0.0818978	0.0122837	0.0434274		8.65847	0.0385359	0.00445066	0.0226721		6.39134	0.460804	0.0720982	0.10621		7.0538	0.104664	0.014838	0.0458645
261653_at	At1g01900	Unique		5.30182	0.0672597	0.0126448	0.0489161		6.45467	0.294557	0.0456347	0.0840835		6.66513	3.07932	0.462004	0.263281		7.44333	0.187687	0.0252155	0.0582037
261627_at	At1g01910	Unique		8.65205	0.0364862	0.00420253	0.0220773		10.3948	0.0118327	0.00113833	0.0104647		8.74923	0.0769877	0.00879937	0.0317133		8.95942	0.0433134	0.0048344	0.023229
261654_at	At1g01920	Unique		2.30669	0.00705944	0.00299438	0.0364247		7.18902	0.00892433	0.00124138	0.0131407		4.46812	0.425743	0.0952845	0.146032		4.0659	0.0857798	0.0210974	0.0720337
261625_at	At1g01930	Unique		6.61354	0.00827831	0.0012514	0.0137574		7.80628	0.185865	0.0238097	0.0552274		7.5484	0.102369	0.0135617	0.0423866		8.43823	0.0695281	0.00823966	0.0312485
261655_at	At1g01940	Duplicate		6.59406	0.0631729	0.0095153	0.0381165		9.21744	0.044122	0.00478679	0.0227886		7.41458	0.376322	0.0507543	0.0827358		7.86907	0.747886	0.0950413	0.109899
261656_at	At1g01950	Duplicate		5.1971	0.033827	0.0064946	0.0353892		7.59679	0.0316165	0.00416182	0.023406		7.2798	0.302173	0.0415085	0.0755107		7.66573	0.23141	0.0301876	0.0627534
261621_at	At1g01960	Duplicate		8.15803	0.0230342	0.00280896	0.0186038		10.0383	0.0359646	0.00358275	0.018892		9.10741	0.222622	0.024444	0.0518071		9.25773	0.0670041	0.00723764	0.0279606
261622_at	At1g01970	Unique		8.63072	0.0672586	0.0077049	0.0300488		9.96285	0.0604844	0.006071	0.0246853		8.18862	1.08928	0.133023	0.127455		9.62677	0.14838	0.0154133	0.0400135
261623_at	At1g01980	Duplicate		2.15791	0.000713154	0.000332804	0.0123754		2.54947	0.0692454	0.0271607	0.103216		3.85641	7.32072	1.89833	0.701607		2.59514	0.0128664	0.0049579	0.0437088
261626_at	At1g01990	Unique		5.64411	0.105467	0.0184077	0.0575392		8.63441	0.0311049	0.00360244	0.0204259		7.11886	0.295446	0.0415019	0.0763535		8.12846	0.0494879	0.00608823	0.0273679
261624_at	At1g02000	Duplicate		4.50575	0.116166	0.0257058	0.0756434		7.52283	0.034665	0.00460797	0.0247494		7.19771	1.59897	0.22215	0.175681		7.35103	0.0872217	0.0118652	0.0401758
264169_at	At1g02020	Unique		5.8062	0.203274	0.0351648	0.0776514		7.5789	0.359822	0.0474768	0.0791476		7.0511	0.26809	0.038021	0.0734317		7.50554	0.0689617	0.00918811	0.0349883
264175_at	At1g02050	Duplicate		2.93506	0.0119747	0.00417817	0.0372833		5.12682	0.821856	0.160305	0.176828		5.12041	1.83079	0.357548	0.26425		6.23033	0.151461	0.0243103	0.0624654
264167_at	At1g02060	Unique		2.91138	0.639182	0.206039	0.274608		6.01377	0.55618	0.0924844	0.124011		3.1745	0.191698	0.0603869	0.137922		4.22415	0.0598705	0.0141734	0.0579251
264151_at	At1g02070	Unique		2.64241	0.00112453	0.0004294	0.0126907		5.69497	0.050132	0.00880284	0.0393157		4.5268	2.52527	0.55785	0.351045		2.98729	0.0154718	0.0051792	0.0416383
264168_at	At1g02080	Unique		8.37191	0.0079792	0.000945513	0.0106698		9.74167	0.0431702	0.0044315	0.0213284		9.50406	0.149484	0.0157284	0.0406806		9.94481	0.0414218	0.00416517	0.0204653
264150_at	At1g02090	Unique		6.60092	0.163391	0.0253419	0.0612364		8.94281	0.012549	0.00140325	0.0125265		7.73046	0.254645	0.0329404	0.0652773		7.86734	0.272518	0.0346391	0.0663544
264171_at	At1g02100	Unique		6.61993	0.00777494	0.0011678	0.0133197		8.99151	0.0249797	0.00277814	0.0175776		7.84874	0.243175	0.0309827	0.0628289		8.21767	0.0574884	0.00699571	0.0291771
264176_at	At1g02110	Duplicate		5.5253	0.0343685	0.00623358	0.0335524		7.11615	0.0177984	0.00250113	0.0187476		6.0845	1.05302	0.173066	0.168653		7.38707	0.168677	0.022834	0.0555975
264172_at	At1g02120	Unique		8.18755	0.00924782	0.00112825	0.0117453		10.0564	0.0268789	0.00267282	0.0163029		9.42803	0.254169	0.0269589	0.0534738		9.82832	0.0531534	0.00540819	0.0234577
264122_at	At1g02130	Duplicate		7.50957	0.0133643	0.00177219	0.0153943		9.30902	0.0246216	0.00264492	0.016856		8.61114	0.117893	0.0136908	0.0398735		9.0812	0.0480116	0.00528692	0.0241285
264152_at	At1g02140	Unique		10.3924	0.016206	0.00155991	0.0122496		12.0841	0.0129457	0.0010713	0.00941563		10.5177	0.134095	0.0127495	0.0348165		10.9592	0.0680728	0.00621148	0.0238072
264177_at	At1g02150	Unique		10.435	0.028447	0.00271628	0.0161631		11.3296	0.0462492	0.00408216	0.0189818		9.45053	1.44122	0.152502	0.127031		10.8211	0.137818	0.012736	0.0343068
264173_at	At1g02160	Unique		7.93866	0.0407754	0.00511854	0.0254362		10.6738	0.011357	0.00106401	0.00998422		9.58512	0.319702	0.033354	0.0589895		9.60982	0.0823835	0.00857284	0.0298679
264178_at	At1g02170	Duplicate		7.38299	0.050963	0.00696027	0.030577		10.1878	0.0380511	0.00373497	0.0191471		8.87704	0.30318	0.0341533	0.0620272		8.66947	0.154133	0.0177788	0.045285
264179_at	At1g02180	Unique		4.51038	0.099814	0.0216629	0.0700459		7.90316	0.0865253	0.0109482	0.0372195		6.22431	0.722228	0.116033	0.136536		5.74515	0.0748052	0.0130206	0.0476063
264180_at	At1g02190	Tandem Duplicate		2.99265	0.00105021	0.000354647	0.0108289		5.30214	0.594615	0.112146	0.145434		5.03254	5.62685	1.11809	0.471352		3.07333	0.0867196	0.0282168	0.0958185
264147_at	At1g02200			3.39787	1.31262	0.352048	0.337182		9.88543	0.645291	0.0652769	0.081261		6.75899	9.43083	1.3953	0.454353		7.52576	1.74844	0.232327	0.175701
264146_at	At1g02205	Tandem Duplicate		5.09527	1.61565	0.298943	0.249463		10.762	0.420109	0.0390361	0.0602263		8.09895	10.0042	1.23525	0.390538		8.64943	1.29209	0.149384	0.131419
264148_at	At1g02220	Duplicate		3.02922	0.00555704	0.0018553	0.0246088		6.49955	0.729836	0.11229	0.13144		5.46933	2.13613	0.390565	0.267227		5.93751	0.650735	0.109597	0.135862
264174_s_at	At1g02230	Unique		2.29125	0.000465651	0.000204669	0.00941799		5.55773	0.0167094	0.00300651	0.0232586		2.96746	0.0995501	0.0335472	0.106325		4.83656	0.0311961	0.00645005	0.0365185
264149_at	At1g02250	Unique		2.54813	0.00125439	0.000502946	0.0138994		5.57193	0.0532522	0.00955723	0.0414155		2.93636	0.0490501	0.0167044	0.0754241		3.11087	0.033796	0.0108638	0.0590949
264170_at	At1g02260	Unique		3.89314	0.10163	0.0252875	0.0818862		8.88962	0.150514	0.0169314	0.043642		6.9329	0.236143	0.0340612	0.0700927		7.00518	0.337379	0.0481614	0.0829163
264123_at	At1g02270	Unique		6.11308	0.0310737	0.00490981	0.0288361		10.3585	0.0790596	0.00763232	0.0271443		7.77601	0.336021	0.0432125	0.0745464		8.01957	0.545644	0.068039	0.0921093
264121_at	At1g02280	Duplicate		10.0663	0.0195653	0.00195015	0.0138955		11.0919	0.0214551	0.00193431	0.0132057		9.0325	1.35165	0.149643	0.128714		10.0133	0.191413	0.0191159	0.0436926
259441_at	At1g02300	Tandem Duplicate		6.86385	1.87433	0.287487	0.19946		9.8432	4.5619	0.463457	0.216988		7.09175	1.0142	0.143011	0.142006		8.65192	1.0273	0.118737	0.117148
259416_at	At1g02305	Tandem Duplicate		8.57125	0.0667163	0.00782734	0.030135		11.49	0.0208056	0.00181076	0.0125537		10.5659	0.676301	0.0640079	0.077833		10.6829	0.306572	0.0286975	0.0518295
259442_at	At1g02310	Unique		2.28931	0.00214959	0.000941229	0.0202523		7.55895	0.426539	0.0564284	0.0864009		5.66781	3.41556	0.602624	0.326073		5.46151	1.30118	0.238245	0.20886
259413_at	At1g02320	Unique		3.02652	0.00430606	0.0014494	0.0216819		2.45972	0.0949111	0.0385861	0.125248		3.7315	0.189661	0.0508271	0.116709		3.5598	0.0381139	0.0107068	0.0548424
259415_at	At1g02330	Unique		6.04815	0.310359	0.0497377	0.0921105		8.19034	0.223876	0.0273341	0.0577699		8.13752	0.157484	0.0193528	0.048767		8.66806	0.131802	0.0152054	0.041883
259417_at	At1g02340	Unique		2.68173	0.000611916	0.000229649	0.00922423		6.01642	0.22371	0.0371833	0.0786149		5.2327	3.18379	0.608441	0.340994		5.10715	1.24629	0.244027	0.21859
259443_at	At1g02360	Unique		2.7007	0.0026241	0.000993632	0.0189676		7.48805	0.0325118	0.00434182	0.0240797		5.13807	4.92664	0.958851	0.431992		5.37042	1.12076	0.208691	0.197128
259444_at	At1g02370	Duplicate		4.70725	0.0501166	0.0105125	0.0475581		8.04659	0.021175	0.00263155	0.0180842		5.88028	0.933901	0.158819	0.164344		5.81304	0.341441	0.0587371	0.10052
259418_at	At1g02390	Duplicate		1.90452	0.00344002	0.00184731	0.030796		8.28415	0.136351	0.0164592	0.0445739		4.14199	3.76724	0.909523	0.4686		4.5432	1.74835	0.384827	0.29104
259445_at	At1g02400	Unique		2.19907	0.000338798	0.000158308	0.00837013		8.01017	0.238818	0.0298144	0.0610088		5.33484	3.14533	0.589582	0.332439		5.50073	3.7764	0.686528	0.35328
259446_at	At1g02410	Unique		7.1872	0.0391138	0.00543206	0.0275173		10.1609	0.0225334	0.00221766	0.0147735		8.44226	0.0605965	0.00717775	0.0291585		8.80048	0.0296548	0.00336968	0.0195678
259414_at	At1g02420	Unique		4.29871	0.0104542	0.0024353	0.0237852		6.59408	0.0367861	0.00557865	0.0290862		5.66445	0.100322	0.0177108	0.0559166		6.5124	0.0441215	0.006775	0.0322541
259447_s_at	At1g02430	Unique		2.86643	0.00584582	0.00209826	0.0266736		6.05561	0.0440709	0.00727769	0.0346671		5.15596	0.420233	0.0815043	0.125729		5.48921	0.0468148	0.00852851	0.0394168
260904_at	At1g02450	Unique		3.02434	0.00766156	0.00255019	0.028942		10.3295	0.252872	0.0244807	0.0486825		6.18198	2.35396	0.380777	0.248183		5.72381	1.05742	0.18474	0.179654
260903_at	At1g02460	Unique		3.81464	0.00429907	0.00114064	0.0171883		7.64842	0.0767114	0.0100297	0.0362125		5.51527	0.120457	0.0218405	0.0629286		4.84283	0.0711428	0.0146903	0.0550765
260933_at	At1g02470	Unique		2.10544	0.00229094	0.00108799	0.0227334		8.99176	0.100583	0.0111862	0.0352711		4.94001	4.68845	0.949076	0.438315		5.31158	1.17563	0.221334	0.204133
260916_at	At1g02475	Unique		9.23805	0.0243273	0.00263118	0.0168836		11.7316	0.00895528	0.000763349	0.00806647		8.67559	2.4707	0.284788	0.18118		10.5705	0.0840616	0.00795244	0.0274285
260911_at	At1g02490	Unique		3.08237	0.00279119	0.000915176	0.01714		2.35391	0.252006	0.107058	0.213263		3.8555	0.137381	0.0356325	0.0961352		4.43646	0.0193158	0.00435388	0.0313271
260913_at	At1g02500	Duplicate		10.6143	0.141648	0.0131674	0.035458		12.1261	0.132633	0.0109378	0.0300334		11.8855	0.491408	0.0413451	0.0589798		12.1917	0.0659237	0.00540726	0.0210599
260932_s_at	At1g02530	Tandem Duplicate		2.84182	0.00122579	0.000436386	0.01232		8.29696	0.287398	0.0346389	0.0646134		3.99262	2.35146	0.588951	0.38407		3.56753	0.122284	0.0342771	0.0980207
260906_at	At1g02540	Unique		2.96035	0.00261275	0.000893281	0.0172666		3.50686	0.388117	0.110673	0.177649		3.69195	0.128506	0.0348071	0.097097		4.11235	0.0694136	0.0168793	0.0640667
260931_at	At1g02550	Unique		2.16504	0.00105086	0.00048637	0.0149729		4.95189	0.15312	0.0309216	0.0790215		2.44467	0.0631748	0.0258418	0.102814		3.53655	0.0163976	0.00463662	0.0362085
260912_at	At1g02560	Unique		11.8842	0.00610824	0.000514551	0.00657639		12.6379	0.00918038	0.000726417	0.00758151		10.9482	1.05404	0.0962753	0.0937747		12.0198	0.0333563	0.00277512	0.0151947
260907_at	At1g02570	Unique		2.47776	0.00181762	0.000746916	0.0172065		5.69319	0.0210778	0.00370228	0.025501		3.18375	0.0473945	0.0148864	0.0683794		3.49233	0.0328889	0.00941747	0.051929
260908_at	At1g02580	Unique		2.20538	0.00108714	0.00049699	0.0149506		4.08001	0.30443	0.074615	0.135233		4.20965	0.326395	0.077535	0.135714		3.6968	0.0520016	0.0140666	0.0616854
260930_at	At1g02620	Unique		2.43617	0.000934599	0.000390223	0.0125489		6.96304	0.044591	0.00640396	0.0303267		3.46084	0.0682102	0.0197092	0.0754646		4.76403	0.0475246	0.00997572	0.0457599
260914_at	At1g02640	Duplicate		5.98447	0.18718	0.031632	0.0722943		6.93834	0.151391	0.0218195	0.0560783		7.72141	3.37563	0.437178	0.237947		7.7467	1.83649	0.237067	0.174935
260915_at	At1g02660	Unique		2.88086	0.213906	0.0819559	0.160542		7.60758	0.0925405	0.0121642	0.039987		7.5057	2.87661	0.383257	0.225969		8.04533	3.2485	0.403775	0.224026
260909_at	At1g02670	Unique		3.10685	0.0180381	0.00584721	0.043229		3.8322	0.232474	0.0606632	0.125817		4.99486	0.368768	0.0738294	0.121577		4.93616	0.125417	0.0254078	0.0717445
260929_at	At1g02680	Unique		4.0293	0.0872203	0.0215225	0.0732958		8.27618	0.0270853	0.00327269	0.0198855		7.17415	0.307274	0.0428307	0.0772667		7.42616	0.0700502	0.00943289	0.0356402
260910_at	At1g02690	Duplicate		5.6349	0.134474	0.0237561	0.0650777		7.26682	0.0371072	0.00510639	0.0265085		6.74593	2.10077	0.311413	0.214856		7.06964	0.201527	0.028506	0.0634994
260917_at	At1g02700	Unique		2.96735	0.232649	0.0770394	0.162548		5.29492	0.103969	0.0196357	0.0608967		4.63527	6.16936	1.33096	0.535852		3.86284	1.29924	0.336343	0.295079
260905_at	At1g02710	Unique		3.48457	0.0041046	0.00118419	0.0183859		5.46694	0.0778587	0.0142417	0.0510398		5.85938	0.197296	0.0336719	0.0758067		6.68901	0.0323543	0.00483693	0.0268908
260928_at	At1g02720	Duplicate		3.93445	0.0184173	0.00473604	0.0344928		7.54641	0.0425898	0.00564372	0.0273472		5.8839	1.23899	0.210572	0.189177		6.32031	0.18839	0.029807	0.0686736
262109_at	At1g02730	Duplicate		7.5838	0.125288	0.0165263	0.0466733		8.86921	0.0317902	0.00358433	0.020103		7.49905	4.13077	0.550839	0.271025		8.09565	0.916137	0.113164	0.11823
262108_at	At1g02740	Unique		2.85569	0.028505	0.0102549	0.059122		7.19008	0.0862248	0.0119922	0.0408397		5.88548	0.127573	0.0216759	0.0606872		5.613	0.0629669	0.011218	0.0447055
262107_at	At1g02750	Unique		5.51393	0.288236	0.0503629	0.0973673		8.64988	0.416194	0.0481156	0.0745826		7.35898	0.291483	0.0396092	0.073365		7.68532	0.096744	0.0125882	0.0404716
262117_at	At1g02780	Duplicate		12.3007	0.0225514	0.00184168	0.0122084		13.2916	0.0111081	0.00083572	0.00792941		12.999	0.453054	0.0348529	0.0517802		13.2484	0.070415	0.00531499	0.0200295
262122_at	At1g02790	Unique		2.50002	0.00124158	0.000500101	0.0140943		4.17486	0.118633	0.0284161	0.0825013		5.53627	12.5253	2.26241	0.639259		3.07118	0.0246596	0.00802933	0.0511313
262121_at	At1g02800	Duplicate		2.20624	0.0243613	0.0108864	0.0707452		6.49417	0.121176	0.0186592	0.0536025		5.45194	5.53405	1.01506	0.43149		5.98976	0.556607	0.0929263	0.124556
262105_at	At1g02810	Duplicate		2.45278	0.000909027	0.000373202	0.0122922		5.342	0.11302	0.0211569	0.0629324		5.0318	3.60999	0.717434	0.377598		3.66008	0.114043	0.0311587	0.0922665
262115_at	At1g02813	Unique		1.98252	0.000434755	0.000220395	0.0105173		5.36988	0.0341012	0.00635046	0.0343891		2.53176	3.60203	1.42274	0.749638		2.11808	0.151249	0.0714085	0.183613
262116_at	At1g02816	Duplicate		6.25394	0.0259642	0.00429707	0.0257652		9.47274	0.0117616	0.00124162	0.0114487		8.39337	1.09167	0.130064	0.124483		8.60396	0.507693	0.0590069	0.0828137
262113_at	At1g02820	Duplicate		6.01871	1.31484	0.229912	0.190517		8.17304	0.766198	0.093747	0.107099		6.43619	4.05143	0.629477	0.312734		8.18793	3.92235	0.479041	0.24188
262132_at	At1g02830	Unique		2.55765	0.020793	0.00816139	0.0563791		5.33122	0.0964868	0.0180984	0.0582649		2.70738	0.0725833	0.0268094	0.0995105		3.48204	0.0408084	0.0117197	0.0580151
262110_at	At1g02840	Unique		8.74925	0.00578894	0.0006678	0.00869618		10.4705	0.0156769	0.00149725	0.0119581		9.52172	0.283595	0.029784	0.0559286		9.8339	0.0384854	0.00391355	0.0199491
262118_at	At1g02850	Duplicate		2.83611	0.269565	0.0964584	0.183067		8.88182	0.546806	0.0615646	0.0832558		6.74608	5.46008	0.809371	0.346376		7.11462	3.10236	0.436054	0.247568
262114_at	At1g02860	Unique		3.90291	0.0614439	0.0160285	0.0635112		8.28405	0.0195857	0.00236427	0.0168938		6.98782	1.86909	0.267478	0.195647		7.15865	0.312424	0.0436429	0.0780802
262112_at	At1g02870	Unique		8.3587	0.0305042	0.00369072	0.0208949		10.502	0.0302945	0.00288465	0.0165734		8.1626	0.763565	0.0935444	0.107052		8.21597	0.224025	0.027267	0.0576089
262130_at	At1g02890	Duplicate		6.48614	0.155152	0.0235314	0.0607284		8.12471	0.367645	0.0452502	0.0746288		8.52191	0.477292	0.0560076	0.081069		9.04275	0.0563973	0.00623675	0.0262621
262131_at	At1g02900	Unique		3.31625	0.0461314	0.0142628	0.0647667		6.74253	0.29484	0.0437283	0.0805323		6.31759	5.99931	0.94962	0.387703		5.20718	0.315033	0.0604998	0.107789
262104_at	At1g02910	Unique		8.17952	0.0345466	0.00429679	0.0227235		9.7377	0.0153006	0.00157128	0.0127028		7.39123	1.10331	0.149273	0.142113		8.83354	0.0634154	0.00717894	0.0285077
262119_s_at	At1g02930	Tandem Duplicate		7.54389	0.723681	0.0931551	0.112766		13.6454	0.0198081	0.00145164	0.0103142		9.95769	6.49128	0.651886	0.255862		10.939	3.19095	0.291703	0.163298
262103_at	At1g02940	Unique		2.50803	0.000895121	0.00035993	0.0119291		5.82873	0.0314091	0.00538868	0.0304057		2.98386	0.65603	0.21986	0.271446		2.90878	0.057076	0.0196219	0.0821325
262120_at	At1g02950	Unique		4.10461	0.218113	0.0516226	0.113781		7.19666	0.104381	0.0145041	0.0448931		5.59734	1.43326	0.256061	0.213885		5.7266	0.127453	0.0222564	0.0623417
262111_at	At1g02960	Unique		4.34772	0.0198805	0.00453127	0.0324304		7.80316	0.03184	0.00408039	0.0228673		6.7812	0.12417	0.0183109	0.051964		7.30409	0.129384	0.0177139	0.0492464
262106_at	At1g02970	Unique		2.86082	0.0320215	0.0110421	0.0625505		6.96753	0.0517523	0.00742763	0.0326502		5.15441	0.836734	0.162334	0.177466		4.80099	0.0531142	0.0110632	0.0480037
262102_at	At1g02980	Duplicate		3.07203	0.00500864	0.00163852	0.0230375		5.00422	0.183779	0.0367249	0.0856667		3.77164	0.361765	0.0959171	0.159471		3.60845	0.0240714	0.00667083	0.0429961
263170_at	At1g03000	Unique		6.96221	0.0192464	0.00277339	0.0199263		9.16852	0.0300499	0.00327751	0.018907		7.78394	0.123264	0.0158357	0.0451044		8.37305	0.0739344	0.00883004	0.0324743
263169_at	At1g03010	Duplicate		2.1354	0.00105362	0.000496867	0.0152007		4.36898	0.641756	0.146889	0.18336		3.08624	1.01935	0.330288	0.327138		3.25159	0.0212874	0.00654678	0.044871
263168_at	At1g03020	Duplicate		3.89426	0.350086	0.0868938	0.151937		6.85971	0.253315	0.0369279	0.073371		4.34284	1.71074	0.393922	0.301175		5.71439	0.352297	0.0616509	0.103869
263167_at	At1g03030	Unique		6.15939	0.0572578	0.00915999	0.038849		8.36288	0.0582199	0.0069617	0.0288523		7.72375	0.344263	0.044572	0.0759656		8.35251	0.100602	0.0120446	0.0379741
263117_at	At1g03040	Duplicate		6.36469	0.0295774	0.00459624	0.0270211		9.41294	0.0362101	0.00384684	0.0202157		8.18843	0.50876	0.0621315	0.0871075		8.02736	0.0907641	0.0113068	0.0375305
263166_at	At1g03050	Duplicate		2.17027	0.000551008	0.000254687	0.010816		2.93156	0.204947	0.0699104	0.154426		3.1106	4.87686	1.56782	0.709946		2.24567	0.00472473	0.00210393	0.0306085
263115_at	At1g03055	Unique		5.92006	0.0729692	0.0124771	0.0456293		7.3336	0.0591107	0.00806026	0.0331525		5.02046	1.26384	0.251739	0.223925		7.07496	0.398663	0.0563484	0.0892439
263165_at	At1g03060	Duplicate		6.4076	0.0176753	0.00273478	0.0207486		8.16518	0.149312	0.0182864	0.047324		7.52512	0.274229	0.0364418	0.0695894		7.69032	0.0951119	0.0123677	0.0401026
263164_at	At1g03070	Duplicate		2.14522	0.000153806	7.21533e-05	0.00578116		7.80456	0.0181998	0.00233194	0.0172856		5.26093	1.35615	0.257778	0.221356		6.38063	1.63012	0.255479	0.200099
263112_at	At1g03080	Unique		6.08403	0.0743903	0.0122466	0.0448298		7.146	0.106673	0.0149277	0.0457051		8.2998	0.518652	0.0624897	0.0867701		8.65507	0.250078	0.0288938	0.0577786
263118_at	At1g03090	Unique		5.42685	0.243731	0.0456644	0.0909721		7.59439	0.0591404	0.00778738	0.0320221		9.18858	0.857484	0.0933206	0.100778		9.9808	0.666331	0.0667613	0.0817861
263143_at	At1g03100	Unique		3.62572	0.00196896	0.000552524	0.0122384		6.45342	0.0235314	0.00364634	0.0237702		4.64502	0.0935061	0.0201304	0.0658312		5.52489	0.0778585	0.0140923	0.0505045
263119_at	At1g03110	Unique		6.75821	0.0250703	0.00371289	0.0234287		8.69908	0.00624567	0.00071797	0.00908482		6.67717	0.892686	0.133692	0.1415		7.20734	0.396204	0.0549722	0.0873342
263114_at	At1g03130	Duplicate		12.7591	0.112123	0.00879074	0.0262439		13.3341	0.0115525	0.000866384	0.0080607		11.1734	6.44554	0.576864	0.227218		13.7773	0.414984	0.0301209	0.0467575
263116_s_at	At1g03140	Unique		8.40222	0.0542423	0.0064687	0.0277188		10.072	0.00831307	0.000825362	0.0090524		9.72603	0.180817	0.018591	0.0437204		10.0739	0.0943402	0.00936477	0.0304894
263113_at	At1g03150	Unique		7.16239	0.0601349	0.0083696	0.0342377		9.13354	0.0565531	0.0061918	0.0260369		7.91718	0.094701	0.0119615	0.0388693		8.6876	0.128454	0.014786	0.0412548
263163_at	At1g03160	Unique		7.58722	0.0105642	0.00136844	0.0135468		9.15851	0.0893118	0.00975179	0.032631		7.13013	1.94375	0.272611	0.195534		8.898	0.194558	0.0218654	0.0495715
264363_at	At1g03170	Duplicate		2.17958	0.000466199	0.0002149	0.00990632		4.94897	0.0708403	0.0143141	0.0537806		4.89093	5.8227	1.19051	0.493368		3.4012	0.175522	0.0516061	0.123178
264358_at	At1g03180	Unique		2.15539	0.0037312	0.00174579	0.0283399		5.90841	0.0750561	0.0127033	0.0463684		4.68788	0.571697	0.121952	0.16129		4.52919	0.140688	0.0310626	0.0828149
264356_at	At1g03190	Unique		4.77132	0.0171641	0.00363444	0.0274582		7.10986	0.0253356	0.00356344	0.0223874		6.38869	0.226657	0.0354779	0.0745201		6.95167	0.0735104	0.0105745	0.0390018
264355_at	At1g03210	Duplicate		3.74879	0.0605296	0.0163327	0.0656286		9.99372	0.0817119	0.00817632	0.0286032		8.37684	0.863733	0.10311	0.110945		8.02368	0.180765	0.022529	0.0529888
264365_s_at	At1g03220	Tandem Duplicate		8.12848	0.36661	0.0437804	0.0744891		11.1377	0.283864	0.0254867	0.0478364		9.80203	3.00381	0.306448	0.176816		10.2926	0.601266	0.0584176	0.0753373
264354_s_at	At1g03240	Duplicate		1.94878	0.000370382	0.000190991	0.00987556		5.34466	0.82495	0.15435	0.169939		4.44719	2.3432	0.526895	0.344207		4.83637	0.939754	0.19431	0.200442
264366_at	At1g03250	Unique		6.25332	0.0396111	0.00632355	0.0318271		9.2179	0.00935564	0.00101494	0.0104931		7.29044	0.141125	0.0193576	0.0515286		8.15046	0.123612	0.0151662	0.0431368
264353_at	At1g03260	Unique		4.74424	0.020992	0.00435635	0.0305394		7.93051	0.00352116	0.000444002	0.00748242		6.34148	0.250915	0.0395673	0.0789901		6.90935	0.0750195	0.0108577	0.0396415
264352_at	At1g03270	Unique		3.8756	0.0253572	0.00651272	0.0410877		6.35714	0.0129074	0.00203038	0.0178714		5.84043	1.75521	0.300528	0.22684		6.35034	0.282772	0.0445287	0.0837378
264368_at	At1g03280	Duplicate		7.05645	0.00862437	0.00121511	0.0131606		8.60065	0.0621429	0.00722538	0.0289844		8.21196	0.101057	0.0123061	0.0387112		8.36604	0.0413896	0.00494733	0.0243179
264362_at	At1g03290	Unique		2.86918	0.0878076	0.0304692	0.103278		9.51394	0.028644	0.00301075	0.0177892		7.77786	0.85897	0.110438	0.11916		8.10566	0.377185	0.0465335	0.0757686
264361_at	At1g03300	Duplicate		3.46466	0.0086648	0.00255495	0.026867		6.36612	0.0448672	0.00704781	0.0332728		4.9244	0.378357	0.076833	0.12491		5.27167	0.265268	0.0503195	0.0976999
264360_at	At1g03310	Unique		8.91028	0.0862118	0.00951489	0.0329528		10.3268	0.0895105	0.00866779	0.0289715		7.82452	2.15408	0.275298	0.187574		9.51209	0.476297	0.0500728	0.0725542
264359_at	At1g03320	Unique		2.56173	0.00438744	0.00171724	0.0258566		5.62419	0.116444	0.0207041	0.0606735		2.63466	0.0863278	0.0327662	0.111519		2.57469	0.0331058	0.0128582	0.0706688
264364_at	At1g03330	Unique		9.24142	0.015954	0.00171171	0.0136677		10.8321	0.0141817	0.00130923	0.0109939		9.9616	0.307786	0.0308972	0.0556923		9.85242	0.0444217	0.00450871	0.0213922
264367_at	At1g03350	Unique		6.89546	0.0181729	0.00260563	0.0195501		9.16943	0.0375366	0.00409366	0.0211293		8.9743	0.0791309	0.0088175	0.0313453		9.87131	0.0540693	0.00547742	0.0235559
264357_at	At1g03360	Unique		6.94527	0.0669278	0.00968258	0.037249		8.33733	0.00954454	0.0011448	0.0117179		6.98559	1.39281	0.199383	0.168944		7.3735	0.498084	0.0675505	0.0957144
264351_at	At1g03370	Unique		4.83344	0.0128434	0.00272918	0.0234468		9.13574	0.0187136	0.00204839	0.0149739		7.23294	1.07252	0.148282	0.143181		8.14898	0.357764	0.0439029	0.0733998
264828_at	At1g03380	Unique		4.81123	0.0210907	0.00434742	0.0301849		8.66376	0.0391691	0.00452102	0.0228436		6.8951	0.719639	0.10437	0.123032		8.02502	0.262715	0.032737	0.0638699
264827_at	At1g03390	Unique		2.76865	0.00152803	0.000557327	0.0141188		4.11725	0.184909	0.0449109	0.104441		3.15168	0.991351	0.314547	0.315916		3.03217	0.0204994	0.00676064	0.047219
264843_at	At1g03400	Tandem Duplicate		6.46527	0.0729473	0.0110608	0.0417751		10.7084	0.102347	0.00955765	0.0298753		7.43013	3.69133	0.496806	0.25858		10.0094	0.117286	0.0117177	0.034215
264826_at	At1g03410	Tandem Duplicate		2.52619	0.115334	0.0435816	0.134435		6.63327	0.266798	0.0402211	0.0778688		4.58878	0.580319	0.126465	0.166011		5.98146	0.3492	0.0583804	0.0987938
264824_at	At1g03420	Unique		6.59501	2.23904	0.344596	0.22689		9.92792	0.178502	0.0179798	0.0425562		8.44719	1.10972	0.131371	0.124708		8.60939	0.216576	0.0251558	0.0540546
264838_at	At1g03430	Duplicate		4.74076	0.594558	0.120604	0.162648		9.79631	0.0144566	0.00147572	0.0122735		7.12452	0.501754	0.0704264	0.0994237		8.29823	0.111376	0.0134217	0.0402172
264840_at	At1g03440	Duplicate		6.59275	0.0340244	0.00511589	0.0279787		8.17475	0.01878	0.00229732	0.0167638		6.36757	0.679899	0.106775	0.129494		8.22407	0.387266	0.0470894	0.075669
264823_at	At1g03445	Unique		2.32651	0.000626117	0.00029456	0.0107553		6.32638	0.0983742	0.0155498	0.0495776		3.28395	0.241598	0.0735694	0.149675		3.45304	0.0458106	0.0132668	0.0619844
264822_at	At1g03457	Duplicate		2.62521	0.0254721	0.00978942	0.0607951		5.65842	0.0682319	0.0120585	0.0461635		5.75211	2.0965	0.364475	0.251722		5.95096	0.540701	0.0908594	0.123564
264821_at	At1g03470	Unique		4.11699	0.0579012	0.0145546	0.0584472		5.7253	0.20502	0.0358094	0.079086		6.419	1.41562	0.220536	0.185356		7.17484	0.181373	0.025279	0.0593573
264820_at	At1g03475	Unique		10.581	0.0251129	0.00235185	0.0149769		11.3728	0.00728458	0.000640524	0.0075047		9.38608	2.04736	0.218127	0.152445		10.6715	0.212726	0.0199341	0.0432202
264829_at	At1g03490	Unique		2.75859	0.00177228	0.000660278	0.0152608		4.03984	0.0607847	0.0150463	0.0610286		2.79131	0.0847408	0.0303588	0.104289		3.21328	0.0455254	0.0141679	0.0664015
265091_s_at	At1g03495			3.71501	0.897233	0.268673	0.254972		7.19753	1.7151	0.23829	0.181954		4.55584	4.82395	1.05885	0.482095		4.4797	2.09681	0.468069	0.323244
264819_at	At1g03510	Unique		2.87554	0.00836716	0.00291301	0.0318104		6.01461	0.0742778	0.0123496	0.0453129		3.71743	0.192046	0.0516609	0.117885		4.21795	0.102584	0.0243208	0.0759343
264844_at	At1g03520	Duplicate		4.63254	0.0941489	0.0204185	0.0662352		8.15902	0.00453301	0.000555582	0.00825193		6.64071	0.607388	0.0914644	0.11736		7.47916	0.277903	0.037157	0.0704846
264818_at	At1g03530	Unique		5.92934	0.026246	0.00443827	0.0273228		8.13682	0.0502044	0.00617003	0.027537		6.30214	0.583956	0.0926599	0.121256		6.52229	0.308223	0.0472568	0.0851202
264817_at	At1g03540	Unique		2.36988	0.00108331	0.000468982	0.0138883		4.88423	0.126845	0.0259704	0.072919		4.24156	0.102826	0.0242424	0.0756006		4.16184	0.0641631	0.015417	0.0608636
264835_at	At1g03550	Duplicate		2.45484	0.00734269	0.00298447	0.0349063		6.32225	0.498401	0.0788328	0.111665		6.37629	2.01179	0.315511	0.222445		6.19727	0.33779	0.0545063	0.0937828
264816_at	At1g03560	Unique		4.73153	0.0102394	0.00214103	0.0213863		6.23426	0.112996	0.0181249	0.0539195		6.29582	0.112169	0.0178164	0.0531966		7.59757	0.0642233	0.00845314	0.0333558
264833_at	At1g03590	Duplicate		6.6686	0.102648	0.0156179	0.0480441		7.95677	0.0240249	0.00301943	0.0194802		8.02518	0.749801	0.0934311	0.107899		8.39296	0.252926	0.0301355	0.0599214
264837_at	At1g03600	Unique		13.0745	0.00873471	0.000668393	0.00714825		13.1846	0.0254118	0.00192739	0.0120907		11.494	5.31789	0.462668	0.200632		13.9529	0.10315	0.00739276	0.0230182
264836_at	At1g03610	Duplicate		6.44469	0.128901	0.019941	0.0557091		9.40042	0.00220944	0.000235036	0.00500027		8.21046	0.8408	0.102406	0.111681		9.47741	0.405829	0.0428207	0.0672174
264815_at	At1g03620	Unique		1.85521	0.000200433	0.000108296	0.00763116		6.74627	0.0437549	0.0064858	0.0310063		4.47239	2.64273	0.5909	0.363486		4.14053	0.204303	0.0493421	0.109164
264839_at	At1g03630	Duplicate		11.4554	0.0164719	0.00143758	0.0112037		12.1407	0.0220825	0.00181888	0.0122399		9.21724	6.46075	0.700942	0.275766		12.5383	0.121638	0.00970134	0.0278161
264832_at	At1g03660	Unique		4.40148	0.0106901	0.00243974	0.0234905		9.46732	1.39398	0.147241	0.12471		5.59013	0.869898	0.155613	0.166845		6.23384	1.07865	0.173031	0.166604
264845_at	At1g03675			12.4395	0.0109172	0.000878664	0.00839952		13.1771	0.0104343	0.000791857	0.00775201		10.7958	2.89578	0.268231	0.157625		12.4632	0.101384	0.00813467	0.0255479
264831_at	At1g03687	Unique		5.13604	0.0771309	0.0147327	0.0540736		7.22229	0.0559229	0.00774311	0.0327431		5.85719	0.385513	0.0658188	0.106006		5.78343	0.150929	0.0260968	0.067174
264842_at	At1g03700	Duplicate		2.02984	0.000368139	0.000183749	0.00945244		3.39617	0.0720435	0.0212131	0.0790328		3.14597	1.60263	0.509425	0.402405		2.79565	0.018261	0.00653193	0.048337
264830_at	At1g03710	Unique		2.97742	2.82493	0.891554	0.5645		4.80542	4.80008	0.998889	0.455925		4.62629	4.01415	0.867683	0.433076		2.95588	0.0200199	0.00677292	0.0478679
264825_at	At1g03720	Unique		2.41942	0.000546084	0.000226765	0.00965868		2.77608	0.0589778	0.021245	0.0874808		3.13017	0.262073	0.0837248	0.163547		3.04865	0.0248305	0.00814474	0.0516874
264834_at	At1g03730	Unique		7.05474	0.0261204	0.00370449	0.0229091		9.91234	0.0216457	0.00218371	0.0148426		8.44814	0.42183	0.0499317	0.076879		8.41103	0.173036	0.0205725	0.049456
264841_at	At1g03740	Unique		2.86361	0.0132344	0.00456585	0.0401733		8.91654	0.0569969	0.00639227	0.026775		5.96215	1.37109	0.229965	0.196395		7.05079	0.435803	0.0618091	0.0936283
265088_at	At1g03750	Unique		3.08583	0.00292936	0.00095609	0.0175394		6.17322	0.0523615	0.00848203	0.0370676		5.67038	0.394155	0.0695111	0.110719		6.04949	0.220235	0.0364056	0.0775755
265087_at	At1g03760	Unique		4.39566	0.0182646	0.00415467	0.0307454		7.53463	0.0226914	0.00301161	0.0199926		6.17632	0.436134	0.0706139	0.106925		6.5364	0.195901	0.0299708	0.0677142
265086_at	At1g03770	Unique		3.23746	0.00343963	0.00107141	0.0181155		4.77658	0.509841	0.106738	0.149486		5.72396	0.782305	0.136672	0.154522		5.44276	0.0975295	0.0179191	0.0573785
265085_at	At1g03780	Unique		5.51497	0.053741	0.00976739	0.0420349		5.87327	0.184018	0.0313315	0.0730383		6.42072	2.02083	0.314736	0.221402		7.05136	0.470436	0.0667156	0.0972697
265084_at	At1g03790	Unique		1.98813	0.346413	0.161813	0.296041		5.15878	0.229822	0.0445496	0.0929284		2.97462	5.20924	1.75123	0.767284		2.052	0.558282	0.272068	0.364125
265083_at	At1g03820	Unique		6.47787	0.161524	0.0248786	0.062042		8.7561	0.112894	0.0128932	0.0383729		7.3557	2.80212	0.380945	0.227572		7.10286	0.288561	0.040626	0.0756285
265082_at	At1g03830	Unique		3.28679	0.0045481	0.00138468	0.0205184		5.89155	0.173423	0.0294359	0.0706845		5.42773	1.00496	0.185152	0.184695		5.45661	0.270048	0.04949	0.0952352
265081_at	At1g03840	Duplicate		2.05219	0.000373091	0.000182616	0.00941216		3.28949	0.215001	0.06536	0.140959		3.06636	1.29556	0.422507	0.371198		2.91435	0.0306717	0.0105244	0.0600934
265067_at	At1g03850	Unique		4.68849	0.410862	0.0951519	0.136715		10.2357	0.306728	0.0299666	0.0541078		7.03283	4.66239	0.662947	0.307025		6.48467	1.28946	0.198847	0.175112
265037_at	At1g03860	Duplicate		10.0566	0.039767	0.00392024	0.0198293		11.2726	0.0353425	0.00313525	0.0166772		9.50257	0.469049	0.0493603	0.0720723		9.93688	0.228808	0.0230261	0.0481377
265066_at	At1g03870	Unique		11.9187	0.0417769	0.00354024	0.0171491		9.72376	0.051424	0.00528848	0.0233211		9.54618	5.30747	0.555978	0.241332		9.95234	3.1939	0.32092	0.179571
265095_at	At1g03880	Duplicate		2.29735	0.00110314	0.000483147	0.0144573		3.72796	0.38107	0.10222	0.165589		3.93944	13.1092	3.32768	0.91908		2.99388	0.0215272	0.00719042	0.0490072
265094_at	At1g03890	Unique		2.15142	0.000775355	0.000363226	0.0129427		4.6388	0.0670623	0.0144568	0.0558256		3.22374	10.8384	3.36205	1.02123		2.17922	0.00735464	0.0033749	0.0393532
265043_at	At1g03900	Unique		7.47147	0.0207362	0.00276241	0.0192734		11.2519	0.0193808	0.00172245	0.0123726		8.9392	0.282227	0.0315718	0.0594293		9.08661	0.0759517	0.00835865	0.0303296
265093_at	At1g03905	Duplicate		2.40047	0.155731	0.0657429	0.164396		6.76082	0.810835	0.119931	0.133188		4.96487	1.45527	0.293113	0.242976		4.9576	0.56787	0.114545	0.152003
265092_at	At1g03910	Unique		8.04219	0.0164585	0.00205796	0.0159522		9.7056	0.0564467	0.00581589	0.0244792		8.97888	0.183351	0.0204202	0.0476891		9.288	0.0401543	0.00432324	0.0215747
265038_at	At1g03920	Duplicate		2.71392	0.000548828	0.000203486	0.0086322		5.73561	0.0547498	0.00954559	0.0407954		4.37254	2.24238	0.512833	0.342469		4.19936	0.0343373	0.00817681	0.0441266
265045_s_at	At1g03930	Duplicate		6.00534	0.0414217	0.0068405	0.0338903		7.90793	0.087342	0.0110449	0.0373722		7.68282	0.305839	0.0398082	0.0719823		9.08984	0.0654363	0.00719884	0.0281419
265044_at	At1g03950	Duplicate		6.36572	0.996329	0.156432	0.156803		9.21893	0.172433	0.0187043	0.0450433		7.50143	0.670127	0.0893332	0.109128		7.88167	0.25668	0.0325667	0.0642802
265090_at	At1g03960	Duplicate		4.35421	0.0489624	0.0112086	0.0508185		6.81214	0.0582568	0.00855191	0.0354315		5.67613	0.170936	0.0301148	0.072839		5.83372	0.0775218	0.0132886	0.0477273
265040_at	At1g03970	Unique		4.02727	0.0506043	0.0125245	0.0558576		8.40427	0.00797289	0.000948671	0.0106245		7.3223	0.421535	0.0575686	0.0886685		7.37317	0.122767	0.0166504	0.047521
265065_at	At1g03980	Duplicate		2.52247	0.0106769	0.00424236	0.0409636		6.22983	0.017033	0.00273411	0.0209493		3.81276	0.134964	0.0353979	0.0963539		4.40152	0.0270747	0.00615121	0.0373834
265099_at	At1g03990	Duplicate		2.26762	0.00056363	0.000250697	0.0104695		5.36075	0.0458165	0.00854665	0.0399287		4.40646	1.73858	0.394552	0.299232		4.25	0.191045	0.0449516	0.102844
265039_at	At1g04000	Duplicate		5.18829	0.0178894	0.00344046	0.0257795		7.22842	0.00754936	0.0010444	0.0120202		7.21023	0.307868	0.0426989	0.0769544		7.32885	0.194837	0.0265849	0.0602282
265098_at	At1g04010	Unique		3.23917	0.016456	0.00507181	0.039603		7.24957	0.0286856	0.00395687	0.0233625		5.47701	0.239241	0.0436809	0.0893046		6.19627	0.0978023	0.015784	0.0504712
265097_at	At1g04020	Unique		6.84169	0.148713	0.0213526	0.0563652		7.66143	0.0890802	0.0116271	0.0389566		6.72408	1.64745	0.245007	0.190886		7.70501	0.426896	0.055405	0.0847985
265096_at	At1g04030	Unique		2.7879	0.0361679	0.012629	0.0682158		5.39361	0.13356	0.0247626	0.0677577		5.00037	1.18981	0.237945	0.218141		4.00599	0.271016	0.0676527	0.129953
265042_at	At1g04040	Duplicate		11.3057	0.0319785	0.00284318	0.0158173		10.5002	0.0776419	0.00739432	0.0265369		8.26043	7.50697	0.908787	0.331688		9.62515	1.08748	0.112983	0.108343
257404_at	At1g04050	Unique		3.60692	0.0123072	0.00338195	0.0307569		5.79495	0.0535264	0.00923673	0.039924		5.17855	0.494769	0.0955422	0.135829		5.56152	0.0470299	0.0084563	0.0389936
265089_at	At1g04060			2.07698	0.00379729	0.00183338	0.0296691		3.65682	0.0818488	0.0223825	0.0782353		3.40374	0.150406	0.0441884	0.11394		4.04399	0.015646	0.00386895	0.0309308
265041_at	At1g04070	Duplicate		5.05544	0.0198775	0.00393153	0.0278883		7.6041	0.0282304	0.00371253	0.0220959		7.06683	0.55253	0.0781864	0.105185		6.66997	0.181271	0.0271772	0.0638323
265036_at	At1g04080	Unique		8.12499	0.0146665	0.00179592	0.0149053		9.93003	0.0283643	0.00285641	0.0169604		9.09496	0.278937	0.0306693	0.05807		9.63852	0.028613	0.00296861	0.0175498
264320_at	At1g04090	Duplicate		2.49021	0.000827356	0.000336855	0.0115507		6.02807	0.126389	0.0209668	0.0589762		4.37317	0.865024	0.197802	0.212675		4.30327	0.0180973	0.00420548	0.0312614
264328_at	At1g04100	Unique		3.52167	0.0121057	0.00345829	0.0312425		8.10597	0.0215786	0.00266206	0.018122		6.11479	0.501947	0.0820874	0.115864		6.21814	0.0585496	0.00941593	0.0389136
264319_at	At1g04110	Unique		4.67825	0.581381	0.115857	0.162985		7.6399	0.0459054	0.00600864	0.0280443		4.4666	3.22113	0.721159	0.401816		6.06972	0.509406	0.0839257	0.117588
264330_at	At1g04120	Duplicate		6.61969	0.020082	0.00301989	0.0214075		8.56583	0.0909742	0.0106206	0.0352119		8.63009	1.10759	0.128341	0.121948		8.37719	0.169624	0.0202483	0.0491637
264331_at	At1g04130	Unique		5.02354	0.0119054	0.00237854	0.0217201		7.47183	0.0266106	0.00356146	0.0218324		6.30767	0.354783	0.0562462	0.0944304		7.05734	0.704428	0.099815	0.118926
264329_at	At1g04140	Duplicate		7.69788	0.0441724	0.00569323	0.0273026		10.4695	0.0306025	0.00292303	0.0167092		8.43713	0.0990471	0.0117394	0.0373015		9.10102	0.142168	0.0156211	0.0414296
264325_at	At1g04150	Duplicate		1.98981	0.000457719	0.000231234	0.010752		6.28429	0.0135521	0.0021565	0.0185245		3.26291	0.559433	0.171452	0.229228		2.95755	0.0309443	0.0104628	0.0594783
264324_at	At1g04160	Duplicate		3.36685	0.0350699	0.0107349	0.0556216		5.99114	0.0623055	0.0103996	0.0416633		5.90784	0.967059	0.163691	0.166455		5.79591	0.145728	0.0251432	0.0658642
264327_at	At1g04170	Duplicate		9.91876	0.101813	0.0103507	0.0321695		11.3661	0.0315665	0.00277726	0.0156316		9.40893	0.358777	0.0381315	0.0636608		9.91651	0.120424	0.0121438	0.0349944
264323_at	At1g04180	Duplicate		2.00074	0.000408249	0.000205021	0.0100989		3.03479	0.395866	0.130443	0.207322		2.56026	0.400048	0.156253	0.247043		2.78619	0.0851156	0.030549	0.104711
264322_at	At1g04190	Unique		7.85669	0.00938505	0.00118486	0.0123304		9.92122	0.0100829	0.00101629	0.0101211		8.18129	0.341987	0.0418011	0.0714798		8.58906	0.0801358	0.00932999	0.0329585
264321_at	At1g04200	Unique		5.24613	0.0476223	0.0090618	0.0415974		8.30425	0.0792303	0.00954094	0.0338958		7.4192	0.479121	0.0645785	0.0932965		7.30696	0.295105	0.0403868	0.0743449
264318_at	At1g04220	Duplicate		3.34724	0.0705895	0.0223751	0.0793749		6.49536	0.315336	0.0485479	0.0864537		7.16472	5.52094	0.770573	0.32795		5.92401	2.45557	0.414511	0.264521
264326_at	At1g04230	Unique		4.9671	0.0223518	0.00453009	0.0300991		8.10618	0.0242583	0.00299257	0.0192138		6.84907	0.210773	0.0307739	0.0670309		6.58916	0.0462659	0.00702151	0.0326438
263656_at	At1g04240	Duplicate		8.38696	0.0795979	0.00968979	0.0336392		8.80943	0.11432	0.012977	0.0383807		8.28951	1.85559	0.223848	0.164328		10.0398	0.759509	0.0756501	0.0868046
263664_at	At1g04250	Duplicate		8.91973	0.251545	0.0285009	0.0562284		9.4011	0.170191	0.0181033	0.0438823		7.6511	3.7875	0.495027	0.254362		9.39607	0.847736	0.0902223	0.0979905
263660_at	At1g04260	Unique		5.89435	0.0658593	0.0113357	0.0435384		9.51662	0.0136363	0.00143289	0.0122706		7.58202	0.507748	0.0669674	0.0939808		8.07856	0.0746853	0.00924487	0.0338285
263667_at	At1g04270	Duplicate		12.1573	0.0254318	0.0020971	0.0131175		13.039	0.0522225	0.00400511	0.0175261		11.8356	0.649843	0.054906	0.0681107		11.844	0.119031	0.0100499	0.0291294
263661_at	At1g04290	Unique		7.06602	0.174982	0.0251806	0.0592		9.83236	0.0850267	0.00864764	0.0296565		7.58053	0.633323	0.083546	0.104982		8.73791	0.113382	0.0129758	0.0385358
263654_at	At1g04300	Unique		6.92471	0.0525164	0.00749817	0.0330937		8.90116	0.0837575	0.00940972	0.0325136		8.6748	0.349218	0.0402566	0.0681222		9.33172	0.0591962	0.00634355	0.0260727
263653_at	At1g04310	Unique		2.62868	0.00210365	0.000798499	0.0174481		6.45799	0.0880491	0.0136341	0.0459478		6.62563	2.71407	0.409632	0.248647		6.0329	0.350653	0.0581235	0.0981551
263652_at	At1g04330	Unique		2.52763	0.000856121	0.000341734	0.0115759		2.5727	0.215756	0.0838633	0.180547		3.32575	0.580201	0.174457	0.229033		3.53616	0.0119733	0.00338595	0.0309439
263651_at	At1g04340	Duplicate		7.61264	0.02397	0.00319703	0.0203376		9.8201	0.0216097	0.00220056	0.0149696		8.65469	0.271217	0.0313376	0.0601737		8.5395	0.0391579	0.0045855	0.0231727
263668_at	At1g04350	Duplicate		8.63674	0.0176655	0.00205452	0.0153891		10.4011	0.0156804	0.00150758	0.0120393		7.70617	3.85308	0.5	0.254722		10.5521	0.191485	0.0181465	0.0414693
263650_at	At1g04360	Unique		3.04496	0.0265038	0.00913663	0.0534653		5.8076	0.0424094	0.0073024	0.0354597		3.54492	1.45519	0.410501	0.340294		4.22066	0.532042	0.126056	0.172819
263649_at	At1g04380	Duplicate		2.68928	0.00120011	0.000449148	0.0128818		5.52811	0.0656103	0.0118685	0.046335		3.58906	4.14268	1.15425	0.5671		3.17278	0.0137139	0.00432236	0.0369097
263648_at	At1g04390	Unique		2.14009	0.00594347	0.00274987	0.0360237		5.22959	0.559435	0.106975	0.143023		5.49984	0.107246	0.0194999	0.0595445		6.88305	0.05913	0.00859067	0.0353283
263669_at	At1g04400	Unique		9.07446	0.0622846	0.00681429	0.0275023		11.8391	0.270093	0.0228136	0.0438972		10.0769	0.546405	0.0542238	0.0733555		10.5569	0.250168	0.023697	0.0473781
263663_at	At1g04410	Duplicate		12.0616	0.00867834	0.000720546	0.00772349		13.693	0.00534128	0.000390074	0.00533733		12.3107	0.74546	0.0605536	0.0701339		12.4467	0.0364622	0.00292945	0.0153414
263678_at	At1g04420	Unique		10.6031	0.0453304	0.00426492	0.02008		10.6136	0.300134	0.0282784	0.0516175		8.52481	3.32768	0.390353	0.213987		10.3186	0.178161	0.0172661	0.040906
263662_at	At1g04430	Duplicate		9.92296	0.0971412	0.00991135	0.0314095		10.9693	0.0129122	0.00117711	0.010359		10.233	1.60773	0.157112	0.123909		10.9386	0.531816	0.0486185	0.0666685
263657_at	At1g04440	Duplicate		5.93934	0.0113475	0.00190788	0.0179354		9.24206	0.00445337	0.000481858	0.00722063		8.18414	0.543145	0.0663656	0.0900502		8.7447	0.0805355	0.00920963	0.0324525
263659_at	At1g04470	Duplicate		2.50661	0.00120731	0.000485623	0.0138619		3.01405	0.140079	0.0464753	0.124176		3.55087	5.18515	1.46025	0.641277		2.94377	0.0255173	0.00866825	0.0542643
263665_at	At1g04480	Duplicate		11.3628	0.0220335	0.00194236	0.0130634		12.6709	0.00681778	0.000538068	0.00651651		10.7951	0.657363	0.0608947	0.0751064		11.1548	0.192478	0.0172551	0.0393304
263658_at	At1g04490	Unique		2.82246	0.00453973	0.00161585	0.023872		3.11286	0.263383	0.0846112	0.164867		3.11551	0.323817	0.103937	0.182651		3.08586	0.0283786	0.00919634	0.0545908
263655_at	At1g04500	Duplicate		2.23308	0.000606924	0.000274413	0.0110322		5.10699	0.0774785	0.0151711	0.0545036		3.1509	1.70952	0.542549	0.414956		3.14248	0.0273765	0.00871177	0.0526523
263666_at	At1g04510	Duplicate		8.07597	0.0144082	0.00177287	0.0148631		10.0727	0.0472562	0.00469152	0.0215816		8.51668	0.36391	0.0427291	0.0708315		9.04939	0.056346	0.0062265	0.0262309
263677_at	At1g04520	Duplicate		6.11738	0.0810238	0.0130932	0.0465308		7.44825	0.0936125	0.0125684	0.0410783		5.95624	2.36477	0.397024	0.25818		6.71899	1.37148	0.204121	0.174298
264609_at	At1g04530	Unique		8.29579	0.134005	0.0163405	0.0441268		10.436	0.0291706	0.00279518	0.0163658		8.54587	0.670544	0.0784641	0.0958203		10.0615	0.760062	0.0755417	0.0866487
264601_at	At1g04540	Duplicate		2.53738	0.016504	0.0065698	0.0506301		4.83481	0.0416072	0.00860576	0.0421895		4.03635	3.99459	0.989655	0.495162		2.72886	0.0236247	0.00865735	0.0563251
264605_at	At1g04550	Duplicate		7.08594	0.0264604	0.00370841	0.0229562		8.10324	0.0275978	0.00340578	0.0205012		7.19441	0.469639	0.0652783	0.0952548		7.93555	0.389904	0.0491339	0.0786868
264612_at	At1g04560	Unique		3.06709	2.44113	0.707492	0.509411		5.7444	0.00976794	0.00170043	0.0172051		3.6661	10.774	2.93883	0.895334		3.50554	0.715875	0.204212	0.241359
264614_s_at	At1g04580	Duplicate		2.85248	0.00164325	0.000580638	0.0142111		4.5903	0.851171	0.185428	0.200987		4.96993	4.01867	0.808598	0.403359		4.14735	0.0164762	0.00397271	0.0309498
264615_at	At1g04590	Unique		7.65963	0.0650963	0.00847691	0.0333097		8.53111	0.0566732	0.00664312	0.0279051		8.17847	0.366556	0.0448196	0.0740283		9.02491	0.0593264	0.00657363	0.0269886
264599_at	At1g04600	Duplicate		2.64743	0.0014966	0.000569041	0.0146127		5.44925	0.0905726	0.0166211	0.0552283		3.68682	1.46606	0.397649	0.328416		3.39634	0.0262784	0.00773726	0.0477296
264598_at	At1g04610	Duplicate		3.14755	0.00088854	0.000284645	0.00947035		6.54005	0.00443418	0.000678003	0.0101818		4.9908	0.385855	0.0773131	0.124463		4.94402	0.0322125	0.00651544	0.0363021
264597_at	At1g04620	Unique		8.08042	0.0828438	0.0102829	0.0356202		9.37303	0.0653786	0.00697518	0.0272796		7.20616	2.01696	0.279893	0.197081		7.6861	0.99309	0.129206	0.129655
264596_at	At1g04630	Duplicate		2.21368	0.000757602	0.000347184	0.0124339		4.53072	0.178118	0.0393133	0.0931507		2.1802	0.0391614	0.0179623	0.0907681		2.23865	0.00763523	0.00341065	0.0390324
264613_at	At1g04640	Unique		9.29112	0.450694	0.0495566	0.0722558		10.6854	0.0321568	0.00300942	0.0167821		7.8239	2.3764	0.303736	0.197032		9.19282	0.257733	0.0280364	0.0552251
264610_at	At1g04645	Unique		2.36006	0.00157736	0.000674597	0.0168284		3.52465	0.462384	0.131186	0.192924		3.53352	2.94455	0.833319	0.485626		3.69032	0.0858193	0.0232552	0.0793831
264604_at	At1g04650	Unique		2.43697	0.0053307	0.00218312	0.02996		6.29028	0.0610046	0.00969823	0.0392655		3.65908	0.345623	0.0944564	0.160668		5.07521	0.167843	0.033071	0.0807229
264606_at	At1g04660	Unique		2.81623	0.101221	0.035073	0.112971		6.48215	0.294936	0.0454998	0.083781		6.66049	5.68082	0.852913	0.357849		7.82079	0.189815	0.0242705	0.0557076
264603_at	At1g04670	Unique		3.05371	0.00258364	0.000854468	0.0166452		4.06546	0.233514	0.0574384	0.118863		3.87197	2.94508	0.760616	0.443218		3.64286	0.041837	0.0114847	0.0561484
264611_at	At1g04680	Duplicate		9.19601	0.132034	0.0144085	0.0395133		10.473	0.191867	0.0183202	0.0418244		9.43105	2.73427	0.289923	0.175332		9.74912	0.470383	0.0482488	0.0703494
264607_at	At1g04690	Unique		9.24361	0.01832	0.00196237	0.0146427		12.1486	0.0115834	0.000953478	0.00885915		10.3923	0.229773	0.0221101	0.0461254		10.9152	0.122133	0.0111892	0.0320173
264602_at	At1g04700	Unique		2.65028	0.00256704	0.000977349	0.0191172		5.34858	0.0739219	0.0138209	0.0508333		5.05107	2.3156	0.458438	0.301265		5.09381	0.0613774	0.0120494	0.0486364
264608_at	At1g04710	Duplicate		7.62555	0.190437	0.0249797	0.0572274		8.67118	0.130019	0.0149944	0.041584		7.86029	0.391891	0.0498571	0.0796424		8.82899	0.0907253	0.0102758	0.0341156
264600_at	At1g04730	Unique		4.79716	0.0525531	0.0108634	0.0477876		6.89971	0.0441954	0.00640539	0.030469		5.66685	0.655423	0.115659	0.142863		5.70973	0.20045	0.0351067	0.0784129
264595_at	At1g04750	Tandem Duplicate		9.00053	0.0138344	0.00153507	0.0130681		11.6339	0.0159209	0.00136849	0.0108457		10.5627	0.286192	0.0270944	0.0506467		10.2439	0.0794463	0.00775545	0.0275151
261178_at	At1g04760	Tandem Duplicate		3.6797	0.0472461	0.0131498	0.0590705		7.23963	0.0485172	0.00670162	0.0304251		5.60853	1.92088	0.342493	0.247116		5.01738	0.215429	0.0429367	0.0925072
261177_at	At1g04770	Duplicate		7.61079	0.621967	0.0783982	0.103622		9.63104	0.0267013	0.00277242	0.0169665		8.61716	0.891695	0.103479	0.109583		9.0931	0.843111	0.0927199	0.100979
261176_at	At1g04780	Duplicate		6.05433	0.0104409	0.00172136	0.0168773		9.62433	0.0323201	0.00335816	0.0186795		8.00738	0.475051	0.0593267	0.0860756		8.37013	0.181811	0.0217214	0.0509422
261127_at	At1g04790	Unique		5.44471	0.392768	0.0731724	0.115105		8.26226	0.010121	0.00122496	0.0121762		7.06041	0.143562	0.0203334	0.0536648		7.21968	0.0277586	0.00384485	0.0230771
261175_at	At1g04800	Unique		8.34188	0.188849	0.022706	0.0520947		8.96209	0.0505378	0.00563906	0.0250841		7.63563	4.53876	0.594418	0.279012		9.3536	0.271026	0.0289756	0.0556579
261174_at	At1g04810	Duplicate		7.57344	0.0252482	0.00333438	0.0209808		9.68989	0.0219859	0.00226896	0.0153022		8.17502	0.143685	0.0175761	0.0463679		8.81435	0.120849	0.0137104	0.0394394
261129_at	At1g04820	Duplicate		10.3945	0.095345	0.00910958	0.0297061		11.2267	0.0449931	0.0040077	0.0188939		10.8733	1.64496	0.151285	0.117955		11.5031	0.244507	0.0212557	0.0429862
261173_at	At1g04830	Duplicate		6.70377	0.0100232	0.00148107	0.0149342		8.89611	0.019563	0.00219905	0.0157223		8.13199	0.372872	0.0458524	0.0750901		8.59299	0.345181	0.04017	0.0683721
261172_at	At1g04840	Unique		2.68157	0.00270151	0.00100837	0.0193827		4.9259	0.0282711	0.00573928	0.0341339		3.78845	0.0830711	0.0219274	0.0760787		4.96033	0.0310588	0.00626143	0.0355289
261153_at	At1g04850	Unique		7.94741	0.0078941	0.000984969	0.0111796		9.75396	0.037043	0.00379774	0.0197321		9.1548	0.204959	0.0223881	0.049452		9.03243	0.0407007	0.00450606	0.0223355
261128_at	At1g04860	Unique		7.37776	0.0369293	0.00502417	0.0260472		8.76343	0.0894862	0.0102113	0.0341353		8.10469	0.106509	0.0131416	0.0402676		8.2846	0.0470009	0.00567329	0.0261687
261130_at	At1g04870	Unique		8.27377	0.0220484	0.0026861	0.0179467		9.98415	0.0156336	0.00156584	0.0125233		8.44209	0.782651	0.0927082	0.104793		8.61701	0.169926	0.0197198	0.047838
261171_at	At1g04880	Unique		2.52839	0.0180185	0.00707511	0.0530903		5.50113	0.0875499	0.0159149	0.0537869		3.3823	2.37846	0.703208	0.45597		3.11042	0.0089033	0.00286241	0.0303359
261124_at	At1g04900	Unique		4.66578	0.125574	0.0271925	0.0759497		7.88021	0.0279061	0.00354129	0.0211988		5.67585	0.57503	0.101312	0.133602		5.78609	0.223886	0.0386939	0.0817765
261170_at	At1g04910	Unique		6.11108	0.0603442	0.00977529	0.0401976		9.37381	0.0639422	0.00682137	0.026976		7.79915	0.104882	0.0134479	0.0415244		8.23587	0.0698894	0.00848598	0.0320994
261169_at	At1g04920	Duplicate		2.36945	0.00321792	0.00134857	0.0239409		5.89259	0.08723	0.0148033	0.0501218		3.83734	2.69037	0.701102	0.42744		3.02415	0.156842	0.0518631	0.130957
261152_at	At1g04930	Unique		2.24791	0.00361765	0.001607	0.0267568		6.93936	0.0502099	0.00723553	0.0322906		4.3997	0.203648	0.0462867	0.102569		5.11125	0.0718173	0.0140508	0.0524309
261168_at	At1g04940	Unique		5.16364	0.0538711	0.010415	0.0449492		8.01349	0.0684969	0.0085477	0.0326598		6.01728	0.391136	0.0650021	0.103935		6.60787	0.364074	0.055097	0.0913131
261126_at	At1g04950	Unique		5.88586	0.0813001	0.0138119	0.0484435		8.43353	0.0214653	0.00254523	0.0173723		6.94806	0.116777	0.0168071	0.0491829		7.84209	0.0531137	0.0067729	0.0293881
261155_at	At1g04960	Unique		6.25543	0.0290393	0.00456992	0.0272418		9.286	0.00887995	0.000956273	0.0101479		8.45379	0.442742	0.052372	0.0787089		9.24072	0.0774073	0.00837675	0.0301082
261154_at	At1g04970	Unique		6.91995	0.064916	0.00939588	0.0368191		9.71866	0.0239884	0.00246828	0.0159365		8.42191	0.533901	0.0633942	0.08676		9.17442	0.14191	0.015468	0.0410608
261167_at	At1g04980	Duplicate		6.03611	0.15046	0.0246201	0.0642619		9.65819	0.133193	0.0137907	0.0377872		7.64995	0.366558	0.0479164	0.0791431		8.04807	0.530519	0.0659189	0.0905022
261179_at	At1g04985	Unique		7.60291	0.0783992	0.0102456	0.0368278		9.81395	0.0457425	0.00466097	0.021793		8.08989	0.44155	0.0545804	0.0821386		8.48788	0.0783344	0.00922898	0.0329744
261125_at	At1g04990	Duplicate		4.0279	0.123983	0.0303159	0.0874184		9.02265	0.0991232	0.010986	0.0348942		7.3615	0.661519	0.089862	0.110485		6.84581	1.22992	0.179661	0.162
265214_at	At1g05000	Duplicate		3.2274	0.187562	0.056653	0.13419		7.34571	0.019388	0.00263936	0.0189554		5.16031	4.69231	0.909308	0.419776		4.04464	1.11562	0.275827	0.261143
265194_at	At1g05010	Duplicate		10.8836	0.0560924	0.00508834	0.021761		12.8424	0.00486879	0.000379118	0.0054333		9.7574	5.43768	0.557288	0.238986		12.1564	0.173999	0.0143133	0.0343137
265213_at	At1g05020	Unique		2.24482	0.0073319	0.00326508	0.0381441		6.28872	0.0277123	0.00440667	0.0264712		3.46928	2.06962	0.596557	0.414674		4.0373	0.121431	0.0300772	0.0863124
265212_at	At1g05030	Unique		4.93974	0.0589958	0.0117873	0.0491707		8.84017	0.0742673	0.00840111	0.0308275		6.66707	0.216946	0.0325399	0.069862		7.86685	0.227882	0.0289674	0.0606812
265215_at	At1g05040	Unique		2.11575	0.000645997	0.000307906	0.012013		3.27227	0.358421	0.109533	0.182956		2.26022	0.512681	0.226828	0.316791		3.23734	0.0152408	0.00470782	0.0381343
265218_at	At1g05050			6.2945	0.0274818	0.00434047	0.0263367		8.6375	0.0137537	0.00159232	0.0135776		6.97054	0.206203	0.029582	0.065145		7.60318	0.0389514	0.00512305	0.0259577
265192_at	At1g05060	Unique		5.74665	0.021482	0.00365496	0.0255048		10.1765	0.0585101	0.00574954	0.0237694		7.24119	0.334882	0.0462468	0.0799164		7.47668	0.195182	0.0261055	0.0590896
265193_at	At1g05070	Duplicate		6.73589	0.084996	0.0127214	0.0432817		9.18761	0.0826452	0.00899529	0.0312901		8.1079	0.285719	0.0352396	0.0659267		8.67953	0.0684636	0.00788794	0.0301463
265217_s_at	At1g05090	Duplicate		5.06803	0.0131628	0.00260385	0.0226379		8.55626	0.134893	0.0157655	0.0429251		6.94225	0.140274	0.0202058	0.0539495		7.25125	0.100889	0.0139133	0.0438036
265216_at	At1g05100	Duplicate		2.49418	0.000202095	8.23319e-05	0.00569967		6.69662	0.467656	0.0698346	0.102119		4.54604	1.55124	0.341229	0.273972		5.46218	2.30646	0.422261	0.27804
265191_at	At1g05120	Unique		4.89587	0.0076992	0.00158937	0.0179222		7.86102	0.0498946	0.00634709	0.028415		6.92727	0.304928	0.0440185	0.0797143		7.13039	0.128877	0.0180743	0.0503471
264569_at	At1g05130			2.8613	0.00254322	0.000901983	0.017625		5.99425	0.0373321	0.00622799	0.0322334		2.98401	0.234657	0.0786381	0.162337		3.18697	0.0647139	0.0203058	0.0798217
264584_at	At1g05140	Duplicate		9.80483	0.0325022	0.0033223	0.0183873		10.9846	0.032908	0.00299583	0.0165145		9.17011	1.27288	0.138808	0.123032		10.6909	0.0851999	0.00796936	0.0273026
264568_at	At1g05150	Duplicate		7.07819	0.0374348	0.00523777	0.0273347		8.36424	0.0841183	0.0100569	0.0346752		8.49683	0.51954	0.0611451	0.0848306		9.33874	0.0794732	0.00851007	0.0301872
264586_at	At1g05160	Duplicate		4.94467	0.0372715	0.00765765	0.0390437		7.91713	0.0426961	0.00539287	0.0260991		6.36505	1.34031	0.210573	0.181887		6.28048	0.0548714	0.00873682	0.0372976
264583_at	At1g05170	Duplicate		3.70763	0.0542836	0.0144734	0.0628403		8.28568	0.0948504	0.0114475	0.0371699		7.13547	0.647525	0.0907473	0.112773		7.53095	0.667573	0.088644	0.108493
264585_at	At1g05180	Duplicate		7.7291	0.0234246	0.00302582	0.0198019		10.0764	0.0207422	0.00205848	0.0142929		8.78607	0.207006	0.0235607	0.0517841		9.22234	0.137849	0.0149473	0.0402588
264575_at	At1g05190	Unique		12.5097	0.00572384	0.000458952	0.00604781		12.9171	0.0274341	0.00212385	0.0128227		10.1217	4.93513	0.487577	0.21948		12.1194	0.10633	0.00877349	0.0269057
264587_at	At1g05200	Duplicate		6.31198	0.400209	0.0637734	0.100225		7.45989	0.545498	0.0731241	0.0990066		6.4716	2.31254	0.357337	0.234981		8.86392	0.239828	0.0270567	0.055249
264579_at	At1g05205	Unique		7.53907	0.0381732	0.00502777	0.0259156		9.95856	0.0783828	0.00787089	0.0281134		8.51173	0.417422	0.0490408	0.0759049		8.16801	0.0638788	0.00782061	0.030943
264581_at	At1g05210	Tandem Duplicate		5.93834	0.0554114	0.00928543	0.0396401		9.054	0.0276545	0.00305439	0.0183672		6.57094	2.65687	0.404336	0.24806		6.72546	0.516777	0.0768389	0.106888
264582_at	At1g05230	Duplicate		6.14502	0.0624492	0.0101201	0.0406668		8.46664	0.0220539	0.0026048	0.0175401		6.0366	2.25969	0.374331	0.249019		7.48163	0.174986	0.0233887	0.055912
264567_s_at	At1g05250	Tandem Duplicate		2.45546	1.1707	0.426117	0.440646		6.38588	0.0169723	0.00265778	0.0204009		3.28263	5.24645	1.59824	0.697767		3.70029	0.234954	0.0634962	0.130995
264577_at	At1g05260	Tandem Duplicate		3.22254	0.125335	0.0397517	0.109859		6.27244	0.0649922	0.0103616	0.0406438		5.36993	7.28396	1.35643	0.502591		3.92571	0.193755	0.0493555	0.112127
264566_at	At1g05270	Unique		5.50091	0.0416685	0.00776792	0.0371081		7.94707	0.0388712	0.00489127	0.0248089		6.81642	0.185687	0.0272411	0.063217		7.19559	0.0463271	0.00643826	0.0299124
264565_at	At1g05280	Unique		2.33256	0.000673742	0.000290808	0.0111279		4.85074	0.163235	0.0336516	0.0832912		3.26811	4.77036	1.45967	0.668312		2.52162	0.0126085	0.00500016	0.0445299
264564_at	At1g05290	Unique		2.7152	0.00192377	0.000715921	0.0161538		3.37877	0.35383	0.104722	0.176051		3.08117	0.538089	0.174638	0.238073		3.30629	0.0142628	0.00431384	0.0361211
264574_at	At1g05300	Duplicate		1.89301	0.000187256	9.92315e-05	0.00722876		8.87771	0.190308	0.0214366	0.0491392		3.68945	1.51651	0.411041	0.333781		4.05297	0.570057	0.140652	0.186288
264573_at	At1g05310	Unique		3.96105	0.0236838	0.00617221	0.0388522		6.08107	0.189567	0.0311733	0.0715981		5.50946	1.11857	0.203028	0.191966		6.33997	0.187837	0.0296274	0.0683601
264572_at	At1g05320	Unique		6.56454	0.0510382	0.00771843	0.0344147		7.6812	0.0599472	0.00780441	0.0318754		8.15436	0.516145	0.0632968	0.0881041		8.19332	0.138335	0.0168839	0.0453949
264571_at	At1g05330	Unique		2.52163	0.000934428	0.000373271	0.0121225		5.04012	0.108914	0.0216095	0.0654789		2.85962	0.230071	0.0804549	0.167734		2.66614	0.0219943	0.00824948	0.0556252
264580_at	At1g05340	Duplicate		2.87821	0.0436304	0.0151994	0.0725725		10.2729	0.287876	0.0280229	0.0522287		7.47258	9.45868	1.26579	0.411571		6.76877	4.89612	0.72334	0.326901
264570_at	At1g05350	Unique		6.29126	0.14683	0.0233369	0.0609075		9.00846	0.0185331	0.0020573	0.0151121		7.82684	0.291143	0.0371981	0.0689394		7.89185	0.0632157	0.00801025	0.0318591
264576_at	At1g05360	Duplicate		3.76878	0.0228435	0.00614315	0.0401034		8.22663	0.0336708	0.0040929	0.0223051		6.62043	0.58613	0.0885335	0.115641		7.30463	0.0568693	0.00778538	0.0326468
264578_at	At1g05370	Unique		1.5252	8.86726e-05	5.81525e-05	0.00617402		3.8105	0.106723	0.0280076	0.0857328		2.48565	0.494299	0.198861	0.28285		1.99316	0.00236122	0.00118466	0.0243796
261383_at	At1g05380	Unique		6.54332	0.0222858	0.00344659	0.0228148		9.02351	0.0212251	0.0023522	0.0161454		8.11668	0.302748	0.0372996	0.0677896		9.38905	0.0491581	0.00523568	0.0236143
261388_at	At1g05385	Unique		8.26037	0.0581615	0.00707784	0.0291957		9.60313	0.085787	0.00893324	0.0304999		7.69759	0.871211	0.11318	0.121257		9.05263	0.365206	0.0403426	0.0667566
261380_at	At1g05400	Unique		3.35903	0.00204837	0.000614357	0.0134738		5.24396	0.28244	0.05386	0.101345		5.21314	0.186763	0.0358254	0.0828983		5.55767	0.0258779	0.00465625	0.0289449
261387_at	At1g05410	Unique		5.41981	0.0497404	0.00928051	0.0411501		7.29303	0.019669	0.00269695	0.0192301		6.87119	0.395633	0.0575786	0.0915407		7.45394	0.0930941	0.0124892	0.0409331
261386_at	At1g05430	Unique		6.80368	0.261582	0.0390134	0.0751728		9.41227	0.0930139	0.0098822	0.0324026		7.7959	0.12955	0.0166178	0.0461693		8.3584	0.0387959	0.00464155	0.0235651
261384_at	At1g05440	Unique		2.52814	0.0371594	0.0144442	0.0762487		5.73232	0.0964003	0.016817	0.0541638		4.01741	2.19117	0.545418	0.368461		4.2135	0.32826	0.0779067	0.135977
261385_at	At1g05450	Unique		2.61661	0.000577398	0.000222086	0.0091833		5.29176	0.0292579	0.00552896	0.0323238		4.48745	5.64466	1.25788	0.529443		3.79234	0.0504706	0.0133086	0.0592396
261381_at	At1g05460	Unique		4.74668	0.0232061	0.00483909	0.0320931		5.58556	0.230976	0.0413524	0.0860434		6.41192	0.516617	0.0805714	0.112098		7.06947	0.136552	0.0193157	0.0522711
261382_at	At1g05470	Duplicate		3.92408	0.021145	0.00536964	0.0370567		5.97767	0.0486006	0.00813036	0.0368798		5.4384	0.89046	0.163736	0.173515		5.77419	0.250445	0.0433731	0.0866692
263204_at	At1g05480	Unique		2.62966	0.00168958	0.000648695	0.0156311		4.36033	0.278795	0.063939	0.121094		5.20176	3.55978	0.684341	0.362711		4.52798	0.102103	0.0225493	0.0705691
263203_at	At1g05490	Unique		2.04243	0.000494595	0.000243586	0.0108888		4.30536	0.250744	0.05824	0.116307		3.19635	0.864105	0.270342	0.290824		2.86524	0.0129379	0.00451548	0.0396983
263205_at	At1g05500	Duplicate		6.51235	0.0114534	0.00175174	0.0164335		8.93029	0.0539649	0.0060429	0.026013		7.69921	0.198272	0.0257522	0.0578341		8.01632	0.0372512	0.00464692	0.0240766
263175_at	At1g05510	Duplicate		1.71937	0.848784	0.44321	0.535834		3.40018	0.102692	0.030202	0.094247		2.94557	9.39795	3.19053	1.04075		2.15957	0.720198	0.333492	0.39297
263185_at	At1g05520	Duplicate		6.21324	0.129291	0.019978	0.0578716		9.37696	0.0337886	0.00360336	0.019603		7.53571	0.188865	0.0250627	0.0576703		8.03199	0.0847322	0.0105493	0.0362411
263176_at	At1g05530	Duplicate		3.18484	0.00473467	0.00151357	0.0216051		4.12244	0.274646	0.066622	0.127125		4.47472	0.262216	0.0585995	0.114436		5.41979	0.0590942	0.0109034	0.0448528
263177_at	At1g05540	Unique		5.20977	0.306034	0.0606653	0.106186		7.53517	0.045424	0.00602826	0.0282846		6.2507	1.02224	0.16354	0.161751		6.57164	0.370573	0.0563897	0.0926325
263178_at	At1g05550	Unique		2.11589	0.000379808	0.00018041	0.0092106		6.25206	0.0358483	0.00573384	0.0302839		2.29624	0.0237749	0.0103538	0.0671493		2.2838	0.00800509	0.00350517	0.0391765
263184_at	At1g05560	Duplicate		6.49003	0.19612	0.0307387	0.0682362		8.90596	0.187531	0.0210568	0.0486246		7.61169	1.75276	0.230273	0.173932		9.09957	1.02634	0.11279	0.111333
263183_at	At1g05570	Duplicate		5.69417	0.0591001	0.010437	0.0426937		9.94864	0.0510251	0.00512886	0.0227054		7.73035	1.69333	0.21905	0.168334		7.84599	0.394522	0.0502832	0.0800548
263182_at	At1g05575	Unique		2.24543	0.0552017	0.0261516	0.104635		8.59054	0.478984	0.0557572	0.0805638		5.34155	7.4004	1.38544	0.509284		5.2557	5.0589	0.962555	0.427955
263233_at	At1g05580	Unique		2.35097	0.000676003	0.000289273	0.0110593		2.76164	0.0985069	0.0356697	0.113649		2.87519	1.24172	0.431875	0.387566		2.90452	0.0098309	0.00338469	0.0341367
263199_at	At1g05590	Unique		4.59536	0.0637722	0.0136839	0.0549536		7.62748	0.0570616	0.00748106	0.0313178		5.98935	0.412465	0.0688664	0.107229		6.55113	0.181056	0.0276374	0.0649517
263200_at	At1g05600	Unique		5.83237	0.0566562	0.00979244	0.0408111		7.89849	0.0127012	0.00160806	0.0142685		7.00981	0.275441	0.0392937	0.0748701		8.07323	0.0977172	0.0121039	0.0387202
263201_at	At1g05610	Unique		2.72604	0.00594844	0.00220576	0.0282924		4.89997	0.0571276	0.0116588	0.0487786		3.46946	0.128761	0.0371127	0.103426		3.72993	0.0359613	0.00964127	0.0508413
263180_at	At1g05620	Duplicate		6.30629	0.0483571	0.00759458	0.0348703		9.41637	0.0219219	0.00232806	0.0157237		7.97798	0.735744	0.0922218	0.107515		7.12133	0.234906	0.0329863	0.0680591
263202_at	At1g05630	Unique		3.58577	0.0424903	0.0116984	0.057486		7.69751	0.0557649	0.00724454	0.0306782		6.08534	1.1788	0.193711	0.178416		6.65341	0.2297	0.0345236	0.0720337
263229_s_at	At1g05650	Tandem Duplicate		2.7892	0.00252873	0.00093838	0.018029		3.6173	0.114698	0.0317083	0.0936255		3.82948	1.33977	0.349856	0.302256		3.66387	0.0203877	0.00556452	0.0389712
263230_at	At1g05670	Unique		3.25572	0.00660636	0.00202587	0.0249652		5.554	0.0737301	0.0132751	0.0488896		4.22498	0.187263	0.0443227	0.102424		5.27302	0.230551	0.0437228	0.0910593
263231_at	At1g05680	Duplicate		2.71188	0.0260656	0.0098834	0.0595338		11.166	0.256754	0.0229944	0.0453798		4.62174	5.01919	1.08599	0.484742		5.29428	4.43636	0.837953	0.397838
257451_at	At1g05690	Unique		4.86872	0.13478	0.0268099	0.0754048		7.84507	0.0336744	0.00429243	0.0233912		5.09387	0.714479	0.140262	0.165938		6.16514	0.30865	0.0500637	0.0901136
263232_at	At1g05700	Duplicate		2.44121	0.000679747	0.00028005	0.0106799		5.19519	0.0615772	0.0118527	0.0477648		2.8615	1.30877	0.457373	0.399796		3.24365	0.0268697	0.0082838	0.0505357
263179_at	At1g05710	Duplicate		4.47711	0.222639	0.0504281	0.105391		6.78854	0.240479	0.0354242	0.0722374		7.56186	2.04164	0.269992	0.188956		6.30724	0.74866	0.118698	0.137184
263181_at	At1g05720	Unique		7.67291	0.135533	0.0176158	0.0479803		10.8927	0.0466439	0.00428214	0.0198273		9.00298	0.412593	0.0458285	0.0713468		8.69184	0.140472	0.0161614	0.0431205
257452_at	At1g05740	Unique		3.18047	0.00227546	0.000721995	0.0149983		5.366	0.141063	0.0262884	0.0699933		3.68521	0.0861866	0.0233872	0.0796632		3.81921	0.0537349	0.0140696	0.0606952
261310_at	At1g05750	Unique		2.578	0.0111155	0.00426397	0.0408962		6.9859	0.12738	0.0182339	0.0510892		4.62723	0.126307	0.0272964	0.0768055		5.099	0.0768759	0.0150767	0.0543763
261256_at	At1g05760	Tandem Duplicate		4.09452	0.0543259	0.0131663	0.0569247		7.50417	0.0352946	0.00470333	0.0250352		5.62574	1.04422	0.185615	0.181642		5.61801	0.119404	0.0212539	0.0615074
261311_at	At1g05770	Tandem Duplicate		2.06698	0.00142214	0.000689311	0.0182446		4.03555	0.328011	0.0812804	0.141919		3.39333	0.415551	0.122461	0.18997		3.7164	0.0924589	0.0248786	0.0818186
261312_at	At1g05790	Unique		5.85515	0.0231355	0.00388164	0.0259777		8.79727	0.0480025	0.00545652	0.0249049		7.55218	0.529986	0.0701765	0.0963961		7.36803	0.094345	0.0128046	0.0416877
261278_at	At1g05800	Duplicate		2.10898	0.000393967	0.000187739	0.00941146		4.46057	0.216748	0.0485919	0.104373		1.99592	0.0164235	0.00822857	0.0642083		2.03188	0.0028499	0.00140259	0.0262735
261254_at	At1g05805	Unique		5.93329	0.16229	0.026419	0.0678969		9.76086	0.0215841	0.00221129	0.0150515		7.51068	1.09116	0.145282	0.13908		7.98956	0.835924	0.104627	0.114435
261252_at	At1g05810	Unique		5.61957	0.0141091	0.00253147	0.0211371		8.1879	0.0620921	0.0075834	0.0304331		6.8683	0.771749	0.112364	0.127905		6.37444	0.249738	0.0391781	0.0783972
261253_at	At1g05840	Duplicate		3.62429	0.200104	0.0548013	0.123426		8.71231	0.0628277	0.00721137	0.0287702		7.77758	0.356541	0.0458421	0.0767733		7.93649	0.11914	0.0150117	0.0434911
261279_at	At1g05850	Unique		11.5986	0.0105958	0.000904865	0.00887484		13.0133	0.0134698	0.00103508	0.00891853		11.9484	0.700977	0.0586673	0.0700719		12.4778	0.148583	0.0119078	0.0308921
261280_at	At1g05860	Duplicate		3.75052	0.0266423	0.00695427	0.0435205		6.48034	0.0137547	0.00212253	0.0180979		5.29834	0.160612	0.0303137	0.0756397		6.10793	0.261843	0.0428693	0.0837772
261249_at	At1g05880	Unique		2.59059	0.0013917	0.000539918	0.0144004		6.95701	0.311104	0.0447181	0.0801734		3.90643	0.157138	0.0402254	0.101475		4.80547	0.735259	0.153004	0.178437
261250_at	At1g05890	Duplicate		5.55714	0.0258389	0.00468221	0.0289258		8.16717	0.0153021	0.00187362	0.0151462		8.11248	0.271088	0.0334161	0.0641802		8.62756	0.132222	0.0153255	0.0421467
261255_at	At1g05900	Duplicate		5.86973	0.286562	0.048524	0.0911993		7.03216	0.0391173	0.00556263	0.0281252		5.78496	0.446223	0.077135	0.115472		7.1641	0.108248	0.0151098	0.0459249
261257_at	At1g05910	Unique		6.91411	0.0142714	0.00204077	0.0172782		8.74692	0.103351	0.0118157	0.0367539		7.74013	0.397059	0.0512987	0.0814103		8.23078	0.0779382	0.00946911	0.0339183
261251_at	At1g05920	Unique		2.09341	0.000396851	0.000190371	0.00951609		3.80915	0.0928737	0.0243817	0.0800052		2.30449	0.0698173	0.0302963	0.114659		2.48072	0.0543902	0.0219252	0.0940119
260927_at	At1g05940	Unique		8.01646	0.0538519	0.00673213	0.028948		10.7999	0.0176536	0.00163461	0.0123026		8.47013	0.158604	0.0187251	0.0470183		9.06904	0.0957162	0.0105542	0.0341139
260945_at	At1g05950	Unique		2.25912	0.0675628	0.028442	0.115057		4.44411	0.759155	0.170823	0.196056		4.08375	1.34224	0.328679	0.283698		4.2243	0.063802	0.0151036	0.0597947
260961_at	At1g05960	Unique		6.128	0.0749788	0.0119485	0.0446839		8.50965	0.0482371	0.00566851	0.0258094		7.282	0.667527	0.091668	0.112198		7.66534	0.170967	0.0223039	0.0539418
260960_at	At1g05990	Duplicate		3.25551	0.00298322	0.00092798	0.0167774		4.5187	0.155563	0.0344264	0.0872849		4.19365	0.199735	0.0476281	0.10657		4.70878	0.0419459	0.00890802	0.0434947
260955_at	At1g06000	Unique		9.17183	0.374142	0.0408739	0.0666903		9.55291	0.180899	0.0189365	0.0445228		8.87899	2.74658	0.309335	0.186652		8.88532	0.966535	0.108779	0.110646
260946_at	At1g06010	Unique		6.76323	0.0986661	0.0147007	0.0464441		9.30501	0.0186022	0.00199916	0.0146577		8.26613	0.638252	0.077213	0.0966483		8.37426	0.0452536	0.00540389	0.0254027
260947_at	At1g06020	Tandem Duplicate		2.42628	0.000447961	0.000186161	0.00872326		3.33532	0.483541	0.144976	0.208487		3.68019	0.178969	0.0486304	0.114953		3.69216	0.02068	0.00560106	0.0389488
260956_at	At1g06040	Duplicate		9.44801	0.430767	0.0447812	0.0694674		12.3514	0.0261359	0.00211603	0.0130889		10.457	0.860839	0.0823222	0.088727		11.8791	0.637292	0.0536482	0.0672026
260959_at	At1g06050	Unique		3.74462	0.0470917	0.0128164	0.0579515		8.54037	0.00894312	0.00104716	0.0110731		6.25956	0.816058	0.13037	0.144317		6.05619	0.335524	0.0554018	0.095645
260958_at	At1g06060	Unique		6.74768	0.0118187	0.00174742	0.0161113		9.31828	0.0325319	0.00349119	0.0193561		8.20052	0.170275	0.020764	0.0503193		8.21581	0.0501816	0.00610794	0.027266
260953_at	At1g06070	Unique		5.45031	0.0117679	0.00213385	0.0199034		8.69045	0.0305177	0.00351164	0.0201017		7.21747	0.316953	0.0439146	0.0780031		7.76958	0.0766944	0.00987111	0.0356438
260957_at	At1g06080	Tandem Duplicate		4.59803	0.0920779	0.0192903	0.0659942		7.78043	0.242622	0.0311836	0.0633084		6.50507	4.28655	0.658956	0.318275		7.40671	1.79944	0.242947	0.18111
260948_at	At1g06100	Tandem Duplicate		5.07344	0.948888	0.181858	0.192002		7.41845	0.344629	0.0464556	0.0791339		5.24625	2.5083	0.478114	0.301885		6.94274	0.327472	0.0471676	0.0824246
260949_at	At1g06110	Unique		6.79833	0.019448	0.00290682	0.0205133		9.70177	0.00605767	0.000624388	0.00802236		8.12932	0.302749	0.0372416	0.0676841		8.74469	0.186207	0.0212937	0.0493462
260950_s_at	At1g06120	Duplicate		3.05458	0.0168155	0.00551991	0.0424524		6.33146	0.267121	0.0421895	0.0816301		4.74535	3.55126	0.748367	0.397121		4.51348	0.163163	0.0361502	0.0894952
260954_at	At1g06130	Duplicate		6.62615	0.00978509	0.00147216	0.0149287		9.03302	0.0482788	0.0053447	0.0243246		7.47197	0.181427	0.0242811	0.0570055		8.08495	0.0942552	0.0116581	0.037973
260952_at	At1g06140	Unique		2.29277	0.000788881	0.000348454	0.0122503		6.02667	0.0399745	0.00663294	0.0331753		3.63176	0.0867475	0.0238858	0.0810982		3.31663	0.0302634	0.00912472	0.0524519
260951_at	At1g06150	Unique		2.7968	0.0198247	0.00702495	0.0503433		6.83042	0.0480532	0.00703517	0.0320932		4.38711	0.170183	0.0387916	0.0940328		4.71772	0.099197	0.0210265	0.0667601
260783_at	At1g06160	Unique		3.00133	0.00193072	0.000642902	0.0146401		7.654	1.01881	0.133108	0.131873		4.5402	1.54721	0.340781	0.273968		5.62688	1.1049	0.196361	0.186807
257491_at	At1g06170	Duplicate		2.79474	0.00250135	0.000904909	0.0178956		2.96392	0.270258	0.0911827	0.175397		4.11003	1.24639	0.303257	0.271633		4.30275	0.0557399	0.0129545	0.0548702
260784_at	At1g06180	Duplicate		5.00426	0.263346	0.0522429	0.102547		7.90628	0.0359482	0.00454679	0.023981		6.05951	1.45051	0.239377	0.198757		6.31353	0.982665	0.155644	0.157011
260793_at	At1g06190	Unique		9.41253	0.0320958	0.00341871	0.0190335		10.8012	0.0497907	0.00460974	0.0206587		8.29583	1.5534	0.187251	0.150239		9.3497	0.125482	0.013421	0.0378873
260785_at	At1g06200	Duplicate		8.99031	0.036085	0.00400535	0.0211295		10.9303	0.12853	0.0117591	0.0327997		9.75954	0.17882	0.0183226	0.043329		10.3656	0.0690163	0.00665823	0.0253445
260794_at	At1g06210	Unique		6.56073	0.0570397	0.00850429	0.036403		9.04963	0.0421013	0.00465227	0.0226734		8.02293	0.260047	0.0324129	0.0635613		8.53169	0.160089	0.018764	0.046897
260786_s_at	At1g06220	Duplicate		9.16751	0.0105961	0.00116299	0.0112285		9.75124	0.0319914	0.00328076	0.0183424		9.32332	0.436703	0.0468399	0.0708798		10.3243	0.109417	0.010598	0.0320391
260795_at	At1g06225	Duplicate		2.99696	0.00432862	0.00145852	0.021953		3.58101	0.213954	0.0597467	0.129168		3.9277	0.157879	0.0401963	0.101164		4.13284	0.031023	0.00750646	0.042618
260787_at	At1g06230	Unique		6.16914	0.0293407	0.00476711	0.0277658		8.13827	0.05978	0.00734554	0.0300432		8.24127	0.508423	0.0616923	0.0865204		8.06025	0.0610408	0.00757306	0.0306522
260790_at	At1g06240	Unique		6.57249	0.0492679	0.00746985	0.0337717		8.83535	0.0387647	0.00438745	0.0222841		6.32198	0.494669	0.0782459	0.111251		7.73942	0.146017	0.0188667	0.0493734
260791_at	At1g06250	Duplicate		2.31252	0.00134836	0.000586209	0.0158788		5.27212	0.0282508	0.00535853	0.0318809		3.34331	1.30695	0.390914	0.341942		3.12253	0.0405063	0.0129723	0.0644547
260788_at	At1g06260	Unique		2.34955	0.000897752	0.000386561	0.0127524		6.03867	0.0186368	0.00308624	0.0226071		4.33167	3.05013	0.704147	0.403185		4.11465	0.0300308	0.00729851	0.0421164
260792_at	At1g06270	Unique		3.55843	0.0201509	0.00575866	0.0398923		6.70787	0.124461	0.0185545	0.0525935		5.35001	0.158225	0.0295748	0.0743505		5.52161	0.0499033	0.00903782	0.0404575
260789_s_at	At1g06290	Tandem Duplicate		8.09882	0.0656772	0.00789473	0.0316436		10.6264	0.00796836	0.000749866	0.00840038		9.98358	0.305109	0.0305611	0.0553275		10.5607	0.088941	0.00842191	0.0282397
259419_at	At1g06310	Tandem Duplicate		2.63304	0.00164523	0.000629761	0.0154048		5.46556	0.017163	0.00314021	0.0239697		2.79822	0.101953	0.0364348	0.114108		3.38249	0.0250298	0.00739983	0.0467727
259389_at	At1g06320	Unique		2.21602	0.00123803	0.000581128	0.0158778		6.21251	0.0891626	0.0143521	0.0480645		3.69229	0.185153	0.0501458	0.116538		3.56672	0.0115666	0.00324292	0.0301532
259390_at	At1g06340	Unique		1.96307	0.000370851	0.000190586	0.00980987		3.23924	0.0250615	0.00773686	0.0488721		2.81338	0.132457	0.0470811	0.129363		2.93588	0.0273637	0.00932042	0.0563441
259391_s_at	At1g06350	Tandem Duplicate		9.50306	0.154613	0.0163626	0.0413771		9.81184	0.130285	0.0132784	0.0367873		7.7749	6.5426	0.841502	0.328988		9.12898	0.523319	0.057325	0.079243
259392_at	At1g06380	Unique		6.31866	0.0901779	0.0145668	0.0475253		8.42505	0.030492	0.0036192	0.0207262		6.6159	0.223116	0.0337242	0.0713964		7.6513	0.238044	0.0311115	0.0637666
259396_at	At1g06390	Duplicate		7.89519	0.0271354	0.00345547	0.0208644		8.88043	0.101111	0.0113858	0.0358068		8.22723	0.245703	0.0298646	0.0602492		9.74318	0.0793987	0.00814915	0.0289205
259395_at	At1g06400	Duplicate		7.96114	0.0498605	0.00630524	0.0280481		10.2378	0.00661813	0.00064644	0.00794622		9.48292	0.757998	0.079933	0.0918104		9.71557	0.123604	0.0127223	0.0361866
259393_at	At1g06410	Duplicate		9.31871	0.0729108	0.00789043	0.0289761		9.68579	0.0444063	0.00458469	0.0217564		10.2047	0.143563	0.0140683	0.0371296		11.0255	0.0728363	0.00660614	0.0244779
259394_at	At1g06420	Unique		3.7732	0.0270853	0.00716644	0.0436171		4.28933	0.21371	0.0498237	0.107776		6.13451	2.7111	0.441942	0.268406		6.32036	0.126724	0.0200502	0.0563233
262626_at	At1g06430	Duplicate		9.07653	0.0512497	0.0056748	0.0249417		9.64564	0.0971771	0.0100747	0.0323185		9.26571	2.63563	0.28445	0.175212		11.3558	0.30653	0.0269932	0.0487549
262625_at	At1g06440	Unique		2.19429	0.000304932	0.000139512	0.00795808		6.08758	0.0376343	0.00618214	0.0318674		2.8209	0.0360622	0.0127839	0.067319		4.51435	0.0211104	0.00467629	0.032185
262624_at	At1g06450	Unique		3.63101	0.0499087	0.0139141	0.0615263		6.84248	0.0207857	0.00303775	0.0210702		5.48014	1.09019	0.198934	0.190528		5.77159	0.252682	0.0437804	0.0870948
262629_at	At1g06460	Unique		10.1135	0.284431	0.0275924	0.0527336		13.1034	0.0133695	0.00102031	0.00882419		8.66257	6.77446	0.782038	0.300463		11.0008	1.01994	0.0927148	0.0918043
262623_at	At1g06470	Unique		6.77009	0.0394899	0.0057289	0.0293528		9.65381	0.0315433	0.00326745	0.0183974		7.5832	0.242764	0.0320133	0.064974		8.32609	0.13214	0.0158706	0.0436593
262628_at	At1g06490	Duplicate		1.85072	0.000368928	0.000199323	0.0103784		6.76521	0.0250051	0.00369613	0.023374		4.36512	0.611664	0.140126	0.179168		4.684	0.110728	0.0236396	0.0710414
262631_at	At1g06500	Unique		6.23469	0.053519	0.00833633	0.0371056		8.22233	0.0186411	0.00226713	0.0166051		7.93226	0.347176	0.0437675	0.0742809		8.49323	0.0861828	0.0101472	0.0345651
262622_at	At1g06510	Unique		7.51338	0.0429485	0.00565353	0.0275828		9.1753	0.00973939	0.00106148	0.0107559		7.30457	0.904033	0.123763	0.130166		8.54317	0.11755	0.0137595	0.0401321
262630_at	At1g06520	Unique		2.57297	0.00092883	0.00036278	0.011845		6.32458	0.117461	0.0185722	0.0541896		5.39957	4.83972	0.896315	0.407428		3.82303	0.286467	0.0749319	0.14
262621_at	At1g06530	Unique		8.76741	0.0278687	0.00320534	0.0190409		10.4123	0.111917	0.0107486	0.0321294		10.0724	0.141407	0.014039	0.0373337		11.183	0.100542	0.00899055	0.0283539
262620_at	At1g06540	Unique		2.19126	0.00775733	0.00351743	0.040194		3.43177	0.0287154	0.00836752	0.0493787		3.23105	2.10375	0.651104	0.448904		3.1677	0.0731892	0.0231048	0.0854042
262619_at	At1g06550	Unique		7.7382	0.161203	0.0202399	0.0518856		7.61053	0.155593	0.0204444	0.0518298		8.42169	1.4751	0.175155	0.144215		8.69548	0.2211	0.025427	0.0540755
262618_at	At1g06560	Unique		6.40623	0.0455064	0.0071401	0.0332992		8.6656	0.0057102	0.00065895	0.00872021		6.69854	0.645853	0.0964171	0.119974		6.76031	0.125564	0.0185737	0.0524162
262635_at	At1g06570	Unique		6.51316	0.43265	0.0660358	0.10099		9.21368	0.0147059	0.00159609	0.0131617		8.0838	2.24202	0.277348	0.185227		9.97157	1.04299	0.104596	0.102418
262627_at	At1g06580	Duplicate		3.0569	0.00234541	0.000786012	0.0158427		3.5779	0.0710015	0.0198444	0.0744741		5.32389	0.100816	0.0189365	0.0596397		5.66715	0.0616728	0.0108825	0.0438209
262617_at	At1g06590	Unique		2.1971	0.0096946	0.00430576	0.0448141		6.75689	0.0324629	0.00480442	0.0266653		4.89298	0.658825	0.134647	0.165887		5.43428	0.172944	0.0318247	0.0765264
262616_at	At1g06620	Duplicate		2.39237	0.00341943	0.00147246	0.0244427		7.84846	0.080641	0.0102748	0.0361821		5.07239	1.96079	0.386562	0.27606		4.56844	1.03563	0.226691	0.222758
262633_at	At1g06630	Unique		4.42705	0.345101	0.0794943	0.132696		8.17227	0.00527058	0.000644935	0.00888355		6.87304	0.312312	0.0454402	0.0813104		6.99716	0.147515	0.0210821	0.0548903
262637_at	At1g06640	Tandem Duplicate		6.37374	2.67729	0.439925	0.256716		9.74784	0.772234	0.079221	0.0901501		9.71311	2.28063	0.2348	0.155478		10.7302	0.324033	0.0301981	0.05305
262638_at	At1g06650	Tandem Duplicate		8.41379	0.0254177	0.00297469	0.0189486		10.5073	0.0472937	0.00450104	0.0206972		8.57133	1.74897	0.204049	0.154292		10.613	0.0633409	0.00596824	0.023714
262636_at	At1g06670	Unique		7.20483	0.0722172	0.0100913	0.037299		7.93626	0.0632885	0.0079746	0.0316991		7.6739	0.241459	0.0314649	0.0640332		8.93966	0.0866026	0.00968746	0.0329188
262632_at	At1g06680	Duplicate		13.6474	0.0024529	0.000180184	0.00362902		14.1479	0.0190938	0.00134958	0.00976681		12.1102	5.3339	0.440447	0.190709		14.3926	0.0453044	0.00314774	0.0147887
262634_at	At1g06690	Unique		8.67495	0.208982	0.0244209	0.0526972		9.48971	0.19385	0.0204274	0.0463959		8.1787	1.26451	0.15461	0.137492		9.41141	0.257634	0.0273746	0.053932
260835_at	At1g06700	Duplicate		8.28269	0.0256031	0.00306247	0.0193186		10.3782	0.0642721	0.00619299	0.024428		9.4095	0.392356	0.0416978	0.0665692		9.43226	0.069725	0.00739218	0.0279949
260826_at	At1g06710	Unique		2.86996	0.00698562	0.00243525	0.0291224		6.04011	0.0380059	0.00629226	0.0322761		4.42331	0.248754	0.0562371	0.112755		5.36724	0.0943385	0.0175767	0.057226
260824_at	At1g06720	Unique		7.03252	0.0201333	0.00287671	0.0201765		8.08823	0.268117	0.033149	0.0640189		7.11057	0.597332	0.0840062	0.108693		7.59617	0.303897	0.0400066	0.0725719
260834_at	At1g06730	Unique		6.24369	0.0285527	0.00461794	0.0270634		7.71384	0.00569906	0.000738809	0.00978658		6.35723	0.309004	0.0486067	0.0874408		7.39989	0.0668579	0.00903499	0.0349423
260827_at	At1g06740			3.68371	0.0113649	0.00311914	0.0289399		7.33966	0.0102022	0.00139	0.0137616		5.89375	0.200975	0.0340997	0.076064		6.31315	0.0231925	0.00367368	0.0241228
260828_at	At1g06750	Duplicate		2.36182	0.00067977	0.000289595	0.0110391		2.41684	0.119408	0.0494068	0.142978		2.15454	1.52824	0.709313	0.573776		1.92948	0.00771531	0.00399866	0.0455237
260830_at	At1g06760	Unique		9.10201	0.0620291	0.00674445	0.0273628		11.2546	0.00737833	0.000655584	0.00763219		10.4475	0.652548	0.0624595	0.0773201		10.9153	0.281687	0.0258066	0.0486237
260823_at	At1g06770	Duplicate		3.26071	0.0193693	0.00589006	0.0426821		7.366	0.0121299	0.00164674	0.0149519		6.44258	0.699883	0.108634	0.129853		6.47543	0.149809	0.023135	0.0597724
260832_at	At1g06780	Duplicate		5.68123	0.0733781	0.01272	0.0476805		8.35904	0.0113967	0.0013634	0.0127713		7.73674	0.684789	0.0885112	0.10696		8.22222	0.401845	0.048873	0.0770974
260822_at	At1g06790	Unique		6.6214	0.0455661	0.00698551	0.0322382		8.89005	0.00578824	0.000651092	0.00855794		7.15549	0.174511	0.0243884	0.058381		7.60254	0.106842	0.0140535	0.0429946
260833_at	At1g06800	Duplicate		2.11987	0.00107366	0.000504731	0.0154569		6.1619	0.0879053	0.0142659	0.0481164		4.06655	0.311412	0.076579	0.137228		4.13978	0.107505	0.0259687	0.079202
260825_at	At1g06810	Unique		2.58408	0.00198277	0.000770253	0.0172318		5.05237	0.0707699	0.0140073	0.0526537		2.59456	0.0812628	0.0313205	0.109871		2.73642	0.0205075	0.00749426	0.0523327
260821_at	At1g06820	Unique		7.98139	0.0205103	0.00254821	0.0179435		9.32802	0.0240704	0.00258044	0.0166323		7.82364	0.437816	0.0559607	0.0845741		9.33188	0.047618	0.00510272	0.0233839
260831_at	At1g06830	Duplicate		8.46187	0.101637	0.0120657	0.0376755		8.6908	0.215607	0.0248086	0.0534283		6.94676	4.56287	0.656835	0.307494		7.96062	2.40211	0.30175	0.194693
260820_at	At1g06840	Unique		3.88083	0.00205665	0.000543417	0.0116857		7.46279	0.031772	0.00425738	0.0238847		5.86873	1.07945	0.183933	0.177035		6.13799	0.139635	0.0227493	0.0608795
260819_at	At1g06850	Unique		2.52749	0.0843475	0.0352079	0.114907		7.4049	0.043064	0.0058156	0.0280245		6.42942	0.718108	0.111691	0.131802		6.68623	0.182792	0.0273385	0.0639436
260829_s_at	At1g06870	Duplicate		7.80546	0.0963713	0.0123426	0.0397718		10.9377	0.035851	0.00327774	0.0173111		9.5051	0.701662	0.0738195	0.0881267		10.2706	0.226034	0.0220079	0.0462905
260818_at	At1g06890	Unique		7.99459	0.0317838	0.00397166	0.0223001		10.4989	0.0174385	0.00166098	0.012578		9.3788	0.36	0.0383844	0.063974		8.97572	0.298639	0.0332719	0.0608841
260817_at	At1g06900	Unique		8.14336	0.062603	0.0077082	0.0307251		9.35418	0.0601578	0.00643112	0.0262205		8.22346	0.211341	0.0256998	0.0559033		9.00953	0.0522762	0.00580233	0.0253776
260816_at	At1g06930	Unique		2.33073	0.00278841	0.00119986	0.0226562		7.42927	0.026112	0.00351475	0.0217507		4.17812	0.645601	0.15452	0.19231		4.91968	0.0803021	0.0163226	0.0576005
260815_at	At1g06950	Unique		10.6355	0.0274038	0.00256592	0.0155649		10.2494	0.0789985	0.00770765	0.0274228		9.21572	0.988666	0.10728	0.107894		10.2948	0.19196	0.0186463	0.0425586
256052_at	At1g06960	Duplicate		6.27412	0.0364181	0.00568744	0.0304163		8.61915	0.0345773	0.00401168	0.021574		6.91964	0.501797	0.0725177	0.102372		7.27861	0.110195	0.0151396	0.0456071
256051_at	At1g06970	Duplicate		2.35112	0.00188022	0.000806216	0.0184429		4.14811	0.08966	0.0216147	0.0721853		3.5273	1.22062	0.346048	0.313218		3.48719	0.0460962	0.0132187	0.0615682
256066_at	At1g06980	Duplicate		4.85013	0.0744102	0.0151801	0.0562423		7.16226	0.122029	0.0170377	0.0487732		4.37325	0.351733	0.0804283	0.135613		5.62033	0.280099	0.0498368	0.0941659
256059_at	At1g06990	Duplicate		2.30568	0.000535234	0.000233119	0.010034		3.63279	0.440029	0.121127	0.1826		3.0446	1.7659	0.580012	0.436469		2.82382	0.011196	0.00396483	0.0374709
256050_at	At1g07000	Duplicate		3.27739	0.0328381	0.0103787	0.0552917		10.2528	0.123255	0.0120215	0.0342419		7.57839	3.28716	0.433755	0.23924		8.01075	0.962056	0.120096	0.122441
256049_at	At1g07010	Unique		9.37777	0.0853703	0.00916044	0.0311569		9.41527	0.0726343	0.00771451	0.0286245		8.1335	2.30356	0.283219	0.186605		10.2178	0.476082	0.0465932	0.0675276
256064_at	At1g07020	Unique		5.20061	0.0155645	0.00299158	0.0239891		9.00511	0.0958912	0.0106485	0.0343875		7.14124	0.320632	0.0448985	0.079292		7.16874	0.171316	0.0238977	0.0577373
256048_at	At1g07025	Unique		1.62069	0.000158233	9.78782e-05	0.00776156		5.62632	0.0969383	0.0172294	0.055338		1.57142	0.0490887	0.0312384	0.140993		1.89695	0.00180164	0.000949755	0.0223757
256055_at	At1g07030	Duplicate		3.04966	0.0196426	0.0062949	0.0459566		8.88022	0.0683298	0.00769462	0.0294362		5.86694	0.180095	0.0306965	0.0723333		6.62129	0.0947376	0.014308	0.0464856
256061_at	At1g07040	Unique		3.84974	0.153974	0.0391614	0.101928		10.1136	0.114841	0.0113551	0.0335075		9.12551	1.4083	0.154326	0.130044		8.80489	1.36524	0.155055	0.132703
256060_at	At1g07050	Unique		6.43557	0.514565	0.0744161	0.111464		10.7587	0.0522821	0.0048595	0.0212527		5.83027	4.60471	0.789793	0.368055		5.20553	8.96213	1.72166	0.575096
256047_at	At1g07060	Unique		2.4959	0.000805423	0.000329236	0.0113706		4.82082	0.256887	0.0532871	0.105136		3.34419	0.228919	0.0684527	0.14307		3.49859	0.0266009	0.00760332	0.0466182
256065_at	At1g07070	Duplicate		9.5824	0.0276202	0.00289695	0.0173436		10.0876	0.0503312	0.00498943	0.0222399		8.54118	1.26894	0.148567	0.131887		8.83441	0.421146	0.0476711	0.073458
256034_at	At1g07080	Unique		8.97918	0.033269	0.00372042	0.0203134		11.5186	0.0807032	0.00700631	0.0246629		9.67912	0.4179	0.0431754	0.0667883		10.4284	0.092746	0.00889359	0.0292031
256062_at	At1g07090	Unique		2.50975	0.330806	0.129561	0.229169		9.41606	0.133356	0.0141626	0.0387826		6.63908	2.82765	0.425909	0.253282		6.64269	0.803479	0.120957	0.134941
256036_at	At1g07110	Unique		9.88076	0.0408303	0.0041512	0.0204503		10.7681	0.0597265	0.00554663	0.0226958		9.20026	0.660251	0.0717644	0.088319		10.5532	0.144933	0.0137335	0.0360743
256054_at	At1g07120	Unique		2.9973	0.00251983	0.000848045	0.0167477		2.8472	0.186831	0.0656192	0.151812		4.35928	1.48505	0.340665	0.279548		3.98003	0.129796	0.0326119	0.0905201
256063_at	At1g07130	Unique		2.39709	0.00496803	0.00209425	0.0294041		6.43819	0.0423654	0.00658033	0.03197		3.92427	0.185499	0.0472698	0.109752		3.58275	0.157808	0.0440465	0.110878
256046_at	At1g07135	Unique		2.3814	0.0182696	0.0076218	0.0567586		7.92914	0.155364	0.019594	0.0497106		5.9182	1.42823	0.241328	0.201934		6.12915	0.684671	0.111707	0.135002
256035_at	At1g07140	Duplicate		11.0918	0.020992	0.00190546	0.0130625		12.258	0.00372617	0.000303978	0.00497979		11.0605	0.317917	0.0287434	0.0509778		11.216	0.0808302	0.00720666	0.0253482
256045_at	At1g07150	Unique		3.18979	0.0118363	0.0037648	0.0341072		5.61673	0.0586019	0.0104334	0.0430995		3.93768	0.801179	0.203464	0.227313		5.68755	0.0697504	0.0122637	0.0464352
256044_at	At1g07160	Duplicate		2.27348	0.000521884	0.000230841	0.0100484		5.86585	0.198509	0.0338415	0.0759556		2.77929	0.363195	0.130679	0.216838		4.14508	0.0869273	0.0209712	0.0711287
256067_at	At1g07170	Duplicate		7.47364	0.0307352	0.00410066	0.0234578		9.81254	0.0486288	0.00495578	0.0224732		9.07436	0.225126	0.0248091	0.0522874		9.11982	0.0971122	0.0106485	0.0341705
256057_at	At1g07180	Duplicate		8.63615	0.5714	0.0684644	0.0875286		9.40637	0.117019	0.0124404	0.0363668		7.02005	5.4352	0.77424	0.332099		10.4569	2.48038	0.237199	0.15061
256056_at	At1g07190	Unique		2.69688	0.00357207	0.00134019	0.0221614		3.30564	0.145755	0.044093	0.115493		2.97987	0.110997	0.037249	0.111804		3.67224	0.102234	0.0278397	0.0870695
256043_at	At1g07210	Unique		6.94878	0.0220782	0.00315744	0.0213832		9.10819	0.053368	0.00585934	0.0253634		7.15182	0.405395	0.0566841	0.0890271		7.65964	0.0895724	0.0116941	0.0390732
256042_at	At1g07220	Unique		4.41865	0.0560083	0.0128684	0.0535595		8.28136	0.0240777	0.00290746	0.0187373		6.736	0.700951	0.10406	0.124292		6.68732	0.225885	0.033778	0.0710708
256041_at	At1g07230	Duplicate		4.85948	0.114178	0.0226563	0.0695345		9.55222	0.155999	0.0163312	0.0413482		7.78154	0.595489	0.0765259	0.0991679		7.49371	0.23359	0.0311715	0.0644957
256058_at	At1g07240	Tandem Duplicate		5.88275	0.0340581	0.00583722	0.0313711		9.22925	0.246863	0.0267479	0.0538346		7.52297	1.1168	0.148452	0.140475		8.23793	0.239123	0.0290271	0.0593598
256033_at	At1g07250	Tandem Duplicate		7.26813	0.0965991	0.0135482	0.0427626		9.94622	0.122905	0.0123569	0.0352473		8.34108	0.510187	0.0611657	0.0856333		9.68871	0.23173	0.0239175	0.049685
256053_at	At1g07260	Tandem Duplicate		2.38867	0.00029521	0.000124261	0.00719298		5.30998	0.319475	0.0601651	0.106445		4.81822	2.06639	0.42887	0.298345		4.48259	0.137122	0.0305899	0.0826085
256040_at	At1g07270	Duplicate		2.40701	0.0160679	0.00667393	0.0526627		6.08106	0.0436907	0.00718473	0.0343729		3.83471	0.373306	0.0973494	0.159331		4.55098	0.0670915	0.0147422	0.0569153
261075_at	At1g07280	Duplicate		8.28868	0.137719	0.0163447	0.0447725		11.8489	0.0566697	0.00478268	0.0200907		7.92971	3.45239	0.435374	0.234316		9.66342	0.495315	0.0512567	0.0728299
261074_at	At1g07290	Unique		2.37008	0.000755296	0.000320794	0.0115956		5.04731	0.157305	0.031166	0.0785797		4.26981	0.227892	0.053373	0.111804		4.66956	0.143208	0.0306685	0.0810416
261073_at	At1g07300	Unique		3.82781	0.0529821	0.0136166	0.0601331		6.56645	0.0664893	0.0101256	0.0392686		6.27626	0.542239	0.0863952	0.117326		6.75252	0.0791313	0.0117188	0.0416589
261083_at	At1g07310	Unique		7.27718	0.0589718	0.00809316	0.0333702		9.71783	0.0542905	0.00558669	0.0239769		8.58157	0.299925	0.0349499	0.0638175		8.22639	0.108039	0.0131332	0.0399558
261078_at	At1g07320	Unique		12.6841	0.00560778	0.000444726	0.00590384		12.7933	0.0146747	0.00114706	0.00946893		10.5925	3.32753	0.314141	0.172212		12.4371	0.260636	0.0209564	0.0410487
257489_at	At1g07330	Unique		2.44494	0.00112978	0.000465098	0.0137476		5.21808	0.0549807	0.0105366	0.044936		2.82056	2.10111	0.744925	0.513912		2.69941	0.0250196	0.00926856	0.0585965
261072_at	At1g07340	Unique		1.99201	0.000309486	0.00015591	0.00883139		5.78714	0.0732819	0.0126629	0.0467772		2.61206	2.13344	0.816767	0.559187		2.17258	0.00594262	0.00273529	0.0354825
261081_at	At1g07350	Unique		7.8753	0.131847	0.0163827	0.0461072		9.30894	0.203093	0.021817	0.0484113		8.27782	0.975628	0.117861	0.119324		9.52371	1.39396	0.146367	0.123971
261082_at	At1g07360	Unique		7.44315	0.029534	0.00395463	0.023089		9.76317	0.0124523	0.00127543	0.0114297		8.268	0.199469	0.0241254	0.0540179		9.17066	0.116049	0.0126544	0.0371467
261080_at	At1g07370	Duplicate		7.96993	0.0917646	0.0114306	0.0380087		9.85723	0.0258435	0.00262178	0.0163087		7.7411	3.20515	0.414043	0.231271		8.24797	0.445073	0.0539616	0.0808852
261071_at	At1g07380	Duplicate		2.83631	0.0900809	0.031708	0.105819		7.63554	0.0255856	0.00335086	0.0209487		5.77822	1.06565	0.184425	0.178654		6.45604	0.156124	0.0241826	0.0612024
261070_at	At1g07390	Unique		2.85392	0.0696393	0.0241481	0.0924669		7.7791	0.149753	0.0192507	0.049746		5.15516	0.902714	0.175109	0.184303		5.47103	0.351409	0.0642309	0.108352
261069_at	At1g07410	Duplicate		2.4302	0.000926378	0.000384297	0.0125242		6.43748	0.0271227	0.00421324	0.0255829		5.0131	1.82502	0.36405	0.26948		3.75277	0.431481	0.114977	0.175037
261076_at	At1g07420	Duplicate		5.92364	0.178654	0.0285671	0.0713539		10.0519	0.105239	0.0104696	0.0322731		7.95815	0.398147	0.0500302	0.0792885		7.34093	0.985362	0.134229	0.135222
261077_at	At1g07430	Duplicate		2.50146	0.0976589	0.0376225	0.124929		8.13066	0.343902	0.042297	0.072126		5.50747	4.78407	0.868652	0.397143		6.03539	6.55162	1.08554	0.424101
261084_at	At1g07440	Tandem Duplicate		9.25563	0.0946411	0.0101412	0.0332379		10.8792	0.0164757	0.00151443	0.0117985		8.04016	5.34648	0.664972	0.287587		9.73128	0.430509	0.0442397	0.067425
261068_at	At1g07450	Tandem Duplicate		5.08517	0.498332	0.0990321	0.13882		6.52858	0.0160662	0.0024609	0.019415		5.02028	2.8517	0.568036	0.336375		6.5207	1.08774	0.166813	0.159944
261067_at	At1g07460	Unique		2.35558	0.00219659	0.000933106	0.0198965		3.56827	0.258557	0.0724599	0.142502		2.54917	0.0653988	0.0256549	0.100319		2.61669	0.0111959	0.00427862	0.0404367
261079_s_at	At1g07470	Duplicate		7.55086	0.0180032	0.00236158	0.0177696		9.30217	0.0284496	0.00305839	0.0181323		9.01307	0.145381	0.01613	0.0423039		9.66426	0.136741	0.0141491	0.0382631
261066_at	At1g07490	Unique		3.18282	0.00415278	0.00132136	0.0202469		3.95672	0.193757	0.048969	0.111248		3.80117	0.21739	0.0571903	0.12266		4.2472	0.166586	0.0392226	0.0960986
261065_at	At1g07500	Unique		2.47152	0.0037394	0.00154379	0.0247421		5.88712	0.302176	0.0513283	0.0933742		3.9132	3.78158	0.966365	0.496941		5.93231	2.85371	0.481045	0.284761
261064_at	At1g07510	Duplicate		6.63519	0.0344451	0.0051902	0.0279712		8.42509	0.0511558	0.00607184	0.0268456		8.39694	0.378012	0.0450178	0.0732203		9.07302	0.122895	0.0135451	0.0386381
261063_at	At1g07520	Unique		2.73987	0.00222129	0.000832328	0.0172017		7.18318	0.0983483	0.0136915	0.0436583		5.68542	0.503853	0.0886219	0.12485		5.33456	0.581336	0.108975	0.142927
261062_at	At1g07530	Unique		5.65396	0.025978	0.00458426	0.0285069		9.08237	0.00470934	0.000518514	0.0075558		7.6937	0.764157	0.0993223	0.11362		7.96716	0.220552	0.0276826	0.0589456
261061_at	At1g07540	Unique		1.9103	0.00146736	0.00077345	0.0200524		2.82262	0.0787146	0.0278871	0.0993974		2.63769	1.76953	0.670863	0.504318		2.15437	0.0432696	0.0200845	0.096554
261091_at	At1g07550	Tandem Duplicate		3.13509	0.00263898	0.00085243	0.0163858		5.23093	0.0222058	0.0042451	0.0284875		3.53378	0.305142	0.0863501	0.156319		3.96075	0.0388543	0.00980984	0.0497671
261090_at	At1g07560	Tandem Duplicate		2.87045	0.0265341	0.00931342	0.0567483		5.94866	0.00485237	0.000815708	0.01171		3.98334	1.85196	0.464925	0.341639		5.28223	0.108148	0.020474	0.0622577
261089_at	At1g07570	Duplicate		5.71576	0.0795521	0.0139895	0.049346		7.589	0.154506	0.0203592	0.0517951		6.78206	0.941478	0.138819	0.143068		8.16006	0.405542	0.0496984	0.0780413
261088_at	At1g07590	Unique		3.11028	0.0523674	0.0164528	0.0735752		6.75632	0.103192	0.0152734	0.0475458		4.95013	0.813064	0.164251	0.182157		5.58619	0.256808	0.0459719	0.090717
261438_at	At1g07600	Unique		13.5299	0.0240001	0.00178143	0.0114502		14.6253	0.0226233	0.00154686	0.0102843		13.7145	1.21354	0.0884863	0.0803246		14.8026	0.0452948	0.00305993	0.0143776
261410_at	At1g07610	Unique		12.1303	0.45157	0.0376801	0.0553975		12.045	0.0201346	0.00167162	0.0117806		11.0223	5.1573	0.467896	0.206034		12.2406	0.399477	0.0326355	0.051635
261435_at	At1g07620	Unique		2.49596	0.0203437	0.00825749	0.0571449		6.59842	0.0665784	0.0100901	0.0391045		5.12262	0.663341	0.129493	0.158992		5.48495	0.276223	0.0503602	0.0958203
261413_at	At1g07630	Duplicate		4.58608	0.0950596	0.0200851	0.0672289		8.65555	0.0481384	0.00556156	0.0253484		6.97115	0.454317	0.0651709	0.0966885		7.49014	0.311848	0.0416344	0.0745558
261409_at	At1g07640	Unique		6.59073	0.0758141	0.0113908	0.0417774		9.34452	0.0196073	0.00209827	0.0149848		7.26983	0.961839	0.132306	0.134905		8.60584	0.262178	0.0304651	0.0594983
261434_at	At1g07650	Duplicate		6.52018	0.0195413	0.00304492	0.0214396		9.61139	0.0304867	0.00317194	0.0181664		7.63692	1.10679	0.144926	0.137757		8.5822	0.238133	0.0277473	0.0568605
261433_s_at	At1g07670	Unique		6.90248	0.0185702	0.00268377	0.0197426		9.20548	0.0304183	0.00330437	0.0189462		9.20519	0.275767	0.0299577	0.0570477		9.52836	0.0745465	0.00782364	0.0286547
261432_at	At1g07680	Unique		2.1976	0.0010265	0.000470514	0.0145791		3.72659	0.424879	0.114013	0.174913		3.02396	0.093815	0.0310239	0.101288		3.7067	0.0111829	0.00301693	0.0285291
261466_at	At1g07690	Unique		2.37742	0.00128327	0.000543149	0.0150679		4.1019	0.235265	0.0573552	0.118248		3.28618	0.203401	0.0618959	0.137241		3.53767	0.0237681	0.00671859	0.0435793
261417_at	At1g07700	Unique		9.28546	0.0357804	0.00384369	0.0203713		11.3165	0.0283772	0.00250759	0.0148858		9.35579	1.2777	0.136568	0.120819		10.8006	0.178031	0.0164833	0.0390659
261465_at	At1g07705	Unique		5.85776	0.0123472	0.00210812	0.0189693		8.99731	0.0688808	0.00765571	0.02917		6.77352	0.150052	0.0221527	0.0571881		7.26384	0.0419886	0.0057805	0.0282098
261420_at	At1g07720	Duplicate		7.50412	0.020114	0.00276344	0.0188994		9.23578	0.0475116	0.00514429	0.0236008		6.85133	3.54713	0.517729	0.274893		8.68886	1.31972	0.151886	0.132214
261464_at	At1g07730	Unique		2.04702	0.0151873	0.00729891	0.0602032		6.11374	0.0439584	0.0071901	0.0342937		3.87409	1.49381	0.38559	0.315485		3.63928	0.306375	0.0841857	0.152094
261463_at	At1g07740	Unique		2.89893	0.315198	0.105248	0.193666		5.90592	0.0348349	0.00589831	0.0316024		4.34502	0.0554595	0.0127639	0.0541996		5.12357	0.0353448	0.00689847	0.0366936
261437_at	At1g07745	Unique		2.08485	0.003078	0.00146067	0.0266108		5.64073	0.0716852	0.0127085	0.0474656		3.61329	0.269019	0.0744528	0.143545		3.24527	0.10192	0.0314056	0.0983734
261415_at	At1g07750	Duplicate		6.09509	0.718949	0.125672	0.139113		10.1924	0.238501	0.0234	0.0479149		9.21788	1.5571	0.168921	0.135371		8.14387	0.249197	0.0305994	0.0612972
261416_at	At1g07770	Duplicate		12.8393	0.0179931	0.00140682	0.0104475		13.3219	0.0225874	0.00169552	0.0112816		12.8379	0.562777	0.0438371	0.058435		13.2775	0.0646627	0.00487011	0.0191519
261411_at	At1g07790	Unique		9.13111	0.0833574	0.00899875	0.031619		10.0308	0.0990111	0.00987072	0.0313694		9.35041	1.44665	0.154715	0.128632		9.67023	0.175836	0.0181833	0.0433628
261414_at	At1g07795	Unique		1.84752	0.000213169	0.000115907	0.00790267		6.39151	0.0385424	0.00603025	0.0307161		5.23988	0.797136	0.152129	0.17039		5.60147	0.00380568	0.000679407	0.0110132
261408_s_at	At1g07820	Unique		9.22121	0.0463425	0.00504317	0.0233454		10.1843	0.0194874	0.00191347	0.0137071		10.3027	0.621533	0.0603269	0.0765207		11.2116	0.069275	0.00617888	0.0234759
261418_at	At1g07830	Unique		7.8823	0.0874207	0.0110283	0.0375106		10.346	0.0312149	0.00301709	0.0170768		8.45429	0.637137	0.0753626	0.0944146		8.0678	0.0727184	0.00901341	0.0334247
261419_at	At1g07840	Unique		7.39207	0.00655355	0.000891019	0.0109515		8.16891	0.0213904	0.00261852	0.0179038		7.53672	0.113594	0.015072	0.0447193		7.74763	0.0872989	0.0112678	0.038136
261462_at	At1g07850	Unique		2.21706	0.000636975	0.000289099	0.0113837		4.38799	0.264975	0.0603864	0.117311		2.57849	1.52047	0.589673	0.478215		2.36763	0.0131789	0.00556629	0.0484871
261461_at	At1g07860	Unique		2.52194	0.00119454	0.000476616	0.0137046		3.76455	0.119639	0.0317805	0.0918805		2.58711	0.255449	0.0987394	0.195361		2.64665	0.00950071	0.00358971	0.0368282
261436_at	At1g07870	Duplicate		3.89569	0.046274	0.0119941	0.0552184		7.6299	0.0968648	0.0126954	0.040791		7.89036	1.33568	0.169281	0.146472		7.21552	0.497484	0.0689464	0.0977511
261460_at	At1g07880	Unique		2.36442	0.0811726	0.0331405	0.120498		5.10212	0.393771	0.0771779	0.12299		4.48999	2.17151	0.483634	0.328198		5.22954	0.528624	0.101084	0.13903
261412_at	At1g07890	Duplicate		12.7506	0.0255243	0.00198462	0.0125299		13.6373	0.01757	0.00128839	0.00971985		12.6673	0.836998	0.0660756	0.0722236		13.2934	0.167808	0.0126233	0.0308154
260677_at	At1g07910	Unique		5.10261	0.0576083	0.0112486	0.0470382		7.37601	0.07022	0.00952004	0.035926		5.79288	0.149052	0.0257302	0.066646		6.33076	0.121293	0.0191592	0.0550125
257495_at	At1g07960	Unique		7.18535	0.050083	0.00694705	0.0311456		9.84557	0.0328607	0.00333761	0.0184119		8.56175	0.173448	0.0202585	0.0486432		8.53172	0.0780027	0.00914267	0.0327354
260678_at	At1g07970	Unique		6.45586	0.00803265	0.00124844	0.0138827		8.66214	0.0184968	0.00213536	0.0157008		6.76455	0.441263	0.0652317	0.0981997		7.40677	0.0678289	0.00915769	0.0351624
260622_at	At1g07980	Unique		5.08591	0.0371921	0.00722	0.037919		7.50527	0.0400741	0.00533947	0.0266726		6.41256	0.16094	0.0250977	0.0625606		7.27042	0.121079	0.0166537	0.0478603
260679_at	At1g07990	Duplicate		5.83228	0.0162968	0.00277311	0.0218883		8.41533	0.0228603	0.00271651	0.0179668		7.17837	0.142672	0.0198752	0.0526191		7.57818	0.119764	0.0158037	0.0456665
260680_s_at	At1g08000	Tandem Duplicate		5.25632	0.0171631	0.00327636	0.024924		7.35732	0.0152046	0.0020666	0.0167598		7.00315	0.232477	0.0331961	0.0688488		7.54926	0.0663924	0.00879456	0.0341315
260681_at	At1g08020	Unique		3.87611	0.00882356	0.00228662	0.0242341		5.98606	0.0166899	0.00278813	0.0215817		5.9407	0.391718	0.0659381	0.105354		6.40857	0.0412792	0.00644124	0.0317033
260647_at	At1g08030	Unique		4.9664	0.0329551	0.00650675	0.0365527		8.30493	0.0972215	0.0117065	0.0375444		7.0684	0.651126	0.0921178	0.114159		7.82476	0.0445815	0.00569749	0.026984
260626_at	At1g08040	Duplicate		6.92931	0.0268813	0.00385898	0.0236611		9.86137	0.0510022	0.00517192	0.0229011		8.54927	0.255283	0.0298602	0.0590992		8.52623	0.175125	0.0205396	0.0490814
260648_at	At1g08050	Duplicate		2.29959	0.001476	0.000643458	0.0167068		8.14542	0.212034	0.0260311	0.0565313		5.36958	1.35334	0.252038	0.216652		5.10996	0.90762	0.177618	0.186438
260625_at	At1g08060	Unique		4.39422	0.00791193	0.00178373	0.0202423		7.99624	0.0146978	0.00183808	0.0151614		6.20997	0.27648	0.044522	0.0846725		6.35626	0.0405116	0.0063735	0.0316656
260621_at	At1g08065	Unique		1.92804	0.000440315	0.000230022	0.0108834		5.5805	0.0632921	0.0113416	0.0450818		2.656	1.33422	0.50234	0.434895		2.56723	0.0405323	0.0157883	0.0784216
260620_at	At1g08070	Unique		2.44797	0.00436771	0.00178649	0.0269973		6.46013	0.0306827	0.00474955	0.0271147		3.80932	0.0932171	0.0244708	0.0801493		3.94216	0.0657198	0.016671	0.0650301
260649_at	At1g08080	Unique		2.27481	0.000556637	0.000246268	0.0103715		4.84016	0.323258	0.0667867	0.117467		2.94237	0.0868665	0.0295226	0.100168		2.99649	0.0441399	0.0147306	0.0701138
260623_at	At1g08090	Tandem Duplicate		3.26237	0.0723621	0.0234528	0.0824561		6.58752	0.473221	0.0718361	0.104426		2.08893	0.304148	0.1456	0.264009		4.35899	0.0895161	0.020536	0.068638
260624_at	At1g08100	Tandem Duplicate		1.76598	0.000369605	0.000210182	0.0108864		2.66127	0.0216873	0.00814925	0.0553368		2.19857	0.0237804	0.0108163	0.0701405		3.20553	0.00408765	0.00127519	0.0199451
260619_at	At1g08110	Unique		9.50892	0.0239648	0.00250667	0.01628		10.9049	0.104616	0.00959351	0.0296605		10.2173	0.373472	0.036553	0.0598128		10.8825	0.0566469	0.00520534	0.0218706
261810_at	At1g08130	Unique		7.50911	0.0723912	0.00966524	0.0358306		8.65873	0.163762	0.018913	0.0467361		7.52286	0.553051	0.073516	0.0988552		8.10868	0.187153	0.0230806	0.0533517
261816_at	At1g08150	Unique		2.43583	0.0014143	0.000584798	0.0154391		5.7131	0.0381499	0.00667762	0.0341881		3.86496	1.00546	0.260148	0.25944		4.22249	0.0141187	0.00334369	0.0281403
261755_at	At1g08170	Unique		2.44871	0.000882603	0.000366956	0.0121323		5.69826	0.0807145	0.0141648	0.0498579		3.21917	2.84166	0.882728	0.52365		3.07997	0.0306963	0.00996641	0.0568847
261817_at	At1g08180	Unique		3.41686	0.0432632	0.0125272	0.060874		6.32333	0.0359998	0.00569317	0.0300057		5.94925	0.463008	0.0778262	0.114375		6.12542	0.0669721	0.0109335	0.0422485
261783_at	At1g08190	Unique		7.62349	0.0361709	0.00473266	0.0249474		8.92556	0.209321	0.0234519	0.0512591		9.44605	0.24115	0.0255292	0.0519869		9.92489	0.13282	0.0133825	0.0367202
261757_at	At1g08210	Duplicate		6.16468	0.065632	0.0106195	0.0415573		8.70134	0.0170576	0.00196034	0.0150097		7.71215	0.386243	0.0500824	0.0805851		7.75762	0.121406	0.0156499	0.044915
261784_at	At1g08220	Unique		4.89487	0.0712579	0.0144328	0.054535		8.37422	0.0314474	0.00375526	0.0211762		5.90252	0.352039	0.0596422	0.100521		6.41302	0.218424	0.0340595	0.0728766
261785_at	At1g08230	Unique		3.8418	0.400079	0.107609	0.164641		7.44513	0.695639	0.0934355	0.112026		5.14271	1.93257	0.375789	0.270319		6.44566	0.904144	0.140272	0.14752
261758_at	At1g08250	Unique		6.3035	0.0672925	0.0107538	0.041153		8.0585	0.0140947	0.00174905	0.0147324		6.87712	0.73405	0.106738	0.124582		8.66735	0.492007	0.0567656	0.0809281
261811_at	At1g08260	Duplicate		3.96064	0.00582091	0.00146301	0.0192633		5.70343	0.245985	0.0431292	0.0869596		5.5463	0.364794	0.0657725	0.108898		6.63954	0.485165	0.0730721	0.104908
261812_at	At1g08270	Unique		3.20123	0.0030411	0.000966389	0.0172265		5.38716	0.0209113	0.0038817	0.026843		4.09273	0.299912	0.0732792	0.133809		4.17148	0.0865063	0.0207376	0.0705072
261813_at	At1g08280	Unique		5.12182	0.0506854	0.0096849	0.0439559		7.68487	0.163246	0.0212425	0.0525756		5.84299	0.79724	0.136444	0.152813		6.35095	0.295789	0.046574	0.0856353
261814_at	At1g08310	Unique		2.12009	0.000476051	0.000226028	0.0102914		5.1935	0.0624352	0.0120218	0.0481121		3.46337	2.50655	0.723731	0.45713		3.11047	0.0305048	0.00980714	0.0561511
261756_at	At1g08320	Unique		3.34489	0.0018344	0.000573626	0.0128046		8.82387	0.0220962	0.00250414	0.0168461		7.11941	0.942792	0.132426	0.136384		7.23687	0.23366	0.0322875	0.0667946
261815_at	At1g08325			1.95429	0.0140063	0.00732837	0.0605582		3.56832	0.0502816	0.0140911	0.0628407		4.17942	5.21958	1.24887	0.54664		4.45878	0.234004	0.0524817	0.108491
261809_at	At1g08340	Unique		2.6446	0.0455364	0.0168322	0.0806899		6.51486	0.0352058	0.00540393	0.0288007		4.96409	2.80771	0.565604	0.337549		4.73051	0.119481	0.0252574	0.0730703
261747_at	At1g08350	Unique		5.54482	0.0612571	0.0107389	0.0446366		7.98124	0.0770055	0.00964831	0.0347689		6.80756	0.620093	0.0910889	0.115674		7.22054	0.161422	0.0223559	0.0556432
261694_at	At1g08360	Duplicate		11.9203	0.016147	0.00135712	0.01066		12.5362	0.0146315	0.00116714	0.00964891		12.3458	0.669576	0.0542352	0.0662798		12.8683	0.122184	0.00949497	0.0271636
261693_at	At1g08370	Unique		6.84818	0.0281474	0.00409403	0.0244987		9.1303	0.0227846	0.00249549	0.0165324		8.45079	0.236672	0.0280058	0.0575672		8.76428	0.0413478	0.00471776	0.0232012
261746_at	At1g08380	Unique		13.1476	0.0137201	0.00104624	0.0089091		14.2411	0.0218912	0.00153719	0.0103894		11.8008	8.19968	0.694842	0.242654		14.334	0.0732039	0.005107	0.0188755
261742_at	At1g08390	Unique		5.15119	0.0510192	0.00974751	0.043849		8.25676	0.12904	0.0156284	0.0435063		6.25702	0.627249	0.100247	0.126576		7.01773	0.36128	0.0514811	0.0856496
261743_s_at	At1g08420	Duplicate		5.58077	0.0176008	0.00312039	0.0237724		7.67348	0.0678706	0.00884483	0.0339507		7.35928	0.259957	0.0353237	0.0692812		8.58736	0.162838	0.0189625	0.0469913
257481_at	At1g08430	Tandem Duplicate		2.46092	0.000570048	0.000235554	0.00970195		2.74666	0.141289	0.0514404	0.136852		4.01876	2.79504	0.695499	0.416008		3.98169	0.170639	0.0428559	0.103746
261692_at	At1g08450	Unique		7.66281	0.0168462	0.00218056	0.016938		11.4029	0.183745	0.0161139	0.0375918		9.00276	2.52757	0.280755	0.176594		9.58742	0.322966	0.0336864	0.0592757
261720_at	At1g08460	Unique		6.67741	0.113935	0.0171006	0.0505499		9.34419	0.234479	0.0250935	0.0518215		8.35489	0.46129	0.0552119	0.0812917		8.69892	0.202722	0.0233043	0.0517589
261696_at	At1g08470	Duplicate		6.93435	0.166002	0.0237306	0.0587558		9.52602	0.0987448	0.0103658	0.0329872		8.11348	0.412167	0.0508002	0.0791278		8.19742	0.128386	0.0156617	0.04371
261721_at	At1g08480	Unique		9.54513	0.0119177	0.00124902	0.0114371		11.4627	0.0346817	0.0030256	0.0162466		10.5308	0.178355	0.0169365	0.0401035		10.6474	0.0768359	0.00721638	0.0260338
261744_at	At1g08490	Unique		8.04486	0.0256194	0.0031794	0.019896		9.60191	0.0495987	0.0051655	0.0231941		7.45204	0.55886	0.0749942	0.100317		8.40258	0.0590343	0.00702574	0.0289161
261745_at	At1g08500	Unique		2.60875	0.196567	0.0746319	0.16995		7.89038	0.271507	0.0344099	0.0660378		5.51751	2.778	0.503488	0.302081		5.41039	1.96018	0.362299	0.258773
261722_at	At1g08510	Unique		9.7073	0.021919	0.00226339	0.0152515		10.9936	0.0255359	0.0023228	0.0145357		10.7933	0.459814	0.0426018	0.0628257		11.0735	0.11105	0.0100285	0.0300938
261695_at	At1g08520	Unique		10.8054	0.00616809	0.000569864	0.00726832		11.3838	0.0218939	0.00192326	0.012998		9.85201	2.03105	0.206155	0.144656		11.3871	0.0964283	0.0084682	0.0272702
264781_at	At1g08540	Unique		9.11847	0.0440797	0.00485934	0.0230249		9.58082	0.152231	0.0158892	0.0407239		8.62103	2.63854	0.306058	0.188418		10.9906	0.144453	0.0131434	0.0345815
264799_at	At1g08550	Unique		9.6456	0.0550163	0.00564131	0.0243173		11.1025	0.0696318	0.00627175	0.0237676		8.46159	2.98711	0.35302	0.204256		10.2108	0.656725	0.064317	0.0793659
264802_at	At1g08560	Unique		8.16508	0.230025	0.0280773	0.058739		8.61001	0.108268	0.0125747	0.0382161		8.33932	4.87146	0.584156	0.264667		8.92231	0.472063	0.0529082	0.0770057
264779_at	At1g08570	Unique		9.11491	0.216001	0.0234691	0.0509889		10.8736	0.108951	0.0100197	0.0303557		9.69533	0.662027	0.0682831	0.0839219		10.2424	0.519936	0.0507631	0.0704
264803_at	At1g08580	Unique		9.02506	0.0437739	0.0048633	0.0231823		9.80764	0.0465483	0.00474612	0.0219982		8.97331	0.561925	0.0626218	0.0835384		8.71838	0.317332	0.0363981	0.0646132
264804_at	At1g08590	Duplicate		2.37231	0.00536149	0.0023177	0.0308653		6.6784	0.00948474	0.00142021	0.0145828		5.16326	0.76634	0.148422	0.169546		5.24393	0.0777854	0.0148334	0.0531853
264805_at	At1g08600	Unique		5.3401	0.0165958	0.00307579	0.024124		6.9405	0.293801	0.0423314	0.0780973		7.20796	0.592606	0.0822154	0.1068		7.45261	0.0368272	0.00494152	0.0257499
264806_at	At1g08610	Unique		5.82382	0.249189	0.042633	0.0857149		7.92687	0.0522079	0.0065862	0.0288248		5.48568	1.20636	0.219911	0.20022		6.45356	0.364908	0.0565437	0.0936036
264792_at	At1g08620	Unique		6.48036	0.0438752	0.0066422	0.0323229		8.22097	0.134711	0.0163863	0.0446456		8.2569	0.271651	0.0328999	0.0631231		8.80654	0.091269	0.0103638	0.0343049
264777_at	At1g08630	Duplicate		2.20457	0.000432616	0.000197568	0.00943466		6.21817	0.040091	0.00644739	0.0322004		5.09203	5.04628	0.991015	0.441158		4.68761	1.78061	0.379853	0.284664
264811_at	At1g08640	Unique		10.5046	0.0619942	0.00598951	0.0237025		11.4586	0.0228182	0.00199136	0.0131829		9.40417	0.974367	0.10361	0.104964		10.6489	0.0407632	0.00382791	0.0189595
264783_at	At1g08650	Duplicate		1.77854	0.219849	0.113915	0.263633		9.53154	0.296579	0.0311155	0.0571356		6.31596	1.32339	0.209531	0.18214		5.63241	2.09807	0.372499	0.257167
264793_at	At1g08660	Unique		7.20844	0.0233523	0.00322048	0.0211994		8.80176	0.0566394	0.00643501	0.0270389		7.93485	0.68308	0.0860861	0.104159		8.30006	0.223278	0.0269008	0.0569301
264794_at	At1g08670	Unique		2.99908	0.00274633	0.000925525	0.0174738		4.30277	0.0808559	0.0187916	0.0660858		3.65825	1.13641	0.310644	0.291404		3.73661	0.040311	0.0107881	0.0537321
264795_at	At1g08680	Unique		4.13593	0.00527878	0.00128221	0.0175668		6.95982	0.0895579	0.0128678	0.0429986		5.35993	0.377071	0.0703499	0.114565		6.5383	0.153096	0.0234152	0.0598435
264796_at	At1g08690			6.5284	0.0548878	0.00837224	0.0358865		8.7335	0.0461937	0.00528925	0.0246095		7.55635	0.144225	0.0190866	0.0502584		8.41397	0.048	0.0057048	0.0260387
264807_at	At1g08700	Unique		7.22423	0.0109263	0.00152113	0.0144692		9.38285	0.017722	0.00188876	0.014188		8.21068	0.364086	0.0443429	0.0734891		8.34617	0.0555874	0.00666023	0.0282489
264797_at	At1g08710	Unique		3.21912	0.0124982	0.00387322	0.0347286		6.60927	0.00533867	0.000807755	0.0110551		5.25898	0.155371	0.029544	0.0749521		6.86103	0.0925237	0.0134854	0.044334
264780_at	At1g08720	Unique		4.33382	0.0155984	0.00356369	0.0288183		7.80652	0.0389311	0.004987	0.025275		6.82153	0.359956	0.0527677	0.0879514		7.12077	0.0857224	0.0120384	0.0411169
264798_at	At1g08730	Duplicate		2.36544	0.000952178	0.000408205	0.0130451		6.24396	0.0377414	0.00604446	0.0311135		4.15011	1.34624	0.324387	0.279577		4.2153	0.0415113	0.00984778	0.0483343
264810_at	At1g08750	Unique		6.50916	0.0216202	0.00332725	0.0225894		9.74474	0.00563218	0.000577971	0.00770137		7.58761	0.162405	0.021404	0.0531122		7.86929	0.0231384	0.00294033	0.0193299
264808_at	At1g08770	Unique		4.76995	0.0359642	0.00752882	0.0397577		9.59041	0.025991	0.0027101	0.0168102		7.60642	0.53637	0.0705154	0.0962835		8.01433	0.0758011	0.00945819	0.0343534
264778_at	At1g08780	Unique		7.44166	0.0456077	0.00612737	0.0286978		9.04253	0.0381473	0.00421865	0.0215994		8.75468	0.278367	0.0317964	0.0602655		8.75435	0.0441053	0.0050381	0.0239895
264800_at	At1g08800	Unique		3.24023	0.0149125	0.00460623	0.0376876		7.3171	0.0614085	0.00839247	0.0338669		5.7553	1.59039	0.276335	0.219121		6.18249	0.350863	0.0567511	0.0958088
264782_at	At1g08810	Unique		5.22955	0.28275	0.0532429	0.10168		6.96754	0.050798	0.00729066	0.0323477		5.21701	3.64207	0.698114	0.365807		6.73303	0.356998	0.0530219	0.0887406
264809_at	At1g08830	Duplicate		11.9332	0.0478364	0.00402583	0.0183283		11.0809	0.156706	0.0141419	0.0357245		11.8811	1.05445	0.0887505	0.0864285		9.00792	0.504652	0.0560231	0.0788627
264801_at	At1g08840	Unique		2.58094	0.00203675	0.000789067	0.017486		7.49874	0.0558691	0.00745047	0.0315208		5.1639	0.739413	0.143189	0.16652		5.6262	0.436707	0.0776202	0.117457
264646_at	At1g08860	Duplicate		1.86134	0.000249028	0.000134361	0.00847809		3.29654	0.244264	0.0740971	0.149924		3.58481	1.46483	0.408621	0.337619		2.47835	0.0249576	0.0100702	0.0637438
264651_at	At1g08880	Unique		9.32704	0.0258546	0.00278034	0.0172395		11.2379	0.0324651	0.00288889	0.0160333		9.35562	0.607942	0.0649815	0.083341		10.2104	0.166259	0.0162834	0.0399347
264654_s_at	At1g08900	Unique		6.66063	0.0273595	0.00415762	0.0248336		9.84917	0.0195736	0.00198733	0.0142048		7.98956	1.03889	0.130031	0.127574		9.87668	0.541501	0.0548262	0.0745055
264652_at	At1g08920	Tandem Duplicate		4.20269	1.44292	0.350247	0.28582		10.1965	0.148363	0.0145504	0.0377756		7.37229	2.33823	0.317165	0.207416		7.80051	1.07535	0.137856	0.132939
264624_at	At1g08930	Tandem Duplicate		8.56202	0.153763	0.0183467	0.0457983		12.3558	0.0174184	0.00140974	0.0106815		8.94812	7.1545	0.799553	0.298922		10.555	1.50633	0.142713	0.11628
264645_at	At1g08940	Unique		3.05306	0.0234152	0.00771223	0.0501202		8.39231	0.145265	0.0173093	0.0454149		7.21785	1.75879	0.243672	0.183738		7.11726	0.544668	0.0765278	0.103694
264644_at	At1g08960	Unique		5.55482	0.0115365	0.00209622	0.019336		8.67538	0.00587852	0.00067761	0.00883783		6.28781	0.106411	0.0169234	0.0518793		6.53234	0.0789291	0.0120828	0.0430081
264650_at	At1g08970	Duplicate		7.99513	0.0121147	0.00151906	0.0137667		10.82	0.018652	0.00172385	0.0126222		8.84224	0.386562	0.0437176	0.0703149		9.23118	0.106408	0.011527	0.035337
264653_at	At1g08980	Unique		8.43523	0.098163	0.0114499	0.037143		10.7604	0.0406176	0.00377474	0.0187297		8.93262	1.49134	0.166955	0.136713		9.61741	0.60071	0.0624607	0.0805888
264643_at	At1g08990	Unique		2.35433	0.000939873	0.000402356	0.0130217		4.16892	0.307444	0.0737467	0.133002		3.2783	2.96683	0.904992	0.52541		2.6228	0.0338439	0.0129037	0.0701415
264623_at	At1g09000	Duplicate		2.09862	0.000261317	0.00012607	0.00770283		6.1977	0.0714572	0.0115296	0.0431313		3.45307	0.421202	0.121979	0.187949		3.95249	0.0756757	0.0191463	0.0695996
264656_at	At1g09010	Unique		7.35839	0.0834248	0.0111847	0.0392523		9.64483	0.0895654	0.00928637	0.0310296		8.44206	0.422005	0.0499884	0.0769503		9.17139	0.161492	0.0176083	0.0438169
264625_at	At1g09020	Unique		5.35565	0.140499	0.0262641	0.069988		8.86617	0.105663	0.0119176	0.0366628		6.35454	0.252123	0.039676	0.0790173		5.35492	0.441266	0.0824039	0.12405
264642_at	At1g09030	Unique		3.27315	0.00959382	0.0029688	0.0299247		3.31568	0.163974	0.0494543	0.122128		3.54063	0.185664	0.0524381	0.121698		4.55701	0.0694215	0.015234	0.0578185
264649_at	At1g09060	Unique		6.03294	0.0779894	0.0129265	0.0462901		8.61541	0.0650891	0.00755496	0.0296127		7.81021	0.166835	0.0213611	0.0522975		8.72351	0.0915212	0.0104913	0.0346793
264655_at	At1g09070	Unique		8.65338	0.0883604	0.0101311	0.0343513		11.7423	0.0530507	0.00451793	0.0196153		11.3215	1.24743	0.110183	0.0986517		11.4459	1.1188	0.0977463	0.0924111
264648_at	At1g09080	Duplicate		3.15353	0.0127801	0.00412856	0.0358484		5.79162	0.936431	0.161687	0.167085		5.14248	2.2259	0.432845	0.290121		5.48278	0.606384	0.110598	0.142028
264647_at	At1g09090	Duplicate		2.30185	0.000758298	0.000332265	0.0119631		2.89513	0.117292	0.0405137	0.118295		2.93963	2.14958	0.731243	0.498752		2.64655	0.0196724	0.00743322	0.0529967
264657_at	At1g09100	Duplicate		6.43306	0.0179439	0.00276064	0.0208229		9.26461	0.0545431	0.00588725	0.0252082		8.08067	0.254091	0.0314443	0.0623803		8.11719	0.26616	0.0327896	0.0635573
264641_at	At1g09130	Unique		10.1761	0.0227253	0.00224005	0.014814		11.6753	0.0190008	0.00162743	0.0118064		10.0996	0.758622	0.0751139	0.0862398		10.5836	0.0629843	0.00595114	0.0237128
264255_at	At1g09140	Unique		6.24959	0.0620278	0.00960242	0.0398512		9.26252	0.0076013	0.000820652	0.00941272		7.88963	0.424538	0.0538096	0.0825851		8.68387	0.589605	0.0678966	0.0884235
264254_at	At1g09150	Unique		8.0212	0.0155609	0.00191453	0.0155517		9.8527	0.0242632	0.0024626	0.0158095		8.68654	0.183228	0.0210933	0.0492776		8.64974	0.0488361	0.00564596	0.0255486
264263_at	At1g09155	Duplicate		2.78574	0.00227473	0.000824916	0.0171208		3.60274	0.361831	0.100432	0.166963		4.33085	2.62803	0.606815	0.374319		3.46512	0.0486317	0.0140346	0.0636416
264266_at	At1g09160	Duplicate		6.78777	0.0302549	0.00449856	0.0256254		8.18006	0.0201648	0.00246512	0.0173596		7.08748	0.825226	0.116434	0.128173		7.87424	0.308205	0.0391409	0.0705036
264253_at	At1g09170	Duplicate		2.28711	0.000811093	0.000356931	0.0124523		5.62588	0.167668	0.0298029	0.0727837		3.07334	1.47952	0.481405	0.395776		3.36398	0.0585052	0.0173917	0.0719025
264252_at	At1g09180	Duplicate		2.31691	0.00665605	0.00286087	0.0352127		7.52956	0.226275	0.0300516	0.0631756		5.26924	0.568382	0.107868	0.143078		5.50589	0.509448	0.0925278	0.129635
264251_at	At1g09190	Unique		3.30071	0.0124438	0.0038082	0.0337963		4.34504	0.814976	0.187565	0.207768		4.62704	0.257224	0.0555914	0.10961		4.88597	0.0910267	0.0186302	0.0617495
264262_at	At1g09200	Duplicate		9.90448	0.148151	0.0149266	0.0388616		11.3564	0.723723	0.063728	0.0749107		9.8743	2.65709	0.269091	0.165081		10.6497	0.617914	0.0580217	0.0738119
264260_at	At1g09210	Unique		9.44149	0.0910015	0.00952688	0.0319509		12.3089	0.0788689	0.00640745	0.0228156		10.6639	0.858519	0.080507	0.0868878		10.7637	0.141666	0.0131615	0.034968
264258_at	At1g09220	Unique		3.01769	0.00249545	0.000834205	0.0165539		5.56544	0.0465325	0.00836098	0.0387595		4.01902	0.105599	0.0262747	0.0808554		4.09642	0.1007	0.0245824	0.0774657
264257_at	At1g09230	Unique		3.8593	0.158702	0.0392676	0.103224		7.68152	0.00757135	0.000985658	0.0113276		5.88415	0.283993	0.0482641	0.0905671		6.79272	0.222634	0.0327753	0.0694627
264261_at	At1g09240	Duplicate		4.2404	0.582854	0.132523	0.180042		9.42749	0.143982	0.0152726	0.0402493		5.43144	4.44697	0.818745	0.388255		6.05496	0.620459	0.102471	0.13009
264264_at	At1g09250	Unique		5.37125	0.0423397	0.00802393	0.0383088		8.11748	0.0513777	0.00632926	0.0279232		6.66774	0.535346	0.0802889	0.109733		7.8126	0.678943	0.0869035	0.105468
264256_at	At1g09270	Duplicate		7.60068	0.0347389	0.00457805	0.024522		9.9213	0.0111356	0.00112239	0.0106362		8.88733	0.137033	0.0154189	0.0416525		9.30044	0.0331651	0.00356598	0.0195811
264265_at	At1g09280	Unique		5.63303	0.0152743	0.00271116	0.0219401		8.7039	0.0370226	0.00425356	0.0221065		7.09682	0.139327	0.0196323	0.0525961		7.72986	0.038369	0.00496374	0.0253407
264259_at	At1g09290	Unique		4.28131	0.00593837	0.00137357	0.0179994		7.03906	0.0420048	0.00596739	0.0291162		5.49195	0.144507	0.0263125	0.0692178		6.1032	0.0473249	0.0077541	0.035644
263707_at	At1g09300	Unique		4.67741	0.0380295	0.0079482	0.0416922		8.46905	0.0522028	0.00616395	0.0269782		5.61974	0.447228	0.0795816	0.119		6.04811	0.160282	0.0265012	0.0661946
263709_at	At1g09310	Duplicate		14.1031	0.0204341	0.00144988	0.0101359		13.7096	0.0112271	0.000818923	0.00772874		11.183	12.6296	1.12936	0.317787		14.2041	0.184164	0.0129656	0.0302127
263708_at	At1g09320	Unique		3.24479	0.0121188	0.00375289	0.0339268		7.04104	0.0204629	0.00290624	0.0203164		5.23494	0.467482	0.0893005	0.130608		5.02093	0.392624	0.0781975	0.124797
263710_at	At1g09330	Unique		8.29547	0.0101945	0.0012247	0.0121714		11.2133	0.0205955	0.0018367	0.0127983		9.2652	0.132061	0.0142535	0.0392223		9.28753	0.0424525	0.00457092	0.0221846
263676_at	At1g09340	Unique		13.5308	0.0121117	0.000897326	0.00813352		13.5163	0.0126974	0.000939414	0.00833681		10.6412	8.86058	0.832665	0.27973		13.3877	0.19225	0.0143602	0.0327513
264511_at	At1g09350	Duplicate		2.99574	0.0271784	0.00909686	0.0550311		8.79183	0.396643	0.045115	0.0716343		4.86664	0.352395	0.0724103	0.121979		6.11201	3.41883	0.559363	0.30252
264555_at	At1g09360	Unique		1.85468	0.000306819	0.000165976	0.00944437		3.33538	0.0345144	0.010348	0.0557		1.89518	0.0169683	0.00895341	0.0687336		2.33276	0.0273192	0.0117111	0.070854
264500_at	At1g09370	Unique		2.39239	0.00135566	0.000574317	0.0153902		2.50132	0.168928	0.0675356	0.164317		3.01371	1.78275	0.591547	0.443041		2.5145	0.007712	0.00306701	0.0349246
264505_at	At1g09380	Unique		1.68473	9.94243e-05	5.92273e-05	0.00591857		6.78943	0.0332884	0.00490298	0.0268728		4.42193	6.71447	1.51845	0.585995		4.2877	0.0279907	0.00652814	0.0390196
264501_at	At1g09390	Duplicate		5.46774	0.550748	0.103308	0.135728		8.00153	0.0602417	0.00752877	0.0306744		7.10399	0.800605	0.112698	0.125952		7.55607	0.870034	0.115144	0.123445
264502_at	At1g09400	Unique		2.22758	0.000466587	0.000210653	0.0096969		5.05836	0.0934032	0.0184651	0.0604187		2.5658	0.200719	0.0782288	0.174611		2.57622	0.0144127	0.00559449	0.0466003
264503_at	At1g09410	Duplicate		2.32123	0.000915402	0.000397148	0.0130343		3.18913	0.346347	0.108602	0.184537		3.21525	0.131179	0.0407991	0.112647		3.8455	0.0197602	0.00513852	0.0365546
264507_at	At1g09415	Unique		6.03579	0.30206	0.0490517	0.0910567		9.04708	0.0358558	0.00396324	0.0209301		7.11204	1.14346	0.160778	0.150355		8.95303	0.577443	0.0644969	0.0848759
264513_at	At1g09420	Unique		6.39935	1.17458	0.162642	0.169358		8.39403	2.38943	0.284659	0.184152		6.47957	1.64384	0.253696	0.197872		6.44388	0.328884	0.0510382	0.0889967
264504_at	At1g09430	Duplicate		7.25675	0.0640811	0.00874439	0.0348838		10.7853	0.0159955	0.00148309	0.0117265		9.24367	0.685426	0.0741508	0.0895645		9.85753	0.149603	0.0151765	0.0392376
264549_at	At1g09440	Duplicate		3.54496	0.00217766	0.000615814	0.0131639		5.86484	0.0735859	0.0125469	0.0462531		5.3356	0.994662	0.18642	0.186919		6.66177	0.205321	0.0308207	0.0680184
264550_at	At1g09450	Unique		2.41557	0.0209075	0.00847619	0.0598593		6.52013	0.0350338	0.00537317	0.028707		4.38969	1.86655	0.425214	0.311234		4.75823	0.227399	0.0477906	0.100219
264551_at	At1g09460	Unique		3.24266	0.0262854	0.00814504	0.0499983		6.33418	0.0543878	0.00858639	0.036818		5.45313	1.2739	0.233608	0.206977		4.599	0.40731	0.088565	0.138771
264552_at	At1g09470	Duplicate		2.76553	0.00828346	0.0030065	0.03291		3.23015	0.0518054	0.0160381	0.0704636		4.38478	0.766647	0.174843	0.199687		4.73077	0.0737719	0.0155941	0.0574135
264553_s_at	At1g09480	Unique		5.94589	0.0605896	0.010029	0.0413982		8.15444	0.166891	0.0204662	0.0500982		7.33215	0.285199	0.038897	0.0728354		8.36026	0.159974	0.0191351	0.0478416
264514_at	At1g09500	Tandem Duplicate		3.32579	0.787082	0.259479	0.266756		8.45211	1.20505	0.142574	0.129879		5.16006	6.49937	1.25955	0.494062		5.4742	3.63422	0.663882	0.348245
264554_at	At1g09510	Tandem Duplicate		2.14851	0.00203789	0.000950623	0.0210112		6.06057	0.0190367	0.00314107	0.0227657		3.16813	0.787797	0.248663	0.280158		3.4657	0.146977	0.0424091	0.11062
264509_at	At1g09520	Unique		4.90983	0.0458215	0.00925475	0.0435982		9.2942	0.0267929	0.00288275	0.0176116		6.81355	0.223331	0.0327775	0.0693587		7.09538	0.180658	0.0254614	0.0599036
264510_at	At1g09530	Unique		4.10158	0.169141	0.0379552	0.10027		7.75604	0.206812	0.0266646	0.0586337		5.68297	1.48119	0.260637	0.214156		7.05719	0.762008	0.107976	0.123694
264556_at	At1g09540	Duplicate		2.04375	0.000680268	0.000337263	0.0127618		6.25688	0.0750879	0.0120009	0.0437953		3.87284	3.38382	0.873731	0.474978		4.05191	0.0864799	0.021343	0.0725768
264557_at	At1g09550	Duplicate		2.12687	0.00195082	0.000936121	0.0207668		5.19988	0.186345	0.0358363	0.0830166		4.53616	1.6196	0.357043	0.280554		4.60195	0.0165218	0.00359018	0.027931
264506_at	At1g09560	Duplicate		7.91595	0.0582875	0.00741801	0.0304989		11.5871	0.064419	0.00555954	0.0219044		9.08077	1.71615	0.188987	0.144263		8.92702	0.356491	0.039934	0.0668833
264508_at	At1g09570	Duplicate		7.17331	0.101816	0.0139815	0.0444824		8.57312	0.0839256	0.00978938	0.0337916		8.88594	0.581844	0.0654791	0.085842		9.99285	0.254566	0.0254748	0.0504906
264512_at	At1g09575	Duplicate		2.84465	0.00670486	0.00239945	0.0287849		6.6954	0.0691705	0.0103311	0.0392812		5.6364	1.04053	0.18461	0.180978		6.10934	0.829338	0.135749	0.149064
264558_at	At1g09600	Duplicate		2.55634	0.0339528	0.0130496	0.0720807		5.93028	0.0597505	0.0100755	0.0412189		4.21282	2.1316	0.505979	0.346561		3.78525	0.0163713	0.00432503	0.0338024
264559_at	At1g09610	Duplicate		2.48568	0.000482092	0.00019494	0.00883324		4.96036	0.312922	0.0630845	0.112773		3.12527	1.86095	0.595453	0.436496		3.64428	0.0465004	0.0127598	0.059172
264705_at	At1g09620	Unique		9.16612	0.0208053	0.00225768	0.0157362		10.323	0.0450606	0.00436505	0.0205632		9.05499	0.301827	0.0333327	0.0606724		9.8138	0.075805	0.00772433	0.0280551
264669_at	At1g09630	Duplicate		7.32353	0.0582755	0.00809819	0.0329627		10.2384	0.0357089	0.00348776	0.0184569		7.90085	1.42058	0.179801	0.150855		8.02184	0.17551	0.0218791	0.0522249
264670_s_at	At1g09640	Duplicate		12.8206	0.00757488	0.000589711	0.00678858		13.2361	0.0101926	0.000770061	0.00762749		12.8363	0.311548	0.0242708	0.0434832		13.3223	0.0351388	0.0026376	0.0140707
264664_at	At1g09660	Unique		7.75884	0.0435402	0.00555934	0.0268936		8.72596	0.0349615	0.00400661	0.021428		7.64758	0.70846	0.0926384	0.110061		7.76709	0.285571	0.0367667	0.0688016
264665_at	At1g09670			7.66131	0.0344814	0.00449431	0.0242376		9.03074	0.0560714	0.00620895	0.0262209		7.19087	0.856807	0.119152	0.128724		7.58	0.176421	0.0232746	0.0554124
264666_at	At1g09680	Unique		3.97872	0.0203171	0.00512557	0.0358251		6.21079	0.510808	0.0822454	0.115075		6.00333	0.127294	0.0212039	0.0594308		6.92687	0.100622	0.0145264	0.0457942
264679_s_at	At1g09690	Duplicate		12.6657	0.0136823	0.00107992	0.00923528		12.506	0.0283318	0.00226545	0.0134592		12.7926	0.954994	0.0746519	0.0763907		13.1092	0.148964	0.0113633	0.0294418
264677_at	At1g09700	Unique		4.05809	0.0242101	0.00606119	0.0383422		5.65224	0.0144175	0.00255077	0.0212435		5.78817	0.160188	0.0276751	0.0691472		5.9516	0.0997933	0.0167675	0.0530783
264706_at	At1g09720	Unique		2.47958	0.00114709	0.00046569	0.013659		4.89834	0.047333	0.00966306	0.0444153		2.52704	0.0822785	0.0325592	0.113509		2.90541	0.0300905	0.0103567	0.0597044
264707_at	At1g09730	Unique		6.75254	0.0179805	0.00264671	0.0198579		8.26138	0.0489813	0.00592896	0.0267894		7.78525	0.11865	0.0152404	0.0442448		8.18256	0.0350174	0.00427951	0.0228693
264708_at	At1g09740	Unique		5.01037	0.138718	0.027683	0.0743356		8.3593	0.0971263	0.011619	0.0372819		6.08271	4.13909	0.680467	0.334468		6.79829	0.331193	0.048717	0.0846527
264672_at	At1g09750	Duplicate		11.0253	0.0308349	0.00276808	0.0159269		12.0132	0.044536	0.00370726	0.017567		9.35153	7.31044	0.781737	0.289127		11.2101	1.14203	0.101875	0.0953298
264678_at	At1g09760	Unique		7.28944	0.0153236	0.0020909	0.0169819		9.66062	0.0426349	0.00441327	0.0213736		7.90973	0.439481	0.055562	0.0838124		8.76893	0.0542403	0.00618551	0.0265592
264709_at	At1g09770	Unique		8.34082	0.0118951	0.00142114	0.013076		8.95077	0.102438	0.0114446	0.0357577		9.658	0.221736	0.0229588	0.0487563		9.48422	0.128711	0.013571	0.0378273
264668_at	At1g09780	Duplicate		10.4427	0.0621643	0.0059528	0.0238759		11.6335	0.0195891	0.00168386	0.0120309		10.0182	1.5879	0.158501	0.125783		10.2316	0.249228	0.0243587	0.0487927
264710_at	At1g09790	Duplicate		2.77936	0.00729096	0.00264443	0.0307219		6.9164	0.0455787	0.00658996	0.0308675		4.72053	2.65763	0.562994	0.345348		3.2089	0.0371335	0.0115721	0.060052
264673_at	At1g09795	Duplicate		9.40912	0.033701	0.00354253	0.0195107		10.326	0.192807	0.018672	0.0425237		8.99548	1.57905	0.175538	0.139693		9.19524	0.402129	0.0437323	0.0689636
264711_at	At1g09800	Unique		3.02108	0.0347192	0.0112384	0.0616768		7.58297	0.031136	0.00410604	0.0232698		4.60218	0.409607	0.0890029	0.139066		5.39168	0.115256	0.0213766	0.0629661
264712_at	At1g09810	Unique		5.92332	0.0193912	0.0032681	0.0235092		7.39695	0.0329173	0.00445013	0.0245279		6.82964	0.346877	0.05079	0.0862363		7.01719	0.150637	0.0214669	0.0553099
264674_at	At1g09815	Unique		7.60254	0.0301805	0.00396062	0.022851		10.1394	0.0468754	0.00462307	0.021353		8.54817	0.317254	0.0371137	0.0658917		9.44612	0.462303	0.048941	0.0719796
264713_at	At1g09820	Unique		5.41635	0.0251695	0.00469531	0.0292908		6.83434	0.0571039	0.00835545	0.0349652		5.98342	0.227327	0.0379928	0.0796848		6.46951	0.0825406	0.0127584	0.0444081
264675_at	At1g09830	Unique		8.08142	0.0572138	0.00711746	0.029598		9.24426	0.0370954	0.0040128	0.0208347		7.81835	0.549168	0.0702409	0.0947845		8.62534	0.151671	0.0175844	0.0451518
264686_at	At1g09840	Duplicate		6.75857	0.0359796	0.00533867	0.0280656		9.48453	0.149759	0.0157899	0.040802		8.20703	0.50186	0.06115	0.0863187		8.74617	0.123258	0.0140928	0.0401412
264687_at	At1g09850	Unique		7.87451	3.52368	0.455869	0.238383		10.5841	0.0332152	0.00313821	0.0172192		8.50911	1.79909	0.211431	0.157631		9.34851	0.356749	0.0381611	0.0638909
264676_at	At1g09870	Unique		6.50316	0.0199938	0.00304326	0.0217432		9.12121	0.0340777	0.0037361	0.0202387		7.88081	0.178345	0.0226303	0.053587		7.91145	0.100885	0.0127518	0.0401474
264688_at	At1g09890	Tandem Duplicate		2.68898	0.0144247	0.00532393	0.0446649		6.42188	0.0145242	0.00226167	0.0187665		3.52964	0.190648	0.0540134	0.123705		4.42513	0.126534	0.0285944	0.0803855
264689_at	At1g09900	Unique		8.1506	0.0344482	0.00427802	0.0227716		9.71248	0.0395962	0.00407684	0.0204879		7.55518	0.982301	0.130017	0.131183		9.10062	0.127079	0.0139638	0.0391711
264658_at	At1g09910	Duplicate		2.34747	0.224547	0.0880995	0.201862		7.62034	0.307324	0.0403294	0.0727485		7.17992	0.624245	0.0869431	0.110042		7.43055	0.262115	0.0352753	0.0689009
264671_at	At1g09920	Unique		6.70144	0.0106465	0.00156112	0.015397		9.7587	0.0215745	0.0022108	0.0150515		8.19593	0.137	0.0167157	0.0451609		8.44724	0.0706113	0.0083591	0.0314574
264659_at	At1g09930	Duplicate		2.52721	0.000553716	0.00022208	0.00931113		4.5013	0.125747	0.0279357	0.0787791		3.09194	0.910822	0.29458	0.308664		2.76808	0.00712519	0.00257405	0.0304944
264660_at	At1g09940	Duplicate		5.2437	0.172546	0.0336084	0.0792163		8.26479	0.0392722	0.00475175	0.0239779		7.67713	0.608194	0.0792215	0.101583		7.49553	0.2243	0.0299245	0.0631848
264661_at	At1g09950	Duplicate		2.16269	0.00438027	0.00202911	0.0306024		4.26879	0.233294	0.0546511	0.113148		4.0378	1.07526	0.266299	0.25681		3.2468	2.15299	0.663109	0.451923
264662_at	At1g09960	Duplicate		2.53033	0.0542258	0.021012	0.0920292		7.46216	0.0133982	0.00179548	0.0155116		5.82684	1.23403	0.211784	0.190647		5.34575	0.297044	0.0555664	0.101953
264663_at	At1g09970	Duplicate		7.16526	0.130236	0.0187658	0.0503655		11.6145	0.0335032	0.00288461	0.0157596		9.27067	2.65999	0.286925	0.175926		9.78229	1.08685	0.111104	0.106572
264667_s_at	At1g09980	Duplicate		7.48034	0.0280342	0.00366123	0.0223832		9.38749	0.192004	0.0204532	0.0466773		9.0397	0.139293	0.015409	0.0412867		9.62816	0.0571204	0.00593264	0.0248229
264518_at	At1g09990			3.33237	0.00507074	0.00151854	0.0213689		5.90862	0.242241	0.040998	0.0832987		5.4978	0.48589	0.0883789	0.126788		7.12549	0.113649	0.0159497	0.0473117
264519_at	At1g10000	Unique		2.21134	0.00522856	0.00235564	0.032699		6.18899	0.0416717	0.00673319	0.0329838		2.43956	0.197518	0.0809648	0.182176		3.15644	0.205009	0.0649495	0.143446
264520_at	At1g10010	Duplicate		1.87148	0.000905623	0.000497035	0.0160801		5.5592	0.0612278	0.0110138	0.0445104		3.45086	0.18222	0.0528044	0.123701		3.33931	0.178771	0.0535351	0.126617
264521_at	At1g10020	Duplicate		6.32068	0.0935662	0.0151981	0.0483945		8.16697	0.0194496	0.00238149	0.0170763		7.22652	0.987315	0.136624	0.137499		7.65039	1.41119	0.18446	0.155278
264523_at	At1g10030	Unique		7.66175	0.0132223	0.00173857	0.0150081		10.0147	0.0150967	0.00150745	0.0122688		8.11031	0.70893	0.087411	0.103816		7.9975	0.173799	0.0217316	0.0521278
264522_at	At1g10050	Unique		2.76133	0.0332921	0.0119064	0.0660773		7.34212	0.0450769	0.00613949	0.0289172		5.80602	0.877481	0.151133	0.161339		6.51872	0.675667	0.10365	0.126097
264525_at	At1g10060	Tandem Duplicate		4.24936	0.227393	0.0525105	0.112219		8.59245	0.0216426	0.00251879	0.0171213		6.3439	3.65543	0.576211	0.301379		6.56003	0.50526	0.0770209	0.108356
264524_at	At1g10070	Tandem Duplicate		2.90985	0.103535	0.0353294	0.110579		8.03681	0.194919	0.0242532	0.0549342		6.91379	4.34647	0.628666	0.301545		6.17202	1.71416	0.277731	0.212128
264515_at	At1g10080			5.97309	0.0936885	0.0154502	0.0512441		10.277	0.0723565	0.00704064	0.0261742		7.39511	0.662358	0.089567	0.110053		8.32766	1.36244	0.163604	0.140163
264516_at	At1g10090	Unique		4.36915	0.0329766	0.00767182	0.0415629		8.94684	0.0197465	0.0022071	0.0157064		6.21994	0.886167	0.142472	0.151346		8.06142	1.11038	0.13774	0.130715
257417_at	At1g10110	Unique		2.60076	2.50893	0.83463	0.609038		5.81912	1.54629	0.265725	0.213692		2.40357	0.116927	0.0486474	0.142266		3.19658	0.118668	0.0371233	0.107766
264517_at	At1g10120	Unique		4.92411	0.0766275	0.0153846	0.0562166		6.88817	0.0265524	0.00385479	0.0236564		6.78273	0.729916	0.107614	0.12596		7.07253	0.383134	0.0541721	0.0875186
264526_at	At1g10130	Unique		5.46144	0.0603468	0.0109089	0.0449801		8.89955	0.0450424	0.0050612	0.0238475		7.27936	0.395249	0.0542972	0.0863658		7.12057	0.117181	0.0164567	0.0480745
264467_at	At1g10140	Duplicate		3.10903	0.0142787	0.0047915	0.0384344		9.1829	0.144327	0.0157169	0.0413708		7.37072	3.84261	0.521334	0.265952		7.46406	1.03431	0.138572	0.136254
264463_at	At1g10150	Duplicate		7.0522	0.358092	0.0498133	0.0848541		9.48728	0.0186977	0.00197082	0.0144129		8.77763	0.594011	0.0676733	0.0878052		9.6946	0.376309	0.0388163	0.0632765
264459_at	At1g10160			2.18697	0.00925606	0.00420524	0.0439917		6.49546	0.521456	0.0802801	0.111173		4.26905	0.174913	0.0409722	0.0979668		5.16559	0.147452	0.028545	0.074337
264460_at	At1g10170	Unique		6.60909	0.0109084	0.00163983	0.015803		9.83328	0.246278	0.0250454	0.0504678		7.9805	0.310984	0.038968	0.0698777		8.59558	0.326945	0.0380364	0.0665216
264407_at	At1g10180	Unique		6.45506	0.020446	0.00320672	0.0221515		8.46345	0.0682228	0.00806088	0.0308615		7.67701	0.366126	0.0476913	0.0788176		8.26539	0.0497145	0.00601478	0.026976
264462_at	At1g10200	Unique		9.67621	0.186144	0.0190584	0.0445881		11.9859	0.082019	0.00684296	0.0238939		9.70069	1.34045	0.138181	0.11935		9.03033	0.502621	0.0556592	0.0785085
264405_at	At1g10210	Duplicate		2.60964	0.00305265	0.00117646	0.0211718		8.02429	0.165652	0.0206438	0.0507214		5.63835	0.569733	0.101046	0.13387		6.17412	0.25075	0.0406131	0.0811046
264465_at	At1g10230	Unique		6.53726	0.44125	0.0675857	0.101612		9.04803	0.0400966	0.00443153	0.0221309		7.03916	0.953635	0.135476	0.13873		7.30281	0.390647	0.0534927	0.0855859
264408_at	At1g10240	Unique		3.7944	0.00614831	0.00158474	0.020665		7.66118	0.0211898	0.00276586	0.0190006		5.5339	0.223354	0.040361	0.0854015		6.27638	0.214026	0.0341003	0.0737097
264450_s_at	At1g10250	Unique		3.92208	0.0211021	0.00544324	0.037038		6.56038	0.115214	0.0175621	0.0517397		6.10567	0.397821	0.0651561	0.103303		6.89536	0.116979	0.0169649	0.0496017
264451_s_at	At1g10260			3.20632	0.007067	0.00225043	0.0262187		3.24298	0.40816	0.12586	0.197002		4.19239	0.183198	0.0436976	0.102093		4.66396	0.154507	0.0331278	0.0842789
264452_at	At1g10270	Unique		6.13488	0.042457	0.00681475	0.0335868		8.30563	0.0797574	0.00960281	0.0340027		6.41415	0.619692	0.0966132	0.122729		6.42819	0.380781	0.059236	0.095995
264406_at	At1g10290	Duplicate		6.95893	0.0330267	0.0047477	0.026115		9.06846	0.0552564	0.00609326	0.0259214		7.89074	0.207812	0.0263362	0.057772		8.52687	0.0711467	0.00834382	0.0312815
264453_at	At1g10300	Duplicate		2.6966	0.00156696	0.000589072	0.0146795		3.85406	0.435575	0.113017	0.171243		3.87762	0.252836	0.0652041	0.129675		5.10497	0.0689197	0.0135005	0.0514255
264468_at	At1g10310	Unique		8.2421	0.0165187	0.00199664	0.0155937		9.80606	0.0216024	0.00220297	0.0149885		8.828	0.637215	0.0721812	0.0904234		9.31144	0.094955	0.0101977	0.0330935
264454_at	At1g10320	Unique		3.7958	0.180713	0.0462554	0.111993		5.66827	0.267708	0.0472292	0.091281		6.46819	0.1704	0.0263443	0.0638193		7.18563	0.0594931	0.00827945	0.0339444
264455_at	At1g10330	Unique		2.92674	0.0129077	0.00440873	0.0388186		6.50827	1.02174	0.156991	0.155312		5.26185	0.159482	0.0303091	0.0758958		6.15763	0.113795	0.0184804	0.0547833
264434_at	At1g10340	Duplicate		2.24678	0.00212068	0.000944959	0.0204964		8.58204	3.64375	0.424579	0.222425		5.8107	5.45333	0.938497	0.401885		5.77669	1.75034	0.303	0.229024
264464_at	At1g10350	Duplicate		6.67171	0.0127988	0.00191049	0.016957		9.18189	0.0315406	0.00343509	0.0193421		8.04082	0.200804	0.0249731	0.0557296		8.75836	0.0954662	0.0109	0.0352778
264435_at	At1g10360	Duplicate		8.98447	0.23306	0.0258069	0.053733		10.1447	0.182003	0.0179407	0.0420533		8.0395	2.94013	0.36571	0.213282		9.90135	0.359489	0.036307	0.0605547
264436_at	At1g10370	Unique		9.74104	0.276908	0.02902	0.054021		9.87126	0.190941	0.0193431	0.0442666		8.08958	2.04055	0.252244	0.176582		10.134	2.04183	0.201483	0.141003
264466_at	At1g10380	Unique		4.84858	0.927618	0.1876	0.198641		7.19583	0.106675	0.0148245	0.0453889		4.9605	2.66333	0.536908	0.328994		6.81682	0.206827	0.0303407	0.0667148
264456_at	At1g10390	Unique		7.89995	0.0403042	0.00507067	0.0254127		8.48726	0.036163	0.00426085	0.022406		8.9873	0.124246	0.0138246	0.0392204		8.91433	0.0739462	0.00829521	0.0305049
264457_at	At1g10400	Unique		2.60188	0.000739026	0.000286186	0.0104482		3.92127	0.24703	0.0629973	0.12675		3.9643	0.371234	0.0936444	0.153694		5.28225	0.0451393	0.00854547	0.0402215
264458_at	At1g10410	Duplicate		4.83917	0.140242	0.0283552	0.0773871		9.4501	0.019951	0.00211119	0.0149467		8.46446	0.820768	0.0969664	0.107031		8.81593	1.20301	0.136458	0.124413
263234_at	At1g10420	Unique		2.69623	0.00131748	0.000494568	0.0134621		3.19305	0.382103	0.119667	0.193591		2.99764	0.0795086	0.0265237	0.0940648		3.24609	0.0207916	0.00640512	0.0444205
263235_at	At1g10430	Duplicate		7.93399	0.0229141	0.00289141	0.0190792		9.58087	0.0223244	0.0023301	0.015595		8.36212	0.0638985	0.00764142	0.0302293		8.79772	0.044565	0.00506552	0.0239953
263211_at	At1g10460	Unique		2.06179	0.00126655	0.000627281	0.017261		5.01704	0.189422	0.0377558	0.0867498		4.95712	0.646221	0.130362	0.162166		4.95585	0.0205502	0.00414666	0.0289261
263236_at	At1g10470	Unique		10.5332	0.016971	0.00162067	0.0123679		11.5007	0.0729706	0.00634487	0.0234881		9.80307	1.72703	0.176173	0.134057		10.3284	0.854425	0.0827259	0.0894962
263208_at	At1g10480	Unique		2.43036	0.000601304	0.000248891	0.0100896		7.06046	0.0522847	0.00740528	0.0323858		3.23962	1.96151	0.605475	0.432316		4.36932	0.0530899	0.0121506	0.0527342
263255_at	At1g10490	Duplicate		7.02713	0.0347877	0.00496144	0.0265421		8.83895	0.100657	0.0113879	0.0358939		6.97038	0.477773	0.0685434	0.0991641		7.01566	0.200661	0.0286018	0.0638502
263256_at	At1g10500	Unique		9.05451	0.0131655	0.00145964	0.0126723		11.9381	0.0137536	0.00115207	0.00982362		9.52415	0.670928	0.070445	0.0860027		9.86967	0.0720666	0.00730183	0.0271997
263212_at	At1g10510	Unique		8.70083	0.0210105	0.00241029	0.0166593		8.99846	0.00659882	0.000733328	0.00902745		7.79941	0.693916	0.0889703	0.106805		9.57335	0.103748	0.0108372	0.0336454
263257_at	At1g10520	Unique		2.49502	0.000495742	0.000198727	0.00892388		2.66172	0.116429	0.0437422	0.128194		2.96007	0.0507733	0.0171528	0.076123		2.91316	0.00621715	0.00213416	0.0270664
263209_at	At1g10522	Unique		9.45429	0.0698356	0.0073765	0.0279518		10.9564	0.0357956	0.00326711	0.0172683		7.5465	2.76259	0.366076	0.220248		8.84682	0.43935	0.049662	0.0749236
257450_at	At1g10530	Duplicate		1.95229	0.000851841	0.000436725	0.0149497		3.84945	0.0477117	0.0123944	0.0567432		3.03963	0.308324	0.101435	0.182676		3.47644	0.0899709	0.0258802	0.0862813
263258_at	At1g10540	Duplicate		2.1872	0.000430346	0.000198051	0.00948465		6.18138	0.0327269	0.00529443	0.0292663		5.19313	4.82463	0.929041	0.422963		4.5066	0.0460272	0.0102133	0.0476057
263207_at	At1g10550	Unique		3.88272	0.198309	0.0583596	0.114693		6.21909	0.666622	0.10719	0.131284		5.38683	1.60242	0.29747	0.234993		6.10516	0.453875	0.0743428	0.11035
263259_at	At1g10560	Duplicate		2.35661	0.00285841	0.00122102	0.0226868		6.63766	0.0717775	0.0108137	0.0403626		4.72545	0.975361	0.206406	0.208997		5.00239	0.446461	0.0892497	0.133572
263260_at	At1g10570	Duplicate		4.97718	0.0866421	0.0173378	0.0591399		7.63646	0.171702	0.0224845	0.054262		7.29974	0.10098	0.0138334	0.0435322		7.83463	0.0944049	0.0120497	0.0392174
263261_at	At1g10580	Unique		6.08835	0.00532158	0.000876456	0.0119818		8.71102	0.0257763	0.00295904	0.0184307		7.52984	0.154687	0.0205432	0.0522326		7.39807	0.150283	0.0203138	0.0524007
263210_at	At1g10585	Unique		2.61718	0.00162704	0.000632539	0.0154122		9.09087	0.296946	0.0326642	0.0599423		3.76856	1.06238	0.281905	0.273504		5.3542	2.29067	0.427827	0.282675
263206_at	At1g10590	Duplicate		10.1918	0.0196339	0.00193719	0.0137483		11.8196	0.141933	0.0120083	0.0318743		11.0292	0.166062	0.0150566	0.0369481		11.2861	0.0585497	0.00518777	0.0214397
263237_at	At1g10610	Unique		3.56961	0.0156165	0.0044121	0.0350083		6.17724	0.0444921	0.00720258	0.0341465		5.51655	0.33156	0.0601027	0.104379		6.69182	0.135091	0.0201874	0.0549248
261830_at	At1g10620	Unique		2.16393	0.00060807	0.000282352	0.0113955		2.56317	0.0877677	0.0342419	0.115582		2.55939	3.02492	1.18189	0.679548		2.00113	0.00365877	0.00182835	0.0302267
261831_at	At1g10630	Duplicate		9.97264	0.00984564	0.000982338	0.00994975		11.7314	0.0117688	0.00100319	0.00924734		10.6492	0.571705	0.0536854	0.071002		10.7324	0.0532353	0.00496025	0.0214983
261834_at	At1g10640	Unique		5.14248	0.621989	0.115912	0.153362		8.25008	0.267963	0.03248	0.062745		6.59236	6.84947	1.039	0.396998		7.80728	1.09154	0.13981	0.13382
261832_at	At1g10650	Duplicate		7.36278	0.0856079	0.0116577	0.0397388		8.25335	0.0380912	0.00461524	0.0236473		8.24506	0.402759	0.0488485	0.0769712		8.63982	0.301075	0.0348474	0.0635086
257477_at	At1g10660	Unique		6.48874	0.0474778	0.00736862	0.0335803		9.12122	0.0340147	0.00372918	0.02022		7.92009	0.594581	0.0750725	0.0973588		8.31305	0.106849	0.0128532	0.0393211
261833_at	At1g10670	Duplicate		10.9318	0.0158727	0.00144892	0.0115248		11.6841	0.0313613	0.0026841	0.0151566		11.4154	0.484158	0.0424127	0.060954		11.013	0.0478277	0.00434282	0.0198579
261829_at	At1g10680	Duplicate		2.25152	0.000826593	0.000369035	0.0127694		2.37465	0.0444825	0.0187322	0.0888168		3.29501	1.07624	0.326628	0.314846		2.83497	0.015242	0.00537643	0.0435484
262788_at	At1g10690	Unique		2.81342	0.0250541	0.00888498	0.0562607		7.02526	0.171877	0.0244656	0.0590129		5.09223	0.685075	0.134533	0.16254		5.1443	0.156487	0.0304195	0.0768976
262762_at	At1g10700	Unique		6.38154	0.0416165	0.00647226	0.0319674		9.55808	0.0120065	0.00125616	0.011464		7.40475	0.651266	0.0879525	0.108986		8.34724	0.199264	0.0238718	0.0534776
262792_at	At1g10710	Unique		2.20275	0.0012987	0.00058895	0.0163603		6.18037	0.0261927	0.00423805	0.0261864		3.2324	0.125502	0.0388262	0.109597		3.63161	0.0448988	0.0123633	0.058347
262761_at	At1g10720	Unique		4.25657	0.0192657	0.00445115	0.0326087		8.74403	0.0118791	0.00135854	0.0124647		7.31069	0.285477	0.0390493	0.0730848		7.80992	0.100657	0.0128884	0.0406234
262787_at	At1g10730	Duplicate		3.45587	0.0188659	0.00540802	0.0397449		7.25984	0.611557	0.0842384	0.107719		6.54547	0.229184	0.0350142	0.0731395		6.76758	0.141763	0.0209474	0.055635
262786_at	At1g10740	Duplicate		7.5652	0.0938253	0.012745	0.0404892		8.5726	0.0394432	0.00460108	0.0231672		7.68964	0.846168	0.11004	0.119625		8.33803	0.30433	0.0364991	0.0661621
262785_at	At1g10750	Unique		2.20317	0.0162	0.00733824	0.0577708		6.26055	0.0530633	0.00847582	0.0367946		4.36416	1.12846	0.258574	0.243412		4.39636	0.407136	0.0926075	0.145136
262784_at	At1g10760	Unique		9.68692	0.205032	0.0206003	0.0467439		12.2956	0.208921	0.0169915	0.0371742		9.5535	1.98859	0.208153	0.147608		11.2822	2.08391	0.184708	0.127952
262760_at	At1g10770	Duplicate		2.31842	0.000613788	0.000266177	0.0106861		6.6039	0.0284492	0.00430794	0.0255408		5.24491	9.99951	1.90652	0.602909		4.02325	1.00522	0.249853	0.249204
262758_at	At1g10780	Unique		3.46565	0.258469	0.0702597	0.146697		7.26339	0.0278546	0.00383493	0.0229778		4.93521	2.48598	0.503724	0.31948		4.59419	0.414217	0.0901611	0.140089
262759_at	At1g10800	Unique		3.28874	0.00366442	0.00112579	0.0184066		5.92524	0.036683	0.00619097	0.0323241		4.12081	0.207838	0.0504362	0.110632		5.10482	0.0557176	0.0109147	0.0462398
262789_at	At1g10810	Duplicate		2.32938	0.000437163	0.000188318	0.00897597		4.37995	0.0187354	0.00427753	0.0312508		2.63991	0.478074	0.181095	0.261914		2.83349	0.0184646	0.00651655	0.0479565
262791_at	At1g10830	Unique		8.59995	0.0245026	0.00286956	0.0182016		9.76922	0.00840462	0.000860316	0.00938424		7.65467	0.876316	0.114481	0.122294		9.48218	0.0773879	0.00816141	0.0293379
262790_at	At1g10840	Unique		9.34885	0.0423409	0.00456425	0.0220101		11.0366	0.00557671	0.000505292	0.00676633		9.66414	0.218817	0.0226421	0.0484035		10.2377	0.100422	0.00980898	0.0309535
262783_at	At1g10850			6.29148	0.04473	0.00702778	0.0336161		7.54635	0.0174162	0.0023079	0.017488		6.27695	2.23155	0.355515	0.237988		7.03118	0.550172	0.0782475	0.105492
260469_at	At1g10870	Duplicate		5.98785	0.0140594	0.00232815	0.0198021		7.81574	0.0685805	0.00877466	0.0335066		7.44797	0.27197	0.036516	0.0700201		7.63639	0.051748	0.0067765	0.0297892
260473_at	At1g10880	Unique		2.8125	0.00347202	0.00125298	0.0209507		5.51227	0.0360708	0.00654373	0.0344546		3.51587	0.10189	0.02898	0.0907888		3.69791	0.0351828	0.00951425	0.0507235
260467_at	At1g10890	Unique		2.44576	0.000966116	0.000400503	0.0127087		6.41031	0.0464525	0.00724653	0.0336221		2.80491	0.072284	0.0257706	0.0958523		2.81553	0.00918493	0.00326224	0.0340391
260466_at	At1g10900	Duplicate		6.48204	0.118783	0.0183186	0.0531699		8.14374	0.0462241	0.00567603	0.0264004		6.93333	1.07099	0.15447	0.149263		9.08282	0.33515	0.0368993	0.063738
260465_at	At1g10910	Unique		7.2033	0.322714	0.0440944	0.0788638		8.69112	0.238866	0.0274839	0.0562343		7.45427	0.65521	0.0878972	0.108589		8.90478	0.1602	0.0179903	0.0449477
260464_at	At1g10920	Unique		2.96389	0.0594463	0.0206542	0.0822622		7.12006	0.446503	0.0627105	0.0938487		4.61715	0.429557	0.0930351	0.14195		5.50634	0.168406	0.0305839	0.0745273
260463_at	At1g10930	Unique		4.94076	0.0260848	0.00529809	0.0326888		7.40225	0.0950978	0.0128472	0.0416602		5.08745	0.637479	0.125304	0.15694		6.37962	0.1467	0.0229951	0.0600371
260480_at	At1g10940	Duplicate		5.72108	0.625518	0.112752	0.138243		9.56777	0.658362	0.0688105	0.0848051		8.0784	0.210306	0.0260331	0.0567676		8.61932	0.0481193	0.00558273	0.02545
260482_at	At1g10950	Unique		8.87297	0.0147594	0.00168407	0.0136919		11.2387	0.0108019	0.000961132	0.00924771		9.66902	0.175979	0.0182003	0.0433858		9.90238	0.115941	0.0117084	0.0343857
260481_at	At1g10960	Duplicate		13.1224	0.0102976	0.000785376	0.00773315		13.1835	0.0149544	0.00113433	0.00927586		11.3537	3.55589	0.313192	0.166087		13.6072	0.381532	0.0280389	0.0453938
260462_at	At1g10970	Duplicate		2.10578	0.0131242	0.0061581	0.0544032		8.34943	0.0417545	0.00500088	0.0244734		5.64297	1.75628	0.311233	0.234849		4.50619	0.478389	0.106163	0.15349
260461_at	At1g10980	Duplicate		2.08281	0.000398743	0.000192368	0.0095873		6.0663	0.128588	0.0211971	0.0591121		3.96292	1.50068	0.378681	0.309122		3.99871	0.0666679	0.0166724	0.0645712
260472_at	At1g10990	Unique		2.54621	0.0131604	0.00513209	0.0450547		7.18341	0.15593	0.0217069	0.054971		5.15527	1.38691	0.269028	0.228441		5.97996	0.706884	0.118209	0.140597
260483_at	At1g11000	Unique		3.3075	0.00294448	0.000889435	0.0164061		4.23192	0.178583	0.0421992	0.0998581		6.6313	0.909782	0.137195	0.143837		6.87798	0.177216	0.0257657	0.0612055
260479_at	At1g11020	Unique		5.47949	0.0241527	0.00442532	0.0283624		8.93909	0.00314703	0.000352052	0.00627563		7.69061	0.190541	0.0247758	0.0567589		8.03701	0.059647	0.00742154	0.0303878
260478_at	At1g11040	Unique		2.65543	0.00427511	0.00163224	0.0246229		5.48417	0.0776887	0.014166	0.0508239		3.00573	1.3751	0.457494	0.390138		3.75622	0.0661419	0.0176086	0.0684679
260477_at	At1g11050	Unique		2.88697	0.0135136	0.00495016	0.0402664		8.60198	0.0373576	0.00434291	0.0224694		6.75145	1.10926	0.1643	0.155998		6.91365	1.1353	0.164212	0.154116
260476_at	At1g11060	Duplicate		3.82255	0.0149594	0.00384063	0.0319967		7.75038	0.038518	0.00496982	0.0253226		6.07901	0.146314	0.0240687	0.0629231		6.43894	0.0359708	0.00558644	0.0294551
260471_at	At1g11070	Unique		3.46745	0.183591	0.0546049	0.123571		4.99103	0.1094	0.0219193	0.0662702		3.96726	0.775789	0.195548	0.222014		3.88929	0.044807	0.0115206	0.0544255
260475_at	At1g11080	Duplicate		2.56924	0.00111836	0.000441202	0.0130162		6.70279	0.123312	0.0183971	0.0523898		5.08653	3.63646	0.714919	0.374902		5.45334	0.46896	0.0859951	0.125576
260474_at	At1g11090	Unique		4.35871	0.082941	0.0195766	0.0660734		8.18776	0.0276078	0.00337184	0.0202932		6.62493	0.200202	0.0302195	0.0675388		7.33838	0.205771	0.0280403	0.0618146
260468_at	At1g11100	Duplicate		2.43384	0.00159519	0.000660253	0.0164103		6.32659	0.0149342	0.00236054	0.0193162		3.75668	0.568824	0.151416	0.200763		4.73464	0.342844	0.0724118	0.123669
260470_at	At1g11120	Unique		2.21274	0.00184302	0.000833772	0.0194015		6.33556	0.00483908	0.000763797	0.0109799		4.14214	0.632507	0.152701	0.192003		4.8213	0.0736311	0.015272	0.0562816
262479_at	At1g11130	Unique		2.97531	0.0681718	0.022349	0.0877546		6.66658	0.0495125	0.00742697	0.0333775		4.10535	1.85768	0.452503	0.331998		5.81242	0.387892	0.066735	0.107151
262451_at	At1g11140			6.86683	0.0158994	0.00229718	0.0183626		7.97706	0.0358053	0.00448853	0.0237209		6.97163	1.71941	0.246629	0.188085		8.15634	0.31349	0.0384351	0.0686461
262449_at	At1g11160	Duplicate		2.53803	0.000605659	0.000240318	0.00969654		5.28551	0.034773	0.00657894	0.0352805		3.65902	0.431268	0.117864	0.179477		3.63732	0.0394691	0.0108512	0.0546194
262478_at	At1g11170	Duplicate		3.47198	0.0116365	0.00337336	0.0310695		7.03641	0.0927588	0.0131827	0.0432839		6.15112	4.73212	0.76931	0.35365		5.84975	0.614229	0.105001	0.133976
262454_at	At1g11190	Duplicate		3.4729	0.0487175	0.0140925	0.0635552		7.09001	0.12536	0.0176812	0.0499381		6.44685	4.55387	0.70637	0.331011		6.40018	0.308534	0.0482071	0.0867879
262457_at	At1g11200	Duplicate		6.03347	0.0716733	0.0118643	0.0443723		10.4998	0.0503856	0.00479873	0.0213783		7.53853	0.137932	0.0182969	0.0492659		7.54528	0.174209	0.0230885	0.0553172
262452_at	At1g11210	Unique		2.18072	0.00533226	0.00243364	0.0334854		10.2682	0.0397158	0.00386783	0.0194082		6.3725	2.106	0.330482	0.22773		6.17287	6.79452	1.10071	0.422272
262477_at	At1g11220	Tandem Duplicate		2.54055	0.000271313	0.000106918	0.00648347		5.11397	0.379096	0.0741295	0.120397		4.06699	0.334065	0.0821405	0.142116		4.19151	0.261473	0.0623816	0.121995
262453_at	At1g11240	Unique		6.80382	0.0483781	0.00704909	0.0323275		8.91752	0.0851747	0.00955139	0.0327274		7.28474	0.460145	0.0631656	0.0931179		7.50997	0.0648956	0.00864125	0.033921
262511_at	At1g11250	Duplicate		2.58058	0.00160428	0.000629583	0.0155211		5.54988	0.0446432	0.00804399	0.038071		4.10263	2.085	0.50821	0.351958		4.24846	0.0284593	0.00669873	0.0397082
262456_at	At1g11260	Duplicate		8.28032	0.31725	0.0382793	0.0680226		11.062	0.228402	0.0206475	0.0432033		10.0467	2.18124	0.21711	0.147004		10.9776	1.08591	0.09892	0.0949265
262510_at	At1g11270	Unique		2.60634	0.479502	0.16861	0.265683		5.88167	0.503412	0.08559	0.120632		5.49342	0.219157	0.0398945	0.0852187		5.58856	0.161888	0.0289678	0.0719959
262458_at	At1g11280	Duplicate		5.47934	4.65413	0.777645	0.393723		7.59922	2.55813	0.33663	0.210471		8.13195	0.334053	0.0410791	0.0710744		8.91097	0.140351	0.0157504	0.0420419
262509_at	At1g11290	Unique		4.22049	0.0860598	0.0203344	0.0695083		7.43555	0.0518043	0.00696711	0.0306105		4.60558	0.645506	0.140157	0.174448		6.154	0.227698	0.037	0.0775394
262508_at	At1g11300	Unique		5.69858	0.073293	0.0129053	0.0475078		6.75665	0.336725	0.0498361	0.0858828		4.38481	2.2487	0.512838	0.341991		5.9467	0.254339	0.0427699	0.0848069
262455_at	At1g11310	Duplicate		7.61035	0.0672641	0.00887091	0.034079		11.2824	0.085702	0.00759605	0.0259473		9.03612	1.48909	0.164793	0.135045		9.80895	0.313548	0.0319655	0.057086
262450_at	At1g11320	Unique		3.74611	0.0011986	0.000318884	0.00924179		7.9634	0.348131	0.0437164	0.0740923		5.70789	0.0753525	0.0132015	0.048092		6.31706	0.0487113	0.00771106	0.0349381
262507_at	At1g11330	Duplicate		5.26513	0.0541938	0.0104006	0.0442146		9.32729	0.329069	0.0352802	0.0615018		7.27848	0.849153	0.116666	0.126605		7.63311	0.482129	0.0631629	0.0909663
262480_at	At1g11340	Duplicate		3.3052	0.00398035	0.0012144	0.0190881		5.82113	0.0125876	0.0021624	0.0192737		3.78524	0.294021	0.0776755	0.14325		4.39522	0.164208	0.0373605	0.0921968
261873_at	At1g11350	Duplicate		6.00588	0.0750196	0.0125997	0.0456048		8.07179	0.0718795	0.00890503	0.0332149		5.94011	3.14536	0.529512	0.298566		7.85438	0.324242	0.0412818	0.0724975
261828_at	At1g11360	Unique		7.5778	0.0154767	0.00204302	0.0164171		9.07934	0.116776	0.0128617	0.0376376		9.21875	0.351893	0.0381714	0.0643477		9.61311	0.0779113	0.0081047	0.029036
261849_at	At1g11370	Unique		2.14268	0.000556056	0.000260495	0.0110053		3.43919	0.0973465	0.0283051	0.0907202		2.10109	0.0586347	0.0279068	0.115248		2.0983	0.00896363	0.00427185	0.0451205
261822_at	At1g11380	Unique		5.03888	0.460294	0.0913025	0.134643		8.18241	0.048705	0.0059524	0.0269715		6.71022	1.11537	0.166219	0.157388		7.1895	0.56228	0.0782086	0.104298
261818_at	At1g11390	Duplicate		5.23367	0.00819681	0.0015628	0.0172988		7.27116	0.0308994	0.00424958	0.0241753		6.32964	0.277205	0.0437947	0.0831804		6.73568	0.302334	0.0448855	0.0816324
261823_at	At1g11400	Unique		5.62197	0.0411052	0.00717927	0.0360628		7.63013	0.0130074	0.00170474	0.0149473		7.09413	0.443985	0.0625849	0.0939259		7.26701	0.0902338	0.0124169	0.0413361
261819_at	At1g11410	Duplicate		6.3019	0.0631409	0.00999125	0.0398735		7.45044	0.029557	0.00396714	0.0230753		6.56082	2.04819	0.312185	0.218136		8.43784	0.18107	0.0214592	0.0504303
261820_at	At1g11420	Unique		2.71096	0.00783171	0.00289691	0.0326442		6.40706	0.0110904	0.00173096	0.0164367		4.73224	1.53131	0.323591	0.261496		4.11973	0.0875276	0.021246	0.0718131
261824_at	At1g11430	Unique		11.1567	0.0105905	0.000945781	0.00922407		12.3321	0.00665104	0.000539326	0.00661312		10.1933	1.19579	0.117312	0.107279		10.9022	0.0904282	0.00829446	0.0275827
261871_at	At1g11440	Unique		6.62758	0.0962215	0.0147021	0.0468038		9.15036	0.0024844	0.000271508	0.00544719		7.23463	0.39267	0.0542764	0.0866158		7.78981	0.267716	0.0343675	0.0664217
261868_s_at	At1g11460	Duplicate		2.55711	0.0073261	0.00290745	0.0334724		5.03366	0.190007	0.0377473	0.0865965		3.44913	2.20834	0.64026	0.430847		3.6655	0.164311	0.0448263	0.110586
261869_at	At1g11470	Unique		2.4013	0.00785618	0.00331139	0.0369113		5.63946	0.168028	0.029795	0.0726863		3.09009	0.0611032	0.0197739	0.0799947		3.18138	0.0264452	0.0083125	0.0511162
261827_at	At1g11480	Unique		6.4901	0.00843861	0.00131968	0.0141542		8.47766	0.0384474	0.00453515	0.023129		8.57484	0.325742	0.0379881	0.0665596		8.732	0.0976455	0.0111825	0.035786
261872_s_at	At1g11520	Unique		7.76577	0.019212	0.00247662	0.0178485		8.47051	0.0565086	0.00667122	0.0280639		9.06462	0.177848	0.01962	0.0465238		9.90384	0.0677531	0.00684109	0.0262822
261821_at	At1g11530	Unique		8.46059	0.0827165	0.00967585	0.0339935		10.8582	0.361484	0.0332914	0.0553716		9.03586	1.8493	0.204662	0.150499		10.169	0.365993	0.0359911	0.0594921
261846_at	At1g11540	Unique		2.54887	0.000988147	0.000392789	0.0123328		6.90799	0.0568032	0.00822283	0.0345013		4.89928	0.884497	0.180536	0.191962		5.33951	0.232143	0.0434764	0.0902352
261825_at	At1g11545	Duplicate		9.12843	0.0946051	0.0103506	0.0336947		9.43398	0.0445647	0.00472385	0.0223769		7.5914	3.6484	0.480597	0.251611		7.15822	1.62077	0.226421	0.177851
261847_at	At1g11560	Duplicate		2.03855	0.000968202	0.000476536	0.0152638		5.73687	0.034379	0.00599264	0.03232		2.71949	0.149146	0.0548435	0.14201		3.01613	0.0949588	0.0314837	0.102169
261870_at	At1g11570	Unique		2.011	0.00138033	0.00068809	0.0184748		6.48122	0.0462466	0.00713548	0.0331805		2.2722	0.368928	0.162366	0.267316		2.19605	0.0410872	0.0187096	0.0923019
261826_at	At1g11580	Unique		6.88554	0.928125	0.136962	0.139915		10.2931	0.219202	0.0212961	0.0454859		8.04192	3.46327	0.430653	0.231411		8.71652	1.09722	0.125878	0.120172
261848_at	At1g11590	Duplicate		2.81325	0.0020113	0.000727673	0.0159415		2.33397	0.346526	0.14847	0.252216		3.5906	0.791202	0.220354	0.247729		3.5362	0.0299023	0.00845604	0.0489007
262819_at	At1g11600	Unique		4.11003	0.100351	0.0238889	0.0770754		7.37566	0.0422536	0.00572879	0.0278696		5.30067	4.09382	0.772321	0.38171		7.28682	0.441262	0.0605562	0.0911612
262815_at	At1g11610	Duplicate		2.4689	0.00129364	0.000528068	0.0145681		3.89948	0.0672031	0.0172339	0.0664795		2.55613	0.383925	0.150198	0.242404		2.75395	0.0526379	0.0191136	0.0833093
262822_at	At1g11630	Duplicate		5.33221	0.0279477	0.00526881	0.031352		7.58633	0.0406038	0.00535223	0.0265614		6.54152	0.11153	0.0170496	0.0510526		7.07804	0.0932875	0.0131799	0.0431518
262824_at	At1g11650	Unique		10.7902	0.0110471	0.00102688	0.00974081		11.9943	0.0149543	0.00124679	0.0101955		11.2386	0.0698148	0.00621206	0.0235105		11.9583	0.0472625	0.00395227	0.0181798
262814_at	At1g11660	Unique		7.04113	0.0659807	0.00930755	0.0364809		8.53756	0.0675921	0.00791703	0.0304519		8.29785	0.165936	0.0199975	0.0490914		8.62356	0.120809	0.0140092	0.0403054
262813_at	At1g11670	Duplicate		7.39586	0.139217	0.0188892	0.0504496		7.10809	0.214984	0.0302449	0.0652304		7.14281	2.53269	0.354579	0.222803		6.66192	0.56232	0.0844082	0.112562
262820_at	At1g11680	Unique		8.82289	0.0287998	0.00327244	0.0192346		10.3478	0.00962875	0.000930508	0.00948277		9.63428	0.266829	0.0276958	0.0536163		9.90515	0.0552409	0.00557699	0.0237285
262812_at	At1g11690	Unique		3.76869	0.0122325	0.00332845	0.0293473		3.16452	0.347996	0.109968	0.186414		4.28858	0.21347	0.0497764	0.107735		5.57202	0.0601392	0.0107931	0.0440115
262811_at	At1g11700	Duplicate		5.58521	0.126749	0.0219001	0.063743		6.90696	0.165528	0.0239654	0.0589045		7.05334	1.3485	0.191187	0.164639		8.24127	0.714086	0.0866476	0.102537
262810_at	At1g11710	Unique		3.20081	0.00108964	0.000343093	0.0103129		4.97562	0.101346	0.0203686	0.0639819		4.17047	0.101251	0.024278	0.0762982		5.77752	0.0649799	0.011247	0.0441213
262809_at	At1g11720	Unique		8.45021	0.0276545	0.00327677	0.0196796		8.85628	0.182979	0.020661	0.0483003		7.21611	1.58841	0.22012	0.174654		9.4263	0.34854	0.0369753	0.0626304
262808_at	At1g11730	Duplicate		2.42762	0.00185938	0.000779976	0.0177625		6.31725	0.0611452	0.00967909	0.0391429		5.11769	0.942378	0.184141	0.189687		5.27138	0.0775359	0.0147088	0.0528235
262807_at	At1g11740	Unique		3.25131	0.00368298	0.00115628	0.0186656		5.59886	0.0639225	0.0114171	0.0451572		4.29846	0.127197	0.0295914	0.0829709		4.68016	0.0238339	0.00509254	0.0329865
262823_at	At1g11750	Unique		10.2113	0.0316271	0.0030938	0.0174161		11.5514	0.0146713	0.00127009	0.0104858		9.2306	0.882441	0.0955995	0.101768		10.2109	0.055295	0.00541527	0.0230291
262818_at	At1g11760	Unique		5.64499	0.0269743	0.00473033	0.0290946		8.84325	0.0314049	0.00355129	0.0200395		6.80574	0.452544	0.0664945	0.0988451		7.30323	0.0498261	0.00682247	0.0305642
262817_at	At1g11770	Unique		2.7591	0.00144031	0.000527931	0.013755		4.52157	0.0652642	0.014434	0.0565		3.83447	4.24392	1.10678	0.537253		3.4414	0.0356474	0.0103584	0.0548629
262816_at	At1g11780	Unique		6.5373	0.0309845	0.00473454	0.0269261		8.69296	0.00543793	0.000625556	0.008483		6.18059	0.30208	0.0488755	0.0889264		7.02125	0.111508	0.0158815	0.0475596
262825_at	At1g11790	Duplicate		8.35938	0.0483138	0.00570233	0.0262943		10.2043	0.0377138	0.00369586	0.0190312		8.20526	0.736305	0.0897358	0.104577		9.09436	0.0992596	0.0109144	0.0346429
262821_at	At1g11800	Unique		7.11253	0.0452126	0.00650124	0.0298955		8.70887	0.158112	0.0181553	0.0456585		7.5036	0.283764	0.0378171	0.070992		7.78972	0.0453876	0.00582659	0.0273493
264397_at	At1g11820	Duplicate		8.72448	0.0409436	0.00462288	0.0231928		9.68375	0.050414	0.00520604	0.0231863		8.42819	0.878465	0.104229	0.111206		9.69026	0.265492	0.0273978	0.0531729
264372_at	At1g11840	Unique		10.1172	0.128252	0.012703	0.0353973		12.6433	0.0389008	0.00307678	0.0155997		11.4782	0.532957	0.0464319	0.063602		11.5529	0.242684	0.0210064	0.0426413
264343_at	At1g11850	Unique		8.69803	0.535338	0.0611492	0.0841188		8.68948	1.43479	0.165118	0.137848		8.13682	7.8822	0.968708	0.34504		8.80464	0.590347	0.0670495	0.0872654
264394_at	At1g11860	Unique		13.061	0.0135476	0.00103215	0.00891155		12.9718	0.0302301	0.00233045	0.0134036		11.2384	2.04547	0.182007	0.12726		13.2119	0.269884	0.0204273	0.0393207
264350_at	At1g11870	Unique		7.77368	0.0940245	0.0119998	0.0394452		9.03668	0.0515653	0.00570622	0.0251287		7.2663	0.910114	0.125251	0.131291		8.41324	0.0780446	0.00927641	0.0332054
264393_at	At1g11880	Unique		2.12914	0.0582905	0.0261401	0.113395		6.32538	1.39354	0.22031	0.186627		4.91442	0.124504	0.0253344	0.0717991		4.62711	0.179148	0.0387171	0.0914737
264373_at	At1g11890	Unique		7.82853	0.0188884	0.00243188	0.0175557		11.2518	0.0163935	0.00145697	0.0113793		9.12663	0.103163	0.0113035	0.0351926		9.60843	0.0542182	0.00564277	0.0242337
264392_at	At1g11900	Unique		3.5241	0.0673322	0.0190275	0.0736314		6.93513	0.0221822	0.00319853	0.0214757		5.76939	0.101799	0.0176447	0.0553022		6.52417	0.0670942	0.010284	0.0397025
264344_at	At1g11910	Duplicate		11.3934	0.0232045	0.00204184	0.0133701		13.1816	0.00948721	0.000719732	0.00738927		13.0688	0.38485	0.029448	0.047469		13.1815	0.157209	0.0119265	0.0300797
264345_at	At1g11915	Unique		2.45978	0.000751348	0.000308645	0.0111436		4.22596	0.224989	0.0532399	0.112242		2.79446	0.109248	0.0390943	0.118279		3.14446	0.0187733	0.00597028	0.0435737
264391_at	At1g11920	Duplicate		1.70398	0.0034625	0.00203148	0.0345327		2.47607	0.0740965	0.029925	0.109935		2.92808	0.279843	0.095572	0.180665		2.82213	0.017053	0.00604262	0.0462726
264349_at	At1g11930	Duplicate		9.03389	0.0562613	0.00624061	0.0262561		10.5626	0.0295667	0.00279918	0.0162791		9.52891	0.17331	0.0181878	0.0436886		10.0675	0.0695126	0.00690468	0.0261886
257422_at	At1g11940	Duplicate		3.12344	0.07296	0.0226536	0.0864788		7.1266	0.0773037	0.0108472	0.0390138		5.66046	0.467406	0.0825739	0.12078		6.29198	0.285322	0.045347	0.0848947
264390_at	At1g11950	Duplicate		3.85099	0.0368548	0.00966598	0.049851		6.78254	0.0887002	0.0130777	0.0439106		5.92468	0.411486	0.0694528	0.108271		5.92803	0.141451	0.0238614	0.0634443
264389_at	At1g11960	Unique		2.57591	0.0133007	0.00505516	0.044772		7.56008	0.0324655	0.00429433	0.0238333		6.21786	1.12092	0.180274	0.170273		5.96177	2.07114	0.347404	0.241396
264388_at	At1g11970	Unique		3.09139	0.00343458	0.00112488	0.0189576		3.11784	0.325083	0.104266	0.18287		3.5956	0.132182	0.0367622	0.101115		4.37858	0.0292477	0.00667971	0.0390582
264387_at	At1g11990	Duplicate		2.26325	0.000395372	0.000176069	0.00878559		3.77499	0.303981	0.080525	0.146052		3.16144	1.9666	0.622059	0.443581		2.84294	0.0145151	0.00510566	0.0423782
264386_at	At1g12000	Duplicate		8.79793	0.042881	0.00488537	0.0235371		9.92175	0.0526646	0.005308	0.0231298		9.35109	1.92242	0.205582	0.148273		9.54466	0.303825	0.0318319	0.0577498
264346_at	At1g12010	Duplicate		2.00172	0.000369093	0.000184671	0.00959762		3.05448	0.605922	0.198371	0.254842		5.54959	10.2999	1.85598	0.578304		6.49305	0.59124	0.0910574	0.118422
264385_at	At1g12020	Unique		5.56733	0.128402	0.0234585	0.0643633		8.56321	0.0529578	0.00618434	0.0268738		6.03427	0.838744	0.138997	0.151771		6.6442	0.639848	0.0963017	0.120391
257421_at	At1g12030	Unique		2.36483	0.00045272	0.000192475	0.00899736		3.57925	0.35233	0.0984367	0.165837		3.575	1.19052	0.333014	0.305206		4.35007	0.417243	0.0959164	0.14849
264347_at	At1g12040	Unique		2.96606	0.0306089	0.010256	0.0589854		3.58786	0.204792	0.0570792	0.126131		3.4346	1.30025	0.378573	0.331999		3.49837	0.0409068	0.0116931	0.0578138
264396_at	At1g12050	Unique		7.29352	0.228113	0.0309948	0.0654843		9.89213	0.0381601	0.00385762	0.0197476		8.17989	0.951795	0.116358	0.119268		8.65274	0.191179	0.0220946	0.050532
264395_at	At1g12070	Duplicate		2.13917	0.000455019	0.000213618	0.0099717		4.72193	0.0306644	0.00649404	0.037085		3.48578	3.22395	0.924885	0.515103		2.95723	0.0370185	0.012518	0.0650616
264342_at	At1g12080	Unique		5.79301	0.899566	0.151905	0.163724		7.35883	0.125038	0.0169915	0.048052		8.71033	4.88937	0.56133	0.253859		7.51296	0.41857	0.055713	0.0861138
264371_at	At1g12090	Duplicate		12.5672	0.0399981	0.00317446	0.0159141		13.8935	0.0201047	0.00144706	0.0102056		11.6515	3.31422	0.284446	0.156246		13.0998	0.303991	0.0232059	0.0420889
264370_at	At1g12100	Unique		2.56713	0.00213318	0.000830644	0.0179914		5.95986	0.0366429	0.00614829	0.0321188		2.94342	0.31441	0.106818	0.190501		3.11465	0.102292	0.0328421	0.102686
264348_at	At1g12110	Duplicate		9.2415	0.0434879	0.00468031	0.0225653		9.48285	0.11251	0.0118646	0.0353718		9.09579	3.26009	0.358418	0.198506		10.7757	0.284155	0.0263701	0.049469
260995_at	At1g12120	Unique		7.0114	0.0495357	0.00699108	0.0317435		8.93737	0.0476623	0.00533293	0.0244275		8.7389	0.11949	0.0136734	0.0395557		9.65841	0.297446	0.0307966	0.0564675
260994_at	At1g12130	Tandem Duplicate		2.45399	0.00063861	0.000261595	0.0102978		2.39143	0.137623	0.0575486	0.155127		2.66864	1.1214	0.420215	0.396818		2.47841	0.00691976	0.00279202	0.0335639
260993_at	At1g12140	Tandem Duplicate		8.3787	0.0321372	0.0038208	0.0213957		10.1082	0.027856	0.00275577	0.0165114		8.75673	1.25548	0.143374	0.127957		8.99672	0.0805262	0.00895062	0.0315416
260992_at	At1g12150	Unique		3.84433	0.0143581	0.00380279	0.0311693		2.35923	0.138636	0.0587632	0.157822		4.92465	1.00984	0.205058	0.204057		4.8921	0.0544462	0.0111294	0.0476967
260991_at	At1g12160	Duplicate		2.47394	0.00029227	0.00012131	0.00691039		5.70938	0.626133	0.109667	0.138594		5.33639	1.89621	0.355336	0.258045		4.90343	0.130565	0.0266272	0.0736907
260990_at	At1g12180	Unique		3.27322	0.00248947	0.00077199	0.0152433		3.24622	0.0990925	0.0305255	0.0969712		4.92202	1.12505	0.228576	0.215498		5.01585	0.00992689	0.00197911	0.0198638
261024_at	At1g12190	Duplicate		2.3124	0.000561961	0.000245168	0.0102516		4.62606	0.0549294	0.0118739	0.0506631		2.83119	0.0753361	0.0266094	0.0969467		2.8582	0.0278141	0.00973135	0.0583499
261023_at	At1g12200	Duplicate		5.14674	0.222701	0.0422105	0.0916915		7.80705	0.0316208	0.00405029	0.0227772		6.89671	3.01643	0.437371	0.251828		7.10826	1.23434	0.173649	0.156298
260996_at	At1g12210	Tandem Duplicate		2.17089	0.0011663	0.000543726	0.0157314		6.30393	0.0945537	0.0149992	0.0487784		3.52664	0.172875	0.0490198	0.117898		3.65323	0.106548	0.0291655	0.0893504
260966_at	At1g12220	Tandem Duplicate		2.59585	0.00835407	0.00320649	0.0352102		6.39792	1.29892	0.203022	0.178136		4.45933	1.12776	0.252899	0.238143		5.50694	0.477186	0.0866517	0.125439
260967_at	At1g12230	Unique		9.07422	0.190754	0.0208447	0.0481313		9.20421	0.386911	0.0420363	0.0675801		9.50495	0.983057	0.103426	0.104313		10.5193	0.113227	0.0107637	0.0319881
260969_at	At1g12240	Duplicate		9.37168	0.0766158	0.00824595	0.0295353		10.1423	0.11176	0.0110192	0.0329616		9.93728	1.33457	0.134299	0.116252		10.7069	0.704904	0.0658363	0.0784152
260968_at	At1g12250	Unique		9.49589	0.0920245	0.00965247	0.031946		10.799	0.0927001	0.00858412	0.0281939		7.95815	2.57026	0.322973	0.201454		10.592	0.120363	0.0113636	0.0327543
261022_at	At1g12260	Duplicate		2.71401	0.00675976	0.00250821	0.0302939		5.71855	0.0872387	0.0152554	0.0516498		3.57321	0.577669	0.161666	0.212706		3.44428	0.0502308	0.0145838	0.0650709
259519_at	At1g12270	Duplicate		7.86481	0.0386693	0.00489983	0.0250031		8.83609	0.0356178	0.00403094	0.0213586		8.31736	0.755146	0.0907916	0.104479		8.80893	0.122183	0.0138704	0.039681
259535_at	At1g12280	Tandem Duplicate		4.06793	0.032419	0.0080214	0.0442615		7.43021	0.0212702	0.00286267	0.0196284		5.45047	1.11867	0.205243	0.194052		6.94027	0.235255	0.033897	0.0698864
259534_at	At1g12290	Tandem Duplicate		2.5482	0.000754449	0.000298621	0.0107791		6.87619	0.122718	0.0178468	0.0509455		4.91498	0.640671	0.130351	0.162853		4.93332	0.162921	0.0330246	0.081818
259538_at	At1g12310	Duplicate		9.40309	0.0161766	0.00171762	0.0135261		11.2412	0.0249344	0.00221812	0.0140471		10.4572	0.370429	0.0354234	0.058202		10.042	0.0720017	0.00717004	0.0267208
259520_at	At1g12320	Duplicate		3.43968	0.554488	0.153141	0.216485		7.4168	0.0707611	0.00954065	0.0358658		5.64519	1.12999	0.200169	0.188304		6.95652	0.26644	0.0383007	0.0742006
259528_at	At1g12330	Unique		6.18512	0.457697	0.0715077	0.109381		6.88317	0.0150789	0.00219069	0.01784		6.82081	2.56154	0.375548	0.234647		7.58441	0.222916	0.0293914	0.0622514
257513_s_at	At1g12340	Unique		6.57696	0.0406987	0.00609205	0.0306736		9.40166	0.00500492	0.000532344	0.00752478		7.91812	0.262471	0.0331481	0.0647021		7.64974	0.0426669	0.00557756	0.0270022
259512_at	At1g12360	Duplicate		6.88733	0.0230542	0.00333966	0.0220457		9.41143	0.0511045	0.00543004	0.0240201		9.16954	0.289338	0.0315542	0.0586617		9.67554	0.0750915	0.00776096	0.0283217
259537_at	At1g12370	Unique		5.18021	0.152729	0.0294641	0.075442		5.71442	0.112267	0.0196462	0.0586345		6.15287	1.22471	0.199047	0.179862		6.49255	0.30411	0.0468398	0.0849376
259529_at	At1g12400	Unique		5.181	0.555869	0.110357	0.143904		9.0108	1.83434	0.203571	0.150306		8.09756	0.213493	0.0263651	0.0570608		7.79835	0.223313	0.0286359	0.0605974
259521_at	At1g12410	Unique		10.8373	0.00433459	0.000399434	0.00607512		11.8709	0.0118969	0.00100218	0.00918821		9.99864	0.748805	0.0748907	0.0865453		11.4312	0.022146	0.00193733	0.0130184
259513_at	At1g12430	Duplicate		6.07299	0.0541057	0.00887654	0.0383018		7.8834	0.126315	0.016023	0.0450832		7.62505	0.694925	0.091137	0.109327		8.01277	0.171095	0.0213527	0.0516221
259530_at	At1g12450	Duplicate		4.02482	0.042691	0.0110383	0.051336		8.09317	0.0477684	0.00590231	0.0270055		6.91614	1.31712	0.190441	0.165939		6.7846	0.22928	0.0337942	0.0705763
259531_at	At1g12460	Duplicate		5.85389	0.0148974	0.00255702	0.0208502		7.12086	0.00896944	0.0012596	0.0133		5.58232	0.928223	0.166279	0.172588		6.21933	0.395951	0.0636646	0.101176
259532_at	At1g12470	Unique		6.36888	0.0289761	0.00455986	0.0267274		8.70604	0.0555322	0.00637858	0.0270677		8.10277	0.0998938	0.0123283	0.0390064		8.42701	0.0551965	0.00654995	0.0278793
259514_at	At1g12480	Unique		1.81433	0.00329094	0.00180359	0.0316186		7.04641	0.00508782	0.000722044	0.0101227		3.12357	0.575048	0.184099	0.242773		4.40693	0.633694	0.143795	0.180636
259522_at	At1g12490	Duplicate		2.80385	0.00152543	0.000549702	0.0139297		3.62201	0.547893	0.151268	0.204361		3.31856	0.237144	0.0714597	0.146742		3.71321	0.0499866	0.0134618	0.0602112
259523_at	At1g12500	Unique		8.15258	0.0533708	0.0066986	0.0283372		9.54552	0.0394927	0.00413731	0.020819		7.84815	1.5803	0.20136	0.160178		8.60051	0.592861	0.0689332	0.0895266
259511_at	At1g12520	Unique		9.89544	0.210758	0.0209102	0.0463934		7.70712	0.0471778	0.00612133	0.0281823		8.97681	1.49563	0.16661	0.136235		7.52312	0.374408	0.0497677	0.0813345
259533_at	At1g12530	Unique		5.13487	0.215745	0.039561	0.0904567		8.49195	0.148698	0.0175104	0.0454093		7.66481	0.109939	0.0143434	0.0432589		8.07051	0.0511425	0.00633696	0.0280214
259524_at	At1g12550	Duplicate		4.2437	0.411004	0.0959555	0.15107		7.81011	0.338171	0.0432991	0.0744579		6.30091	0.591705	0.0939078	0.122081		6.58011	0.145258	0.0220754	0.0579212
259525_at	At1g12560	Duplicate		1.9328	0.125751	0.0623797	0.183471		5.56759	0.0985601	0.0177025	0.0563876		2.67443	2.92838	1.09496	0.639857		2.70042	0.0350134	0.0129659	0.0692924
259526_at	At1g12570	Duplicate		2.3784	0.010137	0.0042614	0.0423322		6.25546	0.190545	0.0304606	0.0697814		5.51673	4.71693	0.855023	0.393684		4.61786	0.683971	0.148114	0.179093
259484_at	At1g12580	Unique		5.75151	0.0204086	0.00364294	0.0248385		8.23288	0.0565055	0.0068634	0.0288731		7.17791	0.556752	0.0775647	0.103952		7.87115	0.393289	0.0499659	0.0796742
259527_at	At1g12600	Duplicate		2.38198	0.00299636	0.0013008	0.0229805		5.09021	0.188641	0.0370596	0.0853262		5.09449	2.10736	0.413655	0.28495		5.04927	0.0870135	0.0172329	0.0584204
255937_at	At1g12610	Duplicate		2.4037	0.000565774	0.000236658	0.00989559		3.34104	0.19732	0.0590594	0.132955		4.36353	3.19155	0.731416	0.409415		3.22911	3.45743	1.07071	0.575829
255938_at	At1g12620	Duplicate		4.16112	0.0147695	0.00356609	0.029206		4.63997	0.632431	0.136301	0.171392		5.13519	0.119125	0.0231977	0.0672116		6.39649	0.0700385	0.0109495	0.0413739
255927_at	At1g12630	Unique		2.54333	0.00196271	0.000776773	0.0174191		6.34698	0.0870864	0.0137209	0.0464952		3.32403	0.21809	0.0656101	0.140492		4.10893	0.0236397	0.00575326	0.037419
255928_at	At1g12640	Duplicate		6.9211	0.236199	0.0345861	0.0702205		9.25334	0.375265	0.0405546	0.0662019		8.65894	0.743905	0.0859118	0.0996079		8.81736	0.0827359	0.0093833	0.0326218
255929_at	At1g12650	Unique		6.99206	0.0950578	0.0137033	0.044095		8.15015	0.111515	0.0136825	0.0409732		7.65139	0.278278	0.0363697	0.0689445		7.63691	0.114048	0.0149338	0.0442208
255930_at	At1g12660	Unique		2.3844	0.000792737	0.000335373	0.0118082		4.94228	0.0639758	0.0129446	0.0511776		3.38508	0.0959124	0.0283338	0.0914888		3.51978	0.0403816	0.0114728	0.0570921
255936_at	At1g12680	Unique		4.5801	0.012044	0.00260861	0.0239614		9.12841	0.00914927	0.00100229	0.0104785		7.3576	0.351577	0.0477842	0.0805886		7.49473	0.0655982	0.00875258	0.0341735
255935_at	At1g12700	Unique		2.81025	0.00715536	0.00256792	0.0301003		5.991	0.0829155	0.01384	0.0480638		3.67368	0.158925	0.0432604	0.108516		4.50265	0.0751312	0.016686	0.0608754
255931_at	At1g12710	Duplicate		3.89642	0.217421	0.0566596	0.11967		9.60573	0.274925	0.028621	0.0545855		6.59624	0.479289	0.0726609	0.104955		5.23385	1.97712	0.377758	0.268656
255932_at	At1g12720			2.86148	0.0144315	0.00503918	0.0419822		5.65624	0.0556829	0.00984451	0.0417189		3.32651	0.117668	0.0353728	0.103119		4.51438	0.0557751	0.012355	0.0523146
255939_at	At1g12730	Duplicate		2.14457	0.0473804	0.0223023	0.101498		7.60771	0.929754	0.122212	0.126745		5.36848	0.296854	0.0552958	0.101489		5.74401	0.342015	0.0595429	0.101814
255934_at	At1g12740	Unique		2.38888	0.000805126	0.000339625	0.0118779		2.973	0.0924812	0.031107	0.10229		2.93619	2.34679	0.799261	0.521738		2.86545	0.082858	0.0289162	0.100456
255933_at	At1g12750	Duplicate		5.43932	0.800448	0.149318	0.164483		9.13458	0.365012	0.0399593	0.0661401		7.63608	0.784697	0.102762	0.116006		8.15848	0.246738	0.0302432	0.0608848
261194_at	At1g12770	Unique		3.70661	0.00642159	0.00175463	0.0216195		4.43112	0.0130943	0.00295508	0.0258243		5.11616	0.198482	0.0387951	0.0870796		5.63547	0.0793938	0.0140882	0.0499993
261211_at	At1g12780	Duplicate		7.98526	0.307415	0.0377402	0.0694342		10.1355	0.0491604	0.00485029	0.0218756		10.4325	1.76403	0.169089	0.12731		10.4309	0.468678	0.0449317	0.065632
261205_at	At1g12790	Unique		2.2831	0.194255	0.0819346	0.193047		7.20398	0.230964	0.0320606	0.0667114		4.66503	0.16426	0.0352109	0.0868783		4.21895	0.100046	0.0237134	0.0749712
261206_at	At1g12800	Unique		10.566	0.01193	0.00113065	0.0103374		10.9505	0.0510013	0.00465745	0.0206233		9.32631	2.8579	0.306434	0.181265		11.4047	0.112992	0.00990752	0.0294741
261209_at	At1g12810	Unique		5.26953	0.0271861	0.00513425	0.0312897		9.14696	0.047283	0.00516926	0.0237726		7.15124	0.540237	0.0755445	0.10278		7.10027	0.149879	0.021109	0.0545251
261195_at	At1g12820	Duplicate		7.30358	0.0436864	0.00593287	0.0286179		9.67815	0.0169943	0.00175594	0.0134697		7.81316	0.638839	0.0817644	0.102298		8.66677	0.123239	0.0142197	0.0405058
261207_at	At1g12830	Unique		6.03372	0.0153739	0.00255895	0.0205498		8.22938	0.0110585	0.00134378	0.0127785		7.09684	0.621186	0.08753	0.111057		8.02866	0.17358	0.0216201	0.0518928
261210_at	At1g12840	Unique		10.5745	0.00916508	0.000865417	0.00905332		12.3994	0.0108561	0.000875533	0.00840301		10.6708	0.158526	0.014856	0.0373124		11.2435	0.0411824	0.00366277	0.018049
261203_at	At1g12845	Unique		6.11389	0.811358	0.123614	0.147329		11.2805	0.0250302	0.00221889	0.014025		7.31484	3.19442	0.436703	0.244338		7.32806	1.86428	0.254403	0.186323
261201_at	At1g12850	Unique		6.92119	0.172877	0.0246901	0.0600742		10.0382	0.28593	0.0284841	0.0532688		8.12712	0.217423	0.0267528	0.0573741		8.24462	0.07536	0.0091405	0.0332966
261196_at	At1g12860	Unique		8.25619	0.19322	0.0228759	0.0532411		9.58585	0.0167332	0.00174561	0.0134945		7.21205	3.24726	0.450254	0.249861		9.29326	0.186601	0.0200791	0.0464824
261212_at	At1g12880	Duplicate		4.84598	0.0344868	0.00720577	0.0383217		6.68683	0.0863736	0.012917	0.0439511		7.34048	1.10031	0.149896	0.1429		8.3779	0.305928	0.0365161	0.0660199
261197_at	At1g12900	Duplicate		13.9109	0.00248917	0.000179146	0.0035865		13.8016	0.0220462	0.00159737	0.0107582		11.7534	8.73185	0.742924	0.251415		14.2825	0.181132	0.0126821	0.0297985
261202_at	At1g12910	Duplicate		7.7506	0.035624	0.00463132	0.0243521		10.3499	0.15251	0.0147354	0.0377324		8.91357	0.111277	0.012484	0.037424		9.25929	0.0785851	0.00848717	0.0302756
261208_at	At1g12930	Unique		5.51508	0.0769547	0.013933	0.0502997		7.89751	0.0702546	0.00889579	0.0335619		6.64766	0.382214	0.057496	0.0930004		7.36952	0.0868806	0.0117892	0.0399965
261198_at	At1g12940	Duplicate		1.97709	0.000357794	0.000181928	0.0095673		6.3044	0.136329	0.0216245	0.0585667		2.30666	0.940732	0.407833	0.420484		2.29726	0.0197577	0.00860055	0.0611868
261199_at	At1g12950	Duplicate		1.92846	0.00059099	0.000307179	0.012606		6.02921	0.050171	0.00832131	0.0371506		3.06102	1.54531	0.504833	0.406107		3.6124	0.0583059	0.0161405	0.0668437
261200_at	At1g12960	Duplicate		3.05726	0.00479911	0.00158745	0.0226594		5.21061	0.0945779	0.018151	0.059021		4.41222	0.074349	0.0168507	0.0617989		4.35264	0.0345348	0.00793422	0.0426949
261213_at	At1g12970	Duplicate		2.33191	0.00118707	0.000507036	0.0147749		7.87859	0.025219	0.00320095	0.0201565		5.21643	0.537428	0.103026	0.140536		4.75628	0.105702	0.0222237	0.0683557
262768_at	At1g12990	Duplicate		5.25558	0.129738	0.0251137	0.0685351		9.67192	0.076612	0.00792107	0.0286178		6.58696	0.881228	0.133784	0.142514		7.56784	0.346286	0.0457576	0.0777581
262775_at	At1g13000	Duplicate		4.50027	0.0121698	0.00269847	0.0245133		9.0759	0.0153475	0.00169102	0.0136499		7.05356	0.529317	0.0750425	0.103145		7.17481	0.32386	0.0451385	0.0793173
262776_at	At1g13020	Duplicate		5.79063	0.0165102	0.00279563	0.0221896		8.48574	0.0216041	0.00254593	0.0173212		7.31031	0.149762	0.0204864	0.0529377		7.90052	0.128348	0.0162456	0.0453461
262777_at	At1g13030	Unique		5.50096	0.0641652	0.0114831	0.0460481		7.81293	0.0755922	0.00967527	0.0351904		5.9218	0.84678	0.142994	0.155393		6.64692	0.187915	0.0282709	0.0652168
257465_at	At1g13040	Unique		2.28691	0.00140142	0.000611942	0.0163695		4.40739	0.126595	0.0287233	0.0807284		3.25012	0.0938726	0.0288828	0.0942693		3.6855	0.0953776	0.0258791	0.0837967
262778_at	At1g13050	Duplicate		1.97533	0.00260015	0.0013065	0.0258142		6.61349	0.0260752	0.00394273	0.0244165		3.90144	0.274925	0.0704676	0.134395		4.64497	0.0719472	0.0154893	0.0577463
262781_s_at	At1g13060	Duplicate		10.2217	0.0193916	0.00188947	0.0136234		12.1533	0.00170092	0.000139955	0.0033935		10.8747	0.275078	0.0252952	0.0482292		11.1371	0.0636993	0.00571953	0.0226617
262779_at	At1g13070			2.2782	0.000443852	0.000196375	0.00924755		5.42832	0.019746	0.00363759	0.0258866		3.81105	1.01921	0.267434	0.264903		4.27549	0.0363063	0.00849173	0.0445662
262826_at	At1g13080	Tandem Duplicate		8.07306	0.810959	0.102277	0.111548		8.71675	0.243924	0.0279834	0.0566595		8.24103	1.92835	0.233994	0.168504		9.71241	1.21663	0.125266	0.113567
262780_at	At1g13090	Tandem Duplicate		6.95829	0.0739365	0.0104756	0.0390775		9.37506	0.118741	0.0126656	0.0367558		7.83626	0.848552	0.108285	0.117552		9.81631	0.3529	0.0359504	0.060517
262827_at	At1g13100	Tandem Duplicate		3.86613	0.0802204	0.0204508	0.0732599		7.19894	0.0562233	0.00780993	0.0329374		4.64792	1.27447	0.274202	0.242888		6.36468	0.262593	0.0412579	0.0805129
262793_at	At1g13110	Tandem Duplicate		8.36717	0.0352552	0.00413775	0.0224405		11.1606	0.0203952	0.00182743	0.0127961		7.49916	8.33227	1.11109	0.384919		10.2006	0.43416	0.042562	0.0645948
262794_at	At1g13120	Unique		6.09141	0.0430392	0.00682254	0.0340576		8.47365	0.0802178	0.00946673	0.0334245		7.4396	0.183105	0.0246122	0.0575176		7.57731	0.0636512	0.00840024	0.0332957
262795_at	At1g13130	Duplicate		2.36644	0.00332831	0.00142556	0.024379		4.24524	0.11812	0.027824	0.0809578		4.31066	1.27168	0.295008	0.261604		4.52507	0.0904668	0.0199923	0.066469
262764_at	At1g13140	Tandem Duplicate		2.28531	0.00314216	0.00138467	0.0245284		5.32234	0.0456945	0.00858541	0.0401633		4.1056	3.0741	0.748757	0.427053		3.5597	0.0983742	0.0276355	0.0881104
262765_at	At1g13150	Tandem Duplicate		2.74104	0.011214	0.00409227	0.0386335		5.03557	0.197942	0.0393087	0.0883527		3.77508	1.88999	0.500649	0.36417		2.97507	0.0268535	0.00902619	0.0550813
262766_at	At1g13160	Unique		7.57854	0.0199515	0.00266045	0.0186381		7.79949	0.0881047	0.0112962	0.0380569		7.42862	0.414071	0.05574	0.0866222		7.78567	0.196938	0.0252949	0.0569992
262767_at	At1g13170	Unique		5.4513	0.0141652	0.00259325	0.0218329		8.07255	0.0342346	0.00424087	0.0229204		6.79092	0.368574	0.0542745	0.0893992		6.9802	0.0924612	0.0132462	0.0435624
262769_at	At1g13180	Unique		5.60293	0.0175496	0.00317988	0.0236438		8.71836	0.0314208	0.00360398	0.0203317		7.01564	0.246052	0.0350719	0.0707044		7.50138	0.146928	0.0195868	0.0510988
262770_at	At1g13190	Unique		6.66762	0.00541611	0.000813075	0.0110376		8.84881	0.0224721	0.00253956	0.0169409		8.08792	0.126543	0.015646	0.0439828		8.72202	0.0729026	0.00835845	0.0309567
262782_at	At1g13195	Duplicate		4.9655	0.0471211	0.00945882	0.0437165		8.35259	0.0109487	0.00131081	0.0125274		7.22626	0.411755	0.0569804	0.0887986		7.30481	0.176689	0.024188	0.0575434
262771_at	At1g13200	Duplicate		2.51135	0.0103794	0.00421158	0.0405675		5.00165	0.0577384	0.0115439	0.0480418		2.73081	0.129815	0.0475371	0.131938		2.96951	0.0177573	0.00597987	0.0448749
262772_at	At1g13210	Duplicate		3.74983	0.051815	0.013878	0.0607039		10.545	0.0285885	0.00271108	0.0160342		6.48561	2.35158	0.362584	0.236444		6.71811	0.808413	0.120333	0.133835
262773_at	At1g13220	Unique		4.24029	0.0322011	0.00764444	0.0423194		6.49583	0.142322	0.0219098	0.0580767		6.54491	0.441405	0.0674426	0.101512		7.26266	0.0535146	0.00736846	0.0318523
262774_at	At1g13230	Duplicate		2.76592	0.0016479	0.000605347	0.0146766		4.91793	0.139296	0.0283241	0.0758905		3.24873	0.462378	0.142326	0.209308		3.28009	0.0342817	0.0104514	0.0564476
259358_at	At1g13250	Duplicate		6.51848	0.110208	0.0169631	0.0509284		9.35719	0.0347503	0.00371375	0.019922		7.53819	0.993867	0.131844	0.13225		7.53308	0.231737	0.0307626	0.0639036
259364_at	At1g13260	Duplicate		5.24414	0.439308	0.0829509	0.126389		9.83229	0.182734	0.0185851	0.0434766		8.29233	3.53578	0.426392	0.22676		9.21599	2.08966	0.226743	0.156854
259363_at	At1g13270	Unique		10.0487	0.0430698	0.00424809	0.0206526		11.3325	0.0102388	0.000903492	0.00892892		8.57904	3.02891	0.353059	0.202864		9.75878	0.808338	0.0828318	0.0921299
259366_at	At1g13280	Duplicate		4.27777	0.206437	0.0471331	0.106213		10.4423	0.266091	0.0254819	0.0493988		8.95005	2.30725	0.257792	0.169716		8.86245	0.357056	0.0402886	0.0674239
257515_at	At1g13290	Unique		2.70313	0.000568513	0.000211794	0.0088207		5.67568	0.125129	0.0220466	0.0623249		3.8392	0.437839	0.114044	0.172352		3.70363	0.0356935	0.00963742	0.0510113
259365_at	At1g13300	Duplicate		2.6303	0.0227232	0.00906956	0.0573098		4.31797	0.164502	0.0380972	0.0939305		4.0625	5.93041	1.45979	0.599444		4.28398	0.394006	0.0919718	0.146522
259360_at	At1g13310	Unique		3.41399	0.00707926	0.0021127	0.0246452		3.11317	0.384315	0.123448	0.199132		4.01644	0.243134	0.0605346	0.122767		4.34832	0.15799	0.0363335	0.0914099
259407_at	At1g13320	Duplicate		8.8429	0.00459484	0.000517386	0.0076655		10.6808	0.0149185	0.00139676	0.0114356		9.4363	0.0482649	0.00511481	0.0232817		9.8166	0.010109	0.00102979	0.0102422
259409_at	At1g13330	Unique		3.54997	0.00615038	0.00175907	0.0220915		4.92661	0.129383	0.0262621	0.0730113		4.5038	0.452316	0.10043	0.149328		5.0431	0.937721	0.185942	0.192017
259410_at	At1g13340	Unique		2.32129	0.00144164	0.000623317	0.0163568		8.60377	0.0517434	0.00601404	0.0264386		6.34122	3.3049	0.521177	0.286686		5.08891	1.11587	0.219275	0.207578
259362_s_at	At1g13350	Unique		6.6595	0.211063	0.0322941	0.0689865		8.4105	0.109453	0.0130138	0.0393361		8.24519	0.321046	0.0389374	0.06872		9.45189	0.0588269	0.00622382	0.0256607
259387_at	At1g13370	Duplicate		2.75682	0.00153917	0.000562963	0.014231		4.60108	0.437689	0.0951273	0.143788		3.08748	0.179267	0.0580627	0.137134		3.68028	0.0716853	0.0194782	0.0727501
259357_at	At1g13380	Unique		7.96178	0.00566369	0.000721576	0.00945234		10.0687	0.00598839	0.000594755	0.00768569		8.10577	1.21666	0.150098	0.136079		8.59821	0.191765	0.0223029	0.0509303
259386_at	At1g13400	Unique		2.42881	0.0031085	0.00129035	0.0229552		5.75651	0.033324	0.00578892	0.0317117		2.52192	0.342616	0.135855	0.232098		2.44855	0.0241957	0.00988164	0.0635272
259411_at	At1g13410	Unique		2.97703	0.00255054	0.000877841	0.0169642		6.40945	0.163785	0.0255537	0.0631418		4.59907	0.157868	0.0343261	0.0863927		5.41716	0.172136	0.031776	0.0765885
259388_at	At1g13420	Tandem Duplicate		2.29291	0.00140619	0.00062323	0.0163545		3.91665	0.327219	0.0835457	0.146051		3.77965	4.55486	1.2051	0.564659		3.20741	0.0358703	0.0111836	0.0590491
259361_at	At1g13440	Duplicate		13.1042	0.0194159	0.0014835	0.0106333		13.8566	0.0185698	0.00134015	0.00983442		12.9407	0.308217	0.0238176	0.0429013		13.5211	0.0490244	0.00362576	0.0163755
259412_at	At1g13450	Duplicate		4.50166	0.0229733	0.00505817	0.0336697		8.28586	0.0172284	0.00207925	0.0158411		7.72994	0.219445	0.028389	0.060602		8.29267	0.0705544	0.00850804	0.0320308
259359_at	At1g13460	Duplicate		5.65435	0.0413817	0.0071297	0.0359767		8.01081	0.131885	0.0164634	0.0453338		6.81648	0.298373	0.0437724	0.0801346		7.90782	0.210868	0.0266657	0.0580695
259385_at	At1g13470	Tandem Duplicate		3.45528	0.0282591	0.00833679	0.0486514		11.3292	0.554481	0.0489426	0.065727		5.54813	4.03917	0.728024	0.362242		5.85996	1.29555	0.221085	0.194237
256103_at	At1g13540	Tandem Duplicate		3.10757	0.00838334	0.00275145	0.0294637		3.34381	0.284429	0.0850615	0.159494		3.9941	0.161012	0.0403124	0.100464		4.59273	0.0294665	0.0064159	0.0373761
256134_at	At1g13560	Duplicate		9.48328	0.0458459	0.00483597	0.0225783		11.6171	0.0132304	0.00113887	0.00990121		9.81525	0.143811	0.0146518	0.0386362		10.8245	0.178001	0.0164442	0.0389764
256133_at	At1g13570	Unique		4.48099	0.0575597	0.0127463	0.0535408		8.29361	0.0143822	0.00173414	0.01446		6.82413	0.628085	0.0920388	0.116135		6.99844	0.121913	0.0174201	0.0498912
256157_at	At1g13580	Unique		3.72316	0.0440001	0.0113775	0.0563397		8.66426	0.0396291	0.00457385	0.0229761		5.68082	0.538772	0.0948405	0.129209		5.81467	0.216159	0.0371748	0.0799579
256158_at	At1g13590	Unique		4.58192	0.0280315	0.00625165	0.0365406		5.08173	0.0485164	0.00954722	0.0433444		5.61921	1.61359	0.287156	0.226059		6.08229	0.0615203	0.0101147	0.0407795
256131_at	At1g13600	Unique		2.86258	0.00129962	0.000460137	0.0125936		6.02008	0.0531462	0.00882816	0.0382943		3.73691	1.4375	0.384676	0.320842		4.00821	0.194136	0.0484346	0.109927
256132_at	At1g13610	Duplicate		2.80443	0.00420183	0.00151909	0.0231139		4.29752	0.109647	0.025514	0.0770513		4.00546	0.379291	0.0946935	0.153757		4.5466	0.122723	0.0269923	0.0770506
256095_at	At1g13630	Unique		2.3481	0.00120833	0.000518986	0.0148039		5.26818	0.0730318	0.0138628	0.0512974		3.0735	0.0708174	0.0230413	0.0865839		3.53789	0.0373254	0.0105502	0.0546082
256071_at	At1g13640	Duplicate		6.4999	0.213438	0.0329829	0.071077		8.26101	0.0851915	0.0103125	0.0353317		6.90837	0.518604	0.075069	0.104242		7.54921	0.403036	0.0533878	0.084095
256096_at	At1g13650	Unique		5.7732	4.75362	0.818793	0.377655		6.92253	0.650833	0.0940167	0.116539		5.69144	5.28073	0.927838	0.403762		9.30698	3.12824	0.336118	0.190038
256097_at	At1g13670	Unique		2.52533	0.00566542	0.00225137	0.0298056		6.16629	0.0944571	0.0153183	0.0498418		3.99312	2.49204	0.624083	0.395335		3.22054	0.167328	0.0519566	0.127015
256102_at	At1g13680	Unique		2.27602	0.000678235	0.000300099	0.0114423		3.22555	0.574233	0.178027	0.234931		2.41036	0.290551	0.120542	0.22363		2.34894	0.00793543	0.0033783	0.0379239
256068_at	At1g13690	Unique		7.37917	0.0263415	0.00357007	0.0219944		9.39414	0.0161514	0.00171931	0.0135285		8.40915	0.296775	0.0352919	0.064783		9.37644	0.0856925	0.00913913	0.03122
256098_at	At1g13700	Unique		3.84272	0.282528	0.0767823	0.138322		7.22703	0.319097	0.0441533	0.0781631		7.02846	1.12512	0.160081	0.150917		6.90188	1.0202	0.147815	0.146344
256099_at	At1g13710	Duplicate		6.97532	0.0875443	0.0124925	0.0424179		7.49147	0.0268326	0.00358176	0.0218658		5.95009	3.90829	0.656847	0.332254		6.10965	0.0918151	0.0150279	0.0495953
256070_at	At1g13730	Unique		8.63818	0.0348118	0.00405054	0.0215994		8.87957	0.0382833	0.00431139	0.022035		7.79207	1.28704	0.165173	0.145594		8.46562	0.261611	0.0309028	0.0604184
256069_at	At1g13740	Unique		6.66869	0.0205471	0.00312421	0.0214949		8.23144	0.0430929	0.00523516	0.025219		7.49537	1.31035	0.174821	0.152722		7.45752	0.810139	0.108634	0.120694
256100_at	At1g13750	Duplicate		2.47283	0.155651	0.0596124	0.159545		10.0937	0.189592	0.0187831	0.0431378		6.38593	2.57497	0.403225	0.251282		6.54595	1.08641	0.165966	0.159229
256101_at	At1g13760	Unique		2.16398	0.000366333	0.000170213	0.00884474		3.23232	0.303822	0.0939953	0.170528		2.26667	0.0284528	0.0125527	0.0744174		2.15376	0.00633419	0.00294099	0.0369529
259448_at	At1g13790	Unique		3.11668	0.0532531	0.0167117	0.0740423		5.08684	1.51291	0.297416	0.241801		4.37592	1.51663	0.346586	0.28143		4.68565	0.297531	0.0634984	0.116412
259449_at	At1g13800	Unique		3.11043	0.00100183	0.00032467	0.010176		4.82018	0.126882	0.026323	0.0738986		3.83011	0.102641	0.0267985	0.0836469		4.04636	0.0173334	0.0042837	0.032537
259422_at	At1g13810	Unique		4.4033	0.051868	0.0118481	0.0517215		7.95437	0.00557298	0.000700619	0.00938508		5.39501	0.358403	0.0664322	0.110967		6.86831	0.158338	0.0230533	0.0579351
259424_at	At1g13830	Unique		1.96713	0.000345171	0.000176315	0.00944462		7.06394	0.0653978	0.00925797	0.0362021		3.24844	2.7047	0.832615	0.506273		2.87101	0.0833566	0.0290339	0.100562
259450_at	At1g13870	Unique		5.92752	0.0196592	0.00330337	0.0236543		8.74427	0.0062437	0.000714034	0.00903645		6.52448	0.0937975	0.0143762	0.0469407		7.04611	0.112045	0.0159017	0.0475059
259423_at	At1g13880	Duplicate		6.09487	0.02204	0.00359027	0.0243579		8.59177	0.0159612	0.00185773	0.0147045		7.6506	0.286108	0.0373968	0.0699148		8.1954	0.11207	0.0136748	0.0408484
259451_at	At1g13890	Duplicate		2.90835	0.00392844	0.00136806	0.0215508		2.13617	0.107624	0.0503819	0.153575		3.72742	2.7398	0.73504	0.44407		3.55846	0.0469649	0.0131981	0.060901
259420_at	At1g13900	Duplicate		7.21283	0.0960391	0.0134058	0.0429654		9.36386	0.0366452	0.00391347	0.0204434		8.24006	0.425257	0.0516085	0.0791399		8.70847	0.0615913	0.00707257	0.0284982
259421_at	At1g13910	Duplicate		3.30045	0.00548199	0.00165869	0.0224335		7.43178	0.0152697	0.00205465	0.0166273		5.37604	0.354752	0.0659877	0.11079		6.40609	0.0713745	0.0111417	0.0417041
262662_at	At1g13920	Unique		2.88391	0.0397469	0.0137307	0.0691305		6.25864	0.0427677	0.00683338	0.0330429		5.0527	0.294903	0.0583655	0.107477		5.77353	0.152206	0.0263627	0.0675731
262609_at	At1g13930	Duplicate		10.9282	0.237161	0.0211044	0.0445631		14.3534	0.016382	0.00114133	0.00891719		11.5395	3.01521	0.261295	0.150477		12.8864	1.07056	0.0830771	0.0802925
262663_at	At1g13940	Unique		4.97409	0.00947518	0.00187192	0.0195695		7.7906	0.0266106	0.00341573	0.020939		6.63962	0.0709355	0.0106837	0.0401133		7.09465	0.0735451	0.0103663	0.0382249
262615_at	At1g13950	Duplicate		4.0805	0.675079	0.160484	0.201356		7.79003	0.424971	0.0545532	0.0836837		6.73674	2.52431	0.374708	0.235842		6.90566	0.247171	0.0357926	0.0719936
262613_at	At1g13960	Duplicate		4.73422	0.0216358	0.0045983	0.0310697		7.92356	0.0325136	0.00410341	0.0227569		7.06878	0.59601	0.0843158	0.109215		7.9575	0.134511	0.0169036	0.0460894
262664_at	At1g13970	Unique		2.62193	0.00139586	0.000538126	0.0142495		5.83959	0.0561129	0.00960905	0.0405648		4.85491	5.9651	1.22867	0.503069		2.9657	0.103725	0.0349747	0.108596
262614_at	At1g13980	Duplicate		6.74257	0.257483	0.0369774	0.0752574		8.71027	0.307012	0.0352472	0.0636131		8.80009	0.216944	0.0246524	0.0529281		9.33979	0.0879624	0.00941803	0.031755
262607_at	At1g13990	Unique		2.36906	0.0761495	0.0301534	0.116482		11.0177	0.0311933	0.0028312	0.0160302		7.58232	3.39264	0.447441	0.242922		8.14771	2.42172	0.297227	0.190997
262660_at	At1g14000	Unique		8.34447	0.0139735	0.00168706	0.0141662		10.7515	0.0231048	0.00214899	0.0141378		9.28281	0.199589	0.0215009	0.048127		9.79366	0.0546395	0.00557907	0.0238676
262647_at	At1g14020	Duplicate		5.19763	0.0171844	0.0032477	0.025221		8.22853	0.0131673	0.0016002	0.0139452		6.92194	0.350471	0.050632	0.0855261		7.00783	0.0562781	0.00803075	0.0338522
262648_at	At1g14030	Unique		8.85834	0.0374677	0.00423982	0.0218512		9.62129	0.109142	0.0113438	0.034337		7.7112	2.96848	0.384957	0.223432		9.28898	0.216275	0.023283	0.0500651
262649_at	At1g14040	Duplicate		4.22945	0.0614309	0.0147484	0.0586016		6.81867	0.16481	0.0241703	0.0595376		6.39938	1.61428	0.252256	0.198542		6.30455	0.218075	0.0345901	0.0740711
262611_at	At1g14050			6.22728	0.0168574	0.00272011	0.0208496		8.52219	0.0220582	0.00258832	0.0174274		6.62817	0.432131	0.0651961	0.0991777		6.07508	0.322882	0.0531486	0.0935341
262665_at	At1g14070	Tandem Duplicate		2.1639	0.000668716	0.000310975	0.0119504		6.47422	0.710504	0.109744	0.130195		3.19867	0.968521	0.302788	0.30767		3.69044	0.241725	0.0655004	0.133224
262666_at	At1g14080	Tandem Duplicate		2.19233	0.00195597	0.000898599	0.0201732		4.86229	0.415651	0.0854847	0.132594		3.16055	2.952	0.934016	0.543621		2.79789	0.0545731	0.0195051	0.0834946
262650_at	At1g14090			2.86221	0.00139692	0.000491532	0.0130582		5.07236	0.351871	0.0693702	0.116945		3.99071	0.14075	0.0352695	0.0940101		4.6202	0.140681	0.030449	0.0811813
262651_at	At1g14100			2.68883	2.0433	0.683633	0.531622		5.9297	0.276785	0.0466778	0.0887235		2.20026	0.530316	0.241024	0.330974		2.17624	0.0153332	0.00704574	0.0568996
262652_at	At1g14110	Unique		2.18183	0.000430326	0.000198295	0.00950775		3.74135	0.204799	0.0547392	0.120958		2.09403	0.0430781	0.0205718	0.0991162		2.14248	0.00667092	0.00311364	0.038122
262608_at	At1g14120	Tandem Duplicate		5.797	1.40268	0.214733	0.204304		5.23797	0.138279	0.0263994	0.070993		4.65352	6.21104	1.3347	0.535551		5.79059	1.28079	0.221185	0.195442
262653_at	At1g14130	Tandem Duplicate		3.26045	0.0463683	0.014203	0.066044		7.96802	0.0103017	0.00129288	0.0127381		7.10536	1.67237	0.235367	0.182003		6.37244	0.297521	0.0466887	0.0855959
262610_at	At1g14140	Unique		6.70145	0.0401933	0.00597929	0.0299163		8.72317	0.00624495	0.000715904	0.00905921		7.16427	0.353299	0.049314	0.0829658		7.9231	0.101049	0.0127538	0.040121
262612_at	At1g14150	Unique		11.186	0.042314	0.00377467	0.0183893		12.0017	0.0430096	0.00358362	0.0172798		7.78152	10.2193	1.31328	0.410815		11.3734	0.32938	0.0289607	0.0504615
262654_at	At1g14180	Unique		3.76613	0.00613769	0.00162826	0.0208021		6.93081	0.155314	0.0224093	0.056862		5.97764	1.07214	0.179358	0.173219		6.23783	0.106264	0.0170353	0.0522587
262655_s_at	At1g14190	Tandem Duplicate		3.65515	0.0307442	0.00853398	0.0479708		4.99733	0.0854125	0.0170916	0.0584821		5.00566	1.14788	0.229316	0.214036		5.04336	0.148093	0.029364	0.076304
262656_at	At1g14200	Unique		3.96001	0.232079	0.0592287	0.121652		9.65249	0.0820922	0.00850477	0.0296833		7.04288	2.77159	0.393531	0.236382		6.92526	1.62945	0.235291	0.184325
262657_at	At1g14210	Unique		5.88494	0.181889	0.0310874	0.0724704		8.79749	0.0209477	0.0023811	0.0164516		6.82692	1.75458	0.257009	0.194027		6.9873	0.251917	0.0360536	0.0718323
262658_at	At1g14220	Duplicate		2.1544	0.000353029	0.000167146	0.00872126		4.66203	0.13643	0.0292641	0.0792282		2.82384	3.14695	1.11442	0.62821		3.05346	0.0239582	0.00784623	0.0506914
262659_at	At1g14240	Tandem Duplicate		3.08161	0.0526293	0.0171716	0.0744452		6.38541	0.0666654	0.0104403	0.0404354		4.69071	2.39975	0.511597	0.330252		4.22534	0.332245	0.0786316	0.136417
262661_s_at	At1g14250	Tandem Duplicate		4.42747	0.983827	0.229337	0.224029		9.56829	1.39492	0.145786	0.123436		6.85101	1.02755	0.149985	0.147961		8.14671	1.53203	0.188055	0.151933
261481_at	At1g14260	Unique		2.58275	0.0102824	0.00408986	0.0392613		7.31079	0.112576	0.0153986	0.0458943		5.34251	0.987753	0.184886	0.186028		4.45394	0.0833801	0.0187205	0.0648316
261483_at	At1g14270	Unique		8.83645	0.0350525	0.00398657	0.0211876		10.5378	0.0203056	0.00192693	0.0135225		8.0761	2.41699	0.299276	0.192502		10.1536	0.108809	0.0107163	0.0324872
261480_at	At1g14280	Duplicate		7.48607	0.155174	0.0210216	0.0526206		8.66057	0.0300281	0.00346721	0.0200086		7.61077	5.16037	0.678035	0.298478		9.90453	1.24738	0.12594	0.112763
261492_at	At1g14290	Duplicate		7.43823	0.074899	0.0104114	0.0367933		9.75538	0.0751921	0.00770776	0.0281088		7.99075	2.06961	0.259	0.180035		7.92897	0.556529	0.0701893	0.0940865
261524_at	At1g14300	Unique		6.56919	0.0524559	0.00800378	0.0348647		9.26398	0.0235358	0.00254057	0.0165602		7.64975	0.443894	0.0580273	0.0870949		7.86295	0.13156	0.0167317	0.0461293
261477_at	At1g14310	Unique		5.80641	0.100722	0.0167992	0.054658		8.85669	0.0825148	0.00931667	0.0324336		7.7279	0.248263	0.0321255	0.0644754		8.92337	0.0728762	0.00816689	0.0302527
261490_at	At1g14320			13.354	0.00617863	0.000464454	0.00588619		13.7631	0.0128151	0.000931119	0.00822515		13.1265	0.289807	0.022078	0.0410114		13.3608	0.137591	0.0102981	0.0277627
261525_at	At1g14330	Duplicate		6.00487	0.0134679	0.00224836	0.0193262		8.71325	0.071955	0.00825811	0.0307858		7.63252	0.4544	0.0595348	0.0883184		7.89	0.171748	0.0217677	0.0525253
261487_at	At1g14340	Unique		4.52725	0.136948	0.0292039	0.0817416		8.53957	0.0424333	0.00496902	0.0241222		6.1947	1.03461	0.167015	0.164198		6.66729	0.269574	0.0404323	0.0778734
261488_at	At1g14345	Unique		11.0498	0.0604826	0.00551074	0.0222568		10.9467	0.0454473	0.0041517	0.0194748		7.80598	5.90994	0.757104	0.311433		10.3	0.447936	0.043489	0.0649788
261491_at	At1g14350	Unique		5.84752	0.0887187	0.0151596	0.0509373		7.34694	0.150483	0.0204824	0.0528004		5.67524	1.37248	0.241837	0.206428		6.58768	0.37117	0.0563431	0.0924813
261485_at	At1g14360	Duplicate		6.3225	0.387341	0.0621941	0.0984368		11.0677	0.284362	0.0256929	0.0481811		8.19487	0.313584	0.0382659	0.0683337		8.00509	0.702917	0.0878087	0.104734
261526_at	At1g14370	Duplicate		2.03792	0.00473394	0.00241524	0.0337617		8.94967	0.0501721	0.00560603	0.0250279		6.18689	3.61108	0.583666	0.307147		6.68493	1.16882	0.174845	0.161725
261479_at	At1g14380	Duplicate		5.18072	0.0344994	0.0066419	0.0358522		7.99343	0.119803	0.0149877	0.0433013		7.21207	0.719822	0.0998079	0.117639		7.04638	0.233241	0.0331009	0.0685388
261527_at	At1g14390	Duplicate		2.61495	0.00114348	0.000440614	0.0129315		4.81893	0.0455248	0.00944709	0.0442765		3.11122	0.353753	0.113702	0.19117		4.27614	0.0762355	0.0178281	0.0645694
261484_at	At1g14400	Duplicate		10.3299	0.0161395	0.00155518	0.0122984		12.4655	0.0445931	0.00357733	0.0169405		11.6821	0.15944	0.0136482	0.0341803		11.5663	0.081368	0.00703495	0.0246623
261493_at	At1g14410	Duplicate		8.37103	0.0370697	0.00442072	0.0230001		10.1388	0.00516443	0.000509374	0.00708804		7.79795	1.21349	0.155617	0.141266		8.93563	0.14357	0.0160671	0.042404
261528_at	At1g14420	Duplicate		2.3912	0.00101885	0.000430461	0.0133487		3.31863	0.0752994	0.0226899	0.0826869		3.93439	7.2603	1.84534	0.684858		2.89926	0.0462838	0.015964	0.0742039
261529_at	At1g14430	Unique		2.61582	0.000715468	0.00027578	0.0102256		3.72043	0.0718424	0.0193102	0.0720439		3.19522	0.11428	0.035766	0.1058		3.35804	0.0297464	0.00885828	0.0513608
261502_at	At1g14440	Unique		5.99968	0.117809	0.0183494	0.0572086		8.02086	0.0438624	0.00546854	0.0261111		5.86088	4.11043	0.701334	0.345924		6.41907	0.350301	0.0545719	0.0922037
261489_at	At1g14450	Duplicate		8.49193	0.0139237	0.00164847	0.0138954		11.3221	0.0305595	0.0026991	0.01544		9.50066	0.128749	0.0135515	0.0377674		9.21973	0.0483957	0.00524914	0.0238608
261471_at	At1g14460	Duplicate		5.35089	0.0650437	0.0117789	0.0476625		7.48167	0.0270477	0.00361519	0.0219819		6.47151	0.727738	0.112453	0.13182		7.49446	0.12351	0.0164801	0.0468932
261472_at	At1g14470	Unique		2.42467	0.000830462	0.000344798	0.0118852		4.7247	0.0751933	0.015915	0.0580384		2.40499	0.0741034	0.0308123	0.113189		2.8748	0.0156484	0.0054433	0.0435138
261476_at	At1g14480	Duplicate		2.18971	0.00404098	0.00185184	0.0290307		6.46899	0.0657722	0.0101673	0.0396447		5.78009	1.21021	0.209376	0.190325		5.56562	1.27397	0.2289	0.202799
261473_at	At1g14490	Unique		2.19894	0.000522653	0.000239047	0.0103966		3.69621	0.170548	0.0461413	0.111729		3.89251	1.09456	0.281197	0.268776		3.6252	0.0852947	0.0235283	0.0805617
261486_at	At1g14510	Duplicate		8.85109	0.0193551	0.00219911	0.0157181		10.722	0.0132466	0.00123546	0.0107344		9.6542	0.20938	0.021688	0.047397		9.6039	0.0552741	0.00575537	0.0244801
261478_at	At1g14520	Duplicate		1.87058	0.000447702	0.000240088	0.0113115		5.97294	0.0173584	0.00290617	0.022058		2.74986	0.100302	0.0364753	0.115171		2.37918	0.0568458	0.023893	0.100213
261482_at	At1g14530	Duplicate		2.52573	0.0332618	0.0130247	0.0722081		7.23665	0.0189323	0.00261617	0.0190136		6.93647	1.40403	0.202413	0.170824		6.64264	0.486825	0.073288	0.105038
261474_at	At1g14540	Tandem Duplicate		2.38623	0.000599314	0.000251745	0.0102592		6.19554	0.138506	0.0223558	0.0600697		3.13662	1.43292	0.456834	0.381635		3.41277	0.454045	0.133043	0.197443
261475_at	At1g14550	Tandem Duplicate		2.03178	0.000488779	0.000242477	0.0108813		4.59209	0.0945996	0.0206005	0.0669783		2.61167	0.30864	0.118177	0.21272		2.69519	0.0545817	0.0202515	0.0866831
260777_at	At1g14560	Duplicate		5.03641	0.0133574	0.00261153	0.0229478		8.04017	0.109258	0.013589	0.0411113		7.01644	0.45163	0.0643674	0.0957799		7.5909	0.0314085	0.00413765	0.023347
260782_at	At1g14570	Unique		8.0527	0.0427673	0.00524135	0.0256811		10.3583	0.0113064	0.00109153	0.0102653		9.39021	0.179371	0.0191019	0.0451025		9.52069	0.0275554	0.00289427	0.0174355
260776_at	At1g14580	Duplicate		5.15591	0.0600363	0.0119103	0.0475228		8.99023	0.0313214	0.00348394	0.0196857		5.57017	2.18082	0.391518	0.26512		7.3497	0.45775	0.0622814	0.0920544
260780_at	At1g14610	Unique		9.38811	0.0184796	0.00195929	0.01448		10.0453	0.113454	0.0112943	0.0335312		9.79338	0.234186	0.0239127	0.0494138		10.6416	0.0640886	0.00602245	0.0237894
260781_at	At1g14620	Unique		7.59229	0.0359715	0.00471849	0.0249808		9.66722	0.00843178	0.000872203	0.00949857		7.64854	1.36415	0.178355	0.152705		7.81714	0.174905	0.0223746	0.0535
260778_at	At1g14640	Tandem Duplicate		2.40681	0.00491762	0.00203431	0.0291363		6.11404	0.029212	0.00477786	0.0279546		3.24523	0.3963	0.122118	0.193984		4.3907	0.0426216	0.00970722	0.0470198
260779_at	At1g14650	Tandem Duplicate		5.05899	0.0192713	0.00381717	0.0274405		7.39696	0.043068	0.00582239	0.0280559		7.48491	0.130049	0.0173748	0.0481801		8.39733	0.0775423	0.00923416	0.033161
262835_at	At1g14660	Unique		2.70131	0.00158378	0.000590616	0.0147324		6.24852	0.168985	0.027044	0.065788		4.86837	0.257009	0.0527916	0.104133		4.8274	0.0951634	0.0197132	0.0639031
262846_at	At1g14670	Duplicate		9.10681	0.00967043	0.001064	0.0107983		11.6866	0.0100606	0.00086087	0.00858272		9.74699	0.346318	0.0355308	0.0603764		10.1314	0.0959042	0.00946606	0.0305668
262836_at	At1g14680	Unique		3.16195	0.0047532	0.00152058	0.0218041		4.88386	0.127732	0.0261539	0.0731791		4.29826	0.236851	0.0551039	0.113226		5.17875	0.263347	0.0508514	0.0990921
262848_at	At1g14685	Duplicate		5.72655	0.125524	0.0221993	0.0618686		8.91458	0.0573392	0.00643207	0.0268612		7.57521	0.270395	0.0356947	0.0686443		8.54014	0.179332	0.0209987	0.0495866
262843_at	At1g14687	Unique		2.7185	0.000662399	0.000246339	0.00946739		3.84595	0.0630878	0.0164037	0.0653085		4.70412	0.849701	0.180629	0.195954		3.21812	0.121002	0.0376002	0.108092
262834_at	At1g14690	Unique		2.52948	0.000463959	0.000184259	0.00851548		6.54496	0.0181444	0.00277227	0.0205809		4.0159	0.0356445	0.00887584	0.0470125		4.13535	0.00789542	0.00190925	0.021487
262830_at	At1g14700	Unique		9.39171	0.308461	0.0327683	0.0591365		8.01997	1.04155	0.129869	0.127253		6.23409	5.01387	0.804267	0.359181		9.23129	0.407626	0.0441569	0.0691621
262849_at	At1g14710	Unique		7.65491	0.049331	0.00638534	0.0290148		9.13975	0.0381515	0.00417423	0.0213708		7.96857	0.785921	0.0986277	0.111252		9.15376	0.0790926	0.00864045	0.0307233
262842_at	At1g14720	Duplicate		8.7255	0.0192089	0.00221933	0.015884		10.5076	0.0440373	0.00419098	0.0199712		8.33594	1.35882	0.163008	0.139839		9.76297	0.490632	0.0502544	0.0717458
262831_at	At1g14730	Unique		2.07587	0.0451499	0.0218642	0.10236		6.99915	0.0163325	0.0023335	0.0182592		4.70823	4.33905	0.921589	0.442425		4.27927	1.45071	0.339009	0.281463
262845_at	At1g14740	Unique		4.93458	0.0266716	0.0055593	0.0330959		8.60695	0.0189566	0.00220247	0.0159967		7.31152	0.377952	0.0516927	0.0840835		7.42066	0.213687	0.0287962	0.062294
262833_at	At1g14750	Unique		2.24158	0.000322496	0.000144607	0.0080114		5.49018	0.0210164	0.003828	0.0264054		2.34165	0.0784145	0.0334868	0.119585		2.2127	0.00517892	0.00234055	0.0325236
262886_at	At1g14760	Unique		2.80291	0.00326545	0.0011658	0.0203874		6.75669	0.10385	0.0153699	0.0476946		4.20956	0.795522	0.18898	0.21188		4.26149	0.0860398	0.0201901	0.0688316
262839_at	At1g14770	Unique		4.66522	0.0491836	0.0107944	0.0475377		5.84925	0.33549	0.0573561	0.0990238		5.45103	0.342488	0.06283	0.10736		6.24498	0.100659	0.0161184	0.0508038
262887_at	At1g14780	Unique		1.96083	0.00116508	0.000596822	0.0174076		7.2043	0.088956	0.0123476	0.0413996		4.47999	2.09689	0.468057	0.32323		4.90084	0.653825	0.133411	0.164991
262888_at	At1g14790	Unique		2.62333	0.00274558	0.00107351	0.019974		8.16552	0.0245924	0.00301173	0.0192051		6.24151	1.25374	0.200871	0.179396		6.98473	0.302593	0.043322	0.0787553
262889_at	At1g14800	Unique		2.99255	0.00333781	0.00112925	0.0193059		4.51775	0.0551975	0.0122179	0.0520041		3.66208	0.094502	0.0258055	0.0839445		3.83012	0.0231819	0.00605254	0.0397523
262841_at	At1g14810	Unique		11.1641	0.0144186	0.00129604	0.0107557		11.638	0.00650621	0.000559047	0.00693081		9.59856	1.30917	0.136392	0.119204		11.0511	0.322226	0.0291579	0.051366
257463_at	At1g14820	Unique		7.19419	0.0293801	0.00401812	0.0238257		9.32763	0.013974	0.00149813	0.0126733		7.62966	1.28544	0.16848	0.148601		7.34836	0.271404	0.0369339	0.0708953
262837_at	At1g14830	Duplicate		7.09449	0.0188741	0.00262819	0.0193647		9.53452	0.0362465	0.0038016	0.019968		8.21237	0.465409	0.0566717	0.0830709		9.11116	0.0535851	0.00588126	0.0254067
262847_at	At1g14840	Duplicate		6.95869	0.0327515	0.00463993	0.0260069		7.43434	0.231637	0.0311578	0.0647384		6.53033	1.73715	0.266013	0.201829		8.47239	0.297001	0.0350551	0.064324
262890_at	At1g14850	Unique		6.61122	0.0177995	0.00270013	0.02018		8.8744	0.0256955	0.00289546	0.018063		7.31343	0.464351	0.0634929	0.0931756		7.31724	0.058997	0.00806274	0.0331946
262832_s_at	At1g14870	Tandem Duplicate		4.23427	0.375648	0.103091	0.144748		13.9107	0.0668415	0.00480503	0.0185855		8.99856	9.85058	1.09468	0.348785		7.67201	3.84274	0.500879	0.255512
262844_at	At1g14890	Unique		4.68326	0.683291	0.133862	0.176504		10.0114	0.156842	0.0156664	0.0395583		7.20591	2.92603	0.406059	0.237383		8.4829	0.302036	0.0356052	0.0647865
262840_at	At1g14900	Unique		7.51274	0.167389	0.0216627	0.0544584		8.12415	0.041637	0.00512509	0.0251167		7.61433	3.41837	0.448939	0.242816		7.7049	0.32448	0.0421134	0.073931
262856_at	At1g14910	Unique		5.81633	0.0542499	0.00912624	0.0400452		8.82447	0.0236465	0.00267965	0.0174259		7.58242	0.11895	0.0156877	0.0454857		8.40102	0.0670506	0.00798125	0.0308226
262850_at	At1g14920	Duplicate		7.35512	0.223051	0.0295837	0.0642114		10.408	0.0768757	0.0073862	0.0266395		8.74327	0.622481	0.0711955	0.090238		9.56956	0.502082	0.0524666	0.0740449
262857_at	At1g14930	Tandem Duplicate		3.18886	0.00311928	0.000989517	0.0175142		3.99536	2.89921	0.725644	0.426171		4.30223	4.18153	0.971944	0.475306		4.43196	0.0520199	0.0117374	0.0514622
262858_at	At1g14940	Tandem Duplicate		3.14101	0.00383825	0.00123367	0.0197241		3.11194	0.209003	0.0671617	0.146908		3.80764	4.14891	1.08963	0.534948		3.67272	0.0358292	0.00975551	0.0515384
262828_at	At1g14950	Tandem Duplicate		3.01195	0.77638	0.242199	0.292543		6.14607	0.0247114	0.00402068	0.0255771		5.90692	6.31642	1.06933	0.425475		5.48358	0.0311551	0.00568152	0.0321884
262838_at	At1g14960	Tandem Duplicate		2.90329	0.0183903	0.0065559	0.0467093		5.74605	0.0386138	0.00672005	0.0341981		3.73278	4.93486	1.32203	0.595121		3.6869	0.0403371	0.0109406	0.0544742
262829_at	At1g14970	Duplicate		2.37895	0.00877155	0.00366154	0.0393688		5.8694	0.306149	0.0521602	0.0942699		4.89723	1.19472	0.243959	0.223194		4.93829	0.15088	0.0305531	0.0786574
260714_at	At1g14980	Duplicate		11.4262	0.0374016	0.00325831	0.0169256		12.6016	0.0322751	0.00256119	0.0142563		10.9714	0.741305	0.0675671	0.078476		11.5192	0.38959	0.0338209	0.0541853
260738_at	At1g14990	Unique		5.79459	0.0603059	0.00997972	0.0423797		8.99347	0.0198982	0.00221251	0.0156848		7.16342	0.0965979	0.0134849	0.0433873		7.15108	0.126874	0.0177419	0.0498098
260739_at	At1g15000	Unique		6.79319	0.0678847	0.00956166	0.0383541		8.59907	0.135868	0.0158003	0.0428654		6.79361	1.37972	0.20309	0.1729		7.20808	0.353027	0.0489765	0.0824298
260744_at	At1g15010	Duplicate		1.66615	0.00019232	0.000115707	0.00832335		8.10065	0.288878	0.0356611	0.0663495		6.07307	5.02885	0.828058	0.369255		4.27062	5.13841	1.2032	0.530791
260740_at	At1g15020	Duplicate		2.55976	0.00182256	0.000718135	0.0166779		7.82801	0.0543579	0.00694402	0.0297838		5.42526	0.311541	0.0574241	0.102881		6.07772	0.201459	0.0331471	0.0738504
260743_at	At1g15040	Duplicate		2.34314	0.000828038	0.000356389	0.0122808		4.18486	0.0960996	0.0229637	0.0740765		3.48684	0.189893	0.05446	0.124975		3.50761	0.0319013	0.00909488	0.0509205
260741_at	At1g15045			1.7533	0.000255855	0.000146229	0.00912309		3.24185	0.0433545	0.0133734	0.064228		4.2326	5.34508	1.26283	0.546223		3.3977	1.36343	0.401281	0.343662
260742_at	At1g15050	Unique		3.05099	0.00315243	0.00104397	0.0184027		5.46431	0.236245	0.0432341	0.08895		4.25372	0.576053	0.135423	0.178427		3.40508	0.0434672	0.0127654	0.0612285
262604_at	At1g15060	Unique		6.22434	0.135692	0.0220174	0.0591813		9.03492	0.0216434	0.00239552	0.0162831		7.43728	0.270687	0.036396	0.0699552		8.2902	0.119278	0.0143879	0.0416597
262596_at	At1g15080	Duplicate		2.84616	0.016358	0.00573009	0.0449371		6.68747	0.0607879	0.00908982	0.0368678		4.87847	0.595025	0.12197	0.158119		5.55071	0.154693	0.0278691	0.0708577
262590_at	At1g15100	Unique		6.24657	0.134618	0.021015	0.0587366		8.69946	0.0169931	0.00195335	0.0149845		7.00642	2.37826	0.33944	0.220107		6.99691	1.46969	0.210049	0.173263
262583_at	At1g15110	Unique		5.73256	0.0353145	0.0061644	0.0327815		7.77114	0.0122286	0.00157359	0.0142299		7.12242	1.3486	0.189345	0.163047		6.53186	0.355355	0.0544033	0.0912629
262593_at	At1g15120	Unique		10.5664	0.0142149	0.00134387	0.0112835		11.6395	0.0926782	0.00796239	0.026155		11.0995	0.348954	0.0314387	0.0532207		11.1611	0.0596466	0.00534413	0.0218819
262588_at	At1g15130	Unique		6.49304	0.038155	0.00580952	0.0300834		9.82115	0.00591327	0.000602095	0.00782981		8.3781	0.253427	0.0302487	0.060087		8.48948	0.0768624	0.00905384	0.032657
262572_at	At1g15140	Unique		11.1168	0.0119258	0.00107179	0.00982344		11.2037	0.00843183	0.000752591	0.00819593		9.29931	1.19745	0.128768	0.117673		9.83462	0.18023	0.018326	0.0431673
262589_s_at	At1g15150	Tandem Duplicate		3.36292	0.005374	0.0016079	0.0217988		5.21923	0.131541	0.0252031	0.0694903		5.16923	2.31547	0.447933	0.29437		5.30384	0.0888106	0.0167446	0.0561878
262605_at	At1g15170	Tandem Duplicate		4.88642	0.0784279	0.0157959	0.0573118		7.45381	0.0515744	0.0069192	0.0304676		6.26011	0.680347	0.10868	0.13176		7.11606	0.153667	0.0215944	0.0550872
262569_at	At1g15180	Tandem Duplicate		7.94254	0.403695	0.051997	0.0799958		8.53045	0.0476888	0.00559041	0.0255998		6.75443	3.94373	0.583872	0.294012		9.38007	0.21091	0.022485	0.0489602
262606_at	At1g15190	Unique		1.82359	0.00029518	0.000162426	0.00942141		3.68575	0.0406035	0.0110163	0.0546708		2.13608	0.391868	0.183452	0.293057		1.90952	0.0244272	0.0127923	0.0818487
262570_at	At1g15200	Unique		8.0982	0.0783144	0.00972612	0.0345567		7.69164	0.136258	0.017715	0.0479912		8.89032	0.24638	0.0277133	0.0558323		10.2756	0.0482303	0.00469368	0.0213724
262575_at	At1g15210	Duplicate		2.14925	0.000397318	0.000195401	0.00927433		6.29361	0.018269	0.00290278	0.0214762		4.12946	4.4672	1.08179	0.511828		3.2402	0.380414	0.117405	0.190352
262591_at	At1g15220	Unique		4.08462	0.0190235	0.00460783	0.0337671		7.10298	0.0380259	0.0053535	0.0274536		5.35619	0.0943808	0.0176209	0.0573569		5.64192	0.104402	0.0185046	0.0572699
262574_at	At1g15230	Unique		6.32345	0.00299264	0.00046965	0.00865113		8.58863	0.00412303	0.000480057	0.00747626		7.96663	0.445331	0.0558996	0.0837658		7.91944	0.206112	0.0260261	0.0573267
262594_at	At1g15250			8.98999	0.0303579	0.00343154	0.019381		9.19909	0.196294	0.0213384	0.0481624		8.25124	0.729334	0.0883909	0.103501		8.45689	0.27737	0.0327981	0.0622757
262598_at	At1g15260	Unique		9.13951	0.120103	0.0131577	0.0379188		9.80941	0.178527	0.0181996	0.0430734		7.58199	5.37035	0.708303	0.305646		9.61598	0.41936	0.0436108	0.0673442
262602_at	At1g15270	Unique		10.0839	0.0241962	0.00235395	0.0154256		10.7383	0.0778976	0.00725418	0.0259912		10.8004	0.214253	0.0198375	0.0428571		11.1848	0.0467519	0.00417995	0.0193318
262576_at	At1g15280	Duplicate		6.26732	0.0506966	0.00822538	0.0359259		8.5779	0.0268944	0.00313531	0.0191183		7.02405	0.095562	0.013605	0.0440103		7.76742	0.0462654	0.00595634	0.0276918
262577_at	At1g15290	Unique		8.37481	0.0316179	0.0037929	0.021232		8.79256	0.080683	0.00917627	0.0323054		7.87142	1.82207	0.231479	0.171486		10.2068	0.528767	0.0518053	0.0712429
262578_at	At1g15300			2.32702	0.000267248	0.000115973	0.00702518		5.33505	0.0325789	0.00610657	0.0338321		3.99509	0.762836	0.190943	0.218619		4.13457	0.156948	0.03796	0.0958181
262601_at	At1g15310	Duplicate		4.72389	0.0302762	0.00646624	0.0368342		7.25412	0.250861	0.0345818	0.0690449		6.93097	0.701456	0.101206	0.120839		6.9335	0.214533	0.0309415	0.0668028
262579_at	At1g15320	Unique		2.3481	0.000914991	0.000391726	0.0128823		5.05011	0.0951566	0.0188425	0.0610828		3.35665	0.150742	0.0449085	0.115667		3.01951	0.0145977	0.00483445	0.0400134
262580_at	At1g15330	Unique		2.55671	0.00785364	0.0030992	0.0346621		6.91299	0.0183433	0.00265345	0.0195917		4.92498	2.6495	0.537971	0.330504		5.18757	0.0220427	0.00424914	0.0286199
262600_at	At1g15340	Unique		8.15235	0.042088	0.00512522	0.025165		8.95612	0.111407	0.0124392	0.037268		9.74798	0.900373	0.0923651	0.0973412		10.9565	0.090195	0.00823209	0.0274106
262599_at	At1g15350	Unique		4.77636	0.0226398	0.00482176	0.0315021		9.07105	0.0328947	0.00362634	0.0199943		7.35723	1.62088	0.220311	0.173046		7.65936	0.214295	0.0279781	0.0604384
262595_at	At1g15360	Duplicate		2.24772	0.00752627	0.00334951	0.0385965		4.3861	0.0947134	0.021594	0.0701661		3.7984	2.28018	0.600302	0.397544		4.2102	0.0412122	0.00978866	0.0482181
262581_at	At1g15370	Unique		8.34304	0.0240799	0.00293343	0.0185996		11.1348	0.0404785	0.00363532	0.0180689		9.32107	0.118518	0.0127151	0.0369341		9.54013	0.0599309	0.00628198	0.0256608
262603_at	At1g15380	Duplicate		2.18459	0.00429935	0.00206289	0.0300146		7.34415	0.365102	0.0497133	0.0822745		6.23208	8.74325	1.40294	0.474464		5.84834	1.67789	0.2869	0.221487
262573_at	At1g15390	Unique		9.31923	0.0128749	0.00136067	0.0121757		9.65983	0.0424899	0.00439861	0.021339		7.8785	0.81428	0.103355	0.114536		9.13181	0.171353	0.0187644	0.0453304
262592_at	At1g15400	Duplicate		8.30581	0.0196223	0.00237093	0.0168653		10.605	0.0261332	0.00246424	0.0152436		9.48184	0.912049	0.096189	0.10072		9.78103	0.193551	0.0197884	0.0449794
262582_at	At1g15410	Unique		5.65701	0.267332	0.0462903	0.0913983		8.1568	0.0287605	0.00352596	0.0207911		6.93336	0.831308	0.1199	0.131504		8.39747	0.506946	0.0603689	0.0847876
262544_at	At1g15425			7.53606	0.0549292	0.00733165	0.0310998		9.71287	0.0228857	0.00235623	0.0155752		7.74146	0.638349	0.0824585	0.103206		7.65494	0.310152	0.0405166	0.0727521
262571_at	At1g15430	Duplicate		5.89339	0.0614565	0.0104186	0.0420648		8.92016	0.0288362	0.0032327	0.0190369		8.02089	1.07672	0.134239	0.129369		7.37262	0.440792	0.0597877	0.0900524
262584_at	At1g15440	Unique		8.02209	0.0116861	0.00146324	0.0134756		9.60914	0.0261858	0.00272509	0.0168402		8.10914	0.683316	0.0842648	0.101938		8.41443	0.292929	0.0348127	0.0643215
262585_at	At1g15460	Duplicate		2.17635	0.00508537	0.00233271	0.0327666		6.08455	0.0841766	0.0138345	0.0476835		4.17021	2.02955	0.48668	0.34162		2.92943	0.0404396	0.0138046	0.0686468
262597_at	At1g15470	Duplicate		6.88289	0.027469	0.00397572	0.0240797		9.06018	0.01898	0.00209488	0.0152059		7.90012	0.763806	0.0966828	0.110626		7.81291	0.0654778	0.00838072	0.0327517
262586_at	At1g15480	Duplicate		2.79939	0.00468192	0.00169377	0.0244427		7.14346	0.094562	0.0132376	0.0430477		5.37521	1.08308	0.201496	0.193613		5.66479	0.349903	0.0617681	0.104422
262587_at	At1g15490	Duplicate		4.54093	0.0454338	0.00998914	0.0469401		7.15923	0.0327865	0.00457961	0.0252919		6.18143	0.504942	0.0816868	0.114956		6.55697	0.137621	0.0209884	0.0565768
261767_s_at	At1g15500	Duplicate		9.69858	0.0485577	0.00492824	0.0227207		10.324	0.0578434	0.00560283	0.0232959		10.2087	0.476125	0.0466391	0.0675912		11.3448	0.088941	0.00783979	0.0262877
261762_at	At1g15510	Unique		6.0422	0.0306319	0.00505007	0.0289662		8.09314	0.125846	0.0155498	0.0438332		5.60698	0.859398	0.153273	0.165336		6.67695	0.336267	0.0503623	0.0868488
261763_at	At1g15520	Duplicate		2.26607	0.000128906	5.70234e-05	0.00501029		10.6244	0.0578134	0.00544158	0.0226314		4.23788	1.98636	0.468714	0.332567		4.40189	2.72568	0.619208	0.375058
261764_at	At1g15530	Unique		2.71304	0.00156591	0.000590263	0.0145857		4.97714	1.1012	0.221251	0.21084		3.36591	0.0968886	0.0287853	0.0924771		5.045	0.0390469	0.00773972	0.039168
261768_at	At1g15550	Duplicate		7.03282	0.4125	0.0598966	0.0913236		8.41944	0.280628	0.0333309	0.062919		6.2936	1.54473	0.245444	0.197482		7.71512	1.50459	0.195018	0.158989
261765_at	At1g15570	Duplicate		3.56543	0.0706429	0.0197776	0.0745457		7.45276	0.019613	0.00263165	0.0187912		5.77506	1.74467	0.302105	0.228718		6.23314	0.495989	0.0795729	0.112987
261766_at	At1g15580	Duplicate		2.21795	0.000375375	0.000170316	0.00873536		6.79701	0.36683	0.0539694	0.0891076		3.59816	0.219238	0.0609308	0.13013		5.03979	1.34748	0.267369	0.230329
261759_at	At1g15590	Unique		2.4199	0.00121774	0.000507221	0.0144205		4.70725	0.135529	0.0287916	0.0782076		3.10365	0.0620783	0.0200017	0.080278		3.29843	0.0183425	0.00556098	0.0410603
261760_at	At1g15600	Unique		1.91169	0.0227567	0.011744	0.0789108		6.66868	0.0397204	0.00595626	0.0298859		2.22748	0.0384976	0.0172831	0.0880854		2.50195	0.0344153	0.0137554	0.0741477
257480_at	At1g15640	Unique		1.78756	0.000822002	0.000461967	0.016039		4.80638	0.160725	0.0334399	0.083411		4.03078	0.705346	0.17499	0.208359		4.41241	0.0829705	0.0188039	0.0652809
261761_at	At1g15660	Unique		6.42316	0.0700101	0.010837	0.0411938		7.70047	0.0429536	0.00557805	0.0269143		7.59958	0.986833	0.129854	0.130717		8.24066	0.168228	0.0204144	0.0497722
259502_at	At1g15670	Duplicate		5.32333	0.516441	0.0933811	0.134998		9.91538	0.143292	0.0144515	0.038177		8.99235	2.75771	0.306673	0.184672		7.41629	1.59088	0.214511	0.170071
259504_at	At1g15690	Unique		12.6774	0.0198854	0.00156522	0.0111234		13.4901	0.0125547	0.000930661	0.00830593		12.3764	0.169956	0.0137323	0.0333101		13.1564	0.0959806	0.00729538	0.0235481
259485_at	At1g15700	Unique		4.73201	0.0775374	0.0162344	0.058845		7.29761	0.176312	0.0241603	0.0575388		6.33062	0.423375	0.0668773	0.102782		7.05422	0.0395822	0.00561114	0.0282034
259486_at	At1g15710	Unique		8.64144	0.0137015	0.00160916	0.0135456		9.31522	0.0647139	0.00694712	0.027309		7.98001	0.286489	0.0359008	0.0670734		8.7354	0.0980847	0.0112284	0.0358524
259487_at	At1g15720	Duplicate		2.6501	0.00913429	0.00343485	0.0360641		6.5114	0.0146318	0.00224711	0.018577		5.0537	0.448469	0.0887407	0.132512		4.91187	0.0696236	0.0141746	0.0537195
259499_at	At1g15730	Duplicate		9.23658	0.0437919	0.00477016	0.0226561		9.80264	0.0167605	0.00170979	0.0132069		8.49275	1.69572	0.199667	0.153331		10.3883	0.0904068	0.00870278	0.0289439
259500_at	At1g15740	Unique		6.70082	0.119372	0.018225	0.0515612		10.2828	0.0178493	0.00173584	0.0129927		8.96058	0.930052	0.103794	0.107626		9.19103	0.493573	0.0537016	0.0764384
259501_at	At1g15750	Duplicate		8.62255	0.0252357	0.00293549	0.0184235		9.83031	0.059811	0.00608435	0.0248785		9.61389	0.181472	0.0188761	0.0443105		10.0847	0.145232	0.0144013	0.0377893
259488_at	At1g15780	Unique		6.69203	0.0264147	0.00387519	0.0242865		8.58154	0.0897545	0.010459	0.034911		8.22965	0.227013	0.0275848	0.0578954		8.81864	0.116007	0.0131548	0.0386226
259489_at	At1g15790	Unique		3.05006	0.0039355	0.0013024	0.020568		8.05415	0.203834	0.0253079	0.0560555		5.63336	1.24865	0.221652	0.198359		5.7104	0.584252	0.102314	0.133855
259490_at	At1g15800	Duplicate		4.1643	0.0302762	0.00735559	0.0417839		7.46472	0.0380919	0.00510292	0.0261458		5.99155	0.296816	0.0495391	0.0909294		6.00894	0.188715	0.0314057	0.0722944
259505_at	At1g15810	Unique		6.87723	0.0851047	0.0122024	0.0424193		8.72412	0.0231765	0.0026566	0.0174503		7.6975	0.314653	0.0408773	0.0728729		7.60295	0.132031	0.0173658	0.0477921
259491_at	At1g15820	Unique		13.4799	0.0412551	0.00307165	0.0150679		14.2343	0.0178914	0.00125692	0.00939691		11.2938	7.89978	0.699476	0.248866		14.2023	0.309276	0.0217765	0.0391574
259492_at	At1g15830	Unique		4.52252	0.046867	0.0105892	0.0478688		5.17312	0.329744	0.0637417	0.111003		5.42782	0.318571	0.0586922	0.103987		7.14558	0.20724	0.0290025	0.0637088
259493_at	At1g15840	Unique		5.64792	0.0171532	0.0030902	0.0231891		6.50132	0.0407237	0.0062639	0.03104		6.64516	0.238016	0.0358179	0.0734171		7.11747	0.059793	0.00840087	0.0343557
259494_at	At1g15850	Unique		2.2709	0.000684972	0.000303773	0.0115249		5.87392	0.0511961	0.00871582	0.0385203		2.87901	0.123675	0.0429575	0.122151		3.34911	0.0133903	0.00399816	0.0345513
259497_at	At1g15860	Unique		7.53367	0.0397339	0.00520584	0.026459		9.29738	0.0601134	0.00646563	0.0263709		8.35497	0.148097	0.0177256	0.0460604		8.64617	0.0977854	0.0113097	0.036167
259503_at	At1g15870	Unique		4.09823	0.0401273	0.00994459	0.0488791		7.71948	0.112444	0.0145663	0.0434391		4.82323	0.305646	0.0633697	0.114623		5.14624	0.150013	0.0291499	0.0752616
259498_at	At1g15880	Unique		4.68794	0.184884	0.0390924	0.0917207		9.63898	0.0302678	0.00314014	0.0180492		9.05289	0.398082	0.043973	0.0696946		9.28807	0.0752593	0.00810279	0.0295362
259495_at	At1g15890	Duplicate		1.72486	0.00463224	0.00267257	0.0394586		5.46696	0.933063	0.170673	0.176689		3.91479	1.17329	0.299707	0.276691		4.6047	0.390753	0.0848596	0.135753
259496_at	At1g15900	Unique		2.68198	0.0013043	0.000490638	0.0134658		5.6759	0.181611	0.0319969	0.0750821		3.41617	0.109249	0.03198	0.0967541		4.19125	0.0407163	0.00971459	0.0481438
261837_s_at	At1g15910	Duplicate		7.09085	0.248828	0.0350474	0.0703479		6.88067	0.196839	0.0286075	0.0644799		8.01839	0.83793	0.104501	0.114161		8.66364	0.11091	0.0128018	0.0384402
261841_at	At1g15920	Duplicate		6.49349	0.0843138	0.012681	0.0447169		9.57161	0.0171504	0.0017918	0.0136821		8.23294	0.633996	0.0770073	0.0967138		8.45799	0.047299	0.00559223	0.0257134
261789_at	At1g15930	Duplicate		12.4677	0.01478	0.00119029	0.00975104		13.1311	0.0299088	0.00227771	0.0131704		11.9728	0.806391	0.0673518	0.0750026		12.5267	0.133692	0.0106726	0.0291889
261844_at	At1g15940	Unique		5.57887	0.0248987	0.00450628	0.0282841		6.48434	0.269658	0.0415861	0.0800831		7.70672	0.807534	0.104783	0.116603		8.43461	0.047212	0.00559741	0.0257609
261792_at	At1g15950	Duplicate		8.38183	0.0986811	0.0117324	0.0374782		11.2751	0.0826197	0.00732762	0.025493		9.24165	0.995302	0.107697	0.107951		10.026	0.312386	0.0311575	0.0557464
261845_at	At1g15960	Unique		3.84047	0.200691	0.051308	0.116649		7.0932	0.168555	0.023763	0.0578801		5.38292	2.59583	0.482235	0.29931		6.50819	0.766207	0.11773	0.134497
261788_at	At1g15980	Unique		11.6932	0.0118013	0.00100442	0.00929037		11.8308	0.00725746	0.00061344	0.00720078		8.99167	8.75656	0.973853	0.329099		12.7519	0.190868	0.0149679	0.0342605
261786_at	At1g15990	Duplicate		2.68588	0.000567412	0.00021243	0.00886876		4.74746	0.136976	0.0288525	0.0779582		2.99599	1.0083	0.33655	0.335162		3.13836	0.0649222	0.0206867	0.0811883
261790_at	At1g16000	Unique		8.21028	0.0368238	0.00447625	0.0233726		10.4772	0.0405987	0.00387496	0.0192314		8.24335	0.60984	0.0739797	0.0947336		8.52612	0.262608	0.0308004	0.0601039
261795_at	At1g16010	Duplicate		7.96958	0.00677529	0.00085385	0.0103283		10.0505	0.0359011	0.00357208	0.0188524		9.05818	0.0872282	0.00962977	0.0326052		9.5267	0.105834	0.0111092	0.0341484
261787_at	At1g16020	Duplicate		6.51482	0.0201913	0.00311575	0.0218112		8.95804	0.012522	0.00139785	0.0124918		6.8581	0.192551	0.0280764	0.0639836		7.61006	0.0663493	0.00871862	0.0338478
261838_at	At1g16030	Duplicate		4.00942	0.0762296	0.0190388	0.068862		6.93105	0.123207	0.0177761	0.050643		5.75056	2.11813	0.368334	0.253085		6.37714	1.97862	0.310268	0.220574
261839_at	At1g16040	Unique		3.94168	0.0396996	0.00985546	0.050549		8.16862	0.0495858	0.00607028	0.0272603		6.67632	0.373742	0.0559802	0.0915691		6.12764	0.224279	0.0366012	0.077286
261835_at	At1g16050			2.83483	0.000122971	4.3432e-05	0.00391178		6.49358	0.0480222	0.00739534	0.0337471		3.91151	0.0779464	0.0199274	0.0713762		5.35776	0.099365	0.018546	0.0588347
261794_at	At1g16060	Duplicate		4.85255	0.248801	0.0501599	0.102791		7.97476	0.0341279	0.0042795	0.0231653		6.67006	1.11743	0.16753	0.158483		6.15814	0.422638	0.0686308	0.105569
261840_at	At1g16070	Unique		2.84087	0.0469604	0.0162445	0.0762806		6.45331	0.0400868	0.00621181	0.0310254		4.38436	2.10328	0.479723	0.330782		5.16475	0.217073	0.0420297	0.0902098
261793_at	At1g16080	Unique		10.5303	0.0239849	0.00226139	0.0147071		10.6958	0.0203322	0.00190095	0.0133315		8.77148	1.75539	0.200125	0.151048		10.5151	0.214737	0.0204218	0.0440698
261836_at	At1g16090	Unique		3.51738	0.0258365	0.00732458	0.045698		7.27024	0.0115297	0.00158588	0.0147693		5.03284	0.29234	0.0580866	0.107431		6.35862	0.509061	0.0800584	0.112208
257478_at	At1g16130	Tandem Duplicate		3.20231	0.00250038	0.000792059	0.0156149		5.76293	0.222285	0.0385715	0.081811		5.23385	1.70461	0.32569	0.249455		5.60728	0.810992	0.144632	0.160604
257479_at	At1g16150	Tandem Duplicate		3.03196	0.00359288	0.00119426	0.0197696		5.12788	0.0491734	0.00958942	0.0432441		4.07286	0.510173	0.125262	0.175372		4.65411	0.0511805	0.0109968	0.0486089
261842_at	At1g16160	Tandem Duplicate		2.74134	0.000941844	0.000346291	0.0111951		5.45632	0.033508	0.00614113	0.0335486		2.95821	0.14514	0.0490634	0.128785		4.02971	0.0369284	0.00916404	0.0476877
261791_at	At1g16170	Duplicate		8.04497	0.332236	0.0425053	0.0716472		9.10265	0.157508	0.0173035	0.0435997		8.77672	0.716945	0.0816871	0.096474		8.33598	0.347546	0.0416923	0.0707212
261843_at	At1g16180	Duplicate		9.52726	0.0127214	0.00134136	0.0118386		12.583	0.0103582	0.000823187	0.0080883		11.0827	0.275181	0.0248299	0.0473331		11.2263	0.0916133	0.00816059	0.0269614
262708_at	At1g16190	Duplicate		4.08719	0.120723	0.0293679	0.08501		7.58946	0.0561876	0.00740337	0.0312327		5.47917	0.417629	0.0762213	0.117945		5.37246	0.26568	0.0494522	0.0959414
262710_at	At1g16210	Unique		8.76031	0.0449882	0.00518625	0.024212		10.2701	0.138005	0.0134376	0.0361721		9.9778	0.149808	0.0150142	0.0387912		10.0007	0.078695	0.00786898	0.0280508
262702_at	At1g16220	Duplicate		3.21421	0.01846	0.00577212	0.042271		5.78356	0.101221	0.0175015	0.0550097		4.92522	0.559458	0.11359	0.151865		5.78589	0.136814	0.0236462	0.0639286
262709_at	At1g16240	Duplicate		8.83298	0.00677192	0.000766624	0.00931641		11.0352	0.0125288	0.00113536	0.0101432		10.3976	0.221562	0.021309	0.0452706		10.5661	0.082038	0.00776423	0.0271076
262705_at	At1g16260	Unique		5.29383	0.473429	0.0912032	0.129974		7.95697	3.31161	0.416189	0.228703		6.3568	4.05546	0.637973	0.316798		8.96928	0.379089	0.0422652	0.0686456
262706_at	At1g16280	Unique		6.33462	0.0523729	0.00817518	0.0361271		8.42441	0.0259316	0.00307815	0.019115		6.26858	0.416191	0.0663932	0.102915		7.3491	0.190063	0.025862	0.0593218
262707_at	At1g16290	Unique		2.61403	0.000605985	0.000239158	0.00941719		6.53118	0.0313902	0.00480621	0.0271272		4.37273	1.47933	0.338307	0.27815		3.93781	0.060801	0.0154403	0.0626182
262751_at	At1g16310	Duplicate		2.64784	0.146305	0.0543123	0.144456		6.51046	0.644573	0.0990057	0.123317		5.98476	1.32562	0.2215	0.192382		5.96598	0.249354	0.041796	0.0837003
262752_at	At1g16330	Unique		4.42504	0.0163693	0.00366475	0.0289133		6.49486	0.117731	0.0181267	0.0528293		5.19207	1.18274	0.227798	0.209461		5.4337	0.198687	0.0365658	0.0820332
262753_at	At1g16340	Duplicate		6.53391	0.0406072	0.00611941	0.030841		7.97843	1.50994	0.189253	0.154015		7.39695	0.92793	0.125448	0.130228		7.75368	0.161848	0.0208737	0.0518855
262754_at	At1g16350	Duplicate		9.38026	0.0284175	0.00304473	0.0179712		10.5109	0.0833491	0.00792976	0.0274669		8.59022	1.35026	0.157186	0.135271		9.29702	0.201794	0.0217053	0.0483182
262755_at	At1g16360	Duplicate		2.90613	0.0111813	0.00391688	0.0363858		5.78582	0.045249	0.00782066	0.0367654		4.38779	1.86918	0.425995	0.311587		4.75763	0.0893751	0.0187856	0.0628373
262756_at	At1g16370	Duplicate		2.87951	0.419059	0.157194	0.224812		7.29939	0.231517	0.0317174	0.0659182		4.2709	3.34951	0.784263	0.42852		4.22084	1.82889	0.433299	0.320401
262757_at	At1g16380	Duplicate		2.71883	0.00161054	0.0005961	0.0147606		3.07951	0.0357357	0.0116043	0.061386		3.00916	0.881941	0.293085	0.312086		3.34256	0.0346739	0.0103735	0.0557086
262730_at	At1g16390	Duplicate		4.74816	2.10496	0.42425	0.30556		6.48789	0.0610884	0.00941575	0.0380957		5.77539	3.02399	0.523599	0.301099		7.24155	1.47683	0.203938	0.167816
262717_s_at	At1g16410	Tandem Duplicate		6.15356	1.70315	0.255428	0.212081		8.39861	1.08034	0.128633	0.123758		6.6401	3.19584	0.481294	0.269227		7.90436	0.635644	0.0804168	0.100865
262731_at	At1g16420	Unique		2.80645	0.00276005	0.00100092	0.0187198		6.65209	0.477361	0.0717611	0.103864		3.54599	0.956331	0.269694	0.275782		5.01989	1.26116	0.251232	0.223713
262714_s_at	At1g16430	Unique		6.91414	0.0605686	0.00868182	0.0355947		9.2669	0.0263144	0.00283961	0.017505		7.95591	0.153261	0.0192638	0.0492069		8.13414	0.0537934	0.00661328	0.0285136
262732_at	At1g16440	Unique		2.2913	0.000596126	0.000262056	0.0106558		3.11758	0.252929	0.08113	0.161318		2.43078	0.244424	0.100554	0.203388		2.84176	0.00918138	0.00323087	0.0337183
262712_at	At1g16460	Duplicate		7.73872	0.446492	0.0585329	0.086345		10.3251	0.333877	0.0323363	0.0559626		9.43012	0.60943	0.0646259	0.0827837		9.81423	0.075755	0.0077189	0.0280446
262716_at	At1g16470	Duplicate		8.53835	0.0265445	0.00308429	0.0190815		11.1343	0.0108093	0.000970815	0.00933764		9.84464	0.203954	0.0207172	0.0458739		10.2015	0.0966247	0.00947164	0.0304706
262701_at	At1g16480	Unique		2.95043	0.000847248	0.000289151	0.0098655		5.87509	0.195315	0.0332445	0.0752234		4.21657	0.187097	0.044372	0.102583		4.58722	0.0854774	0.0186338	0.0637348
262715_at	At1g16490	Duplicate		2.45137	0.00183563	0.00075139	0.0174777		5.89038	0.0835889	0.0141907	0.049083		3.92476	1.56988	0.399994	0.319242		4.1332	0.138753	0.0335705	0.090123
262711_at	At1g16500	Duplicate		6.01413	0.0542586	0.00912828	0.0387312		9.15634	0.0849399	0.00927663	0.0318298		6.7444	0.6419	0.0951753	0.118793		6.85802	0.238897	0.0348347	0.07127
262703_at	At1g16510	Duplicate		4.92669	0.00157362	0.000326122	0.00805182		9.00948	0.127823	0.0141876	0.039683		7.35994	1.1927	0.162053	0.148385		6.46757	0.253624	0.0392146	0.077867
262713_at	At1g16520	Duplicate		6.15483	0.0541546	0.00879631	0.0378096		7.75822	0.0441459	0.00569021	0.0270821		6.76321	1.03152	0.15252	0.150171		7.0156	0.161259	0.0229858	0.0572397
262704_at	At1g16530	Duplicate		2.48806	0.00584807	0.0023524	0.0307359		7.05197	0.0462324	0.00655595	0.0304904		4.39676	2.17113	0.493802	0.335127		2.88238	0.03314	0.0114975	0.0631575
246325_at	At1g16540	Unique		2.98322	0.0127124	0.00424337	0.0377944		6.96728	0.109944	0.0157801	0.0475908		5.62744	0.715964	0.127227	0.150361		5.16522	0.590615	0.114345	0.148786
246320_at	At1g16560	Duplicate		6.08958	0.579484	0.0931556	0.125007		10.5653	0.279	0.0264073	0.0499944		8.07378	0.298182	0.0369322	0.0676339		7.35169	0.145512	0.019793	0.0518875
246351_at	At1g16570	Unique		6.37031	0.0285632	0.00448165	0.0265303		9.01949	0.0498867	0.00553099	0.0247634		8.0346	0.104859	0.013051	0.0403032		8.39352	0.0973964	0.0116038	0.0371816
246326_at	At1g16590	Unique		4.08844	0.100363	0.0241442	0.077487		7.69448	0.0894725	0.0116281	0.0388746		4.92274	0.609262	0.123765	0.158561		5.08591	0.0858808	0.016886	0.0576208
246324_at	At1g16610	Unique		6.86956	0.087776	0.0125876	0.043128		8.94232	0.0697844	0.00780384	0.0295413		8.05464	0.468941	0.0582199	0.0850183		8.1136	0.0402358	0.00495906	0.0247225
246321_at	At1g16640	Unique		3.08274	0.00404128	0.00132722	0.0206216		5.98656	0.171693	0.0286797	0.0692147		4.2886	0.33675	0.0785222	0.135313		4.36243	0.122334	0.0280426	0.0801761
246350_at	At1g16650	Unique		4.76136	0.106684	0.022248	0.068599		7.61343	0.0665161	0.00873668	0.0338753		6.15009	0.362876	0.0590033	0.0979484		6.64043	0.117988	0.0177681	0.0517277
246327_at	At1g16670	Unique		3.94521	0.0349587	0.00887973	0.0473923		9.54897	0.0342569	0.00358749	0.0193828		7.20669	0.855772	0.118747	0.128364		7.51467	0.310095	0.0412652	0.0741032
246322_at	At1g16680	Unique		5.5447	0.0282234	0.00503279	0.0302988		8.27039	0.0618442	0.00747778	0.0300693		7.32918	0.318787	0.0434956	0.0770363		8.09346	0.0927592	0.011461	0.0376309
246323_at	At1g16690	Duplicate		4.62009	0.00924366	0.00200005	0.02081		7.58282	0.0145353	0.00191687	0.0158994		5.8812	0.160848	0.0273496	0.0681934		6.14207	0.0348977	0.00568175	0.0304147
255768_at	At1g16705	Unique		2.05084	0.00038122	0.000187742	0.00952042		6.17724	0.0599534	0.00970554	0.0396381		4.31812	6.80824	1.57667	0.604259		2.63179	0.0838471	0.0318593	0.110025
255762_at	At1g16710	Duplicate		5.08249	0.0235479	0.00456735	0.0301926		8.02681	0.039101	0.0048713	0.0246349		6.69972	0.295194	0.0440606	0.0810956		7.39644	0.0788219	0.0106567	0.0379578
255764_at	At1g16720	Unique		10.0307	0.0552162	0.00553962	0.0234263		10.6961	0.0122946	0.00114945	0.0103665		9.20441	1.79312	0.194811	0.145482		11.5385	0.246153	0.0213332	0.0429985
255763_at	At1g16730	Unique		3.14685	0.170731	0.0560118	0.131305		4.83634	1.40571	0.290655	0.245149		5.66005	2.41302	0.426325	0.274448		6.2456	0.870122	0.139318	0.149354
255767_at	At1g16740	Unique		8.54185	0.0222295	0.00261818	0.0174547		10.819	0.0145311	0.00134312	0.011142		9.17913	0.364272	0.0396848	0.0657524		9.40972	0.0900825	0.00957335	0.0318965
255766_at	At1g16750	Duplicate		6.46336	0.110303	0.0168158	0.0513849		8.00248	0.0207893	0.00259786	0.0180175		6.25836	1.51095	0.24143	0.196411		7.28408	0.163148	0.0223979	0.055452
255765_at	At1g16760	Duplicate		2.06726	0.00052074	0.000253392	0.0110387		4.02818	0.184662	0.0458425	0.106679		2.49599	1.90446	0.763006	0.552895		2.02096	0.0131975	0.00653033	0.0568446
255761_at	At1g16770	Unique		2.88578	0.000272589	9.4813e-05	0.00572125		5.10223	0.134027	0.0262684	0.0717524		2.34869	2.73576	1.1648	0.704228		3.02139	0.0129392	0.00428253	0.0376484
255760_at	At1g16780	Duplicate		6.21214	0.0804103	0.0126407	0.0456472		7.96114	0.364515	0.0457868	0.0758372		6.94008	1.14883	0.165536	0.154442		7.69629	0.165292	0.0214769	0.0528257
255759_at	At1g16790	Unique		6.09794	0.0402101	0.00652864	0.032884		8.56319	0.0555718	0.00648962	0.0275291		6.60503	0.613496	0.0928833	0.118585		6.98785	0.0844574	0.0120863	0.0415887
255758_at	At1g16800	Unique		3.44752	0.0109193	0.00319641	0.0303103		5.38057	0.0629377	0.0116972	0.0466259		4.5732	0.16979	0.0371271	0.0901023		5.42665	0.05002	0.00921747	0.0412135
256113_at	At1g16810	Unique		9.25239	0.0538035	0.00575719	0.0250698		10.576	0.016948	0.0016025	0.0123095		10.7485	0.180474	0.0167906	0.0395238		10.8873	0.104131	0.00956438	0.0296393
256111_at	At1g16820	Unique		3.53454	0.0254618	0.00719302	0.0451453		6.20487	0.278248	0.0448435	0.0850126		5.5039	0.11133	0.0202275	0.0606227		5.03935	0.0660739	0.0131116	0.0510083
256107_at	At1g16830	Unique		2.70162	0.00116351	0.000436775	0.0126258		6.79169	0.0888835	0.0130871	0.0438968		3.69438	0.13487	0.0365069	0.0994069		5.43906	0.152418	0.0280228	0.0717785
256117_at	At1g16840	Duplicate		5.98392	0.12365	0.0207844	0.058764		10.5111	0.0893978	0.0085051	0.0284456		8.17584	0.363286	0.044434	0.0737211		8.79084	0.407325	0.0463351	0.0726005
256114_at	At1g16850	Unique		2.61355	0.000174238	6.69797e-05	0.00505057		9.03932	0.76217	0.0843172	0.0965807		5.16655	3.75639	0.72706	0.375132		4.64645	5.80059	1.24839	0.51834
256116_at	At1g16860	Duplicate		7.36722	0.023942	0.00324465	0.0210028		9.32638	0.0183798	0.00197074	0.0145364		8.39482	0.408595	0.0486722	0.0761439		8.03716	0.336372	0.041852	0.0721617
256106_at	At1g16870	Unique		8.77694	0.0332853	0.00377632	0.0207866		10.4327	0.0102891	0.000986232	0.0097228		8.55173	0.703511	0.0822654	0.0980803		9.13183	0.0843755	0.00923971	0.031809
256115_at	At1g16880	Unique		12.1323	0.0246995	0.00204378	0.0129539		12.9564	0.0110938	0.000856242	0.00812935		10.7776	3.73498	0.346551	0.179318		12.373	0.223015	0.0180243	0.0381672
256110_at	At1g16900	Unique		5.87144	0.199589	0.0337992	0.0760894		8.9584	0.103933	0.0116017	0.0359871		7.08301	0.549951	0.0776436	0.104699		7.26391	0.137202	0.0188881	0.0509929
256105_at	At1g16910	Unique		2.87589	0.0178827	0.00619216	0.046499		4.94678	0.107433	0.0217178	0.0662592		4.31612	0.15553	0.0360347	0.0913721		5.04101	0.0834002	0.0165443	0.0572883
256112_at	At1g16920	Duplicate		8.66727	0.0192531	0.00222452	0.0160091		10.4125	0.0792683	0.00761277	0.0270391		8.82911	1.71302	0.194019	0.148239		9.28973	0.212199	0.0228424	0.0495872
256108_at	At1g16940	Unique		2.27479	0.000950174	0.000421446	0.0135507		6.2526	0.0242644	0.0038807	0.0249129		3.30127	0.067188	0.0203522	0.0785172		4.17301	0.0619002	0.0148335	0.0596206
256109_at	At1g16950	Unique		2.17303	0.000469343	0.000217226	0.00996963		4.68198	0.128419	0.0274283	0.0765394		2.31905	0.522857	0.225461	0.311803		2.12188	0.00343596	0.0016193	0.0276251
256118_at	At1g16970	Unique		5.4917	0.0189721	0.00337819	0.0250813		8.6348	0.0374874	0.00434143	0.0224228		6.98062	0.520326	0.0745386	0.103334		7.85749	0.0902472	0.0114855	0.0382325
256104_at	At1g16980	Tandem Duplicate		2.12763	0.00054394	0.000257646	0.0109618		4.25315	0.213254	0.0501402	0.108577		2.60051	0.541378	0.208182	0.282938		2.50426	0.00976529	0.00389947	0.0394605
262535_at	At1g17000	Tandem Duplicate		2.58722	0.00146068	0.000570031	0.0147721		3.70015	0.0734488	0.0198502	0.0732441		2.8947	0.110184	0.0380641	0.114672		3.03792	0.0213751	0.0070361	0.0481258
262527_at	At1g17010	Tandem Duplicate		2.33396	0.000860736	0.00037094	0.0125702		2.13815	0.131687	0.0615892	0.16972		2.82874	2.1719	0.767796	0.520986		2.60175	0.00947541	0.00364194	0.0374139
262482_at	At1g17020	Tandem Duplicate		2.68096	0.001489	0.000557614	0.0143932		8.01411	0.291174	0.0363327	0.0673319		5.36524	5.18144	0.965743	0.424264		5.28704	2.30351	0.43569	0.287066
262534_at	At1g17040	Duplicate		3.14712	0.0230011	0.00735861	0.0481905		7.38178	0.00684142	0.000926799	0.011205		5.73798	0.34079	0.0593919	0.101738		6.34817	0.0510437	0.0080407	0.0355896
262526_at	At1g17050	Duplicate		9.83326	0.0446635	0.00459297	0.0214921		8.59082	0.0664201	0.00773152	0.0299996		8.71722	1.34092	0.153825	0.132838		10.52	0.877055	0.0833698	0.0890216
262525_at	At1g17060	Unique		2.69793	0.00295865	0.00114885	0.0201612		5.61066	0.0883943	0.0157547	0.0529905		4.60214	4.16459	0.904925	0.443431		3.33899	0.335206	0.100391	0.173397
262524_at	At1g17070	Duplicate		6.02365	0.0182274	0.00294761	0.0224131		8.18068	0.0511316	0.00625029	0.0276411		7.35296	0.185719	0.0252577	0.0586092		7.39196	0.0940801	0.0127274	0.0414944
262481_at	At1g17080	Duplicate		8.21376	0.01054	0.00128824	0.0124991		11.8014	0.0215824	0.0018288	0.0124485		9.88536	0.516748	0.052274	0.0727188		10.152	0.0853615	0.00840832	0.0287792
262533_at	At1g17090	Unique		7.11066	0.459518	0.0639413	0.0953325		7.40213	0.0530364	0.00716501	0.0311121		6.46865	1.66236	0.256987	0.199319		5.80778	0.819231	0.141058	0.155845
262536_at	At1g17100	Unique		11.0514	0.111071	0.0100685	0.0301565		11.8124	0.0424254	0.0035916	0.0174371		9.14666	3.1901	0.348772	0.195272		9.95436	0.445956	0.0448	0.0670861
262523_at	At1g17110	Unique		6.49299	0.00941828	0.00145147	0.0149466		8.70964	0.165468	0.0189983	0.0467043		8.02358	0.254189	0.0316802	0.0628363		8.2752	0.0521875	0.00630649	0.0276061
262522_at	At1g17120	Duplicate		5.39743	0.0434735	0.00830023	0.0386301		8.95863	0.0336441	0.00375549	0.0204745		7.10654	0.389062	0.054747	0.087771		7.86458	0.0671047	0.00853252	0.0329383
262521_at	At1g17130	Unique		6.93198	0.0225912	0.00325259	0.0216826		8.64153	0.0717213	0.00829961	0.0309908		8.13451	0.240457	0.0295602	0.060282		8.40849	0.0843507	0.0100316	0.0345403
262538_at	At1g17140	Duplicate		6.46308	0.0670002	0.0103883	0.0400496		7.24302	0.0825506	0.0113973	0.039668		7.004	1.7199	0.24556	0.187243		8.05425	0.147606	0.0183265	0.047701
262512_at	At1g17145	Unique		4.4418	0.0307012	0.00670953	0.0394474		8.1194	0.178593	0.0219959	0.0520486		7.36877	0.395718	0.053702	0.0853686		8.07472	0.156094	0.0193311	0.0489289
262520_at	At1g17150	Duplicate		2.4697	0.000828635	0.000338033	0.0116557		4.65131	0.0585237	0.0125822	0.0520105		2.50292	0.114056	0.045569	0.134931		3.22103	0.0260601	0.00809062	0.050118
262519_at	At1g17160	Unique		5.71185	0.642115	0.111693	0.140291		8.94573	0.0732624	0.00818966	0.0302569		8.46231	0.116754	0.0137969	0.0403781		8.7441	0.174352	0.0199394	0.0477528
262518_at	At1g17170	Tandem Duplicate		3.19991	0.0064269	0.00202246	0.0250532		10.5192	0.109141	0.0103754	0.0314059		6.45919	4.25219	0.658316	0.319248		6.00425	2.37809	0.396068	0.256836
262517_at	At1g17180	Tandem Duplicate		2.87497	0.00297464	0.00104059	0.0189707		7.83971	0.947926	0.120913	0.12419		4.31441	4.52352	1.04847	0.492965		4.12997	0.745364	0.180477	0.209044
262516_at	At1g17190	Tandem Duplicate		5.0656	2.90133	0.524075	0.336254		6.3681	0.454402	0.071356	0.105855		6.71906	3.51114	0.522564	0.278879		5.97704	0.342689	0.0573343	0.0979409
262539_at	At1g17200	Unique		9.24192	0.0431624	0.00466768	0.0224797		10.6683	0.125758	0.011788	0.0332408		8.32667	4.51598	0.542352	0.255214		9.53428	0.189455	0.0198709	0.0456525
262532_at	At1g17210	Unique		7.48969	0.0228373	0.00304894	0.0201771		8.99583	0.0245434	0.0027283	0.0174151		8.77458	0.258011	0.0294044	0.0578886		8.73988	0.0531712	0.00608374	0.0263835
262483_at	At1g17220	Unique		11.6336	0.0162761	0.00141068	0.0109663		12.024	0.0991151	0.00824314	0.0261832		10.1376	2.49265	0.245883	0.155739		12.429	0.119912	0.00964769	0.0278608
262531_at	At1g17230	Duplicate		3.29534	0.00425559	0.00126875	0.0197961		6.93483	0.0857059	0.0123588	0.0422153		6.00896	1.04819	0.174439	0.170381		7.12846	0.278247	0.0390332	0.0739978
262530_at	At1g17240	Tandem Duplicate		1.84508	0.00206285	0.00115558	0.024616		6.17616	0.187683	0.0303883	0.0701446		3.66027	0.349144	0.0953876	0.161432		3.6381	0.274572	0.0754712	0.14403
262529_at	At1g17250	Tandem Duplicate		1.76889	0.00793594	0.00457694	0.0503613		7.83964	0.449154	0.0572927	0.0854873		3.39242	0.446221	0.131535	0.196909		3.19084	0.0867254	0.0271795	0.0922928
262528_at	At1g17260	Duplicate		2.2218	0.00316407	0.00142637	0.0253174		5.75655	0.0374763	0.00651021	0.0336292		3.37399	1.37211	0.406672	0.347176		3.17018	0.0567535	0.0179023	0.0751472
262537_s_at	At1g17280	Duplicate		8.03956	0.0178786	0.00221143	0.0166316		10.8179	0.0232589	0.00215004	0.0140978		9.06244	0.16544	0.0182556	0.0448824		9.76987	0.0502897	0.00514742	0.0229536
260847_s_at	At1g17290	Duplicate		9.52966	0.0358581	0.0037193	0.0198708		12.7392	0.0134168	0.00105319	0.00909246		10.6892	0.545759	0.0510572	0.0691125		11.6343	0.23946	0.0205823	0.0420608
260846_at	At1g17300	Unique		3.74976	0.00717939	0.00194402	0.0225964		3.59373	0.151858	0.0422565	0.108436		4.77508	0.752683	0.157627	0.181688		4.56818	0.0836116	0.018303	0.063298
260845_at	At1g17310	Unique		2.62799	0.000837012	0.000320605	0.0110089		4.03006	0.245873	0.0610098	0.123039		2.88037	1.02358	0.355363	0.351247		3.25294	0.0236909	0.00728292	0.0473167
261029_at	At1g17330	Unique		2.83776	0.00147576	0.000520699	0.0135373		7.23676	0.382752	0.0528899	0.0854898		5.02862	0.191484	0.0380789	0.0870198		5.64854	0.0456073	0.00807417	0.0378077
261060_at	At1g17340	Unique		3.43838	0.0502424	0.0151296	0.06519		8.57059	0.0526623	0.00614454	0.0267756		6.16313	0.997445	0.161841	0.162048		7.30383	0.259542	0.0355351	0.0697515
261087_at	At1g17350	Duplicate		6.60939	0.0286276	0.00430333	0.0255995		8.29212	0.143406	0.0172943	0.0456687		7.46454	0.488776	0.0654797	0.0936595		7.76976	0.0587172	0.00755715	0.0311871
261031_at	At1g17360	Unique		8.21269	0.0216571	0.00268098	0.017919		8.46266	0.0706646	0.00835016	0.0314119		7.90056	0.921392	0.116624	0.121497		9.81467	0.44029	0.0448604	0.0676073
261040_at	At1g17370	Duplicate		9.02676	0.0131064	0.00146487	0.0126826		10.3476	0.0354746	0.00342829	0.018202		9.18242	0.196729	0.0214245	0.0483033		10.235	0.0968629	0.00946394	0.0304084
261033_at	At1g17380	Duplicate		2.90394	0.0715218	0.0266674	0.092094		8.2069	0.209044	0.0254717	0.0557109		7.78488	3.36542	0.432302	0.23565		6.49014	3.2215	0.496368	0.276551
261035_at	At1g17390			2.53464	0.00141002	0.000561273	0.0148149		2.39924	0.563649	0.234928	0.312918		2.56837	0.115907	0.0451283	0.132555		2.68788	0.0208406	0.00775354	0.0537087
261030_at	At1g17410	Unique		2.54541	0.00769466	0.00301542	0.0344617		8.14988	0.00572388	0.000702327	0.00928312		5.86308	0.157637	0.0268864	0.0677179		6.00866	0.0761577	0.0126747	0.0459282
261037_at	At1g17420	Duplicate		3.25603	0.0680383	0.0207208	0.0801102		8.41136	0.051238	0.00609153	0.026911		7.27865	4.39925	0.604405	0.288163		6.87693	2.50231	0.36387	0.230026
261032_at	At1g17430	Duplicate		2.88306	0.0207168	0.00724479	0.0499238		9.00005	0.0342326	0.0038036	0.0205577		7.51756	1.58324	0.210605	0.167377		7.11033	0.517549	0.0727883	0.101178
261041_at	At1g17440	Unique		6.97945	0.0236496	0.00337261	0.0220339		9.45773	0.0456825	0.00483018	0.0225989		8.0121	0.132369	0.0165212	0.0454095		8.85799	0.0667734	0.00753822	0.029172
261034_s_at	At1g17450	Unique		3.24236	0.0122006	0.00383461	0.0340667		6.30584	0.056707	0.00899279	0.0377638		5.67726	0.238863	0.0420736	0.0860866		6.34583	0.15818	0.0249267	0.0626741
261039_at	At1g17455	Duplicate		4.43542	0.0415138	0.00944934	0.0459368		7.8878	0.0300813	0.00381365	0.0219883		7.00777	0.275979	0.0393819	0.074965		6.7509	0.414721	0.061432	0.095393
261086_at	At1g17460	Duplicate		2.35787	0.0347745	0.014495	0.0790879		7.76114	0.0984717	0.0126878	0.0404324		4.91029	0.757376	0.154243	0.177235		5.50374	1.39209	0.252935	0.214376
261036_at	At1g17470	Duplicate		8.40341	0.024506	0.00291646	0.0186286		10.3324	0.00970551	0.000939329	0.00953474		9.1629	0.112577	0.0122862	0.0366178		9.64114	0.0344979	0.0035782	0.019265
261085_at	At1g17480	Duplicate		4.10481	0.0421861	0.0102423	0.050037		6.60994	0.15451	0.0233754	0.0594677		5.48749	0.773329	0.140926	0.160254		5.39502	0.160185	0.0296913	0.0741854
261038_at	At1g17490	Unique		7.24391	0.0171597	0.00240551	0.0180835		9.72324	0.0494238	0.00508306	0.0228642		9.32346	0.222891	0.0239064	0.0506371		10.0021	0.162138	0.0162104	0.040258
260731_at	At1g17500	Duplicate		3.94977	0.061935	0.0154982	0.0630081		9.18803	0.0809645	0.00881196	0.0309689		6.6442	0.553526	0.0833096	0.111976		6.68177	0.152749	0.0228605	0.0584921
260682_at	At1g17510	Unique		6.61374	0.04296	0.00640038	0.031339		9.59839	0.0301479	0.00314093	0.0180896		7.67174	0.568255	0.0740713	0.0982603		7.7379	0.228813	0.0295704	0.0618183
260732_at	At1g17520	Duplicate		4.74513	0.023031	0.00482486	0.0319822		7.347	0.0399755	0.00544107	0.0272137		6.5811	0.290893	0.0442013	0.0819536		6.98172	0.0468744	0.00671388	0.0310103
260687_at	At1g17530	Duplicate		5.93744	0.0258247	0.00440318	0.0270656		9.19673	0.0200548	0.00218064	0.0153984		7.94286	0.335573	0.0422484	0.0729317		7.33585	0.361168	0.0492333	0.0819227
260737_at	At1g17540	Unique		2.03966	0.000475092	0.000233823	0.0106864		5.58332	0.0505372	0.00905145	0.0402636		3.49885	3.71819	1.06269	0.551112		2.55641	0.0226431	0.00885742	0.0588625
260710_at	At1g17545	Unique		2.14921	0.000510627	0.000239084	0.0105141		5.17963	0.0649394	0.0125375	0.0491989		2.28808	0.0433679	0.0189538	0.0910151		2.93769	0.0170523	0.00580467	0.0444515
260712_at	At1g17550	Duplicate		5.80851	0.0140962	0.00242818	0.0204403		9.21707	0.0771453	0.00836983	0.0301344		8.08351	0.289596	0.0358254	0.0665726		8.70982	0.320084	0.0367498	0.0649566
260683_at	At1g17560	Unique		6.03121	0.301107	0.0485908	0.0909821		8.2868	0.0855263	0.0103208	0.0352909		6.40916	2.04291	0.318748	0.223009		5.99125	0.519348	0.0866845	0.120285
260711_at	At1g17580	Duplicate		6.98055	0.0198755	0.00286393	0.0201962		8.13204	0.12256	0.0150712	0.0430502		7.71388	0.347568	0.0450575	0.076427		7.83785	0.0280924	0.0035842	0.0213844
260684_at	At1g17590	Duplicate		2.12699	0.00864869	0.00412181	0.0437231		7.67896	0.0285789	0.00372172	0.0220151		4.80558	0.49681	0.103382	0.146673		4.95782	0.160455	0.0323641	0.0807954
260734_at	At1g17600	Duplicate		2.31895	0.00238752	0.00103046	0.0210709		7.13177	0.200026	0.0280472	0.0627113		4.0921	0.959995	0.234597	0.239435		4.23675	0.870647	0.205499	0.220236
260735_at	At1g17610	Unique		2.76527	0.191499	0.0678235	0.158251		8.6569	0.0583082	0.00673547	0.0278935		3.95785	2.09415	0.529113	0.365632		5.68368	0.990622	0.174292	0.175116
260713_at	At1g17615	Duplicate		2.91308	0.00183353	0.000637233	0.0146991		3.03362	0.416021	0.137137	0.212616		3.01934	0.187341	0.0620471	0.143352		3.18921	0.0294568	0.0092364	0.0538158
260686_at	At1g17620	Unique		3.34064	0.012717	0.00387716	0.033757		8.97134	0.164903	0.0183811	0.0452644		8.38902	1.7444	0.207938	0.157439		7.45776	0.657575	0.0881732	0.108734
260736_at	At1g17630	Unique		2.90972	0.00719359	0.00248648	0.0291489		6.43741	0.062007	0.00963229	0.038682		4.25487	0.149009	0.0350209	0.0907236		5.03791	0.0493952	0.0098047	0.0441156
260733_at	At1g17640	Unique		3.47828	0.0189397	0.00557765	0.0395659		6.30688	0.122574	0.0194349	0.0555117		5.88723	0.372966	0.0633517	0.103735		5.58957	0.115957	0.0207453	0.0609215
260685_at	At1g17650	Unique		8.84937	0.41002	0.0454439	0.0723586		9.89914	0.19474	0.0196724	0.0445789		7.52678	2.84107	0.377462	0.22394		8.93368	0.300764	0.0336664	0.0613879
260688_at	At1g17665	Unique		4.18078	0.224633	0.0529061	0.113365		8.37196	0.0999971	0.0119443	0.0377717		5.01008	0.494266	0.0986544	0.140325		4.16612	3.19448	0.766775	0.42901
259397_at	At1g17680	Unique		2.97804	0.0304677	0.00989816	0.0586123		7.41316	0.111047	0.0149797	0.0449521		6.46364	0.282886	0.0437657	0.0822864		6.62346	0.115219	0.0173956	0.051248
259406_at	At1g17690	Unique		7.00721	0.104146	0.0147325	0.0460549		9.53181	0.0190072	0.00199408	0.0144638		7.5038	0.277626	0.0369981	0.0702181		8.06401	0.095449	0.0118364	0.038312
259398_at	At1g17700	Unique		4.35615	0.117837	0.0266692	0.0788019		7.80513	0.0710557	0.00910373	0.0341523		4.07404	2.85321	0.700339	0.414612		6.47643	0.602685	0.0930583	0.11987
259399_at	At1g17710	Duplicate		2.63036	0.160634	0.0593695	0.152371		5.57448	0.0645699	0.0115831	0.0455838		4.09881	3.11736	0.760552	0.43076		4.06523	0.204031	0.0501894	0.111113
259404_at	At1g17720	Duplicate		7.38765	0.060673	0.00824634	0.033342		9.3078	0.130567	0.0140276	0.0388212		8.3159	0.220227	0.0264827	0.0564321		8.79317	0.117032	0.0133094	0.0389052
259402_at	At1g17730	Duplicate		8.02373	0.0172605	0.00213813	0.0163738		10.2049	0.0113121	0.0011085	0.0104223		9.07019	0.100817	0.0111152	0.0350066		9.36081	0.0314422	0.00335892	0.0189428
259405_at	At1g17740			2.22767	0.000686704	0.00031008	0.0117634		4.67344	0.264097	0.0565102	0.109963		2.3805	0.100219	0.0421001	0.132986		2.44632	0.0722248	0.0295238	0.109857
259403_at	At1g17745	Unique		6.30254	0.843554	0.139832	0.145727		11.9921	0.115531	0.00963396	0.0283436		9.80014	3.04033	0.310233	0.177921		9.38522	2.70399	0.288111	0.17521
259400_at	At1g17750	Duplicate		2.68944	0.00116687	0.000439602	0.0127013		5.47448	0.11449	0.0209134	0.0618074		5.09878	0.589607	0.115637	0.150597		4.96841	0.500695	0.100776	0.142419
259401_at	At1g17760	Unique		4.0841	0.0722247	0.0175913	0.0658031		7.54289	0.0469627	0.00622608	0.0287302		6.87962	0.475933	0.0691801	0.100279		7.15001	0.0555914	0.007775	0.0329759
255906_at	At1g17790	Duplicate		3.33135	0.0248807	0.00735573	0.047349		7.78428	0.0172915	0.00222134	0.0168926		6.06964	0.171129	0.0281943	0.0681553		6.28861	0.0414367	0.00658917	0.0323696
255896_at	At1g17800	Unique		2.31817	0.000686995	0.000299571	0.0113066		5.30551	0.0412553	0.00777594	0.0382836		3.13323	0.201571	0.0643331	0.143292		3.604	0.0229173	0.00635885	0.0420046
255905_at	At1g17810	Duplicate		2.03238	0.000451333	0.000223014	0.0104531		3.91305	0.163456	0.041772	0.10332		3.03458	10.2943	3.39231	1.0573		2.00038	0.00480509	0.00240209	0.0346529
255900_at	At1g17830	Duplicate		2.4422	0.289157	0.111192	0.220184		6.26789	0.190547	0.0304005	0.0696434		5.20247	2.85428	0.548639	0.324742		4.84367	0.949748	0.19608	0.201201
255889_at	At1g17840	Duplicate		9.48441	0.0311295	0.00328294	0.0186027		10.7015	0.0391072	0.00365436	0.0184792		8.56435	3.4334	0.400894	0.216355		10.2237	0.22802	0.0223031	0.0467067
255890_at	At1g17850	Unique		6.35346	0.018572	0.00290297	0.0214496		7.83858	0.170503	0.0217517	0.0526778		5.81857	1.19049	0.204602	0.18752		6.7805	0.283674	0.0418368	0.0785504
255904_at	At1g17860	Unique		5.03779	0.918585	0.185464	0.190248		9.9309	0.314017	0.0316202	0.0564272		7.12143	3.79294	0.532609	0.273477		7.31559	0.570519	0.0779867	0.103249
255891_at	At1g17870	Unique		2.29381	0.000578113	0.000259939	0.0104821		7.42483	0.0723855	0.00974911	0.0362359		4.91867	0.790816	0.160778	0.180796		6.45318	4.05209	0.627922	0.311936
255902_at	At1g17880	Unique		11.6013	0.0352352	0.00304567	0.0161801		12.3685	0.00807941	0.000653227	0.00726731		11.0958	0.392366	0.0353617	0.0564531		11.1352	0.178334	0.0160154	0.0379246
255901_at	At1g17890	Duplicate		6.23581	0.0953728	0.0151825	0.0495244		9.11211	0.0575659	0.00631751	0.0263308		7.84469	0.240098	0.0306064	0.0624623		7.85688	0.0906588	0.0115388	0.0383226
255897_at	At1g17900			4.47753	0.0350009	0.00800624	0.0417831		1.64417	0.361165	0.219665	0.365517		4.7112	0.41948	0.089039	0.137475		4.8265	0.0763095	0.0158105	0.0572343
255892_at	At1g17910	Duplicate		2.74936	0.00158923	0.000585189	0.0144998		3.90579	0.29571	0.0757107	0.139227		3.26353	0.107624	0.0329779	0.100524		3.83709	0.0260833	0.00679769	0.0420901
255907_at	At1g17920	Duplicate		2.54364	0.00203256	0.000820143	0.0177241		6.5075	0.0247662	0.0038058	0.0241833		3.79242	1.02957	0.27148	0.267553		3.45255	0.112103	0.0324696	0.096977
255898_at	At1g17930	Duplicate		5.72346	0.0203743	0.00355734	0.0249392		8.15279	0.0224504	0.00275371	0.0183783		6.84457	0.14705	0.0214842	0.0560255		7.27535	0.0395563	0.00543703	0.0273372
255903_at	At1g17950	Duplicate		1.97901	0.000389018	0.000197613	0.00996639		2.90119	0.254434	0.0876998	0.173865		3.28725	2.47701	0.753521	0.478775		2.91727	0.0142072	0.00487004	0.0408581
255893_at	At1g17960	Unique		2.63166	0.00345435	0.00131627	0.0223333		4.64525	0.319425	0.0687639	0.121668		4.144	0.438668	0.105856	0.159826		4.66793	0.154657	0.0331318	0.0842482
255899_at	At1g17970	Duplicate		4.31382	0.0360983	0.00884369	0.0440435		8.0776	0.019481	0.00241173	0.0172792		5.46104	1.53899	0.281813	0.227166		6.83192	0.437659	0.0640609	0.0968334
255894_at	At1g17980	Unique		5.78185	0.0393989	0.0068307	0.0343301		8.59245	0.0409731	0.0047685	0.0235577		7.55665	0.189577	0.0250875	0.0576188		7.82099	0.144924	0.0185301	0.0486752
255895_at	At1g17990	Duplicate		6.3218	2.24655	0.35955	0.237092		9.95971	0.32499	0.0326304	0.0572385		8.35546	4.21664	0.504657	0.245761		10.3639	1.06301	0.102568	0.0994817
255908_s_at	At1g18010	Tandem Duplicate		5.66586	1.27046	0.228711	0.198937		9.26492	0.0311423	0.00336131	0.0190473		7.24419	0.968024	0.133628	0.135817		8.35249	0.699905	0.0837959	0.100162
255910_at	At1g18030	Unique		5.44933	0.0401769	0.0074992	0.0367828		7.89021	0.0639415	0.00810391	0.0320481		6.72988	0.311171	0.0462373	0.0828882		7.68259	0.15499	0.0201742	0.0512442
255909_at	At1g18040	Duplicate		5.2087	0.0445308	0.0086175	0.0405136		7.65094	0.00662945	0.000866487	0.010642		6.11675	0.648207	0.105972	0.131624		6.60612	0.0880013	0.0133212	0.0449053
256126_at	At1g18050	Unique		1.97693	0.000245823	0.000125713	0.00793085		2.66669	0.0769591	0.0288594	0.10403		2.41004	0.118081	0.0489955	0.142582		2.45937	0.0238706	0.00970596	0.0628213
256076_at	At1g18060	Unique		10.3587	0.0655079	0.00634917	0.0247083		11.2351	0.0295001	0.00262571	0.0152874		9.41713	2.29843	0.244069	0.160989		12.0652	0.170653	0.0141442	0.0342391
256119_at	At1g18070	Unique		9.35728	0.0235141	0.00252234	0.0163876		10.2952	0.0546091	0.0053043	0.0226984		9.65307	0.072506	0.00751119	0.0278947		10.2307	0.0991645	0.0096928	0.0307802
256072_at	At1g18080	Duplicate		12.6206	0.0186957	0.0014863	0.010834		13.0788	0.00194865	0.000148993	0.00337519		12.3261	0.650149	0.0527459	0.0654157		12.5162	0.111176	0.00888258	0.0266399
256077_at	At1g18090	Unique		5.89991	0.0322432	0.00542537	0.030435		7.38935	0.0740852	0.0100259	0.0368349		5.75145	0.904649	0.15729	0.165372		6.76136	0.295495	0.0437035	0.0803973
256073_at	At1g18100	Duplicate		2.00707	0.000459184	0.000229732	0.0106766		5.73941	0.0332232	0.0057886	0.031758		3.50757	8.1064	2.31112	0.811723		2.31922	0.187509	0.0808501	0.186711
256120_at	At1g18130	Unique		2.43098	0.000411606	0.00017042	0.00834562		5.50467	0.0635478	0.0115443	0.0457951		2.43614	0.0584131	0.0239777	0.0992093		2.51731	0.0159153	0.00632233	0.0501152
256128_at	At1g18140	Duplicate		2.70398	0.00146633	0.000550038	0.0141616		5.39732	0.0298359	0.00552792	0.0320031		3.92095	1.77905	0.453729	0.340175		3.2336	0.0455059	0.0140728	0.0659701
256075_at	At1g18150	Unique		7.09405	0.0414628	0.00571645	0.0287035		9.87083	0.0247056	0.00250289	0.0159237		8.12311	0.742205	0.0913695	0.106057		8.45219	0.195085	0.023081	0.0522567
256121_at	At1g18160	Duplicate		6.36033	0.0222085	0.00340403	0.0234304		9.47966	0.031433	0.00331584	0.0187025		8.18399	0.346481	0.0423364	0.0719241		8.41764	0.0633156	0.00752178	0.0298927
256130_at	At1g18170	Duplicate		8.57299	0.0118748	0.00137228	0.012711		9.49318	0.0187554	0.00197567	0.0144262		6.85195	2.74817	0.401079	0.24194		9.45858	0.15194	0.0160637	0.0412107
256122_at	At1g18180	Duplicate		3.36225	1.52946	0.450509	0.367823		7.50492	0.527277	0.0702575	0.096755		6.48079	1.32335	0.204196	0.177505		6.02062	0.0945741	0.0157084	0.0510793
256123_at	At1g18190	Unique		4.33811	0.0157032	0.00358382	0.0288864		7.22698	0.0225251	0.0031168	0.0207671		6.82009	0.415761	0.0609612	0.0945435		7.1144	0.0429502	0.00603708	0.0291303
256127_at	At1g18200	Unique		2.00768	0.000239521	0.000119697	0.00770862		6.02507	0.0478576	0.00794307	0.0363089		2.18842	0.213298	0.0974669	0.211039		2.31066	0.0137591	0.00595461	0.0507644
256129_at	At1g18210	Duplicate		8.15185	0.0811136	0.009857	0.0349374		11.542	0.0173902	0.00150669	0.0114254		10.457	0.899719	0.0860398	0.0907081		9.4319	0.762735	0.0808676	0.092595
256124_at	At1g18220	Unique		3.41814	0.00864112	0.00256866	0.0271953		3.01819	0.165326	0.0547766	0.134718		4.16729	0.206694	0.0495992	0.109096		4.26289	0.0681135	0.0159782	0.0612227
256125_at	At1g18250	Duplicate		8.1155	0.15351	0.0185103	0.0482784		9.365	0.18065	0.0192899	0.0453849		7.8017	6.85011	0.878028	0.335475		8.29243	1.06062	0.127902	0.124193
256074_at	At1g18260	Duplicate		6.33947	0.0331031	0.00519504	0.0287		9.9647	0.0280636	0.0028163	0.0168115		8.49865	0.189381	0.0222837	0.0512057		8.98785	0.13474	0.0149913	0.0408406
261674_at	At1g18270	Unique		6.2811	0.0368329	0.00587551	0.030555		8.7125	0.0983719	0.0112909	0.0359992		7.84083	0.849382	0.108328	0.117541		8.03304	0.239003	0.0297525	0.0608586
261673_at	At1g18280	Unique		1.99231	0.000479522	0.000240783	0.0109913		5.86909	0.0771232	0.0131406	0.0473175		3.81126	4.92491	1.2922	0.582279		2.42887	0.012706	0.00523125	0.0464088
261675_at	At1g18290	Unique		1.97122	0.00128819	0.000661082	0.0182077		5.18322	0.151618	0.0292516	0.0751233		2.86691	0.455209	0.15878	0.235338		2.69873	0.0124117	0.00459909	0.0412816
261665_at	At1g18310	Unique		2.95279	0.00137663	0.000470268	0.0125654		2.4202	0.137215	0.0566955	0.153055		2.91923	0.103695	0.0355215	0.110309		3.45203	0.0381101	0.0110399	0.0565516
261664_s_at	At1g18320	Unique		7.20743	0.0916936	0.0127977	0.0420135		8.64018	0.0464099	0.00537141	0.0249335		7.47056	0.648721	0.0868369	0.107814		7.73052	0.401823	0.0519788	0.0819991
261663_at	At1g18330	Duplicate		6.92777	0.819203	0.111325	0.130648		8.95039	0.077872	0.0087004	0.031178		7.30149	1.44965	0.198542	0.1649		9.04768	1.71131	0.189143	0.144586
261671_at	At1g18340	Unique		5.9756	0.0547143	0.00902088	0.0391443		9.12326	0.00415009	0.00045489	0.0070612		6.28529	0.543449	0.0864636	0.117288		7.25275	0.0724101	0.00998381	0.037102
261662_at	At1g18350	Duplicate		2.35208	0.000708369	0.000303582	0.0113156		6.01364	0.156813	0.0260763	0.0658497		3.47561	0.050862	0.014634	0.0648881		3.08509	0.0132561	0.00429684	0.0373199
261661_at	At1g18360	Unique		6.97969	0.053776	0.00765804	0.0332245		10.4429	0.0469949	0.00450019	0.020759		7.57408	1.15366	0.152317	0.141811		9.12871	0.357281	0.0391382	0.065478
261660_at	At1g18370	Duplicate		6.52075	0.219052	0.0331613	0.0717755		6.79975	0.0463151	0.0068113	0.0316496		6.91846	3.55879	0.51439	0.272673		7.37165	0.657457	0.0891872	0.109994
261719_at	At1g18380	Unique		2.32288	0.000731517	0.000317281	0.0116436		7.94499	0.0723221	0.00910285	0.0338487		4.1439	1.94896	0.470321	0.336894		5.1269	0.614832	0.119923	0.152941
261718_at	At1g18390	Unique		2.23637	0.00033562	0.000151902	0.00819183		9.31055	0.0706042	0.00758324	0.0285391		5.2565	4.33304	0.82432	0.396004		5.80285	1.46337	0.252181	0.208466
261717_at	At1g18400	Duplicate		3.64992	0.165852	0.0432138	0.111578		7.80933	0.0332596	0.00425895	0.0233531		5.09633	2.27854	0.447093	0.29619		6.16704	0.955132	0.154877	0.158473
261716_at	At1g18410	Unique		2.44265	0.000855265	0.000352982	0.0119726		1.84856	0.0191186	0.0103424	0.0747989		2.85103	1.3825	0.484913	0.412412		3.04938	0.018707	0.00613468	0.0448529
261666_at	At1g18440	Unique		8.43975	0.0211259	0.00251496	0.0172218		8.76986	0.0710803	0.00810506	0.0304006		8.01239	0.276243	0.034477	0.0655969		8.47905	0.0709271	0.00836498	0.0314094
261672_at	At1g18450	Unique		7.41706	0.0367725	0.00498956	0.0258541		9.85052	0.0389793	0.00395708	0.0200428		8.57968	0.370162	0.043144	0.0709128		8.88506	0.0269402	0.00303208	0.0184731
261667_at	At1g18460	Duplicate		7.74801	0.220511	0.0288504	0.0606073		8.67702	0.0372705	0.00429532	0.0222491		8.66721	0.41387	0.0477512	0.0742254		10.0535	0.484376	0.0481797	0.0692266
261677_at	At1g18470	Duplicate		5.89274	0.0157395	0.00266811	0.0212901		10.2783	0.00776231	0.000755213	0.00857183		8.39915	0.919288	0.10945	0.114154		8.88819	0.137178	0.0154337	0.0416705
261676_at	At1g18480	Unique		6.59203	0.0148604	0.00225282	0.0184925		9.20208	0.00165001	0.000179308	0.00441425		7.6782	0.240412	0.031311	0.0638585		7.84685	0.219598	0.0279856	0.0597199
261715_at	At1g18485	Unique		6.35111	0.0418958	0.00671209	0.0322281		7.23547	0.0576368	0.00796588	0.0331805		6.28568	0.97641	0.155339	0.157204		7.64123	0.27304	0.0357325	0.0683834
261669_at	At1g18490	Unique		7.15697	0.00675873	0.000945187	0.0114869		9.5285	0.0168949	0.00177309	0.0136412		7.73632	0.203481	0.0263021	0.058308		8.42661	0.0849251	0.0100782	0.0345832
261668_at	At1g18500	Duplicate		9.25	0.00742865	0.000799672	0.00931779		9.91921	0.0696475	0.00702147	0.0266058		9.09451	0.561138	0.0617007	0.0823674		10.0498	0.160424	0.0159629	0.0398545
261714_at	At1g18510	Unique		2.48857	0.00161851	0.000657087	0.0161662		3.41685	0.0902533	0.0264142	0.0879237		2.80425	0.10781	0.0384452	0.117088		3.19767	0.0552248	0.0172703	0.0734909
261670_at	At1g18520	Unique		1.96122	0.000461218	0.000235921	0.0109503		5.71515	0.100002	0.0174978	0.0553322		2.63776	3.18976	1.20927	0.677086		2.92128	0.0119633	0.00409522	0.0374414
255772_at	At1g18530	Duplicate		2.6958	0.00185594	0.000693317	0.0159807		2.44866	0.230013	0.0939343	0.195861		3.26372	1.14786	0.351703	0.32827		3.19027	0.0188038	0.00589412	0.0429829
255776_at	At1g18540	Duplicate		12.2299	0.0200835	0.00164546	0.0115877		12.8096	0.0179164	0.00139867	0.0104494		11.8501	0.733745	0.061919	0.0722855		11.5799	0.211362	0.0182526	0.0397018
255771_at	At1g18550	Unique		2.81259	0.00858476	0.00306154	0.0329426		4.27192	0.553049	0.129461	0.174084		3.74346	0.0937069	0.0250322	0.0817735		3.93724	0.0220631	0.00560369	0.037726
255770_at	At1g18560	Unique		3.48806	0.00542203	0.00157308	0.0211104		6.65016	0.020281	0.0030497	0.0214147		5.18212	0.193355	0.037312	0.0848536		5.83545	0.0906928	0.0155417	0.0516074
255753_at	At1g18570	Duplicate		2.2441	0.00922913	0.00411221	0.0428093		8.94075	0.188943	0.0211328	0.0486174		5.34382	5.47733	1.02499	0.437959		6.48443	2.84444	0.438657	0.260092
255780_at	At1g18580	Unique		4.90072	0.0206497	0.00422567	0.0293222		8.29233	0.0415335	0.00500866	0.0245767		6.02091	0.188551	0.031316	0.0721194		6.47247	0.134353	0.0207576	0.0566309
255773_at	At1g18590	Duplicate		7.85338	0.888656	0.107882	0.120036		10.7568	0.232199	0.0215863	0.044797		7.88368	3.44289	0.436711	0.23536		9.13631	0.84061	0.0920076	0.100352
255775_at	At1g18600	Unique		6.28537	0.0737906	0.0116313	0.0432185		9.23416	0.0118218	0.00128022	0.0117746		7.34435	0.703384	0.0957721	0.114194		7.98919	0.0554138	0.0069361	0.029465
255769_at	At1g18610	Duplicate		3.8312	0.0102904	0.00271296	0.0264777		6.5269	0.00897772	0.0013755	0.014517		5.63099	0.316297	0.0561707	0.0998763		5.87094	0.110374	0.0188	0.0565881
255774_at	At1g18620	Duplicate		7.88839	0.0662793	0.00835513	0.0326363		8.45922	0.0775622	0.00916896	0.0329227		8.14925	1.95089	0.239395	0.171395		10.2238	0.954923	0.093402	0.0955811
255777_at	At1g18630	Unique		7.2275	0.0374341	0.00510861	0.0267698		9.23719	0.0495812	0.00536757	0.0241056		7.49796	0.317095	0.0422908	0.075102		6.46179	0.129716	0.0200744	0.0557371
255778_at	At1g18640	Unique		7.17869	0.0155096	0.00211976	0.0173482		9.2187	0.0166404	0.00180507	0.013993		7.58421	0.868829	0.114558	0.122901		8.24279	0.21783	0.0264267	0.0566219
255779_at	At1g18650	Unique		8.23603	0.0339856	0.0041114	0.0223836		9.11246	0.0867819	0.00952343	0.032328		7.8233	3.1382	0.401135	0.226438		8.7491	0.624246	0.0713497	0.0903055
261376_at	At1g18660	Unique		7.70499	0.03915	0.00506609	0.0256799		8.85995	0.110691	0.0124934	0.0375512		8.29733	0.35418	0.042686	0.0717255		9.48943	0.0797039	0.00839923	0.0297509
261427_at	At1g18670	Unique		5.28443	0.0385064	0.00742848	0.0371337		7.11871	0.018166	0.00255187	0.0189334		6.52421	0.346669	0.0531358	0.0902464		7.35571	0.13751	0.0186944	0.0504131
261426_at	At1g18680	Unique		3.20945	0.028544	0.00900617	0.0526413		7.69727	0.0646296	0.00839643	0.0330277		5.68574	0.203567	0.0358031	0.0793537		6.06852	0.425499	0.0701158	0.10749
261404_at	At1g18690	Unique		2.72212	0.0236313	0.00859122	0.0564725		6.18551	0.01558	0.00251879	0.0201794		5.03189	0.177433	0.0352617	0.0837116		6.02832	0.0877819	0.0145616	0.049148
261424_at	At1g18700	Unique		7.33169	0.0133895	0.00183938	0.0157826		9.56082	0.00834638	0.000872977	0.00955551		8.60289	0.0839891	0.00976289	0.0336874		8.71683	0.0327591	0.00375815	0.0207638
261431_at	At1g18710	Unique		6.9099	2.99029	0.475253	0.250256		8.87559	0.357219	0.0402473	0.0673395		4.13183	2.25928	0.546798	0.363783		4.83671	2.91537	0.60276	0.353018
261379_at	At1g18720	Duplicate		9.1825	0.101936	0.0110655	0.0347699		12.3468	0.0259558	0.00210222	0.0130485		10.5963	0.480766	0.0453713	0.0654356		10.3699	0.223938	0.0215949	0.0456339
261422_at	At1g18730	Unique		11.0986	0.021713	0.00194545	0.0132767		11.3501	0.0144892	0.00127658	0.0106053		9.4286	5.78021	0.613051	0.254991		12.1532	0.0904075	0.00743896	0.0247406
261405_at	At1g18740	Duplicate		6.99028	0.197206	0.0282599	0.063528		9.79217	0.04737	0.00483754	0.0222266		8.77255	1.43798	0.163918	0.136694		8.79043	1.08721	0.123681	0.118617
261423_at	At1g18750	Unique		3.1068	0.0413703	0.0132388	0.0654684		7.22436	0.0195444	0.00270534	0.0193513		4.84487	0.857678	0.177028	0.191152		5.45029	0.121927	0.0223707	0.0640664
261406_at	At1g18800	Unique		7.65003	0.034523	0.00454515	0.024288		9.54571	0.0899798	0.0094262	0.0314242		7.68926	0.38862	0.0505407	0.0810734		8.04008	0.188907	0.0234956	0.0540584
261407_at	At1g18810	Unique		7.45	0.211654	0.029032	0.0617529		7.73227	0.0484495	0.00626589	0.0284667		6.22645	2.60009	0.417588	0.258973		8.13724	0.563408	0.0692383	0.0922433
261430_at	At1g18830	Duplicate		2.44122	0.0108215	0.00447162	0.0426125		5.55401	0.129508	0.023318	0.0647951		3.13102	0.124715	0.0398321	0.112791		3.09644	0.0485014	0.0156636	0.0711236
261421_at	At1g18840	Duplicate		6.56221	0.0744106	0.0111675	0.0415688		8.2548	0.199223	0.0241343	0.0540709		7.88736	1.28206	0.162546	0.143556		7.54912	0.175946	0.0233068	0.055564
261377_at	At1g18850	Unique		7.25681	0.0356444	0.00489526	0.0260166		9.73415	0.00518872	0.000533043	0.00740001		7.24157	0.915874	0.126474	0.132155		7.95831	0.509502	0.0640213	0.0896916
261429_at	At1g18860	Unique		2.50686	0.000946103	0.000380573	0.0122699		5.78813	0.0589588	0.0101861	0.0419504		3.12599	1.14037	0.364802	0.341613		3.18587	0.0629396	0.0197559	0.0787471
261428_at	At1g18870	Duplicate		2.84044	0.247616	0.0840232	0.175188		7.79708	0.239391	0.0307026	0.0627512		5.307	1.8289	0.344621	0.254828		5.34401	2.65628	0.497057	0.304979
261425_at	At1g18880	Duplicate		4.55218	0.027984	0.00621184	0.0367482		7.78458	0.131068	0.0168369	0.0465065		6.84542	4.5248	0.660997	0.310742		7.56162	0.198754	0.0262845	0.058958
261378_at	At1g18890	Duplicate		5.47249	0.0172501	0.00323444	0.024		8.99272	0.0491075	0.0054608	0.0246424		8.05906	0.673908	0.0836212	0.101863		8.93427	0.328029	0.0367158	0.0641058
259461_at	At1g18900	Duplicate		5.41673	0.0666931	0.0124999	0.0476764		8.59273	0.0955434	0.0111191	0.0359724		7.14626	0.182918	0.0255963	0.0598479		7.41126	0.44322	0.0598035	0.0898292
259472_at	At1g18910	Unique		2.43911	0.00683519	0.00279542	0.0338957		6.94887	0.408003	0.058715	0.0919216		4.48367	1.7087	0.381094	0.291541		4.46357	0.210654	0.047194	0.102826
259462_at	At1g18940	Duplicate		2.59033	0.000427853	0.000167232	0.00798532		5.52249	0.353933	0.0640894	0.107727		4.68325	2.25646	0.481815	0.32075		4.46261	0.109999	0.024649	0.0743199
259463_at	At1g18950	Unique		5.19458	0.0176234	0.00344634	0.0255561		6.66593	0.128572	0.0192879	0.0537913		6.58838	0.17939	0.0272283	0.0642866		7.55805	0.0452794	0.00599088	0.028154
259481_at	At1g18970	Tandem Duplicate		2.22773	0.0218046	0.0098097	0.0662843		5.86535	0.0796589	0.0135813	0.0481198		3.41285	3.32745	0.974976	0.534489		3.651	0.283798	0.0777314	0.145912
259478_at	At1g18980	Tandem Duplicate		2.11129	0.067679	0.0322149	0.12322		4.57655	0.484274	0.105816	0.152057		3.67783	6.48338	1.76283	0.692324		3.43452	0.270657	0.0788048	0.151476
259464_at	At1g18990	Duplicate		3.24135	0.00617956	0.00193561	0.0242523		2.79185	0.5649	0.202339	0.269211		4.42696	3.28593	0.742255	0.409471		4.21606	0.116501	0.0276327	0.0809577
259476_at	At1g19000	Duplicate		9.26815	0.0208469	0.00226013	0.0155786		11.0967	0.0276917	0.00249549	0.0149962		9.45765	0.811641	0.0858185	0.0952575		11.5592	0.273719	0.0236798	0.0452611
259480_at	At1g19010	Unique		5.4935	0.0193435	0.0035306	0.0253174		7.95447	0.00947558	0.00119123	0.0122375		6.41658	0.330373	0.0514873	0.0895774		6.49504	0.137599	0.0211853	0.0571118
259479_at	At1g19020	Unique		4.2679	0.105555	0.0257876	0.0761246		11.3276	0.118009	0.0104178	0.0303263		8.28159	6.69611	0.808554	0.312462		8.62707	4.09712	0.474914	0.234626
259473_at	At1g19025	Unique		3.04666	0.00446478	0.00146451	0.0219319		7.12945	0.0212264	0.00297728	0.0204353		4.93104	0.114444	0.0232089	0.0686054		5.17627	0.0547437	0.0105759	0.0452012
259465_at	At1g19030	Unique		2.15888	0.000499601	0.000232783	0.0103534		4.53672	0.0824847	0.0181816	0.063306		2.36476	0.0452765	0.0191463	0.0899806		2.49524	0.0246351	0.00987286	0.0629022
259471_at	At1g19040	Unique		2.45881	0.00081392	0.000332986	0.0116029		4.46043	0.0892363	0.0200062	0.0669721		2.48211	0.11365	0.0457877	0.13582		2.82143	0.0204266	0.0072398	0.0506557
259466_at	At1g19050	Unique		7.79848	0.0629943	0.00826684	0.0321841		10.1716	0.0414125	0.00407138	0.0200067		8.9434	2.78006	0.31085	0.186434		9.08065	2.49245	0.274479	0.173859
259467_at	At1g19060	Unique		2.31934	0.000552612	0.000239618	0.0101355		5.13179	0.0510303	0.00994396	0.0440195		2.14628	0.0229545	0.010695	0.0705908		2.22261	0.0042278	0.00190218	0.0292546
259468_at	At1g19080	Unique		6.04377	0.347204	0.0567717	0.0974954		9.03077	0.0082266	0.000910953	0.0100435		7.95716	0.15507	0.0194881	0.0494887		7.96351	0.0423679	0.00532025	0.0258472
259482_at	At1g19090	Unique		2.20833	0.000451078	0.000205733	0.00961749		4.70903	0.0118462	0.00251563	0.0231131		2.54525	1.35257	0.531409	0.456929		2.44438	0.0186716	0.00763859	0.0559014
259469_at	At1g19100	Unique		3.78731	0.0142528	0.00369888	0.0315224		7.1394	0.0117407	0.0016445	0.015177		5.89235	0.561517	0.0952959	0.127172		6.66782	0.0973459	0.0145994	0.0467924
259470_at	At1g19110	Unique		8.65731	0.0212394	0.0024856	0.016834		10.2525	0.0241834	0.00235878	0.015168		9.75834	0.285558	0.029263	0.054761		10.3943	0.0706662	0.00679858	0.0255748
259477_at	At1g19120	Duplicate		7.91983	0.00902417	0.00114604	0.0119947		10.4704	0.00422269	0.000403296	0.00620625		8.951	0.230936	0.0258001	0.0536877		9.36757	0.0502445	0.00536366	0.0239286
259474_at	At1g19130	Unique		6.91751	0.0631773	0.00915401	0.0363354		10.4498	0.00979583	0.000937421	0.0094714		8.6205	0.418197	0.0485119	0.0750167		8.83294	0.186203	0.0210805	0.0488527
259475_at	At1g19140	Unique		7.51869	0.0422631	0.00563038	0.0273425		9.02773	0.0114328	0.00126641	0.011844		8.02305	0.359972	0.0448672	0.0747816		8.31527	0.293715	0.0353224	0.0651759
256015_at	At1g19150	Unique		11.5973	0.0282454	0.00243286	0.0144916		12.3494	0.0150011	0.00121472	0.00991778		8.59545	11.1378	1.29577	0.388267		11.4454	0.494089	0.0431693	0.0614147
256037_at	At1g19160	Unique		2.64365	0.00128235	0.000488112	0.0135457		5.74961	0.0396297	0.00689259	0.0346236		3.68297	0.0386623	0.0104976	0.0533883		3.80412	0.0421622	0.0110833	0.0539768
256038_at	At1g19170	Duplicate		5.74284	0.0107671	0.00188317	0.0180686		8.24859	0.0294785	0.00357376	0.0208148		6.85374	0.437461	0.0638281	0.0965033		6.95807	0.0277108	0.00398255	0.0239241
256017_at	At1g19180	Duplicate		4.10385	1.27747	0.317773	0.275412		10.6331	0.127369	0.0119785	0.0335638		9.50568	3.16765	0.333237	0.187234		7.74071	4.42674	0.571878	0.271807
256039_at	At1g19190	Duplicate		2.34691	0.000739353	0.00031719	0.0115859		3.80413	0.153206	0.0402735	0.102892		3.56623	2.53914	0.711996	0.446822		3.16417	0.0239612	0.00757268	0.048921
256014_at	At1g19200	Unique		2.14267	0.00396316	0.00186179	0.0293809		6.44471	1.18958	0.184582	0.169236		4.19312	2.42973	0.579457	0.371742		4.281	1.00482	0.234717	0.234153
256009_at	At1g19210	Duplicate		2.46007	0.0556738	0.0223235	0.0959133		6.27127	0.0499409	0.00796343	0.0356346		4.5559	1.79166	0.393262	0.293802		3.95724	0.352676	0.0891218	0.150071
256010_at	At1g19220	Unique		3.23949	0.0214583	0.00649458	0.0452189		7.30809	0.0357332	0.00488955	0.0258662		5.96512	0.497016	0.0833203	0.118186		6.53686	0.229829	0.0351589	0.0733386
256011_at	At1g19230	Duplicate		2.0748	0.000489869	0.000238751	0.0106675		5.27762	0.0625061	0.0118436	0.0473721		3.83079	3.90032	1.01815	0.515539		3.51769	0.743691	0.211414	0.245154
256016_at	At1g19240	Unique		6.39981	0.0431255	0.00663907	0.0324489		9.81109	0.032926	0.003356	0.0184949		8.26365	0.296762	0.0359117	0.0659223		8.26219	0.0911617	0.0110336	0.0365436
256012_at	At1g19250	Duplicate		2.41737	0.00152949	0.00063916	0.0161782		8.13722	0.507737	0.0623969	0.0875676		3.64115	1.7591	0.483117	0.364256		3.55203	2.26002	0.63626	0.423232
256013_at	At1g19270	Unique		3.41196	0.00887074	0.00259538	0.0276042		9.14516	0.0262644	0.00287195	0.0177212		6.60031	0.297684	0.0451016	0.0826636		7.04302	0.244621	0.0347324	0.0702243
260654_at	At1g19290	Unique		3.02514	0.0329099	0.0105974	0.0599677		6.20645	0.0766104	0.0123437	0.0445965		4.94283	0.294884	0.0596589	0.109863		5.52331	0.104931	0.0189978	0.0586478
260666_at	At1g19300	Duplicate		4.34979	0.155835	0.0351482	0.0907538		8.66669	0.227253	0.0262215	0.055005		6.57765	2.56497	0.389952	0.243484		6.48495	0.450099	0.0694066	0.103454
260671_at	At1g19310	Unique		4.22489	0.0283613	0.00663489	0.0398609		10.0875	0.0435224	0.00431451	0.0206812		8.06332	0.555327	0.0688707	0.0924188		6.6103	0.930936	0.140831	0.145962
260655_at	At1g19320	Duplicate		2.08739	0.000475622	0.000230288	0.0104479		5.94933	0.202657	0.0340638	0.075668		3.19505	1.59077	0.497887	0.394754		3.10396	0.0530426	0.0170887	0.0741986
260673_at	At1g19330	Duplicate		6.55009	0.12285	0.0186002	0.0535107		9.9027	0.00577438	0.000583112	0.0076736		8.3877	1.23595	0.147353	0.132543		8.23671	0.27886	0.0338557	0.064112
260669_at	At1g19340	Unique		2.14579	0.015108	0.00695123	0.0572819		6.84929	0.238239	0.034783	0.0712625		4.14842	0.3693	0.0890217	0.146489		5.54887	0.20416	0.036793	0.0814293
260665_at	At1g19360	Duplicate		6.82401	0.0416273	0.00605668	0.0298985		10.5012	0.0336578	0.00320514	0.0174705		8.49293	0.770005	0.0906643	0.103321		8.56253	0.093664	0.0109388	0.0357424
260674_at	At1g19370	Duplicate		3.83408	0.064636	0.0165724	0.0663096		8.76964	0.0454408	0.00518161	0.0243076		5.98657	0.165064	0.0275724	0.0678654		5.72112	2.76951	0.484085	0.290884
260656_at	At1g19380	Unique		5.03136	0.161922	0.032805	0.0799774		10.0314	0.131959	0.0131546	0.0362124		8.56521	3.52781	0.411876	0.219288		8.22878	3.79157	0.46077	0.236632
260657_at	At1g19390	Duplicate		2.52923	0.00122348	0.000487851	0.0138296		4.13196	0.0522423	0.0126435	0.0553165		2.63851	0.0811425	0.0307532	0.107961		2.91525	0.0223462	0.00766529	0.0512774
260658_at	At1g19410	Unique		2.60407	0.00151959	0.000588016	0.0149697		5.60895	0.136513	0.0243384	0.0658727		3.55764	0.120334	0.0338241	0.0975061		3.81467	0.408098	0.106981	0.167466
260675_at	At1g19430	Unique		6.32815	0.0590182	0.00936571	0.0383898		9.14435	0.0621699	0.00679872	0.027267		7.77957	0.20151	0.0259025	0.0577023		7.84675	0.0785039	0.0100046	0.0357072
260667_at	At1g19440	Duplicate		7.60498	0.0657578	0.00878251	0.033719		9.16844	0.0162787	0.00177551	0.013916		8.09541	0.95084	0.117454	0.120452		8.34966	0.216952	0.0259833	0.0557844
260676_at	At1g19450	Duplicate		10.1593	0.16765	0.0167904	0.0403031		10.5898	0.130324	0.0123066	0.0340899		9.90953	1.13823	0.114862	0.107662		10.972	1.14735	0.104571	0.0976257
260659_s_at	At1g19470	Tandem Duplicate		3.33399	0.00638359	0.00194436	0.0239645		2.68534	0.347424	0.129378	0.219498		3.91571	0.295432	0.0754479	0.138809		4.43157	0.0313296	0.00706963	0.0399411
260672_at	At1g19480	Duplicate		4.38227	0.0129151	0.00296998	0.0259328		7.83218	0.0134568	0.00171814	0.0148111		6.26313	0.0789565	0.0126066	0.0448645		6.7015	0.0661507	0.00987103	0.0383792
260660_at	At1g19485	Unique		4.31659	0.245333	0.0554135	0.114746		7.16282	0.102133	0.0142588	0.044617		6.76556	0.165012	0.0243899	0.0600417		7.46725	0.0625798	0.00838056	0.0335009
260661_at	At1g19500	Unique		2.24455	0.000770501	0.000346108	0.0123668		2.79975	0.171946	0.0614149	0.148108		4.95677	5.16335	1.04168	0.458424		4.63433	0.0448826	0.00968481	0.0457143
260664_at	At1g19510	Unique		3.12535	0.0108895	0.00347201	0.0333892		6.21409	0.136019	0.0218887	0.0593501		5.0529	1.70865	0.338153	0.258694		6.38544	0.792682	0.124139	0.139431
260670_at	At1g19520	Unique		7.35077	0.0219746	0.00300759	0.0201664		7.90635	0.0939118	0.011878	0.03876		6.85488	0.871913	0.127196	0.136219		7.93069	0.0801297	0.0101038	0.0356932
260663_at	At1g19525	Unique		7.26928	0.0152372	0.0020942	0.0169809		8.94396	0.047579	0.00531968	0.0243881		7.81715	0.612851	0.0783982	0.100145		8.59536	0.103246	0.0120118	0.0373829
260668_at	At1g19530	Unique		2.63452	0.113959	0.042451	0.128137		7.05952	0.367179	0.052012	0.0858349		4.57891	6.06272	1.32405	0.53774		4.08877	0.560492	0.137081	0.183101
260662_at	At1g19540	Duplicate		2.82682	0.0603079	0.021649	0.0868738		7.3834	0.42514	0.0575806	0.08831		5.68011	4.207	0.740655	0.361102		4.3327	0.307785	0.0710378	0.128046
261149_s_at	At1g19570	Duplicate		10.5693	0.228711	0.0219834	0.0452478		13.5075	0.0379364	0.00280854	0.0144196		12.9111	1.01087	0.0782942	0.0778722		12.7421	0.666669	0.0523202	0.0640788
261148_at	At1g19580	Duplicate		6.98566	0.00831276	0.00118054	0.0130516		9.5683	0.0639317	0.00668162	0.0264255		7.87525	0.206126	0.0261739	0.0576504		8.1768	0.0648993	0.00793701	0.0311557
261136_at	At1g19600	Unique		7.59259	0.0331359	0.00444094	0.0239751		9.59773	0.0289166	0.00301286	0.0177176		7.91984	0.683995	0.0863647	0.104426		8.40347	0.0497454	0.00591962	0.026541
261135_at	At1g19610	Unique		2.80564	0.295923	0.102254	0.193891		7.45965	0.274689	0.0368233	0.070259		5.0281	2.15325	0.428243	0.291839		6.12321	1.83637	0.299904	0.22131
261146_at	At1g19620	Unique		1.86752	0.0226978	0.0120304	0.0806729		6.60238	0.0668999	0.0101327	0.0391753		2.57289	0.201559	0.0783395	0.174494		3.38517	0.0991334	0.0292846	0.09301
261134_at	At1g19630	Unique		2.42063	0.00692356	0.00287823	0.0343745		5.70475	0.294144	0.0515613	0.09507		3.75434	0.384414	0.102392	0.165145		4.61716	0.3229	0.0699348	0.123072
261150_at	At1g19640	Unique		2.08218	0.000654072	0.000314625	0.0122827		6.87665	0.654959	0.0952439	0.117687		5.30195	7.08629	1.33654	0.502081		4.38135	2.19435	0.500839	0.3381
261151_at	At1g19650	Duplicate		5.86753	0.0890963	0.0150064	0.0508715		8.20929	0.0510311	0.00621626	0.0275177		6.43627	1.24996	0.194205	0.173705		8.23129	0.203925	0.0247743	0.0548614
261144_s_at	At1g19660	Duplicate		10.7556	0.0893652	0.0081389	0.027794		12.9527	0.0152899	0.00118044	0.00954642		12.3859	1.10117	0.088905	0.0847227		13.8676	0.408305	0.0294431	0.0460777
255786_at	At1g19670	Unique		8.50584	0.137687	0.0164065	0.0436244		12.3493	0.115857	0.00938173	0.0275627		8.2976	7.79186	0.93905	0.336409		9.95342	1.87621	0.188499	0.137616
261140_at	At1g19680	Duplicate		5.99412	0.00626101	0.00105172	0.0132007		8.51321	0.0363517	0.00427004	0.0223959		7.99983	0.310313	0.0387899	0.0696336		8.2812	0.093432	0.0112824	0.0369109
261147_at	At1g19690	Unique		5.29142	0.150215	0.0281581	0.0732462		7.94467	0.0997633	0.0125573	0.0397566		7.06751	0.309717	0.0438226	0.0787437		7.32126	0.160526	0.021926	0.0547251
261139_at	At1g19700	Duplicate		5.03574	0.571246	0.11753	0.150089		7.62282	0.119115	0.0156261	0.045276		6.55392	0.476849	0.0727578	0.105363		8.32233	0.331816	0.0398706	0.0692156
261138_at	At1g19710	Duplicate		5.03619	0.046571	0.00926642	0.0428505		8.19985	0.0461971	0.0056339	0.0262121		6.90912	0.377954	0.0547036	0.0889809		7.4315	0.174691	0.0235068	0.0562417
261133_at	At1g19720	Unique		8.35485	0.030253	0.00358533	0.0208183		8.12863	0.14901	0.0183315	0.0474886		7.90474	1.59697	0.202027	0.159868		9.63664	0.14575	0.0151246	0.0396168
261145_at	At1g19730	Duplicate		6.36371	0.0210528	0.00325381	0.0228005		10.0341	0.0392618	0.00391282	0.0197472		8.55817	0.768301	0.089774	0.10242		8.38783	0.0708461	0.0084463	0.0317328
261141_at	At1g19740	Duplicate		8.94475	0.0314968	0.00351511	0.0198411		11.6152	0.0107132	0.000922348	0.00891116		8.62337	1.7376	0.201498	0.152861		10.4651	0.126148	0.0120542	0.0339389
261143_at	At1g19770	Unique		8.52821	0.125428	0.01489	0.0415278		11.147	0.0236119	0.00211823	0.013785		9.92687	1.39393	0.140419	0.118934		10.452	0.627709	0.0600563	0.0758018
261142_at	At1g19780	Duplicate		2.14038	0.000462538	0.000217256	0.0100481		2.7273	0.217137	0.0796161	0.170858		2.45326	1.6437	0.670009	0.522599		2.10286	0.00316545	0.00150531	0.0267551
261132_at	At1g19800	Unique		8.91774	0.0169406	0.00190914	0.0145952		10.4315	0.0419181	0.00401843	0.0196271		8.48397	0.41026	0.048357	0.0754971		9.58426	0.0519904	0.00542456	0.0237905
261137_at	At1g19830	Duplicate		2.76162	0.000792797	0.000291357	0.0101957		6.02027	0.0327913	0.00544682	0.030079		4.89271	2.27257	0.464481	0.308112		4.40324	0.0781468	0.0177476	0.0634868
261131_at	At1g19835	Unique		8.54549	0.0385077	0.00451737	0.0229634		9.18018	0.225127	0.0245232	0.0516848		9.75047	0.642382	0.0658822	0.0821999		10.1254	0.190433	0.0188074	0.0430981
255782_at	At1g19850	Unique		5.79573	0.0548941	0.00938027	0.0404255		7.21275	0.161727	0.0224224	0.0557558		7.10624	2.76488	0.389077	0.23399		7.28337	0.151756	0.020836	0.0534861
255784_at	At1g19860	Unique		6.65348	0.0603105	0.00902131	0.0369103		8.7539	0.0312193	0.00356633	0.0201841		7.13153	0.173792	0.0243696	0.0584565		8.20991	0.0828601	0.0100927	0.0350618
255783_at	At1g19870	Unique		5.85108	0.055892	0.00959301	0.0404054		8.02463	0.0534041	0.00665503	0.028798		8.07807	0.504777	0.0624873	0.0879513		8.62747	0.0594611	0.00689207	0.028264
255781_at	At1g19880	Unique		6.35238	0.0330349	0.00524656	0.0286121		8.10882	0.0413881	0.00510409	0.0250888		7.29718	0.282538	0.0387188	0.0728423		7.74979	0.042284	0.00545615	0.0265337
255815_at	At1g19890	Duplicate		2.66612	0.000654072	0.000246769	0.00959252		3.44901	0.415476	0.120462	0.186887		3.39852	2.49442	0.733973	0.464724		2.90458	0.0117506	0.00404554	0.0373204
255814_at	At1g19900	Duplicate		2.26538	0.0247316	0.0110064	0.0694201		4.47647	0.116672	0.0260633	0.076304		3.60509	9.00047	2.4966	0.832179		2.81246	0.0131301	0.00466856	0.0407425
255785_at	At1g19920	Duplicate		10.3096	0.0875071	0.00847118	0.0286932		10.4239	0.109722	0.010526	0.0317773		9.38405	0.963483	0.102672	0.1046		10.5432	0.303345	0.0287716	0.052239
255813_at	At1g19930	Duplicate		2.23168	0.000547724	0.000247469	0.0104869		5.62352	0.0363921	0.00647141	0.0339231		2.99942	0.0665633	0.0221921	0.0860162		3.79971	0.00781417	0.00205652	0.0232644
255756_at	At1g19940	Unique		2.57886	0.00070777	0.000281669	0.0103161		6.8986	0.203922	0.02956	0.0654594		4.33538	3.03456	0.699953	0.40181		3.33256	0.104041	0.0312196	0.0967886
261223_at	At1g19950	Duplicate		4.48626	0.0136577	0.00303432	0.0260498		7.06568	0.00651659	0.000922287	0.011425		5.65236	0.616998	0.109157	0.138967		5.91239	0.238357	0.0403149	0.0825755
261221_at	At1g19960	Unique		3.88752	0.410685	0.120676	0.164847		12.5973	0.195288	0.0155024	0.0350801		7.9589	4.32062	0.542866	0.261168		8.74301	1.89138	0.216331	0.1573
261220_at	At1g19970	Duplicate		5.09005	0.0754412	0.015064	0.0539613		8.32125	0.00799895	0.000961268	0.010748		6.40937	1.31424	0.205049	0.178863		6.31102	0.872313	0.138221	0.147992
261219_at	At1g19980	Unique		2.91714	0.0537782	0.0177175	0.0794961		7.1613	0.0967808	0.0135144	0.0434413		5.63684	0.668639	0.118619	0.145064		5.40237	0.155451	0.0287746	0.0729814
261230_at	At1g20010	Duplicate		9.77786	0.0704147	0.00712473	0.0271386		11.161	0.137355	0.0123067	0.0332062		9.31242	3.06753	0.329403	0.188076		9.53696	1.45657	0.152729	0.126548
261218_at	At1g20020	Duplicate		12.8006	0.0247092	0.00192895	0.0122801		13.5051	0.0281794	0.00208658	0.0124299		10.0506	10.7105	1.06566	0.325621		12.4722	0.535753	0.0429557	0.0586865
261248_at	At1g20030	Duplicate		2.1358	0.0285811	0.0131732	0.0791551		7.86803	5.37074	0.682603	0.294545		6.27647	1.58524	0.252569	0.200601		7.00759	3.60452	0.514374	0.270929
261228_at	At1g20050	Unique		9.08336	0.0920499	0.0101103	0.0334014		11.8524	0.0137357	0.00115889	0.00988822		9.74829	0.821876	0.0843097	0.0929982		10.0235	0.0708349	0.00706687	0.0265524
261247_at	At1g20070	Unique		6.61929	0.60227	0.0952716	0.117242		9.29944	0.387087	0.0416247	0.0669033		6.94951	3.4042	0.489847	0.265493		7.18077	2.15187	0.29967	0.204285
261246_at	At1g20080	Duplicate		3.068	0.00164426	0.000544548	0.0132169		3.97141	0.0507403	0.0127764	0.0567194		4.30601	1.11236	0.258328	0.244934		3.62949	0.0288964	0.00796157	0.0468357
261229_at	At1g20090	Duplicate		8.77224	0.0166017	0.00189545	0.0146881		10.1314	0.0174825	0.00172558	0.0130507		9.71336	0.499099	0.0513827	0.0727317		10.1399	0.215717	0.0212741	0.0458045
261225_at	At1g20100	Unique		8.09408	0.0525617	0.00644048	0.0283248		10.4607	0.0189389	0.00181048	0.0131558		9.14504	0.160575	0.0175587	0.0438181		8.74295	0.347463	0.0397421	0.0674211
261231_at	At1g20110	Unique		7.92943	0.0267645	0.00334952	0.0206318		10.5928	0.0341827	0.00322697	0.0174539		9.98019	0.227008	0.0227458	0.0477399		10.2157	0.054314	0.0053167	0.0228132
261222_at	At1g20120	Unique		2.38951	0.000344364	0.000144864	0.00776603		5.5035	0.0222247	0.00403828	0.0270881		3.89335	4.52025	1.16102	0.546082		4.12445	1.03953	0.252042	0.247203
261245_at	At1g20130	Unique		2.88582	0.00212066	0.000749021	0.0159576		4.64202	0.154074	0.0331912	0.0845587		4.04828	1.99798	0.493539	0.349161		3.85785	0.0395197	0.0102439	0.0515301
261244_at	At1g20150	Tandem Duplicate		2.6971	0.0113516	0.00424967	0.0395031		5.50753	0.0304569	0.00553004	0.0316873		3.6843	1.91508	0.519794	0.375611		3.86612	0.103646	0.0268087	0.0832723
261224_at	At1g20160	Tandem Duplicate		2.48752	0.0106212	0.00425484	0.0414306		7.71558	0.293025	0.0379784	0.0701591		5.9304	2.57975	0.435005	0.270835		8.09537	0.469944	0.058051	0.0846812
261243_at	At1g20180	Unique		2.78621	0.00244915	0.000888556	0.0177621		4.71528	0.113756	0.024125	0.0715286		3.77944	3.22662	0.85373	0.475277		3.37684	0.0468022	0.0138598	0.0640653
261226_at	At1g20190	Duplicate		7.0105	0.386401	0.0535325	0.0886686		9.68407	0.268459	0.0277218	0.0535034		6.76028	3.9065	0.577861	0.292368		7.20669	1.19983	0.166489	0.151993
261227_at	At1g20200	Duplicate		8.69413	0.0298121	0.0034185	0.0198596		11.2881	0.0107384	0.000951303	0.00918012		9.18369	0.276253	0.0300809	0.0572317		9.33096	0.0813099	0.00871399	0.0305594
261232_at	At1g20220	Unique		8.11571	0.0618174	0.00776007	0.0306358		9.43014	0.0502604	0.00532976	0.0237736		8.63607	0.74171	0.0858851	0.0997242		9.17851	0.176379	0.0192165	0.0457563
261277_at	At1g20230	Unique		4.25509	0.0251173	0.00589452	0.0372458		7.50818	0.0124215	0.00165439	0.014844		4.42291	0.371619	0.0840213	0.137829		5.08034	0.224572	0.0442041	0.0932792
255883_at	At1g20270	Duplicate		4.49006	0.149403	0.0343265	0.0860851		7.62077	0.0236643	0.00310524	0.0201859		6.51009	0.228152	0.0350459	0.0733711		7.00703	0.0937608	0.013381	0.0436995
255882_x_at	At1g20280			3.24845	0.00368439	0.0011547	0.0186856		6.36973	0.236503	0.0371292	0.076348		3.38306	0.304818	0.0901011	0.163196		4.21863	0.037437	0.00887422	0.0458648
255914_at	At1g20290	Unique		2.78682	0.00136421	0.000495185	0.0132535		3.42274	0.123823	0.0361766	0.102808		2.86133	0.14663	0.0512454	0.133827		3.23265	0.0359007	0.0111056	0.0586128
255888_at	At1g20300	Unique		5.47788	0.106487	0.020114	0.059571		7.81189	0.0203249	0.00260179	0.0182498		7.09566	0.320687	0.0451948	0.0798083		7.79071	0.140487	0.0180327	0.0481107
255884_at	At1g20310	Unique		2.59874	0.00048616	0.000188583	0.0084845		6.82094	0.0632351	0.00927072	0.0368667		4.29484	1.24507	0.289898	0.259806		3.88835	0.888902	0.228606	0.242472
255885_at	At1g20330	Duplicate		10.0854	0.0330045	0.00329916	0.0180133		11.0387	0.00724185	0.000656039	0.00770913		10.2145	0.970931	0.0950538	0.0964662		10.8502	0.34408	0.0317118	0.0540619
255886_at	At1g20340	Duplicate		14.1719	0.00164842	0.00011663	0.00286488		14.1253	0.0190576	0.00134918	0.00977322		12.1806	6.76552	0.555434	0.213541		14.5185	0.0812932	0.0055993	0.0196384
255941_at	At1g20350	Duplicate		1.97489	0.000357985	0.000182072	0.00958055		7.92374	0.37615	0.0474713	0.0774017		4.86667	3.8004	0.780903	0.400574		4.95401	1.63945	0.330934	0.258459
255887_at	At1g20370	Unique		6.09413	0.0270529	0.00445926	0.0269895		7.75145	0.0313219	0.00404078	0.0228319		6.63396	0.428519	0.0645948	0.0986762		7.80251	0.0907728	0.0116338	0.0386139
255940_at	At1g20380	Duplicate		4.86802	0.0978231	0.0198358	0.0642493		8.18896	0.147463	0.0180075	0.0468935		5.76627	0.640648	0.111103	0.138808		6.67286	0.0877526	0.0131507	0.0443933
259573_at	At1g20390			2.46184	0.580244	0.221009	0.309418		6.17459	0.069535	0.0112615	0.0427064		3.9275	0.834623	0.212507	0.23261		5.5647	0.160851	0.0289056	0.0720726
259572_at	At1g20400	Unique		2.48131	0.00460333	0.0018691	0.0273436		3.13352	2.30032	0.734103	0.484019		3.27589	0.0690072	0.0210652	0.0801895		3.97484	0.0222558	0.00559917	0.037532
259571_at	At1g20410	Unique		5.7839	0.089657	0.0157016	0.0517692		8.17223	0.0211451	0.00258743	0.0177936		6.21054	0.738609	0.118928	0.138381		6.18793	0.133302	0.0215423	0.0590029
259515_at	At1g20430	Unique		7.11783	0.0656545	0.00919153	0.0359985		9.87128	0.135772	0.0137543	0.0373278		8.18274	0.531698	0.064978	0.0891115		7.85662	0.0733207	0.00933234	0.0344649
259570_at	At1g20440	Tandem Duplicate		8.2108	0.168099	0.0202177	0.0499341		12.8103	0.0562898	0.0043941	0.0185206		10.7178	3.47298	0.324039	0.173879		11.2793	2.55542	0.226559	0.141726
259516_at	At1g20450	Tandem Duplicate		7.69034	0.211248	0.0273006	0.0597656		13.2431	0.0986192	0.00744686	0.0237133		11.1055	1.63838	0.147529	0.115258		10.7262	3.50081	0.326381	0.174438
259569_at	At1g20480	Duplicate		2.60869	0.00137419	0.000532273	0.0142102		4.1162	0.0842136	0.0204591	0.0705009		3.83832	0.535913	0.139622	0.190724		3.88403	0.115674	0.029782	0.0875661
259568_at	At1g20490	Tandem Duplicate		3.39905	0.127214	0.0380046	0.104932		7.02049	1.72191	0.245268	0.186912		5.16827	0.644103	0.124627	0.155286		5.51025	0.344373	0.0624969	0.106499
259567_at	At1g20500	Tandem Duplicate		2.49641	0.000782912	0.000315862	0.0112083		3.94604	0.100428	0.0254504	0.0803095		3.45268	2.91984	0.845672	0.494906		3.27701	0.0139175	0.00424703	0.0360001
259518_at	At1g20510	Duplicate		6.38676	0.220426	0.0352284	0.0735108		10.4852	0.0263721	0.00251518	0.015488		8.4637	1.84664	0.218183	0.160558		8.36764	1.0315	0.123272	0.121375
259566_at	At1g20520	Duplicate		2.25478	0.000313847	0.000141829	0.00785695		5.33079	0.0547103	0.0102631	0.0438776		3.16715	0.202943	0.0640775	0.142239		3.00418	0.020083	0.00668501	0.0471724
259565_at	At1g20530	Unique		3.08163	0.00353351	0.00115603	0.0192896		2.48464	0.554241	0.223067	0.29963		3.72015	0.267598	0.0719319	0.139053		3.77904	0.0393911	0.0104236	0.0525191
259564_at	At1g20540	Duplicate		7.50803	0.0236173	0.00313356	0.0204686		9.2989	0.0498538	0.00536126	0.0240114		8.53229	0.315948	0.0370297	0.0658783		9.47739	0.0966732	0.0102004	0.0328068
259539_at	At1g20550	Duplicate		3.68993	0.00530063	0.00145082	0.0197309		5.91371	0.0321839	0.00544225	0.0303361		5.1918	1.2507	0.240899	0.215406		4.98548	0.090646	0.018182	0.0603903
259545_at	At1g20560	Duplicate		6.89299	0.0158563	0.00227936	0.0182681		8.39075	0.0818724	0.00975746	0.0341011		7.84932	0.39828	0.0507407	0.0804011		8.57496	0.288952	0.0336972	0.0626874
259542_at	At1g20575	Unique		6.54252	0.068986	0.0103921	0.0401454		9.15428	0.0315376	0.00344512	0.0193995		8.27646	0.156008	0.0188495	0.047723		8.54909	0.0518742	0.0060678	0.0266413
259543_at	At1g20580	Unique		9.17868	0.0109844	0.00120025	0.0114185		9.56903	0.0612349	0.00639928	0.0258602		9.65691	0.551953	0.0571562	0.076933		10.0032	0.0782023	0.00781774	0.0279558
259563_s_at	At1g20590	Unique		4.17114	0.131362	0.0306037	0.086892		6.88349	0.199102	0.0289246	0.0648231		5.72292	1.71227	0.299196	0.228649		5.66781	0.423623	0.0747418	0.114835
259544_at	At1g20620	Tandem Duplicate		11.6429	3.44445	0.300369	0.159404		14.1618	0.0128856	0.000909881	0.00801555		12.5449	1.82817	0.14573	0.10778		13.294	0.527862	0.0397069	0.054652
259517_at	At1g20630	Tandem Duplicate		7.06364	0.37873	0.0506076	0.0871237		10.8099	0.100177	0.00926718	0.0292795		9.14621	2.46882	0.269928	0.171792		8.78201	0.791034	0.0900743	0.101275
259540_at	At1g20640	Duplicate		4.88103	0.0439574	0.00899892	0.0429541		8.50788	0.0253485	0.00297941	0.0187135		6.63818	0.344995	0.0519713	0.0884825		7.01524	0.546364	0.0778824	0.105365
259541_at	At1g20650	Unique		7.97258	0.0427906	0.00538598	0.0259463		9.79054	0.0306427	0.00312983	0.0178796		8.42181	1.05741	0.125557	0.1221		9.74523	0.354147	0.0363406	0.061066
256078_at	At1g20670	Duplicate		4.39145	0.0778749	0.0176833	0.0635464		7.62929	0.0180666	0.00236806	0.0176179		6.57073	0.207733	0.0316149	0.0693648		7.29659	0.115872	0.0158803	0.0466519
256079_at	At1g20680	Unique		2.5122	0.000827079	0.000330986	0.0114477		4.9504	0.124586	0.0251667	0.0713006		3.04318	0.134069	0.0440554	0.120319		2.76025	0.0460257	0.0166745	0.0777234
256080_at	At1g20690	Unique		2.48797	0.0017748	0.000717104	0.0169328		5.23757	0.0241582	0.00461248	0.0296758		2.72771	0.130604	0.0478805	0.132489		2.94844	0.0217435	0.00737458	0.0500118
256091_at	At1g20693	Unique		9.20885	0.110448	0.0117099	0.0360888		12.4783	0.0361213	0.00289473	0.0152309		11.0169	0.484701	0.0439962	0.0631944		11.1233	1.1764	0.10576	0.0975089
256092_at	At1g20696	Unique		10.321	0.0983363	0.00942682	0.0303833		12.6789	0.0202078	0.00159381	0.0112118		11.4973	0.452634	0.0393685	0.0585162		11.3699	0.599111	0.0526925	0.0680762
256081_at	At1g20700	Tandem Duplicate		2.63959	0.00814002	0.00309843	0.0341804		5.57271	0.0235324	0.00422279	0.0275275		4.39087	0.940088	0.2141	0.220817		4.33585	0.0343428	0.00792066	0.0427409
256082_at	At1g20720	Unique		2.62413	0.0063538	0.00242553	0.030376		5.75541	0.208066	0.0361514	0.0792546		3.9831	0.632128	0.158703	0.19961		3.821	0.176366	0.0461571	0.109908
256083_at	At1g20730	Unique		2.77986	0.00177584	0.000645231	0.0151593		4.29869	0.69698	0.162138	0.194211		3.82997	0.06591	0.017209	0.0670318		4.87806	0.0267255	0.00547872	0.0335132
256084_at	At1g20750	Unique		2.56781	0.00245028	0.000961716	0.0192772		5.10481	0.0688348	0.0134843	0.0513954		3.30574	0.101423	0.0306808	0.0963384		3.66285	0.124092	0.0338785	0.0961728
256085_at	At1g20760	Unique		6.23653	0.0290593	0.00464597	0.0273338		9.11056	0.00981121	0.0010769	0.0108722		8.52518	0.113947	0.013366	0.0395958		8.49285	0.0281229	0.00331136	0.0197459
256086_at	At1g20770	Unique		7.04632	0.0743609	0.0105606	0.0386999		10.0651	0.00502307	0.00049906	0.00704154		7.72219	0.149099	0.0193079	0.0500031		8.09883	0.0464125	0.00573077	0.0266008
256094_at	At1g20780	Duplicate		3.55802	0.00310273	0.000889014	0.0156554		7.68746	0.0402064	0.00523013	0.0260834		5.19868	0.35569	0.0684192	0.114721		6.20704	0.126973	0.0204563	0.0574078
256087_at	At1g20800	Unique		2.42666	0.000461657	0.000194041	0.00885421		6.03735	0.00942247	0.0015607	0.0160781		2.83552	0.0584798	0.020624	0.0852846		3.39336	0.0119034	0.00350786	0.0321519
256088_at	At1g20810	Unique		8.46433	0.0132192	0.00156931	0.0135834		10.2807	0.143509	0.0139591	0.0368483		7.68085	1.46474	0.190701	0.157569		9.11732	0.114801	0.0125915	0.0371625
256090_at	At1g20816	Duplicate		6.85102	0.0152537	0.00222607	0.0180274		8.37588	0.0493324	0.00588981	0.0265177		6.65322	0.263905	0.0396657	0.0772132		7.95678	0.182539	0.0229412	0.0536957
256093_at	At1g20823	Duplicate		3.58504	0.196255	0.054899	0.123571		7.58616	0.0459003	0.00605053	0.0282414		7.01703	1.37694	0.196228	0.167226		6.38087	1.36634	0.214131	0.183189
256089_at	At1g20830	Unique		6.91571	0.0644935	0.00924498	0.0367216		8.18221	0.0672821	0.00822298	0.0317015		6.29313	0.774816	0.123121	0.139873		7.59679	0.0678629	0.0089331	0.0342915
262797_at	At1g20840	Duplicate		7.14583	0.408219	0.0579686	0.0894116		10.5266	0.0811542	0.00770948	0.0270626		8.6414	1.26208	0.14605	0.130005		7.96226	0.737315	0.0926013	0.107843
262796_at	At1g20850	Duplicate		9.17301	0.0597376	0.00644567	0.0266448		9.57492	0.110361	0.011526	0.0346954		9.15855	3.99435	0.436134	0.218221		10.6754	0.0871998	0.00816833	0.0276615
262855_at	At1g20860	Duplicate		1.93556	0.000313858	0.00016307	0.00915293		6.19763	0.061213	0.00987684	0.0399205		2.58666	0.314639	0.121639	0.216854		2.7741	0.00929482	0.00335057	0.0347534
262854_at	At1g20870	Unique		2.90699	0.0498256	0.0166043	0.0767862		6.71195	0.0458964	0.00683802	0.0319184		5.12313	2.21489	0.432331	0.290496		5.17376	0.403681	0.0780248	0.122804
262804_at	At1g20880	Duplicate		2.39991	0.0191207	0.00780275	0.057618		8.09175	0.0237157	0.00293085	0.0190316		6.14556	0.854615	0.139062	0.150426		6.55837	0.155094	0.0236482	0.0600484
262853_at	At1g20890	Unique		4.66228	0.0353034	0.00759226	0.0403004		8.2595	0.0102457	0.00124048	0.0122551		6.95001	0.206336	0.0296886	0.0653585		6.87531	0.0976009	0.0141959	0.0454396
262805_at	At1g20900	Duplicate		2.63144	0.0014061	0.000544513	0.01425		6.06901	0.0455895	0.00751186	0.0351815		3.90635	2.68728	0.687927	0.419648		3.80445	0.110816	0.0291279	0.0875002
262852_at	At1g20910	Duplicate		4.81346	0.012059	0.00251497	0.0228139		8.25615	0.0442109	0.00535491	0.0254676		6.74316	0.320223	0.0474886	0.0839195		7.57277	0.0941122	0.0124277	0.0405105
262851_at	At1g20920	Unique		5.60057	0.00732625	0.0013085	0.015283		8.03043	0.0516821	0.00643578	0.0283094		6.84307	0.0974612	0.0142423	0.045621		7.83259	0.143867	0.0183677	0.0484256
262802_at	At1g20930	Duplicate		6.11728	0.128352	0.0207122	0.0585657		7.56423	0.0371103	0.00490602	0.0254673		7.25383	1.60371	0.221085	0.174581		7.24112	0.281314	0.0388495	0.073247
257464_at	At1g20940	Unique		2.53765	0.00130124	0.000517794	0.014215		5.82157	0.0377253	0.00648026	0.0333639		2.94783	0.228163	0.0774004	0.162039		5.66417	0.0283566	0.00500631	0.0297297
262806_at	At1g20950	Duplicate		10.2168	0.0341634	0.00335328	0.0180912		10.4037	0.0413288	0.0039725	0.0195406		9.70486	2.0612	0.212388	0.147935		10.2433	0.300805	0.029366	0.053543
262800_at	At1g20960	Duplicate		8.60415	0.0113767	0.0013168	0.0123965		9.54364	0.148201	0.0155288	0.0403378		9.2487	0.283914	0.0306977	0.0576119		9.82363	0.0601863	0.00612668	0.0249733
262799_at	At1g20970	Unique		3.07453	0.00119683	0.000392805	0.0112522		5.56906	0.247648	0.0444685	0.0893584		4.09228	0.0776403	0.0189724	0.0680891		4.98702	0.0181244	0.00363432	0.0269955
262798_at	At1g20980	Unique		7.18869	0.020164	0.00279104	0.0197533		10.2667	0.018434	0.00179552	0.0132245		9.36119	1.08185	0.115567	0.11111		9.15644	0.119608	0.0130627	0.0377705
262803_at	At1g21000	Duplicate		7.04462	0.453176	0.064632	0.0955599		10.826	0.104651	0.0096666	0.0298815		9.18475	3.59964	0.391915	0.206568		10.0262	0.752205	0.0750238	0.0865029
262801_at	At1g21010	Duplicate		4.22762	0.896014	0.220647	0.223904		8.77644	0.0600151	0.00683821	0.0279134		6.3246	2.26876	0.35872	0.238156		6.40514	1.11374	0.173881	0.164764
261452_s_at	At1g21020	Unique		3.09787	0.0154311	0.00504665	0.0400991		5.18089	0.0391937	0.00756506	0.0382124		4.02859	0.24137	0.0599143	0.121952		4.45916	0.0478563	0.0107321	0.0490588
261456_at	At1g21050	Duplicate		5.85062	0.348459	0.0595544	0.100896		8.67068	0.0209069	0.00241122	0.016676		7.01748	1.61325	0.229891	0.180996		8.54982	1.19938	0.140281	0.128092
261451_at	At1g21060	Duplicate		4.96744	0.0743399	0.0151697	0.0548882		5.52889	1.23487	0.223349	0.200989		5.31794	1.55301	0.292032	0.234338		7.2961	0.375665	0.0514885	0.0840059
261457_at	At1g21065	Unique		10.6444	0.0538561	0.00509037	0.021802		12.7918	0.0409362	0.0032002	0.015817		10.1333	1.04928	0.103548	0.101087		11.1134	0.0716771	0.00644964	0.0240904
261455_at	At1g21070	Duplicate		5.51163	0.00930846	0.00168121	0.0175049		7.92747	0.0289528	0.00365221	0.021464		6.29227	1.82589	0.29018	0.214748		5.92481	0.251914	0.0425186	0.0847134
261458_at	At1g21080	Duplicate		8.08636	0.0238739	0.00299302	0.0191077		9.96739	0.0289222	0.00290168	0.0170622		9.2213	0.203658	0.0220857	0.0489395		9.60093	0.108728	0.0113248	0.0343445
261454_at	At1g21090	Unique		3.48279	0.111748	0.0321446	0.0959827		7.87364	0.0594581	0.00755154	0.0309692		5.78463	3.14655	0.543951	0.306649		5.50629	0.452085	0.0821034	0.12211
261459_at	At1g21100	Tandem Duplicate		2.79233	0.0033831	0.00128715	0.0208301		7.16986	2.94165	0.410281	0.239213		4.62046	7.85247	1.6995	0.606482		5.6297	1.66338	0.295465	0.229092
261450_s_at	At1g21110	Tandem Duplicate		3.08808	0.00426167	0.00139963	0.0211398		6.38615	0.771075	0.120742	0.137502		4.78675	4.27489	0.893066	0.431938		4.96623	2.77162	0.558094	0.335228
261449_at	At1g21120	Tandem Duplicate		5.54504	0.298668	0.0522987	0.0985575		7.8737	3.38681	0.430142	0.233731		5.88593	1.64195	0.278962	0.217703		6.54535	1.94756	0.297549	0.213212
261453_at	At1g21130	Tandem Duplicate		4.64599	1.51327	0.343385	0.264777		8.31004	3.31544	0.398968	0.219113		6.71959	7.99353	1.18959	0.420753		9.81258	1.1181	0.113945	0.10776
261448_at	At1g21140	Duplicate		2.27038	0.00332017	0.00146044	0.0253794		7.21155	0.14346	0.0198931	0.0525214		6.41211	2.93493	0.457717	0.267176		6.59521	0.634054	0.0961387	0.120735
261447_at	At1g21160	Unique		3.59921	0.0487016	0.0132978	0.0613147		6.4603	0.151974	0.0235243	0.0603438		6.61128	0.204613	0.0309491	0.0684196		6.85446	0.107182	0.0156368	0.0477625
261446_at	At1g21170	Duplicate		2.93127	0.0102951	0.00357513	0.0346146		6.50541	0.0407421	0.00626281	0.0310275		4.75066	0.179887	0.0378657	0.0892784		5.56686	0.0795575	0.0142913	0.0506676
259551_at	At1g21190	Duplicate		6.09319	0.0129291	0.00209975	0.0186612		8.40791	0.048	0.0057089	0.0260575		7.54586	0.163642	0.0216863	0.0536091		8.08307	0.129838	0.0160629	0.0445784
259562_at	At1g21200	Duplicate		2.80917	0.00416755	0.00148927	0.0229807		7.13303	0.257096	0.0360431	0.0710843		6.22338	0.314611	0.050553	0.0901281		6.09552	0.131259	0.0215337	0.0594367
259557_at	At1g21210	Tandem Duplicate		3.41214	0.00781056	0.00233891	0.0259009		4.83393	0.0791386	0.0163715	0.0581961		4.46958	0.176643	0.0395212	0.0940334		4.69745	0.0390505	0.00831314	0.042068
259554_at	At1g21220			2.73716	0.00164298	0.000605554	0.0148087		6.57727	0.124517	0.0189314	0.0536498		3.39847	0.256329	0.0754249	0.148976		3.90415	0.0324042	0.00829994	0.0461077
259558_at	At1g21230	Tandem Duplicate		3.20239	0.00571934	0.00181265	0.0236156		3.96045	0.0495786	0.0125184	0.0562216		3.56945	0.220827	0.061866	0.131651		4.09148	0.0711484	0.0173894	0.0651933
259559_at	At1g21240	Tandem Duplicate		2.35612	0.00119768	0.000513474	0.0146883		7.51611	0.0707355	0.00941119	0.0353855		3.65162	2.02815	0.555411	0.39		3.6781	1.78119	0.484268	0.362854
259561_at	At1g21250	Tandem Duplicate		2.95798	0.100503	0.0348961	0.107175		12.6118	0.0536258	0.00425204	0.0183616		8.1567	9.37312	1.14913	0.375343		10.2281	1.43933	0.140724	0.117297
259560_at	At1g21270	Tandem Duplicate		4.55606	0.618368	0.13634	0.172597		10.6532	0.0345777	0.00324576	0.0174549		7.06349	3.82453	0.541451	0.276866		9.26304	0.788947	0.0851715	0.0958894
259555_at	At1g21290			2.20661	0.0010414	0.00047075	0.0146246		2.97403	0.0463541	0.0155863	0.0723934		2.67173	0.0708587	0.0265216	0.0996331		1.98657	0.0157588	0.00793269	0.0631915
259556_at	At1g21300			2.22216	0.000668871	0.000302307	0.0116384		4.74322	0.0812674	0.0171334	0.0601015		2.22562	0.0636856	0.0286147	0.113389		2.24208	0.00580348	0.00258843	0.0339776
259553_x_at	At1g21310	Unique		5.09775	0.318472	0.0606466	0.110702		8.87066	0.19778	0.022296	0.0501343		7.57662	4.19213	0.553299	0.270235		5.28377	0.823697	0.155892	0.171767
259552_at	At1g21320	Duplicate		2.30212	0.000528778	0.000231103	0.0099887		5.40568	0.111812	0.0206843	0.0618579		2.53505	0.0616884	0.0243342	0.0979751		3.09591	0.00756983	0.0024451	0.0281031
260925_at	At1g21340	Unique		2.44555	0.00391999	0.00161313	0.0256015		4.20818	0.2152	0.0511386	0.110237		2.88115	0.110258	0.0382689	0.11525		3.85489	0.039852	0.0103381	0.0517861
260872_at	At1g21350	Unique		8.4878	0.55896	0.0642493	0.0880836		9.82592	0.170551	0.0173572	0.0420294		7.09884	2.24861	0.316758	0.211237		8.36698	0.147867	0.0176727	0.0459586
260926_at	At1g21360	Unique		2.41316	0.00194642	0.00081467	0.0182823		2.92106	0.293137	0.100353	0.185351		3.31189	1.12592	0.339962	0.320389		3.28499	0.0379483	0.011552	0.059301
260899_at	At1g21370	Unique		3.62246	0.0217984	0.00584299	0.0407576		9.66518	0.0291756	0.00301863	0.0176726		7.50214	0.387481	0.0516493	0.0829736		7.60785	0.190235	0.0250051	0.0573302
260880_at	At1g21380	Duplicate		6.69243	0.02962	0.00443225	0.0257163		10.2948	0.0176865	0.00171801	0.0129183		7.7649	0.283341	0.03649	0.0685519		7.9625	0.127781	0.0160478	0.0448934
260874_at	At1g21390	Unique		3.64907	0.00269379	0.00074175	0.0142233		6.92839	0.123251	0.0177892	0.0506713		4.21074	0.234642	0.0557247	0.115039		3.82385	0.0767829	0.02008	0.0724656
260900_s_at	At1g21400	Duplicate		4.08947	0.0171606	0.00417715	0.0320332		8.02414	0.116816	0.0145581	0.0425944		8.14295	2.58365	0.317286	0.197394		8.97085	1.09762	0.122354	0.116786
260875_at	At1g21410	Duplicate		5.36452	0.168725	0.0308427	0.0765699		8.88901	0.0680195	0.00765208	0.0293402		8.14778	1.43678	0.17634	0.147114		8.83023	0.664312	0.0752315	0.0923026
260901_at	At1g21430	Duplicate		2.24585	0.000600149	0.00026867	0.0109081		3.75692	0.508916	0.135461	0.189885		3.27006	0.140594	0.0429944	0.114664		3.51354	0.0240405	0.00684223	0.0441292
260902_at	At1g21440	Duplicate		8.61772	0.311736	0.0349419	0.0647889		11.1072	0.330939	0.0297951	0.051793		9.44652	1.65167	0.174844	0.136047		10.2527	0.315292	0.0307521	0.0547668
260878_at	At1g21450	Unique		3.95809	0.263383	0.065566	0.129661		8.67906	0.067109	0.00773229	0.0298482		6.84465	0.829665	0.121214	0.133076		8.05278	0.188435	0.0233999	0.0539057
260876_at	At1g21460	Unique		6.94179	0.636465	0.0891005	0.114925		10.3634	0.138025	0.0133186	0.0358492		7.84809	4.03084	0.513609	0.25582		9.01487	0.576953	0.0640001	0.0842579
260879_at	At1g21480	Unique		6.51732	0.06989	0.0107646	0.0405638		8.15419	0.0202471	0.00248303	0.0174502		7.80148	0.261581	0.0335296	0.065558		8.08729	0.0890606	0.0110124	0.0369011
260877_at	At1g21500	Unique		11.053	0.0629016	0.00569543	0.0226909		11.6936	0.12718	0.0108761	0.0304974		9.23453	7.52928	0.81534	0.29714		12.4262	0.829075	0.0667199	0.0732754
260918_at	At1g21510	Unique		2.26913	0.000435585	0.000193614	0.00919767		5.30774	0.0987379	0.0186026	0.0592015		2.58671	0.0269512	0.0104191	0.0634662		2.70273	0.0109952	0.00406817	0.038797
260919_at	At1g21520	Unique		2.42004	0.00509318	0.00213228	0.0294899		10.2258	0.553483	0.0541262	0.0727537		5.91983	2.13951	0.361415	0.247086		5.71092	0.958026	0.167753	0.171389
260920_at	At1g21530	Tandem Duplicate		2.48689	0.00104649	0.000424893	0.013008		3.77215	0.337002	0.0893395	0.153896		2.69499	0.0772452	0.0286625	0.103128		3.47046	0.0555529	0.0160074	0.0679152
260921_at	At1g21540	Tandem Duplicate		4.38389	0.066884	0.0151615	0.0589932		5.31025	0.0273503	0.00515047	0.0311434		4.9891	3.05919	0.613173	0.350575		5.40158	0.382108	0.0707401	0.114439
260881_at	At1g21550	Unique		2.57226	0.0027876	0.00108906	0.0205258		7.85659	0.507128	0.0645481	0.090641		4.74646	3.69363	0.778186	0.404908		4.88865	2.94327	0.602062	0.350935
260922_at	At1g21560	Unique		7.35512	0.060204	0.00811104	0.0333597		8.78798	0.0882692	0.0100443	0.0338077		8.25784	1.16836	0.141485	0.130895		8.56369	0.220862	0.0257905	0.0548781
260923_at	At1g21570	Unique		7.29029	0.0046983	0.000649938	0.00940211		9.10605	0.0270706	0.00297281	0.0180684		8.20261	0.178717	0.0217878	0.0515384		9.47619	0.042945	0.00453189	0.0218687
260873_at	At1g21580	Unique		4.55015	0.0381181	0.00840669	0.0429082		7.20637	0.0545621	0.00757138	0.0324137		5.89582	0.707712	0.120036	0.142687		7.02297	0.17568	0.0250151	0.0596816
260924_at	At1g21590	Duplicate		6.99626	0.129101	0.0181573	0.0513569		10.2705	0.0636638	0.0061987	0.0245671		7.77969	0.925702	0.11899	0.123673		9.61177	0.352389	0.0366623	0.0617601
262502_at	At1g21600	Unique		9.04526	0.014537	0.00157946	0.0133296		10.3512	0.0137082	0.00132431	0.0113109		8.00253	1.33306	0.16658	0.144277		8.77006	0.442787	0.0504884	0.0758743
262487_at	At1g21610	Duplicate		4.8993	0.0583967	0.0121236	0.0493242		8.13859	0.0157257	0.00193224	0.0154083		6.6383	0.0738302	0.0111219	0.0409318		7.11605	0.118008	0.0165834	0.0482744
262492_at	At1g21630	Unique		7.25268	0.0145647	0.00201686	0.01664		9.80647	0.0558546	0.00569568	0.0241		8.24038	0.0756127	0.00917588	0.0333695		8.89646	0.0430141	0.00483497	0.0233125
262506_at	At1g21640	Unique		7.47755	0.0164022	0.00217392	0.0171274		10.0696	0.0317392	0.00315198	0.0176924		8.53015	0.455803	0.0534344	0.0791465		9.86849	0.0839648	0.00850837	0.0293628
262491_at	At1g21650	Unique		5.43306	0.0920763	0.0164693	0.0558508		6.79917	0.0706281	0.0103878	0.039087		5.8175	0.767645	0.131955	0.150607		6.05873	0.33061	0.0545676	0.0949023
262493_at	At1g21660	Unique		6.99389	0.0245915	0.0034993	0.022422		9.28105	0.021301	0.00229511	0.0157255		8.01484	0.240371	0.0299908	0.0611711		8.37849	0.114948	0.0137194	0.0404655
262503_at	At1g21670	Tandem Duplicate		7.0804	0.51671	0.071157	0.101523		11.4808	0.0386123	0.0033632	0.0171155		8.11993	2.32736	0.286623	0.18788		10.0215	0.861208	0.085936	0.0926022
262505_at	At1g21680	Tandem Duplicate		8.28255	0.223055	0.02604	0.0570219		11.8838	0.0342139	0.00287905	0.015565		9.68028	2.15681	0.222805	0.151711		10.9938	0.88808	0.0807802	0.0857193
262501_at	At1g21690	Unique		7.50262	0.209041	0.0278457	0.0609401		9.24524	0.0693171	0.0074976	0.0284775		8.05992	0.633209	0.0785627	0.0987285		8.21717	0.0644247	0.00784025	0.030889
262484_at	At1g21700	Unique		6.90885	0.00505849	0.000735369	0.0102945		8.60806	0.0453649	0.00527006	0.0247432		8.00867	0.181716	0.0226899	0.0532275		8.24598	0.0414684	0.00502892	0.0246954
262498_at	At1g21710	Unique		4.92803	0.0509372	0.0102823	0.0457977		8.52984	0.0258752	0.00303349	0.0188582		6.45604	0.221202	0.0342628	0.0728498		6.4684	0.126938	0.0196243	0.0550806
262497_at	At1g21720	Duplicate		9.35306	0.0452185	0.00481949	0.0227355		11.7457	0.00606554	0.000516403	0.00663062		9.83971	0.219522	0.0223098	0.0476164		10.3023	0.0543172	0.00527232	0.0226221
262485_at	At1g21730	Unique		3.51027	0.065371	0.0184779	0.0728369		4.98997	1.2303	0.246554	0.222283		5.54566	0.401919	0.0724746	0.114318		6.00943	0.311665	0.0518626	0.0928989
262486_at	At1g21740	Duplicate		4.37629	0.0619382	0.0145485	0.0568687		5.05791	0.142403	0.0281544	0.0746084		6.04094	0.904066	0.149656	0.157397		5.99111	0.0868134	0.0144904	0.0491797
262504_at	At1g21750	Duplicate		9.30711	0.0613723	0.00654748	0.0266177		12.1379	0.0877185	0.00722685	0.0244008		10.7561	0.566487	0.0526667	0.0699747		10.0177	0.480957	0.0480108	0.0692287
262500_at	At1g21760	Unique		7.59942	0.0240467	0.00315901	0.0204055		10.0857	0.0280675	0.0027829	0.016611		8.96874	0.385317	0.0429623	0.0692114		9.95153	0.0718685	0.00722186	0.0269389
262499_at	At1g21770	Unique		8.24837	0.0422966	0.0050977	0.0249336		11.1476	0.810709	0.0727251	0.0807704		10.0416	0.676789	0.0673987	0.0819266		10.7756	0.135675	0.0125909	0.0341828
262495_at	At1g21780	Duplicate		5.28075	0.0561133	0.010664	0.0448577		8.79284	0.124645	0.0141757	0.0401521		7.26257	0.633628	0.0872458	0.109604		8.09399	0.13113	0.0162009	0.0447392
262496_at	At1g21790	Unique		4.5544	0.0919318	0.0206809	0.0665736		9.53048	0.0732668	0.00768763	0.0284013		7.16431	0.795815	0.11108	0.124518		7.6748	1.83963	0.239697	0.176725
262494_at	At1g21810	Unique		3.09611	0.13057	0.0405011	0.116709		6.39602	0.0308026	0.0048159	0.02744		4.45987	1.47294	0.330266	0.272127		5.4083	0.200089	0.0369966	0.0827085
262488_at	At1g21820			6.72687	0.1354	0.02005	0.0547011		8.1823	0.0390716	0.00477514	0.0241577		7.90746	0.931968	0.117859	0.122085		8.65348	0.575178	0.0664678	0.0876416
262489_at	At1g21830	Unique		5.9807	0.00866698	0.00146532	0.0155662		9.32324	0.0189949	0.00203737	0.0147826		7.26615	0.303613	0.0417847	0.0758327		7.5518	0.236358	0.0312982	0.0643776
262490_at	At1g21840	Unique		3.484	0.0492979	0.0137243	0.0637289		8.10325	0.0347873	0.004293	0.0230171		6.68157	0.144657	0.0216502	0.0569234		7.59239	0.154065	0.0202921	0.051698
260848_at	At1g21850	Tandem Duplicate		2.19155	0.000652502	0.000298898	0.0116557		5.82853	0.216727	0.0371839	0.0798726		2.24177	0.491284	0.21915	0.312662		2.16418	0.00775476	0.00358324	0.0406903
260849_at	At1g21860	Tandem Duplicate		2.30135	0.00240545	0.00108888	0.0213115		2.86497	0.0222293	0.007759	0.0520406		2.42395	0.335336	0.138343	0.238901		2.71268	0.0235646	0.00868683	0.0565889
260850_at	At1g21870	Duplicate		1.74135	0.000260577	0.000150049	0.00927006		4.73986	0.177946	0.0375423	0.0889975		2.25025	0.109833	0.0488092	0.147277		3.39851	0.0412051	0.0121245	0.0597293
260857_at	At1g21880	Duplicate		8.40441	0.0255159	0.00303406	0.0190063		9.4267	0.076585	0.00812427	0.029357		8.11647	1.82456	0.224797	0.166422		8.37215	0.212272	0.0253545	0.0550312
260851_at	At1g21890	Duplicate		2.13299	0.000606064	0.000286227	0.0115417		4.7088	0.17565	0.0373024	0.0890048		2.57219	0.45299	0.176111	0.261663		2.65143	0.0349928	0.0131977	0.070552
260852_at	At1g21900	Duplicate		7.97141	0.0300411	0.00380522	0.0217431		11.1281	0.0784886	0.00705319	0.0251758		9.14348	0.360252	0.0393998	0.0656434		9.23373	0.148253	0.0160555	0.0416988
260856_at	At1g21910	Duplicate		5.30982	0.510873	0.104096	0.13461		7.10154	0.230058	0.0323954	0.0675407		7.1271	5.67473	0.796218	0.334241		7.1296	4.57251	0.641342	0.299925
260855_at	At1g21920	Duplicate		7.14095	0.0642552	0.00913815	0.0354975		9.71077	0.0341045	0.00351203	0.0190175		9.64349	1.04636	0.108505	0.106074		10.2563	0.476096	0.0464198	0.0672753
260853_at	At1g21950	Unique		1.8965	0.000337145	0.000178271	0.0096818		3.10765	0.0254926	0.00820317	0.0513777		2.38535	0.183261	0.0768275	0.179466		3.60798	0.0207141	0.00574121	0.0398905
260854_at	At1g21970	Unique		1.93926	0.000764678	0.000394527	0.0142594		4.69218	0.118538	0.0252629	0.073376		2.91788	1.79968	0.616777	0.459759		3.83923	0.0167545	0.00436402	0.0337148
255959_at	At1g21980	Duplicate		6.56655	0.0791363	0.012318	0.0428401		8.01518	0.0593749	0.00740781	0.030401		7.90767	0.418015	0.052862	0.0817612		8.61954	0.202437	0.0234858	0.0521988
255976_at	At1g22010	Unique		2.7484	0.00638188	0.00234907	0.0290666		5.2934	0.119036	0.0224876	0.0651784		3.21137	1.07032	0.333292	0.322157		3.36764	0.0344393	0.0102266	0.0551064
255956_at	At1g22015	Duplicate		2.39366	0.00209526	0.000879244	0.0191231		4.36776	0.0826102	0.0189136	0.0658049		3.62379	1.96357	0.541856	0.386688		2.48694	0.0103019	0.00414238	0.0408124
255946_at	At1g22020	Duplicate		6.27136	0.0331955	0.00531176	0.0290521		8.97079	0.044305	0.00493881	0.0234637		7.04814	0.168904	0.0239643	0.0583102		7.59054	0.0314028	0.0041371	0.0233459
255955_at	At1g22030	Duplicate		2.68574	0.00926675	0.00345588	0.0358426		7.11659	0.0540833	0.00759962	0.0326783		6.07668	1.22218	0.201126	0.181929		5.39584	0.145717	0.0270054	0.0707451
255947_at	At1g22040	Unique		4.72427	0.0676002	0.0142383	0.0550351		8.60892	0.00930067	0.00108035	0.0112023		6.23959	0.457483	0.0733193	0.1084		6.85992	0.206138	0.0300497	0.0661851
255951_at	At1g22050	Duplicate		5.88158	0.0643602	0.0109266	0.0431335		9.06927	0.0253923	0.00279981	0.0175703		6.7884	0.567773	0.0836387	0.110999		7.43933	0.0944959	0.0127022	0.0413212
255948_at	At1g22060	Unique		6.68748	0.00894508	0.00131849	0.0141426		8.24636	0.14566	0.0176636	0.0462815		7.77635	0.464594	0.0597445	0.0876518		8.34223	0.110933	0.0132978	0.0399254
255953_at	At1g22070	Duplicate		6.71751	0.087977	0.0126292	0.0441546		11.2948	0.0337067	0.00298427	0.0162547		8.38771	0.652368	0.0777766	0.0962948		8.49735	0.60893	0.0716611	0.0918332
255949_at	At1g22080	Unique		2.39625	0.000731891	0.000307398	0.0112899		5.22082	0.205491	0.0393598	0.0868275		2.42109	0.0566216	0.0233868	0.0982833		2.81129	0.0100331	0.00356885	0.0356296
255954_at	At1g22090	Unique		2.65129	0.853678	0.326392	0.34849		5.59034	2.55792	0.457561	0.286092		2.19328	0.255728	0.116596	0.230566		2.4354	0.00536029	0.00220099	0.0300624
255950_at	At1g22110	Unique		2.29328	0.00100689	0.000451439	0.0138367		5.07158	0.134733	0.0265664	0.072376		4.29279	2.03786	0.474716	0.332542		3.67534	0.0862113	0.0234567	0.0798887
255952_at	At1g22130	Duplicate		2.34919	0.000481165	0.000206153	0.00933744		4.63318	0.0977895	0.0211063	0.0674943		2.87381	2.41833	0.841507	0.541127		2.62886	0.00866666	0.00329673	0.0354126
255960_at	At1g22140	Unique		9.09687	0.0592118	0.00650573	0.0267493		11.2542	0.0440875	0.00391741	0.018657		9.72055	0.161808	0.0166459	0.0413817		10.5969	0.0669925	0.00632192	0.0244251
255958_at	At1g22150	Duplicate		2.17044	0.000464795	0.000215546	0.00993305		3.21309	0.092885	0.0289083	0.0948526		2.99036	1.25899	0.421016	0.375221		2.51507	0.0150055	0.00596626	0.0487053
255957_at	At1g22160	Unique		4.97761	0.357248	0.0721337	0.120078		8.2527	0.704682	0.085388	0.101719		8.07452	3.06542	0.379641	0.216834		8.27272	0.756015	0.0913864	0.105103
255924_at	At1g22170	Duplicate		2.99255	0.0712258	0.0226394	0.0891819		7.49456	0.0729731	0.00973681	0.0360442		6.42873	1.97249	0.306825	0.218465		5.84928	0.143816	0.0245869	0.0648337
255923_at	At1g22180	Unique		2.93964	0.159555	0.053616	0.135882		9.3063	0.023052	0.00247704	0.0163147		6.29209	2.55868	0.40665	0.254222		6.15552	1.20533	0.195813	0.178356
255926_at	At1g22190	Duplicate		5.83318	0.540458	0.092679	0.12603		8.57386	0.105993	0.0123623	0.0379719		7.92742	2.87026	0.362067	0.213712		8.84238	1.43346	0.162112	0.135401
255925_at	At1g22200	Duplicate		7.93958	0.0110847	0.00140838	0.0132606		10.6474	0.0112322	0.00105493	0.00995386		8.96386	0.360884	0.0402599	0.0670175		9.50293	0.0532977	0.00560855	0.0242939
255922_at	At1g22210	Unique		2.56179	0.00142706	0.000563244	0.0147461		4.8302	0.034157	0.00707154	0.0382626		3.21485	0.154015	0.0479074	0.122073		3.63158	0.0299159	0.00823769	0.0476272
255921_at	At1g22240	Unique		2.15297	0.000346217	0.000161697	0.00864244		6.16222	0.0219362	0.0035598	0.024035		3.73734	1.28517	0.343873	0.303332		2.9735	0.0457858	0.015398	0.0719611
255968_at	At1g22270	Duplicate		8.76314	0.061373	0.0070686	0.0282702		10.7554	0.603647	0.056125	0.0722378		8.65152	0.483959	0.0559392	0.0804103		8.59937	0.202627	0.023563	0.0523458
255964_at	At1g22275	Duplicate		3.63742	0.00653084	0.00182382	0.0222173		4.35671	0.309856	0.0711215	0.127768		4.27371	0.229566	0.0537159	0.112111		4.31151	0.0397668	0.00922342	0.0462521
255967_at	At1g22280	Duplicate		7.6242	0.00912195	0.00123268	0.0125271		11.1953	0.04037	0.00360596	0.017947		9.51225	0.517786	0.0544336	0.075647		9.79426	0.163411	0.0166843	0.0412732
255965_at	At1g22290	Unique		2.07486	0.000409001	0.00019814	0.00974707		5.57172	0.0651667	0.011696	0.0458167		2.35366	0.0351124	0.0149182	0.0796134		2.71022	0.00316431	0.00116754	0.0207556
255966_at	At1g22300	Duplicate		11.0341	0.0204357	0.00185233	0.0129556		12.6581	0.0104268	0.000823725	0.0080669		11.7864	0.253293	0.0214902	0.0427002		11.8254	0.0765848	0.0064763	0.0234022
255963_at	At1g22310	Unique		3.58527	0.0299651	0.00818	0.0482821		7.00853	0.0293201	0.00418349	0.0244318		5.93439	0.127951	0.021561	0.0602763		6.72646	0.071711	0.010661	0.0398113
255969_at	At1g22330	Unique		6.43268	0.0642388	0.0101537	0.039401		5.89337	0.154724	0.026254	0.0667445		6.51209	0.980193	0.150519	0.152032		6.52861	1.21777	0.186529	0.169029
255962_at	At1g22335	Unique		6.57576	0.211739	0.0328838	0.0699769		7.05826	0.155668	0.0220547	0.0558987		6.36614	1.39167	0.218605	0.185307		6.04253	1.81737	0.300762	0.223101
255961_at	At1g22340	Tandem Duplicate		3.13325	0.00123096	0.000397111	0.0111977		6.89086	0.199167	0.0289031	0.0647643		4.8094	0.460948	0.0958432	0.141168		5.75966	0.0599513	0.0104088	0.0425111
255942_at	At1g22360	Tandem Duplicate		6.78221	0.133829	0.0200447	0.0539391		8.36384	0.358192	0.0428262	0.071557		7.88305	2.97096	0.376879	0.218652		8.59683	0.397779	0.0462704	0.0733639
255943_at	At1g22370	Tandem Duplicate		4.66516	0.23348	0.0510712	0.103576		8.02403	0.0798768	0.0099547	0.0352223		5.86051	1.97776	0.337472	0.239967		7.51239	1.9627	0.261261	0.186487
261923_at	At1g22380	Tandem Duplicate		2.19444	0.0462014	0.0216226	0.0979499		5.95931	0.129387	0.0217117	0.06036		4.7071	3.82054	0.811655	0.415249		5.1548	0.133506	0.0258993	0.0708823
261934_at	At1g22400	Tandem Duplicate		6.39836	0.757976	0.123173	0.136069		9.76299	0.150516	0.015417	0.0397382		7.3527	3.91911	0.533017	0.269245		8.44359	1.17798	0.139511	0.128541
261933_at	At1g22410	Duplicate		10.5129	0.0778189	0.00740469	0.0265351		12.3013	0.441151	0.0358621	0.0539935		10.9983	0.678754	0.0617143	0.0749083		10.9495	0.119274	0.0108931	0.0315413
261932_at	At1g22420	Unique		1.99704	0.000416702	0.000209618	0.0102218		4.41477	0.0687174	0.0155653	0.059378		1.89623	0.0139679	0.00736616	0.0623269		1.93833	0.00223586	0.0011535	0.0243946
261931_at	At1g22430	Tandem Duplicate		8.50959	0.0440035	0.00509221	0.024651		9.72332	0.0912206	0.00938163	0.0310622		7.3521	2.43937	0.331792	0.212436		8.96786	0.266854	0.0297567	0.0576034
261930_at	At1g22440	Tandem Duplicate		2.36087	0.122188	0.0515852	0.148061		5.37612	0.56241	0.104613	0.139495		4.39066	6.70229	1.52649	0.589633		3.66535	0.362544	0.0989112	0.164272
261939_at	At1g22450	Unique		10.1826	0.0123001	0.00120861	0.0108917		11.6223	0.0127059	0.00109323	0.00969862		10.2323	0.207464	0.0202754	0.0445142		10.3154	0.0301651	0.00292428	0.0168371
261929_at	At1g22460	Unique		2.77821	0.00188383	0.000683145	0.0156227		5.73621	0.0244173	0.00425669	0.027241		4.15568	1.83486	0.441531	0.325957		3.04688	0.0298163	0.00978583	0.0566723
261928_at	At1g22480	Duplicate		2.37123	0.00025482	0.000108404	0.00673197		5.02363	1.19094	0.237068	0.217234		3.70797	4.24145	1.14388	0.55542		2.80157	0.0399353	0.0142546	0.0713308
261941_at	At1g22490	Duplicate		2.69987	0.00185687	0.000695936	0.0159605		7.42789	0.0454277	0.00611583	0.0286943		4.94556	0.398741	0.0806261	0.127682		4.90515	0.129086	0.0263164	0.0732465
261927_at	At1g22500	Unique		2.08217	0.00032753	0.000167783	0.00869178		7.55749	0.34354	0.0454569	0.0775552		3.92561	5.31985	1.35516	0.587547		6.01504	1.72536	0.286841	0.218374
261938_at	At1g22510	Duplicate		4.25434	0.00289183	0.000684275	0.0126402		8.90324	0.0134896	0.00151513	0.0130452		6.92579	0.937606	0.135379	0.139811		6.40684	0.42513	0.0663557	0.101769
261940_at	At1g22520	Duplicate		9.08167	0.11264	0.0123863	0.0369556		10.1837	0.0404598	0.003973	0.0197518		9.17665	0.180131	0.0196293	0.0462498		9.49234	0.0568266	0.00598658	0.0251132
261926_at	At1g22530	Unique		9.19226	0.109676	0.0120494	0.0360274		9.29773	0.169862	0.0182692	0.0443273		9.53972	2.13855	0.224174	0.153294		9.94435	1.10681	0.111301	0.105794
261925_at	At1g22540	Tandem Duplicate		6.3647	0.0909454	0.014151	0.0473819		9.62321	0.0147957	0.0015375	0.01264		6.6361	0.773059	0.116493	0.132493		7.85815	0.343057	0.0436562	0.0745354
261924_at	At1g22550	Tandem Duplicate		5.8398	0.418699	0.071819	0.110803		8.62356	0.433683	0.0502905	0.0763659		6.27764	2.49865	0.398024	0.251801		6.93332	0.327537	0.047241	0.0825447
261937_at	At1g22570	Tandem Duplicate		3.87154	0.444382	0.112278	0.172185		10.3468	0.347892	0.033623	0.0570052		6.01653	4.31074	0.716483	0.345088		7.87631	2.40441	0.305272	0.196871
261942_at	At1g22590	Unique		5.0677	3.81623	0.739441	0.385484		4.53425	5.45591	1.20327	0.515143		6.95906	3.89032	0.55903	0.283428		8.83372	0.370868	0.0419832	0.0689392
261936_at	At1g22600	Unique		2.03985	0.00204595	0.00100293	0.0221743		5.83178	0.0581072	0.00996389	0.0413346		2.55123	4.22048	1.6543	0.805253		2.10727	0.00938731	0.00445471	0.0459779
261935_at	At1g22610	Duplicate		8.34977	0.015122	0.00180209	0.0147275		10.0429	0.0182047	0.00181269	0.0134348		9.48852	0.57416	0.060511	0.0798579		9.82602	0.160581	0.0163424	0.040782
264197_at	At1g22620	Unique		6.29751	0.0723218	0.0114038	0.0427037		8.53084	0.0555791	0.00651507	0.0276353		6.93121	0.152595	0.0220156	0.0563586		7.61974	0.187318	0.0245833	0.0568002
264201_at	At1g22630	Unique		8.66636	0.160181	0.0183875	0.0461815		9.82724	0.0449897	0.00457807	0.0215837		7.26769	3.90396	0.537167	0.271867		9.81206	0.367179	0.0374212	0.061756
264210_at	At1g22640	Unique		4.94717	0.25776	0.0507794	0.102624		8.14495	0.0892534	0.0109581	0.0366795		6.75715	1.637	0.242262	0.189348		7.79684	0.929367	0.119198	0.123645
264200_at	At1g22650	Duplicate		4.03175	0.0849639	0.02121	0.0722975		7.44271	0.162268	0.0218022	0.0541234		5.62493	1.34682	0.239438	0.206319		6.48316	0.572683	0.0883339	0.116727
264212_at	At1g22660	Unique		5.24209	0.045097	0.00845524	0.0405107		7.7534	0.122925	0.0158543	0.0452197		6.10545	0.282318	0.0462404	0.0870266		7.1744	0.0624178	0.00870006	0.0348232
264196_at	At1g22670	Duplicate		2.21459	0.000290543	0.000132103	0.00769681		6.28396	0.00876562	0.00139492	0.014899		2.80358	0.0748947	0.0267139	0.097614		2.48762	0.039925	0.0160495	0.0803227
264195_at	At1g22690	Unique		10.0033	0.377745	0.0375624	0.0614408		10.2241	0.0995524	0.00973707	0.0308605		6.9261	10.7203	1.54782	0.472732		11.4533	2.2036	0.192398	0.129609
264199_at	At1g22700	Unique		9.3157	0.0151389	0.00161528	0.0132079		10.9375	0.0130282	0.00119114	0.0104357		8.58314	1.72417	0.200879	0.152983		9.91467	0.115523	0.0116517	0.0342812
264204_at	At1g22710	Duplicate		9.67626	0.062095	0.00647941	0.0257526		11.4552	0.0180445	0.00157523	0.0117265		9.94172	2.5668	0.258185	0.161152		11.2823	0.149169	0.0132215	0.0342326
264194_at	At1g22720	Unique		2.83419	0.000719751	0.000258898	0.00946589		5.91812	0.0233565	0.0039466	0.0258238		3.67361	0.112637	0.0306611	0.0913582		3.1252	0.0510292	0.0163283	0.0722823
264206_at	At1g22730	Unique		6.39546	0.0692015	0.0109984	0.0411326		8.83102	0.050773	0.00574939	0.0255156		7.59813	0.680303	0.0895356	0.108554		8.00047	0.0719406	0.00899204	0.0335252
264209_at	At1g22740	Duplicate		6.51597	0.174326	0.026935	0.064077		8.737	0.102293	0.011708	0.0366066		6.64333	1.69465	0.25509	0.195954		6.98966	0.896067	0.128199	0.13543
264207_at	At1g22750	Unique		8.70676	0.0480193	0.00555178	0.0251681		11.6588	0.0112381	0.000963913	0.00909269		8.92043	1.40637	0.157657	0.132942		9.97748	0.120287	0.0120558	0.0347606
264208_at	At1g22760	Duplicate		2.22141	0.000253632	0.000114927	0.00716926		6.65854	0.0291436	0.00437687	0.0256385		3.64946	3.0084	0.824341	0.475269		3.41515	0.0765198	0.022406	0.0809986
264211_at	At1g22770	Unique		3.48448	0.494688	0.123806	0.20185		10.9821	0.0659296	0.00600339	0.0233806		7.55322	0.963184	0.12752	0.129934		8.01726	2.48455	0.3099	0.196606
264203_at	At1g22780	Duplicate		12.4214	0.0164568	0.00133038	0.0103277		12.5367	0.0285606	0.00227817	0.0134804		11.98	0.952408	0.0794998	0.0814619		12.3391	0.164743	0.0133513	0.0328943
264205_at	At1g22790	Unique		4.89894	0.130211	0.0266699	0.0736582		8.77472	0.0117785	0.00134232	0.0123684		7.08622	0.305709	0.0431413	0.078026		7.20236	0.0913377	0.0126816	0.0419614
264198_at	At1g22800	Unique		5.74048	0.0756258	0.013228	0.0479056		7.92766	0.0879044	0.0110883	0.037399		7.19136	0.385655	0.0536276	0.0863552		7.13869	0.068559	0.00960386	0.0366787
264202_at	At1g22810	Duplicate		1.6449	0.00023614	0.000143903	0.00934212		6.52124	0.19183	0.0294162	0.0671627		1.81291	0.365138	0.20141	0.333313		1.98494	1.15412	0.581437	0.541225
264749_at	At1g22830	Duplicate		2.4732	0.000488718	0.000197926	0.0089386		6.05253	0.0142411	0.00235291	0.0197167		3.61445	0.100563	0.0278226	0.087736		4.01302	0.153714	0.0383038	0.0976979
264727_at	At1g22840	Duplicate		11.6154	0.0170651	0.00147154	0.0112466		12.8621	0.0484679	0.00376827	0.0171165		11.9033	0.289365	0.0243097	0.0451915		11.7663	0.0855616	0.00727175	0.0248599
264728_at	At1g22850	Unique		9.13666	0.0714422	0.00781884	0.0292543		11.0402	0.155902	0.0141213	0.0357642		9.33446	1.16883	0.125216	0.115821		10.9035	0.262345	0.0240607	0.0469756
264776_at	At1g22860	Unique		4.77034	0.0286348	0.00603725	0.035473		7.68033	0.0573914	0.00747253	0.0311921		6.80425	0.137252	0.0201715	0.0544476		7.33718	0.0484494	0.00660328	0.0299996
264750_at	At1g22870	Duplicate		3.11067	0.00590342	0.00186885	0.0247001		7.43657	0.140351	0.0188731	0.0503774		5.85699	0.165856	0.0283177	0.0695331		6.2175	0.0635205	0.0102164	0.040536
264775_at	At1g22880	Duplicate		1.88058	0.000213092	0.000113823	0.00776231		6.47866	0.0470388	0.00726058	0.0334767		4.28689	0.761085	0.177538	0.203505		3.37081	0.088825	0.0263513	0.0884166
264725_at	At1g22885	Tandem Duplicate		7.71491	0.137539	0.0181046	0.0480709		9.10607	0.069929	0.00767938	0.0290401		8.92279	0.775013	0.0868577	0.0986629		9.62844	0.127153	0.0132059	0.0370345
264774_at	At1g22890	Tandem Duplicate		4.44979	0.459543	0.1045	0.152343		10.1755	0.287129	0.0282177	0.0526603		7.2256	5.2024	0.719996	0.315666		10.0285	0.506652	0.0505212	0.0709772
264773_at	At1g22900	Unique		2.70026	0.31181	0.112614	0.206795		7.36955	0.437453	0.0593596	0.089748		3.80332	1.04892	0.27579	0.269282		5.55065	0.207604	0.0374017	0.0820868
257413_at	At1g22910	Duplicate		5.80857	0.093671	0.0161522	0.0526906		9.21314	0.0586581	0.00636679	0.0262879		7.29851	0.98751	0.135303	0.136156		7.42018	0.17868	0.0240803	0.056967
264724_at	At1g22920	Duplicate		7.76457	0.0239954	0.00310177	0.0199502		10.0188	0.0793193	0.00791703	0.0281108		8.56273	0.184078	0.0214976	0.0501059		8.74271	0.0315875	0.00361301	0.0203288
264772_at	At1g22930	Unique		6.23166	0.0653851	0.0103824	0.0410332		8.77144	0.192282	0.0219213	0.0499917		8.85473	1.76855	0.19973	0.150188		9.66768	0.349301	0.0361307	0.0611332
264771_at	At1g22940	Unique		7.1267	0.300025	0.0416879	0.0768582		9.42925	0.164258	0.0174201	0.042982		7.25314	0.154984	0.0213678	0.0542771		8.0363	0.0613657	0.00763606	0.0308252
264723_at	At1g22960	Unique		3.10046	0.0296734	0.00970384	0.0555594		7.22653	0.0559687	0.0077449	0.0327373		5.02241	0.328976	0.0655016	0.114201		6.0731	0.0952272	0.0156802	0.0508125
264722_at	At1g22970	Tandem Duplicate		6.71155	0.0610858	0.00884401	0.0368254		8.68413	0.0124988	0.00143927	0.0128738		7.74407	0.319172	0.041215	0.072953		7.95479	0.0546864	0.00687465	0.0293975
257412_at	At1g22980	Tandem Duplicate		2.41402	0.00465541	0.00193384	0.0282643		6.62197	0.0775277	0.0117077	0.0420476		3.34205	0.101599	0.0304002	0.0953744		3.43222	0.126158	0.0367569	0.103486
264726_at	At1g22985	Duplicate		2.68244	0.0046273	0.00174063	0.025359		7.73451	0.0671893	0.00868696	0.0335133		5.53726	1.10805	0.200108	0.190101		6.26939	0.200166	0.0319275	0.0713624
264729_at	At1g22990	Duplicate		2.46717	0.00229958	0.000939515	0.0194368		6.0763	0.305286	0.0502421	0.0909314		5.43687	7.00117	1.28772	0.486672		4.38742	2.88826	0.658305	0.387355
264721_at	At1g23000	Unique		3.67475	0.0582102	0.0155218	0.0656557		5.31496	0.161456	0.0303776	0.0756009		5.78335	2.82843	0.489064	0.290799		6.04007	0.339089	0.05614	0.0964085
264752_at	At1g23010	Duplicate		2.00197	0.000731183	0.000365725	0.0135069		5.16896	0.142071	0.0274854	0.0729204		5.34137	6.11394	1.14464	0.462922		4.45047	0.966038	0.217064	0.220847
264751_at	At1g23020	Duplicate		3.73565	1.32406	0.344192	0.308026		8.75195	1.3403	0.153143	0.132281		6.55965	3.15636	0.481177	0.27084		8.50948	0.483331	0.0567991	0.0816995
264770_at	At1g23030	Duplicate		7.56259	0.121087	0.0161916	0.0460128		8.37397	0.030934	0.00369407	0.0210033		8.14297	1.8203	0.223543	0.165687		8.323	1.33157	0.159987	0.138644
264894_at	At1g23040	Unique		5.40516	0.0370397	0.00689783	0.0356061		8.59222	0.439223	0.0511187	0.0771324		8.07505	3.28725	0.407087	0.224528		7.9301	0.785069	0.0989987	0.111731
264889_at	At1g23050	Unique		2.17659	0.000322127	0.000148919	0.00824587		5.3607	0.277845	0.0518299	0.0983286		4.81607	2.52129	0.523516	0.3297		5.38054	0.287495	0.0534324	0.0996528
264902_at	At1g23060	Unique		2.79884	0.00131835	0.000476962	0.0129729		6.86661	0.16951	0.0246861	0.0599591		5.33432	3.33735	0.625638	0.34247		4.78607	0.274553	0.0573651	0.10948
264888_at	At1g23070	Unique		2.64826	0.000930067	0.000353802	0.0115159		4.6594	0.0722495	0.0155062	0.0576882		3.68041	3.78546	1.02854	0.528645		3.98799	0.248901	0.0624127	0.125101
264900_at	At1g23080	Duplicate		7.13265	0.0932157	0.0126028	0.0428049		9.92217	0.0879615	0.00886514	0.0298909		7.34766	2.02914	0.276161	0.193868		8.61734	0.790884	0.0917782	0.103201
264901_at	At1g23090	Duplicate		8.09166	0.108964	0.013611	0.0407948		9.01763	0.0966334	0.0107161	0.0344724		7.79034	3.54855	0.455507	0.241807		8.38562	0.545247	0.0650217	0.0880565
264895_at	At1g23100	Duplicate		5.93061	0.264671	0.0455929	0.0867469		7.76887	0.0531448	0.00684074	0.0296737		6.30249	0.777826	0.123416	0.139936		6.66306	0.418213	0.0627659	0.0970566
264887_at	At1g23120	Unique		3.27021	0.0828983	0.0254385	0.0880434		6.9991	0.538116	0.0768836	0.104808		5.8375	2.5851	0.442844	0.275431		5.56847	0.220821	0.0396556	0.0843887
264899_at	At1g23130	Duplicate		7.71442	0.72815	0.0845357	0.110613		11.5225	4.43268	0.384697	0.18272		7.76888	18.1158	2.33184	0.54786		13.2101	0.028241	0.00213784	0.0127214
264893_at	At1g23140	Duplicate		3.30784	0.198585	0.0552547	0.134719		8.6812	0.275036	0.0316818	0.0604108		5.92297	2.59797	0.438625	0.27213		4.55954	0.574601	0.126022	0.16625
264892_at	At1g23160	Duplicate		2.7065	0.000621738	0.000231467	0.00921288		3.55177	0.258611	0.0728119	0.143179		3.08907	0.267749	0.0866762	0.167508		3.46936	0.0133209	0.00383959	0.0332673
264890_at	At1g23180	Unique		7.77564	0.0530362	0.00677923	0.0296176		9.35675	0.0353217	0.003775	0.0200861		7.41263	0.386005	0.052074	0.0838155		8.28019	0.300224	0.0362581	0.0661732
264903_at	At1g23190	Duplicate		8.99753	0.0407569	0.00456501	0.0224377		10.9768	0.032666	0.0029759	0.0164653		9.72334	0.517779	0.0532511	0.0740042		10.623	0.219421	0.0206553	0.0440953
264891_at	At1g23200	Unique		2.27855	0.00083861	0.000377172	0.0127093		6.8846	0.0434999	0.00631844	0.0302946		5.25122	6.12034	1.16551	0.471116		4.09498	0.951551	0.23237	0.238212
264898_at	At1g23205	Duplicate		9.09458	0.560171	0.0621595	0.0822959		8.18707	0.266586	0.0325619	0.0630653		5.87422	3.50435	0.596564	0.318679		7.45838	1.80659	0.242222	0.180212
264896_at	At1g23210	Duplicate		1.89727	0.000338987	0.000179655	0.00970424		2.85147	0.168406	0.0590594	0.143916		2.38957	1.10712	0.463314	0.440329		2.23938	0.0128054	0.00571829	0.0505324
264897_at	At1g23220	Unique		8.59033	0.02779	0.00322332	0.0194059		10.7072	0.0147249	0.00137523	0.0113331		8.90024	0.565391	0.0635254	0.0844837		9.24059	0.066163	0.00716003	0.027836
263037_at	At1g23230	Unique		5.32262	0.0310163	0.00581399	0.0330879		8.31586	0.0509337	0.00612489	0.0271391		7.25242	0.170396	0.0234951	0.0569177		7.78964	0.102792	0.013196	0.0411587
262987_at	At1g23240	Unique		2.22572	0.000463805	0.000210782	0.00967602		5.55236	0.0431714	0.00777533	0.0374215		3.80156	3.26929	0.859986	0.475625		3.86354	0.0323248	0.00836662	0.0465353
263011_at	At1g23250	Unique		2.2376	0.00146775	0.000664266	0.0171216		4.38077	0.195993	0.0447393	0.101058		3.91095	1.26301	0.322943	0.287357		3.9851	0.0720259	0.0180738	0.0673449
262990_at	At1g23260	Duplicate		7.4809	0.0848317	0.0112303	0.0389337		10.0381	0.0213645	0.00212835	0.0145612		9.2048	0.149418	0.0162326	0.041994		8.87364	0.075249	0.00848006	0.0309135
263038_at	At1g23270	Unique		1.9963	0.000367342	0.000185124	0.00960085		3.195	0.0611609	0.0191427	0.0774044		2.2369	0.0202564	0.00905553	0.0636258		2.35288	0.0104256	0.00443101	0.0433961
263039_at	At1g23280	Unique		6.5435	0.0369443	0.00561973	0.0293741		7.97915	0.138835	0.0173998	0.0466975		7.40164	0.542543	0.0733003	0.0995151		8.13417	0.243754	0.0299667	0.0606963
262985_s_at	At1g23290	Duplicate		13.2148	0.0115114	0.000872582	0.00811904		13.8612	0.0153161	0.00110496	0.00892838		12.8414	0.597572	0.046535	0.0601983		13.1867	0.195556	0.0148298	0.033535
263040_at	At1g23300	Duplicate		2.90841	0.00260595	0.000910748	0.017552		4.72147	0.181627	0.0384683	0.0902636		3.05405	0.049946	0.016354	0.073177		3.72366	0.0387	0.010393	0.0528306
262988_at	At1g23310	Duplicate		13.226	0.00732692	0.000554029	0.00647193		13.3485	0.0176936	0.00132552	0.009965		11.4884	3.21834	0.280139	0.156155		13.7769	0.0570527	0.00414118	0.0173375
263041_at	At1g23320	Duplicate		1.93034	0.000364617	0.000189581	0.00989202		3.26318	0.167814	0.0514264	0.125537		2.09133	0.0113645	0.00543412	0.0509746		2.29392	0.00212924	0.000928209	0.0201156
263010_at	At1g23330	Duplicate		6.08211	0.0418526	0.00694666	0.0336362		8.48889	0.0325427	0.00383356	0.0212508		7.21409	0.633446	0.0878067	0.110325		7.76792	0.223455	0.0287663	0.0608541
263042_at	At1g23340	Duplicate		3.0676	0.0120517	0.00390716	0.0357869		5.80622	0.212415	0.036584	0.0793778		5.79797	0.266914	0.0460357	0.0891066		6.46054	0.0545388	0.00844183	0.036148
263043_at	At1g23350	Unique		2.38656	0.000278206	0.00011697	0.00698893		4.24797	0.244964	0.0576663	0.116512		3.96179	5.94372	1.50026	0.615372		2.83554	0.0388318	0.0136947	0.0694958
263044_at	At1g23360	Unique		8.29351	0.129424	0.0154193	0.043378		9.6494	0.0610853	0.00633047	0.0256134		8.20207	0.947904	0.115569	0.118702		9.47556	0.161359	0.017029	0.0423928
263012_at	At1g23370			3.49682	0.0124789	0.00359191	0.0319458		4.46412	0.526992	0.118051	0.162617		5.70061	1.63761	0.287269	0.224483		5.10418	0.133134	0.0260833	0.0714855
263013_at	At1g23380	Duplicate		2.41128	0.000595832	0.000249063	0.0101231		6.29481	0.0254718	0.00404647	0.025354		4.54929	1.26969	0.279096	0.247688		4.23333	0.269792	0.0637305	0.122697
262986_at	At1g23390	Unique		9.52428	2.12213	0.218492	0.152952		11.4691	0.341125	0.0297428	0.0509244		9.47234	2.42898	0.256429	0.164534		11.3179	2.46686	0.217961	0.138773
263014_at	At1g23400	Unique		8.34354	0.0917293	0.0108614	0.0362998		9.72726	0.0949012	0.00975621	0.0316698		7.26526	1.90277	0.2619	0.189864		9.59277	0.229522	0.0239266	0.0499423
263016_at	At1g23410	Duplicate		6.76252	0.508518	0.0768545	0.10545		7.11417	0.310609	0.0436607	0.0783399		7.52508	2.00252	0.266113	0.188052		7.73586	0.577559	0.07466	0.0982403
262989_at	At1g23420	Unique		2.05282	0.000634146	0.000312217	0.0122671		6.02305	0.0396263	0.00657912	0.0330503		3.79467	0.825213	0.217466	0.239392		3.4662	0.0292425	0.00843646	0.0493348
263015_at	At1g23430			6.6962	0.00528857	0.000801234	0.0108603		9.52068	0.0558113	0.00586212	0.0248138		9.19957	0.966889	0.105102	0.106886		10.1968	0.189099	0.0185449	0.0426461
262422_at	At1g23440	Duplicate		5.96766	0.0155273	0.00262169	0.0208807		8.79894	0.466559	0.0530244	0.0776288		7.84182	1.11566	0.14227	0.134694		8.03295	0.195121	0.0242901	0.0549892
262423_at	At1g23450	Unique		2.67302	0.000848998	0.000320283	0.0109006		4.8901	0.139546	0.0285364	0.0763907		2.81773	0.0693182	0.0246007	0.0934381		3.14038	0.0183777	0.00585206	0.0431682
265174_s_at	At1g23460	Duplicate		4.56893	0.0119477	0.00258843	0.0239237		6.918	0.247412	0.0357635	0.0719002		6.54643	0.843192	0.128802	0.140268		8.42697	0.0549311	0.00651849	0.0278124
265175_at	At1g23480	Duplicate		7.3524	0.173693	0.0240024	0.0566843		7.78697	0.0740011	0.00950319	0.0349342		6.39085	4.23391	0.662496	0.321968		7.7873	1.69758	0.217994	0.167313
265187_at	At1g23490	Duplicate		10.8374	0.0250973	0.00234125	0.014618		12.9859	0.0175008	0.00134768	0.0101872		11.3813	0.24854	0.0218377	0.0438034		11.6728	0.116531	0.00998313	0.0292446
265181_at	At1g23510	Tandem Duplicate		3.02275	0.00403335	0.00135911	0.0210102		4.36542	0.107677	0.0246658	0.0751683		3.46213	0.300806	0.0868847	0.158416		3.60424	0.0372756	0.0103422	0.0535672
265176_at	At1g23520	Tandem Duplicate		2.29665	0.00709406	0.00309662	0.0366735		4.96525	0.0350222	0.00705346	0.0376904		2.81481	1.50842	0.535888	0.436327		2.47785	0.014419	0.00581915	0.048461
265173_at	At1g23530	Unique		4.02483	0.0381061	0.0096333	0.0485009		6.71359	0.00973171	0.00144955	0.014694		4.61948	0.359177	0.0777526	0.129736		5.48292	0.0459268	0.00837634	0.039086
265178_at	At1g23540	Unique		2.39981	0.00052196	0.000219279	0.00952011		3.29141	0.176316	0.0535686	0.127575		2.72352	1.9805	0.727183	0.516722		2.61404	0.00467594	0.00178878	0.0261591
257401_at	At1g23550	Duplicate		3.11739	0.303216	0.0912336	0.176639		7.96456	0.159831	0.0200678	0.0501959		4.98791	2.13546	0.428127	0.292972		5.39162	0.753771	0.139804	0.161028
265186_at	At1g23560	Unique		3.04142	0.00458449	0.00151477	0.0222622		6.12461	0.833534	0.136096	0.149068		4.883	3.71892	0.761605	0.394931		3.89143	0.0675335	0.0173544	0.0667806
257402_at	At1g23570	Tandem Duplicate		3.32524	0.00452824	0.00137797	0.0202368		3.75769	0.349066	0.0928938	0.157229		4.28575	3.38034	0.78874	0.428996		3.85903	0.0377336	0.00977801	0.0503369
265163_at	At1g23580	Tandem Duplicate		3.18897	0.0292417	0.00926904	0.053623		5.31389	0.107224	0.0201781	0.0616217		4.09661	0.869487	0.212246	0.227618		3.78459	0.0738169	0.0195046	0.0717893
265180_at	At1g23590	Unique		2.68197	0.000831804	0.000312131	0.0107537		4.8975	0.0261598	0.00534146	0.033025		2.88942	1.01093	0.349871	0.347976		2.81055	0.0153649	0.00546689	0.0441037
265164_at	At1g23600	Duplicate		2.52391	0.00384	0.00153243	0.0245522		4.88431	0.128367	0.0262815	0.0733539		3.25154	1.39789	0.429917	0.36362		3.2911	0.0466267	0.0141675	0.0656109
265165_at	At1g23610	Unique		3.37613	0.0099621	0.00301763	0.0295636		3.27665	0.343765	0.104914	0.178937		4.78664	0.427352	0.0892803	0.136572		4.56901	0.030888	0.00676033	0.0384656
265177_at	At1g23630	Duplicate		3.40827	0.00604096	0.00180649	0.0228044		2.98978	0.474488	0.158703	0.230395		3.85691	0.665934	0.17266	0.211581		3.95828	0.0515252	0.0130171	0.057346
265166_at	At1g23640			3.48638	0.00456897	0.00134175	0.0193881		4.74854	0.0138513	0.00291696	0.0247848		3.85746	0.385885	0.100036	0.161038		4.33943	0.0491016	0.0113152	0.051064
265179_at	At1g23650	Unique		2.88743	0.0316393	0.0109721	0.061603		3.3984	0.282448	0.0831119	0.156385		3.53833	1.46658	0.414483	0.342259		3.14191	0.0385051	0.0122553	0.0624547
265185_at	At1g23670	Tandem Duplicate		2.27601	0.000866808	0.000382488	0.0129357		5.40839	0.00717839	0.00132727	0.0156655		4.22885	1.73039	0.409187	0.311064		3.31316	0.0229695	0.00693281	0.0457439
265167_at	At1g23680	Unique		3.1633	0.0129575	0.00415739	0.0359849		3.68137	0.352658	0.0957952	0.161312		4.09637	0.173762	0.0424185	0.10176		4.05766	0.0405744	0.00999947	0.0496422
257399_at	At1g23690	Duplicate		2.19694	0.000492618	0.000225564	0.0101027		5.62056	0.0232758	0.00414119	0.0271439		2.55753	1.09363	0.427612	0.408897		3.15454	0.0311073	0.00986113	0.0559107
265168_at	At1g23700	Unique		2.29348	0.000445431	0.000195385	0.0092023		5.74561	0.0166463	0.00289722	0.0224555		3.85501	0.26605	0.0690143	0.1338		4.91844	0.0562306	0.0114326	0.0482124
265184_at	At1g23710	Duplicate		3.92322	0.12092	0.0299921	0.0886352		7.57989	0.0748173	0.0098705	0.0360859		7.43378	1.49919	0.201673	0.16471		7.47958	1.41327	0.18895	0.158941
265169_x_at	At1g23720	Unique		3.02864	0.332395	0.110428	0.190362		7.2149	0.0225553	0.0031262	0.0208158		5.61187	1.90843	0.340071	0.246167		5.60938	0.229493	0.0409123	0.0854023
265170_at	At1g23730	Duplicate		2.36561	0.00773146	0.00335579	0.0371696		7.374	0.189956	0.0257603	0.0591049		5.64539	3.325	0.588977	0.323		6.01757	0.30576	0.0508112	0.0918901
265182_at	At1g23740	Unique		11.6986	0.0656301	0.00567502	0.0218986		11.6775	0.0154403	0.00132222	0.0106409		9.87586	3.89501	0.394396	0.199838		12.9389	0.276178	0.0213447	0.0406159
265183_at	At1g23750	Duplicate		6.5889	0.0950622	0.0143305	0.0467941		8.59378	0.484376	0.0563635	0.0809855		7.3493	1.49803	0.203833	0.166538		7.34176	0.157229	0.0214157	0.054009
265131_at	At1g23760	Duplicate		2.37589	0.000454812	0.000196239	0.00897616		4.43513	0.163543	0.0368744	0.091182		3.62519	2.64418	0.729392	0.448555		3.03876	0.0595308	0.0195905	0.0802924
265190_at	At1g23780	Unique		5.07111	0.826723	0.1434	0.179299		8.49312	0.929512	0.109443	0.113517		8.04034	0.356388	0.044325	0.0742484		8.63565	0.0761154	0.00881409	0.0319478
265171_at	At1g23790	Duplicate		3.31999	0.13758	0.0393509	0.111722		6.49733	0.035629	0.00548363	0.0290514		5.13946	1.53791	0.299235	0.241294		4.84864	0.143471	0.02959	0.0781201
265188_at	At1g23800	Duplicate		3.09625	0.166737	0.0494413	0.13188		8.24081	0.323039	0.0391998	0.0689695		6.29684	3.23573	0.513866	0.285669		6.36612	0.509963	0.0801057	0.112174
257400_s_at	At1g23810	Duplicate		2.73538	0.00161942	0.000598245	0.0147117		4.69436	0.0494894	0.0105423	0.0473892		3.52049	0.497913	0.141433	0.200435		3.96702	0.0183946	0.00463688	0.0341886
265172_at	At1g23820	Duplicate		10.0583	0.0310678	0.00310273	0.0175239		11.6776	0.0160373	0.00137335	0.0108446		10.3271	0.17935	0.0173669	0.0410083		10.3024	0.147755	0.0143418	0.0373108
265132_at	At1g23830	Tandem Duplicate		1.92623	0.000198487	0.00010319	0.00731404		8.73388	0.109323	0.0125171	0.0378571		4.59328	3.53425	0.769439	0.409285		5.70066	0.718158	0.125978	0.148657
265189_at	At1g23840	Tandem Duplicate		2.08177	0.000552207	0.0002669	0.0112881		9.59118	0.166037	0.0173114	0.0424845		4.5621	1.52268	0.333768	0.270483		5.95021	0.922233	0.154992	0.161394
263032_at	At1g23850	Tandem Duplicate		2.52436	0.00662497	0.00271027	0.0322434		9.3428	3.39622	0.363512	0.197252		5.12078	1.68	0.328076	0.253116		5.94539	0.49244	0.0828272	0.118031
263035_at	At1g23860	Unique		6.34702	0.0585303	0.00914246	0.0381172		9.21834	0.0194279	0.00210753	0.0151203		7.69103	0.456703	0.0593813	0.0878683		8.46347	0.0841537	0.00994317	0.0342759
263019_at	At1g23870	Duplicate		4.91326	0.420542	0.0892356	0.131988		6.08589	0.0804038	0.0132115	0.0465923		7.03573	0.970789	0.13798	0.14004		7.75503	0.94619	0.12201	0.125431
263020_at	At1g23880	Unique		3.8539	0.07881	0.0203065	0.0728435		6.50792	0.0428914	0.00659065	0.0318231		5.34479	0.350571	0.0655911	0.110779		5.87072	0.176481	0.0300613	0.071558
263036_at	At1g23890	Unique		3.65861	0.0232115	0.00624593	0.0416424		7.88881	0.0530737	0.00672772	0.0292031		6.46316	0.652439	0.100947	0.124976		6.25672	0.0844806	0.0135024	0.0464549
263021_at	At1g23910	Unique		3.66555	0.0106235	0.00295029	0.0281186		2.87696	0.40667	0.141354	0.22166		3.95329	0.245206	0.0620258	0.125258		4.09851	0.0578395	0.0141123	0.0586794
263022_s_at	At1g23940	Unique		4.22031	0.0725831	0.0170534	0.0638372		6.7052	0.107558	0.016041	0.0489114		6.14921	0.250848	0.0407935	0.081449		6.68783	0.112461	0.0168158	0.0501437
263033_s_at	At1g23950	Duplicate		6.27763	3.07095	0.457924	0.279152		9.04667	2.31094	0.255446	0.168037		8.51029	0.138024	0.0162185	0.0436549		8.86158	0.0489236	0.00552087	0.0249602
263023_at	At1g23960	Unique		5.07725	7.58381	1.58817	0.542394		5.28809	12.5254	2.3686	0.669263		9.29695	0.145267	0.0156252	0.0409961		9.78794	0.113416	0.0115873	0.0344069
263024_at	At1g23980	Unique		3.38138	0.00195681	0.000596215	0.0130822		7.43212	0.0373094	0.00502002	0.0259894		5.37052	0.105817	0.0197034	0.0605707		5.98073	0.0444111	0.0074257	0.0352364
263025_at	At1g23990			2.87396	0.0302831	0.0104808	0.0605508		4.05819	0.157293	0.0387595	0.0977289		3.45368	0.13075	0.0378581	0.104698		3.75265	0.0641248	0.0170879	0.06748
263026_at	At1g24000	Unique		2.89022	0.00276599	0.00097131	0.0181968		4.50325	0.378962	0.084153	0.136701		4.1337	0.316569	0.0765824	0.136112		4.05769	0.0425656	0.0104901	0.0508453
263027_at	At1g24010	Unique		3.11328	0.00547241	0.00177743	0.0237614		3.34655	0.219033	0.0654505	0.139849		4.12005	0.866752	0.210374	0.225967		3.87363	0.0478513	0.0123531	0.0564714
263034_at	At1g24020	Unique		10.6436	1.13646	0.106039	0.100158		12.0484	0.255059	0.0211696	0.0419172		10.1546	9.17022	0.903057	0.298212		11.7512	0.386026	0.03285	0.0528722
263028_at	At1g24030	Unique		2.22669	0.000944273	0.00042677	0.0138003		5.35726	0.517978	0.096687	0.134342		4.19085	2.01554	0.480939	0.338762		3.65633	0.135109	0.0369521	0.10053
257459_at	At1g24040	Unique		4.56809	0.0180975	0.0040277	0.0294493		8.70074	0.780411	0.0896948	0.101533		7.40762	0.502929	0.0678935	0.0957358		8.57721	0.0621248	0.007243	0.0290594
[truncated: 20,749 more rows]
