# Supplementary material for: A Role for Gene Duplication and Natural Variation of Gene Expression in the Evolution of Metabolism
Source: PLoS One. 2008 Mar 19;3(3):e1838. doi: 10.1371/journal.pone.0001838 (PMC2263126; doi:10.1371/journal.pone.0001838)
Supplement: Table S2 — Biosynthetic Pathways. List of biosynthetic pathways and genes per each pathway utilized within this manuscript. (0.20 MB XLS) [file pone.0001838.s002.xls]

## Sheet: Pathway Lists
Supplemental Table 2. Biosynthetic Pathways.
ID	Pathway	Gene
246	abscisic acid biosynthesis	AT1G30100
247	abscisic acid biosynthesis	AT1G78390
248	abscisic acid biosynthesis	AT3G14440
249	abscisic acid biosynthesis	AT3G24220
250	abscisic acid biosynthesis	AT4G18350
1277	gibberellin inactivation	AT1G30040
1278	gibberellin inactivation	AT1G50960
1279	gibberellin inactivation	AT1G78440
1280	gibberellin inactivation	AT2G34555
1281	gibberellin inactivation	AT4G21200
1415	glycolipid biosynthesis	AT2G11810
1416	glycolipid biosynthesis	AT3G11670
1417	glycolipid biosynthesis	AT4G00550
1418	glycolipid biosynthesis	AT4G31780
1419	glycolipid biosynthesis	AT5G20410
2751	triacylglycerol biosynthesis	AT1G15080
2752	triacylglycerol biosynthesis	AT2G01180
2753	triacylglycerol biosynthesis	AT2G19450
2754	triacylglycerol biosynthesis	AT3G02600
2755	triacylglycerol biosynthesis	AT3G18220
2885	tyrosine biosynthesis II	AT1G15710
2886	tyrosine biosynthesis II	AT1G69370
2887	tyrosine biosynthesis II	AT3G29200
2888	tyrosine biosynthesis II	AT5G10870
2889	tyrosine biosynthesis II	AT5G34930
2980	ureide degradation	AT1G67550
2981	ureide degradation	AT3G14730
2982	ureide degradation	AT4G04955
2983	ureide degradation	AT4G31720
2984	ureide degradation	AT5G14580
401	arginine biosynthesis III	AT1G75330
402	arginine biosynthesis III	AT1G80600
404	arginine biosynthesis III	AT3G20330
405	arginine biosynthesis III	AT3G55610
406	arginine biosynthesis III	AT4G24830
407	arginine biosynthesis III	AT5G10920
473	aspartate biosynthesis and degradation	AT1G62800
474	aspartate biosynthesis and degradation	AT2G22250
475	aspartate biosynthesis and degradation	AT2G30970
476	aspartate biosynthesis and degradation	AT4G31990
477	aspartate biosynthesis and degradation	AT5G11520
478	aspartate biosynthesis and degradation	AT5G19550
554	brassinosteroid biosynthesis II	AT2G16530
555	brassinosteroid biosynthesis II	AT2G38050
556	brassinosteroid biosynthesis II	AT3G50660
557	brassinosteroid biosynthesis II	AT3G55360
558	brassinosteroid biosynthesis II	AT5G05690
559	brassinosteroid biosynthesis II	AT5G16010
893	cytokinins degradation	AT1G75450
894	cytokinins degradation	AT2G19500
895	cytokinins degradation	AT2G41510
896	cytokinins degradation	AT3G63440
897	cytokinins degradation	AT4G29740
898	cytokinins degradation	AT5G56970
1672	isopentenyl diphosphate biosynthesis -- mevalonate-independent	AT1G63970
1673	isopentenyl diphosphate biosynthesis -- mevalonate-independent	AT2G02500
1674	isopentenyl diphosphate biosynthesis -- mevalonate-independent	AT3G21500
1676	isopentenyl diphosphate biosynthesis -- mevalonate-independent	AT4G15560
1677	isopentenyl diphosphate biosynthesis -- mevalonate-independent	AT5G11380
1678	isopentenyl diphosphate biosynthesis -- mevalonate-independent	AT5G62790
1848	mannitol degradation	AT1G67070
1850	mannitol degradation	AT2G21890
1851	mannitol degradation	AT3G02570
1852	mannitol degradation	AT4G37970
1853	mannitol degradation	AT4G37980
1854	mannitol degradation	AT4G39330
1959	NAD biosynthesis I (from aspartate)	AT1G55090
1960	NAD biosynthesis I (from aspartate)	AT2G01350
1961	NAD biosynthesis I (from aspartate)	AT2G23420
1962	NAD biosynthesis I (from aspartate)	AT4G36940
1963	NAD biosynthesis I (from aspartate)	AT5G14760
1964	NAD biosynthesis I (from aspartate)	AT5G50210
2240	polyamine biosynthesis II	AT1G23820
2241	polyamine biosynthesis II	AT1G70310
2242	polyamine biosynthesis II	AT2G16500
2243	polyamine biosynthesis II	AT4G08870
2245	polyamine biosynthesis II	AT4G34710
2246	polyamine biosynthesis II	AT5G53120
2327	salicylic acid biosynthesis	AT1G18870
2328	salicylic acid biosynthesis	AT1G74710
2329	salicylic acid biosynthesis	AT2G37040
2330	salicylic acid biosynthesis	AT3G10340
2331	salicylic acid biosynthesis	AT3G53260
2332	salicylic acid biosynthesis	AT5G04230
2693	thiamin biosynthesis	AT1G22940
2694	thiamin biosynthesis	AT2G29630
2695	thiamin biosynthesis	AT3G21500
2696	thiamin biosynthesis	AT3G24030
2697	thiamin biosynthesis	AT4G15560
2698	thiamin biosynthesis	AT5G11380
83	Camalexin	AT3G26830
84	Camalexin	AT4G39950
85	Camalexin	AT2G22330
86	Camalexin	AT2G30770
87	Camalexin	AT2G30750
88	Camalexin	AT2G45570
89	Camalexin	AT1G11610
462	asparagine biosynthesis	AT1G62800
463	asparagine biosynthesis	AT2G22250
464	asparagine biosynthesis	AT2G30970
465	asparagine biosynthesis	AT3G47340
466	asparagine biosynthesis	AT4G31990
467	asparagine biosynthesis	AT5G11520
468	asparagine biosynthesis	AT5G19550
546	brassinosteroid biosynthesis I	AT2G16530
547	brassinosteroid biosynthesis I	AT2G38050
548	brassinosteroid biosynthesis I	AT3G50660
549	brassinosteroid biosynthesis I	AT3G55360
550	brassinosteroid biosynthesis I	AT5G05690
551	brassinosteroid biosynthesis I	AT5G16010
552	brassinosteroid biosynthesis I	AT5G38970
644	carotenoid biosynthesis	AT1G08550
645	carotenoid biosynthesis	AT3G10230
646	carotenoid biosynthesis	AT4G25700
647	carotenoid biosynthesis	AT5G17230
648	carotenoid biosynthesis	AT5G52570
649	carotenoid biosynthesis	AT5G57030
650	carotenoid biosynthesis	AT5G67030
1358	glutamine biosynthesis	AT1G48470
1359	glutamine biosynthesis	AT1G66200
1360	glutamine biosynthesis	AT3G17820
1361	glutamine biosynthesis	AT3G53180
1362	glutamine biosynthesis	AT5G16570
1363	glutamine biosynthesis	AT5G35630
1364	glutamine biosynthesis	AT5G37600
1620	homoserine biosynthesis	AT1G14810
1621	homoserine biosynthesis	AT1G31230
1622	homoserine biosynthesis	AT2G19940
1623	homoserine biosynthesis	AT3G02020
1624	homoserine biosynthesis	AT4G19710
1625	homoserine biosynthesis	AT5G13280
1627	homoserine biosynthesis	AT5G21060
1628	IAA biosynthesis I	AT3G44300
1630	IAA biosynthesis I	AT3G44320
1631	IAA biosynthesis I	AT4G08790
1632	IAA biosynthesis I	AT4G32540
1633	IAA biosynthesis I	AT5G15600
1634	IAA biosynthesis I	AT5G20960
1635	IAA biosynthesis I	AT5G22300
2287	purine degradation	AT1G16350
2288	purine degradation	AT1G79470
2290	purine degradation	AT2G38280
2292	purine degradation	AT3G14150
2293	purine degradation	AT4G34890
2295	purine degradation	AT5G50530
2297	purine degradation	AT5G63490
2308	riboflavin and FMN and FAD biosynthesis	AT2G22450
2309	riboflavin and FMN and FAD biosynthesis	AT2G44050
2310	riboflavin and FMN and FAD biosynthesis	AT4G21470
2311	riboflavin and FMN and FAD biosynthesis	AT5G08340
2312	riboflavin and FMN and FAD biosynthesis	AT5G23330
2313	riboflavin and FMN and FAD biosynthesis	AT5G59750
2314	riboflavin and FMN and FAD biosynthesis	AT5G64300
2354	SAM cycle	AT1G02500
2355	SAM cycle	AT2G36880
2356	SAM cycle	AT3G03780
2357	SAM cycle	AT3G17390
2358	SAM cycle	AT3G23810
2359	SAM cycle	AT4G01850
2360	SAM cycle	AT4G13940
2362	serine biosynthesis	AT1G17745
2363	serine biosynthesis	AT1G18640
2364	serine biosynthesis	AT1G56500
2365	serine biosynthesis	AT2G17630
2366	serine biosynthesis	AT2G25870
2367	serine biosynthesis	AT3G19480
2368	serine biosynthesis	AT4G34200
2369	spermine biosynthesis I	AT1G23820
2370	spermine biosynthesis I	AT1G70310
2371	spermine biosynthesis I	AT2G16500
2372	spermine biosynthesis I	AT4G08870
2374	spermine biosynthesis I	AT4G34710
2375	spermine biosynthesis I	AT5G19530
2376	spermine biosynthesis I	AT5G53120
2959	UDP-N-acetyl-D-glucosamine biosynthesis	AT1G05610
2960	UDP-N-acetyl-D-glucosamine biosynthesis	AT1G74910
2961	UDP-N-acetyl-D-glucosamine biosynthesis	AT2G04650
2962	UDP-N-acetyl-D-glucosamine biosynthesis	AT4G30570
2963	UDP-N-acetyl-D-glucosamine biosynthesis	AT5G10240
2964	UDP-N-acetyl-D-glucosamine biosynthesis	AT5G19220
2965	UDP-N-acetyl-D-glucosamine biosynthesis	AT5G65010
3022	vitamin E biosynthesis	AT1G06570
3023	vitamin E biosynthesis	AT1G11840
3024	vitamin E biosynthesis	AT1G64970
3025	vitamin E biosynthesis	AT1G67280
3026	vitamin E biosynthesis	AT2G18950
3027	vitamin E biosynthesis	AT3G63410
3028	vitamin E biosynthesis	AT4G32770
34	Indolic Glucsoinolate	AT4G39950
35	Indolic Glucsoinolate	AT2G22330
36	Indolic Glucsoinolate	AT1G74100
37	Indolic Glucsoinolate	AT1G74090
38	Indolic Glucsoinolate	At5g60890
39	Indolic Glucsoinolate	At5g46760
40	Indolic Glucsoinolate	At2g30870
41	Indolic Glucsoinolate	At2g30860
238	trans-zeatin biosynthesis	AT1G67110
239	trans-zeatin biosynthesis	AT1G68460
240	trans-zeatin biosynthesis	AT3G19160
241	trans-zeatin biosynthesis	AT3G23630
242	trans-zeatin biosynthesis	AT3G63110
243	trans-zeatin biosynthesis	AT4G24650
244	trans-zeatin biosynthesis	AT5G19040
245	trans-zeatin biosynthesis	AT5G38450
943	dolichyl-diphosphooligosaccharide biosynthesis	AT1G16570
944	dolichyl-diphosphooligosaccharide biosynthesis	AT1G20575
945	dolichyl-diphosphooligosaccharide biosynthesis	AT1G74340
946	dolichyl-diphosphooligosaccharide biosynthesis	AT2G41490
947	dolichyl-diphosphooligosaccharide biosynthesis	AT2G47760
948	dolichyl-diphosphooligosaccharide biosynthesis	AT3G57220
949	dolichyl-diphosphooligosaccharide biosynthesis	AT4G16590
950	dolichyl-diphosphooligosaccharide biosynthesis	AT5G14850
1350	glutamate degradation II	AT1G65960
1351	glutamate degradation II	AT1G79440
1352	glutamate degradation II	AT2G38400
1353	glutamate degradation II	AT3G08860
1354	glutamate degradation II	AT3G22200
1355	glutamate degradation II	AT3G48730
1356	glutamate degradation II	AT5G17330
1357	glutamate degradation II	AT5G46180
1714	leucine degradation	AT1G03090
1715	leucine degradation	AT2G26800
1716	leucine degradation	AT3G05190
1717	leucine degradation	AT3G45300
1718	leucine degradation	AT4G34030
1719	leucine degradation	AT5G27410
1720	leucine degradation	AT5G57850
1721	leucine degradation	AT5G65780
2699	threonine biosynthesis from homoserine	AT1G08700
2700	threonine biosynthesis from homoserine	AT1G55880
2701	threonine biosynthesis from homoserine	AT1G72810
2702	threonine biosynthesis from homoserine	AT2G17265
2703	threonine biosynthesis from homoserine	AT3G10050
2704	threonine biosynthesis from homoserine	AT4G11610
2705	threonine biosynthesis from homoserine	AT4G29840
2707	threonine biosynthesis from homoserine	AT5G28030
1394	glycine biosynthesis	AT1G18640
1395	glycine biosynthesis	AT1G22020
1396	glycine biosynthesis	AT1G36370
1397	glycine biosynthesis	AT1G56500
1398	glycine biosynthesis	AT2G25870
1399	glycine biosynthesis	AT4G13890
1401	glycine biosynthesis	AT4G32520
1402	glycine biosynthesis	AT4G37930
1403	glycine biosynthesis	AT5G26780
1404	glycine degradation	AT1G11860
1405	glycine degradation	AT1G32470
1406	glycine degradation	AT1G50480
1407	glycine degradation	AT1G60990
1408	glycine degradation	AT2G26080
1409	glycine degradation	AT2G35120
1410	glycine degradation	AT2G35370
1411	glycine degradation	AT4G12130
1412	glycine degradation	AT4G33010
2062	pantothenate biosynthesis	AT1G16080
2063	pantothenate biosynthesis	AT2G40690
2064	pantothenate biosynthesis	AT2G46110
2065	pantothenate biosynthesis	AT3G05190
2066	pantothenate biosynthesis	AT3G61530
2067	pantothenate biosynthesis	AT5G27410
2068	pantothenate biosynthesis	AT5G48840
2069	pantothenate biosynthesis	AT5G57850
2070	pantothenate biosynthesis	AT5G65780
2890	tyrosine degradation	AT1G06570
2891	tyrosine degradation	AT1G11840
2892	tyrosine degradation	AT1G12050
2893	tyrosine degradation	AT1G67280
2894	tyrosine degradation	AT2G22250
2895	tyrosine degradation	AT2G24850
2896	tyrosine degradation	AT5G36160
2897	tyrosine degradation	AT5G53970
2898	tyrosine degradation	AT5G54080
2901	UDP-D-xylose biosynthesis	AT1G26570
2902	UDP-D-xylose biosynthesis	AT2G27860
2903	UDP-D-xylose biosynthesis	AT2G47650
2904	UDP-D-xylose biosynthesis	AT3G29360
2905	UDP-D-xylose biosynthesis	AT3G46440
2906	UDP-D-xylose biosynthesis	AT3G53520
2908	UDP-D-xylose biosynthesis	AT5G15490
2909	UDP-D-xylose biosynthesis	AT5G39320
2910	UDP-D-xylose biosynthesis	AT5G59290
2966	ureide biosynthesis	AT1G16350
2967	ureide biosynthesis	AT1G43940
2968	ureide biosynthesis	AT1G79470
2970	ureide biosynthesis	AT2G26230
2973	ureide biosynthesis	AT3G14150
2974	ureide biosynthesis	AT4G04955
2975	ureide biosynthesis	AT4G34890
2977	ureide biosynthesis	AT5G50530
2979	ureide biosynthesis	AT5G63490
1	Tryptophan	AT4G02610
2	Tryptophan	AT3G54640
3	Tryptophan	AT4G27070
5	Tryptophan	AT2G04400
6	Tryptophan	AT5G48220
8	Tryptophan	AT1G29410
10	Tryptophan	AT2G29690
11	Tryptophan	AT5G05730
13	Tryptophan	AT5G17990
14	Tryptophan	At5g60890
90	deoxyribose phosphate degradation	AT2G45290
91	deoxyribose phosphate degradation	AT3G60750
92	deoxyribose phosphate degradation	AT4G29570
93	deoxyribose phosphate degradation	AT4G29580
94	deoxyribose phosphate degradation	AT4G29600
95	deoxyribose phosphate degradation	AT4G29610
96	deoxyribose phosphate degradation	AT4G29620
97	deoxyribose phosphate degradation	AT4G29630
98	deoxyribose phosphate degradation	AT4G29640
99	deoxyribose phosphate degradation	AT4G29650
364	ammonia assimilation cycle	AT1G48470
365	ammonia assimilation cycle	AT1G66200
366	ammonia assimilation cycle	AT2G41220
367	ammonia assimilation cycle	AT3G17820
368	ammonia assimilation cycle	AT3G53180
369	ammonia assimilation cycle	AT5G04140
370	ammonia assimilation cycle	AT5G16570
371	ammonia assimilation cycle	AT5G35630
372	ammonia assimilation cycle	AT5G37600
373	ammonia assimilation cycle	AT5G53460
424	ascorbate biosynthesis	AT1G30560
425	ascorbate biosynthesis	AT1G67070
426	ascorbate biosynthesis	AT2G39770
427	ascorbate biosynthesis	AT2G45790
428	ascorbate biosynthesis	AT3G02570
429	ascorbate biosynthesis	AT3G47930
430	ascorbate biosynthesis	AT4G24620
431	ascorbate biosynthesis	AT4G25220
432	ascorbate biosynthesis	AT5G28840
433	ascorbate biosynthesis	AT5G42740
1254	gibberellin biosynthesis I (non C-3, non C-13 hydroxylation)	AT1G15550
1255	gibberellin biosynthesis I (non C-3, non C-13 hydroxylation)	AT1G44090
1256	gibberellin biosynthesis I (non C-3, non C-13 hydroxylation)	AT1G50960
1257	gibberellin biosynthesis I (non C-3, non C-13 hydroxylation)	AT1G60980
1258	gibberellin biosynthesis I (non C-3, non C-13 hydroxylation)	AT3G46500
1259	gibberellin biosynthesis I (non C-3, non C-13 hydroxylation)	AT4G21200
1260	gibberellin biosynthesis I (non C-3, non C-13 hydroxylation)	AT4G25420
1261	gibberellin biosynthesis I (non C-3, non C-13 hydroxylation)	AT5G07200
1262	gibberellin biosynthesis I (non C-3, non C-13 hydroxylation)	AT5G51310
1263	gibberellin biosynthesis I (non C-3, non C-13 hydroxylation)	AT5G51810
1855	menaquinone biosynthesis	AT1G18870
1856	menaquinone biosynthesis	AT1G60550
1857	menaquinone biosynthesis	AT1G65060
1858	menaquinone biosynthesis	AT1G68890
1859	menaquinone biosynthesis	AT1G74710
1861	menaquinone biosynthesis	AT3G05670
1862	menaquinone biosynthesis	AT3G26760
1863	menaquinone biosynthesis	AT3G26770
1864	menaquinone biosynthesis	AT5G36230
1865	menaquinone biosynthesis	AT5G45300
2020	nitrate assimilation pathway	AT1G37130
2021	nitrate assimilation pathway	AT1G48470
2022	nitrate assimilation pathway	AT1G66200
2023	nitrate assimilation pathway	AT1G77760
2024	nitrate assimilation pathway	AT2G15620
2025	nitrate assimilation pathway	AT3G17820
2026	nitrate assimilation pathway	AT3G53180
2027	nitrate assimilation pathway	AT5G16570
2028	nitrate assimilation pathway	AT5G35630
2029	nitrate assimilation pathway	AT5G37600
2228	polyamine biosynthesis I	AT1G23820
2229	polyamine biosynthesis I	AT1G70310
2230	polyamine biosynthesis I	AT2G16500
2231	polyamine biosynthesis I	AT3G02470
2233	polyamine biosynthesis I	AT3G25570
2234	polyamine biosynthesis I	AT4G08870
2236	polyamine biosynthesis I	AT4G34710
2237	polyamine biosynthesis I	AT5G15950
2238	polyamine biosynthesis I	AT5G18930
2239	polyamine biosynthesis I	AT5G53120
408	arginine degradation I	AT1G79440
409	arginine degradation I	AT2G16500
410	arginine degradation I	AT2G24270
411	arginine degradation I	AT2G27450
412	arginine degradation I	AT2G38400
413	arginine degradation I	AT3G08860
414	arginine degradation I	AT3G22200
415	arginine degradation I	AT3G48730
416	arginine degradation I	AT4G34710
417	arginine degradation I	AT5G08170
418	arginine degradation I	AT5G46180
1024	fatty acid biosynthesis - initial steps	AT1G36160
1025	fatty acid biosynthesis - initial steps	AT1G36180
1026	fatty acid biosynthesis - initial steps	AT1G52670
1027	fatty acid biosynthesis - initial steps	AT1G62640
1028	fatty acid biosynthesis - initial steps	AT2G17820
1029	fatty acid biosynthesis - initial steps	AT2G30200
1030	fatty acid biosynthesis - initial steps	AT2G38040
1032	fatty acid biosynthesis - initial steps	AT3G15690
1033	fatty acid biosynthesis - initial steps	AT3G56130
1034	fatty acid biosynthesis - initial steps	AT5G16390
1035	fatty acid biosynthesis - initial steps	AT5G35360
1266	gibberellin biosynthesis III (early C-13 hydroxylation)	AT1G15550
1267	gibberellin biosynthesis III (early C-13 hydroxylation)	AT1G44090
1268	gibberellin biosynthesis III (early C-13 hydroxylation)	AT1G50960
1269	gibberellin biosynthesis III (early C-13 hydroxylation)	AT1G60980
1270	gibberellin biosynthesis III (early C-13 hydroxylation)	AT1G80330
1271	gibberellin biosynthesis III (early C-13 hydroxylation)	AT3G46500
1272	gibberellin biosynthesis III (early C-13 hydroxylation)	AT4G21200
1273	gibberellin biosynthesis III (early C-13 hydroxylation)	AT4G25420
1274	gibberellin biosynthesis III (early C-13 hydroxylation)	AT5G07200
1275	gibberellin biosynthesis III (early C-13 hydroxylation)	AT5G51310
1276	gibberellin biosynthesis III (early C-13 hydroxylation)	AT5G51810
1607	homocysteine and cysteine interconversion	AT1G22410
1608	homocysteine and cysteine interconversion	AT1G33320
1609	homocysteine and cysteine interconversion	AT1G55880
1610	homocysteine and cysteine interconversion	AT1G64660
1611	homocysteine and cysteine interconversion	AT3G01120
1612	homocysteine and cysteine interconversion	AT3G10050
1613	homocysteine and cysteine interconversion	AT3G22460
1614	homocysteine and cysteine interconversion	AT3G57050
1615	homocysteine and cysteine interconversion	AT4G23600
1616	homocysteine and cysteine interconversion	AT5G28020
1617	homocysteine and cysteine interconversion	AT5G28030
1660	isoleucine degradation	AT1G04710
1661	isoleucine degradation	AT2G33150
1662	isoleucine degradation	AT3G05190
1663	isoleucine degradation	AT3G06860
1664	isoleucine degradation	AT4G16800
1665	isoleucine degradation	AT4G29010
1666	isoleucine degradation	AT5G27410
1667	isoleucine degradation	AT5G43280
1668	isoleucine degradation	AT5G48880
1669	isoleucine degradation	AT5G57850
1670	isoleucine degradation	AT5G65780
1881	methionine degradation I	AT1G02500
1882	methionine degradation I	AT1G55880
1883	methionine degradation I	AT2G36880
1884	methionine degradation I	AT3G10050
1885	methionine degradation I	AT3G17390
1886	methionine degradation I	AT3G22460
1887	methionine degradation I	AT3G23810
1888	methionine degradation I	AT4G01850
1889	methionine degradation I	AT4G13940
1890	methionine degradation I	AT5G28020
1891	methionine degradation I	AT5G28030
2247	polyamine biosynthesis III	AT1G23820
2248	polyamine biosynthesis III	AT1G70310
2249	polyamine biosynthesis III	AT2G16500
2250	polyamine biosynthesis III	AT2G27450
2251	polyamine biosynthesis III	AT3G02470
2253	polyamine biosynthesis III	AT3G25570
2254	polyamine biosynthesis III	AT4G34710
2255	polyamine biosynthesis III	AT5G08170
2256	polyamine biosynthesis III	AT5G15950
2257	polyamine biosynthesis III	AT5G18930
2258	polyamine biosynthesis III	AT5G53120
374	arginine biosynthesis	AT1G75330
375	arginine biosynthesis	AT1G80600
376	arginine biosynthesis	AT2G19940
377	arginine biosynthesis	AT2G22910
378	arginine biosynthesis	AT2G48140
380	arginine biosynthesis	AT3G20330
381	arginine biosynthesis	AT3G57560
382	arginine biosynthesis	AT4G24830
383	arginine biosynthesis	AT4G30490
384	arginine biosynthesis	AT4G37670
385	arginine biosynthesis	AT5G10920
386	arginine biosynthesis	AT5G63120
531	biotin biosynthesis II	AT1G08630
532	biotin biosynthesis II	AT2G38400
533	biotin biosynthesis II	AT2G43360
534	biotin biosynthesis II	AT3G04520
535	biotin biosynthesis II	AT3G08860
536	biotin biosynthesis II	AT3G22200
537	biotin biosynthesis II	AT3G48730
539	biotin biosynthesis II	AT4G36480
540	biotin biosynthesis II	AT5G04620
541	biotin biosynthesis II	AT5G46180
542	biotin biosynthesis II	AT5G57590
543	biotin biosynthesis II	AT5G57600
1805	lipoxygenase pathway	AT1G13280
1806	lipoxygenase pathway	AT1G17420
1807	lipoxygenase pathway	AT1G55020
1808	lipoxygenase pathway	AT1G67560
1809	lipoxygenase pathway	AT1G72520
1810	lipoxygenase pathway	AT3G01420
1811	lipoxygenase pathway	AT3G22400
1812	lipoxygenase pathway	AT3G25760
1814	lipoxygenase pathway	AT3G25780
1815	lipoxygenase pathway	AT3G45140
1816	lipoxygenase pathway	AT4G15440
1817	lipoxygenase pathway	AT5G42650
2315	ribose degradation	AT1G49350
2316	ribose degradation	AT1G71100
2317	ribose degradation	AT2G01290
2318	ribose degradation	AT2G45290
2319	ribose degradation	AT3G04790
2320	ribose degradation	AT3G04880
2321	ribose degradation	AT3G60750
2322	ribose degradation	AT4G27600
2323	ribose degradation	AT4G28706
2324	ribose degradation	AT5G43910
2325	ribose degradation	AT5G44520
2326	ribose degradation	AT5G55700
15	Glucosinolate Breakdown	AT1G54040
17	Glucosinolate Breakdown	AT5G25980
18	Glucosinolate Breakdown	AT3g14210
20	Glucosinolate Breakdown	At1g47600
22	Glucosinolate Breakdown	At1g51490
24	Glucosinolate Breakdown	At1g54010
25	Glucosinolate Breakdown	At1g54020
26	Glucosinolate Breakdown	At3g14220
27	Glucosinolate Breakdown	At1g54030
30	Glucosinolate Breakdown	At3g16390
31	Glucosinolate Breakdown	At2g33070
32	Glucosinolate Breakdown	At5g48180
33	Glucosinolate Breakdown	At3g07720
387	arginine biosynthesis II (acetyl cycle)	AT1G75330
388	arginine biosynthesis II (acetyl cycle)	AT1G80600
389	arginine biosynthesis II (acetyl cycle)	AT2G19940
390	arginine biosynthesis II (acetyl cycle)	AT2G22910
391	arginine biosynthesis II (acetyl cycle)	AT2G37500
392	arginine biosynthesis II (acetyl cycle)	AT2G48140
394	arginine biosynthesis II (acetyl cycle)	AT3G20330
395	arginine biosynthesis II (acetyl cycle)	AT3G57560
396	arginine biosynthesis II (acetyl cycle)	AT4G24830
397	arginine biosynthesis II (acetyl cycle)	AT4G30490
398	arginine biosynthesis II (acetyl cycle)	AT4G37670
399	arginine biosynthesis II (acetyl cycle)	AT5G10920
400	arginine biosynthesis II (acetyl cycle)	AT5G63120
859	cyanate degradation	AT1G08065
860	cyanate degradation	AT1G08080
861	cyanate degradation	AT1G23730
862	cyanate degradation	AT1G58180
863	cyanate degradation	AT1G70410
864	cyanate degradation	AT2G28210
865	cyanate degradation	AT3G01500
866	cyanate degradation	AT3G52720
867	cyanate degradation	AT4G20990
869	cyanate degradation	AT4G33580
870	cyanate degradation	AT5G04180
871	cyanate degradation	AT5G14740
872	cyanate degradation	AT5G56330
899	de novo biosynthesis of pyrimidine deoxyribonucleotides	AT2G16370
900	de novo biosynthesis of pyrimidine deoxyribonucleotides	AT2G21790
901	de novo biosynthesis of pyrimidine deoxyribonucleotides	AT3G06200
902	de novo biosynthesis of pyrimidine deoxyribonucleotides	AT3G23580
903	de novo biosynthesis of pyrimidine deoxyribonucleotides	AT3G46940
904	de novo biosynthesis of pyrimidine deoxyribonucleotides	AT3G60180
905	de novo biosynthesis of pyrimidine deoxyribonucleotides	AT4G09320
906	de novo biosynthesis of pyrimidine deoxyribonucleotides	AT4G11010
907	de novo biosynthesis of pyrimidine deoxyribonucleotides	AT4G23900
908	de novo biosynthesis of pyrimidine deoxyribonucleotides	AT4G25280
911	de novo biosynthesis of pyrimidine deoxyribonucleotides	AT5G35170
913	de novo biosynthesis of pyrimidine deoxyribonucleotides	AT5G59440
914	de novo biosynthesis of pyrimidine deoxyribonucleotides	AT5G63310
1241	GDP-L-fucose biosynthesis I (from GDP-D-mannose)	AT1G73250
1242	GDP-L-fucose biosynthesis I (from GDP-D-mannose)	AT1G78570
1243	GDP-L-fucose biosynthesis I (from GDP-D-mannose)	AT2G28760
1244	GDP-L-fucose biosynthesis I (from GDP-D-mannose)	AT2G45310
1245	GDP-L-fucose biosynthesis I (from GDP-D-mannose)	AT3G23820
1246	GDP-L-fucose biosynthesis I (from GDP-D-mannose)	AT3G51160
1247	GDP-L-fucose biosynthesis I (from GDP-D-mannose)	AT4G00110
1248	GDP-L-fucose biosynthesis I (from GDP-D-mannose)	AT4G12250
1249	GDP-L-fucose biosynthesis I (from GDP-D-mannose)	AT4G20460
1250	GDP-L-fucose biosynthesis I (from GDP-D-mannose)	AT4G30440
1251	GDP-L-fucose biosynthesis I (from GDP-D-mannose)	AT4G33360
1252	GDP-L-fucose biosynthesis I (from GDP-D-mannose)	AT5G44480
1253	GDP-L-fucose biosynthesis I (from GDP-D-mannose)	AT5G66280
1699	leucine biosynthesis	AT1G18500
1700	leucine biosynthesis	AT1G74040
1701	leucine biosynthesis	AT1G80560
1702	leucine biosynthesis	AT2G05710
1703	leucine biosynthesis	AT2G17130
1704	leucine biosynthesis	AT3G05190
1706	leucine biosynthesis	AT4G26970
1707	leucine biosynthesis	AT4G35260
1708	leucine biosynthesis	AT4G35650
1709	leucine biosynthesis	AT4G35830
1711	leucine biosynthesis	AT5G27410
1712	leucine biosynthesis	AT5G57850
1713	leucine biosynthesis	AT5G65780
1866	methionine biosynthesis	AT1G08700
1867	methionine biosynthesis	AT1G33320
1868	methionine biosynthesis	AT1G64660
1869	methionine biosynthesis	AT2G17265
1870	methionine biosynthesis	AT3G01120
1871	methionine biosynthesis	AT3G03780
1872	methionine biosynthesis	AT3G22740
1873	methionine biosynthesis	AT3G25900
1874	methionine biosynthesis	AT3G57050
1875	methionine biosynthesis	AT3G63250
1876	methionine biosynthesis	AT4G11610
1877	methionine biosynthesis	AT4G23600
1880	methionine biosynthesis	AT5G20980
2030	non-oxidative branch of the pentose phosphate pathway	AT1G12230
2031	non-oxidative branch of the pentose phosphate pathway	AT1G63290
2032	non-oxidative branch of the pentose phosphate pathway	AT1G71100
2033	non-oxidative branch of the pentose phosphate pathway	AT2G01290
2034	non-oxidative branch of the pentose phosphate pathway	AT2G45290
2035	non-oxidative branch of the pentose phosphate pathway	AT3G01850
2036	non-oxidative branch of the pentose phosphate pathway	AT3G04790
2037	non-oxidative branch of the pentose phosphate pathway	AT3G04880
2038	non-oxidative branch of the pentose phosphate pathway	AT3G60750
2039	non-oxidative branch of the pentose phosphate pathway	AT5G13420
2040	non-oxidative branch of the pentose phosphate pathway	AT5G44520
2041	non-oxidative branch of the pentose phosphate pathway	AT5G55700
2042	non-oxidative branch of the pentose phosphate pathway	AT5G61410
2259	polyisoprenoid biosynthesis	AT1G60600
2260	polyisoprenoid biosynthesis	AT1G79280
2261	polyisoprenoid biosynthesis	AT2G17570
2262	polyisoprenoid biosynthesis	AT2G34630
2263	polyisoprenoid biosynthesis	AT2G44520
2264	polyisoprenoid biosynthesis	AT3G02780
2265	polyisoprenoid biosynthesis	AT3G11950
2266	polyisoprenoid biosynthesis	AT4G17190
2267	polyisoprenoid biosynthesis	AT4G23660
2268	polyisoprenoid biosynthesis	AT5G16440
2269	polyisoprenoid biosynthesis	AT5G47770
2270	polyisoprenoid biosynthesis	AT5G58770
2271	polyisoprenoid biosynthesis	AT5G60500
1644	isoleucine biosynthesis	AT1G58230
1645	isoleucine biosynthesis	AT2G27980
1646	isoleucine biosynthesis	AT2G31810
1647	isoleucine biosynthesis	AT3G05190
1648	isoleucine biosynthesis	AT3G48560
1649	isoleucine biosynthesis	AT3G58610
1651	isoleucine biosynthesis	AT4G16340
1652	isoleucine biosynthesis	AT5G01320
1654	isoleucine biosynthesis	AT5G10860
1655	isoleucine biosynthesis	AT5G16290
1656	isoleucine biosynthesis	AT5G27410
1657	isoleucine biosynthesis	AT5G54960
1658	isoleucine biosynthesis	AT5G57850
1659	isoleucine biosynthesis	AT5G65780
1921	methylglyoxal degradation	AT1G06130
1922	methylglyoxal degradation	AT1G08110
1923	methylglyoxal degradation	AT1G11840
1924	methylglyoxal degradation	AT1G15380
1925	methylglyoxal degradation	AT1G53580
1926	methylglyoxal degradation	AT1G55950
1927	methylglyoxal degradation	AT1G67280
1928	methylglyoxal degradation	AT1G80160
1929	methylglyoxal degradation	AT2G28420
1930	methylglyoxal degradation	AT2G31350
1931	methylglyoxal degradation	AT2G32090
1932	methylglyoxal degradation	AT2G43430
1933	methylglyoxal degradation	AT3G10850
1934	methylglyoxal degradation	AT5G57040
2986	valine biosynthesis	AT1G58230
2987	valine biosynthesis	AT2G27980
2988	valine biosynthesis	AT2G31810
2989	valine biosynthesis	AT3G05190
2990	valine biosynthesis	AT3G48560
2991	valine biosynthesis	AT3G58610
2993	valine biosynthesis	AT4G16340
2994	valine biosynthesis	AT5G01320
2996	valine biosynthesis	AT5G10860
2997	valine biosynthesis	AT5G16290
2998	valine biosynthesis	AT5G27410
2999	valine biosynthesis	AT5G54960
3000	valine biosynthesis	AT5G57850
3001	valine biosynthesis	AT5G65780
67	Flavonol	AT5G13930
68	Flavonol	AT3G55120
69	Flavonol	AT5G08640
70	Flavonol	AT1G61720
71	Flavonol	AT3G51240
72	Flavonol	AT5G07990
74	Flavonol	AT5G42800
75	Flavonol	AT3G59030
76	Flavonol	AT5G17220
77	Flavonol	At2g36790
78	Flavonol	At4g34138
79	Flavonol	At4g34135
80	Flavonol	At5g17050
81	Flavonol	At5g17030
82	Flavonol	At1g30530
222	ent-kaurene biosynthesis	AT1G49530
223	ent-kaurene biosynthesis	AT1G79460
224	ent-kaurene biosynthesis	AT2G18620
225	ent-kaurene biosynthesis	AT2G18640
226	ent-kaurene biosynthesis	AT2G23800
227	ent-kaurene biosynthesis	AT3G14510
229	ent-kaurene biosynthesis	AT3G20160
230	ent-kaurene biosynthesis	AT3G29420
231	ent-kaurene biosynthesis	AT3G29430
232	ent-kaurene biosynthesis	AT3G32040
233	ent-kaurene biosynthesis	AT3G59380
234	ent-kaurene biosynthesis	AT4G02780
235	ent-kaurene biosynthesis	AT4G36810
236	ent-kaurene biosynthesis	AT4G38460
237	ent-kaurene biosynthesis	AT5G40280
1820	lysine biosynthesis	AT1G14810
1821	lysine biosynthesis	AT1G31230
1823	lysine biosynthesis	AT2G19940
1824	lysine biosynthesis	AT2G44040
1825	lysine biosynthesis	AT2G45440
1826	lysine biosynthesis	AT3G02020
1827	lysine biosynthesis	AT3G14390
1828	lysine biosynthesis	AT3G53580
1830	lysine biosynthesis	AT3G60880
1831	lysine biosynthesis	AT4G19710
1832	lysine biosynthesis	AT4G35250
1833	lysine biosynthesis	AT4G38220
1835	lysine biosynthesis	AT5G13280
1837	lysine biosynthesis	AT5G46180
1838	lysine biosynthesis	AT5G52100
2400	starch degradation	AT1G03310
2401	starch degradation	AT1G69830
2402	starch degradation	AT1G76130
2403	starch degradation	AT2G32290
2404	starch degradation	AT2G45880
2405	starch degradation	AT3G23920
2406	starch degradation	AT4G00490
2407	starch degradation	AT4G15210
2408	starch degradation	AT4G17090
2409	starch degradation	AT4G25000
2411	starch degradation	AT5G04360
2412	starch degradation	AT5G18670
2413	starch degradation	AT5G45300
2414	starch degradation	AT5G55700
2415	starch degradation	AT5G64860
2676	tetrahydrofolate biosynthesis II	AT1G15130
2677	tetrahydrofolate biosynthesis II	AT1G63680
2678	tetrahydrofolate biosynthesis II	AT1G69190
2679	tetrahydrofolate biosynthesis II	AT2G16370
2680	tetrahydrofolate biosynthesis II	AT2G21550
2681	tetrahydrofolate biosynthesis II	AT2G28880
2682	tetrahydrofolate biosynthesis II	AT3G07270
2683	tetrahydrofolate biosynthesis II	AT3G10160
2684	tetrahydrofolate biosynthesis II	AT3G11750
2686	tetrahydrofolate biosynthesis II	AT3G55630
2687	tetrahydrofolate biosynthesis II	AT4G30000
2689	tetrahydrofolate biosynthesis II	AT5G05980
2690	tetrahydrofolate biosynthesis II	AT5G41480
2691	tetrahydrofolate biosynthesis II	AT5G57850
2692	tetrahydrofolate biosynthesis II	AT5G62980
762	choline biosynthesis III	AT1G13560
763	choline biosynthesis III	AT1G52570
764	choline biosynthesis III	AT1G55180
765	choline biosynthesis III	AT2G32260
766	choline biosynthesis III	AT2G42010
767	choline biosynthesis III	AT3G05630
768	choline biosynthesis III	AT3G15730
769	choline biosynthesis III	AT3G16785
770	choline biosynthesis III	AT3G25585
771	choline biosynthesis III	AT4G00240
772	choline biosynthesis III	AT4G11830
773	choline biosynthesis III	AT4G11840
774	choline biosynthesis III	AT4G11850
775	choline biosynthesis III	AT4G15130
776	choline biosynthesis III	AT4G35790
777	choline biosynthesis III	AT5G25370
778	chorismate biosynthesis	AT1G06890
779	chorismate biosynthesis	AT1G48850
780	chorismate biosynthesis	AT1G48860
781	chorismate biosynthesis	AT1G60530
782	chorismate biosynthesis	AT2G14050
783	chorismate biosynthesis	AT2G21940
784	chorismate biosynthesis	AT2G35500
786	chorismate biosynthesis	AT3G06350
787	chorismate biosynthesis	AT3G26900
788	chorismate biosynthesis	AT3G50950
789	chorismate biosynthesis	AT4G25280
790	chorismate biosynthesis	AT4G39540
791	chorismate biosynthesis	AT5G22370
792	chorismate biosynthesis	AT5G45210
793	chorismate biosynthesis	AT5G47050
794	chorismate biosynthesis	AT5G66120
1225	GDP-D-rhamnose biosynthesis	AT1G67070
1226	GDP-D-rhamnose biosynthesis	AT1G78570
1227	GDP-D-rhamnose biosynthesis	AT2G28760
1228	GDP-D-rhamnose biosynthesis	AT2G39770
1229	GDP-D-rhamnose biosynthesis	AT2G45310
1230	GDP-D-rhamnose biosynthesis	AT2G45790
1231	GDP-D-rhamnose biosynthesis	AT3G02570
1232	GDP-D-rhamnose biosynthesis	AT3G23820
1233	GDP-D-rhamnose biosynthesis	AT3G51160
1234	GDP-D-rhamnose biosynthesis	AT4G00110
1235	GDP-D-rhamnose biosynthesis	AT4G12250
1236	GDP-D-rhamnose biosynthesis	AT4G20460
1237	GDP-D-rhamnose biosynthesis	AT4G30440
1238	GDP-D-rhamnose biosynthesis	AT4G33360
1239	GDP-D-rhamnose biosynthesis	AT5G44480
1240	GDP-D-rhamnose biosynthesis	AT5G66280
2535	superpathway of gluconate degradation	AT1G17650
2536	superpathway of gluconate degradation	AT1G64190
2537	superpathway of gluconate degradation	AT1G71100
2538	superpathway of gluconate degradation	AT1G71170
2539	superpathway of gluconate degradation	AT1G71180
2540	superpathway of gluconate degradation	AT2G01290
2541	superpathway of gluconate degradation	AT2G16790
2542	superpathway of gluconate degradation	AT3G02360
2543	superpathway of gluconate degradation	AT3G04790
2544	superpathway of gluconate degradation	AT3G04880
2545	superpathway of gluconate degradation	AT3G25530
2546	superpathway of gluconate degradation	AT4G20930
2547	superpathway of gluconate degradation	AT4G29120
2548	superpathway of gluconate degradation	AT5G41670
2549	superpathway of gluconate degradation	AT5G44520
2550	superpathway of gluconate degradation	AT5G55700
2658	tetrahydrofolate biosynthesis I	AT1G15130
2659	tetrahydrofolate biosynthesis I	AT1G50480
2660	tetrahydrofolate biosynthesis I	AT1G63680
2661	tetrahydrofolate biosynthesis I	AT1G69190
2662	tetrahydrofolate biosynthesis I	AT2G16370
2663	tetrahydrofolate biosynthesis I	AT2G21550
2664	tetrahydrofolate biosynthesis I	AT2G28880
2665	tetrahydrofolate biosynthesis I	AT3G07270
2666	tetrahydrofolate biosynthesis I	AT3G10160
2667	tetrahydrofolate biosynthesis I	AT3G11750
2669	tetrahydrofolate biosynthesis I	AT3G55630
2670	tetrahydrofolate biosynthesis I	AT4G30000
2672	tetrahydrofolate biosynthesis I	AT5G05980
2673	tetrahydrofolate biosynthesis I	AT5G41480
2674	tetrahydrofolate biosynthesis I	AT5G57850
2675	tetrahydrofolate biosynthesis I	AT5G62980
3002	valine degradation	AT1G06550
3003	valine degradation	AT2G30650
3004	valine degradation	AT2G30660
3005	valine degradation	AT3G05190
3006	valine degradation	AT3G06860
3007	valine degradation	AT3G24360
3008	valine degradation	AT3G25530
3009	valine degradation	AT4G16800
3010	valine degradation	AT4G20930
3011	valine degradation	AT4G29010
3012	valine degradation	AT4G31810
3013	valine degradation	AT5G27410
3014	valine degradation	AT5G43280
3015	valine degradation	AT5G57850
3016	valine degradation	AT5G65780
3017	valine degradation	AT5G65940
874	cysteine biosynthesis	AT1G55880
875	cysteine biosynthesis	AT1G55920
877	cysteine biosynthesis	AT2G17640
878	cysteine biosynthesis	AT2G34970
879	cysteine biosynthesis	AT2G43750
880	cysteine biosynthesis	AT3G03630
881	cysteine biosynthesis	AT3G04940
882	cysteine biosynthesis	AT3G10050
883	cysteine biosynthesis	AT3G13110
884	cysteine biosynthesis	AT3G59760
885	cysteine biosynthesis	AT3G61440
886	cysteine biosynthesis	AT4G14880
887	cysteine biosynthesis	AT4G29540
889	cysteine biosynthesis	AT5G28020
890	cysteine biosynthesis	AT5G28030
891	cysteine biosynthesis	AT5G38530
892	cysteine biosynthesis	AT5G56760
1006	fatty acid beta-oxidation	AT1G04710
1007	fatty acid beta-oxidation	AT1G06710
1008	fatty acid beta-oxidation	AT1G49430
1009	fatty acid beta-oxidation	AT1G64400
1010	fatty acid beta-oxidation	AT1G77590
1011	fatty acid beta-oxidation	AT2G04350
1012	fatty acid beta-oxidation	AT2G33150
1013	fatty acid beta-oxidation	AT2G35690
1014	fatty acid beta-oxidation	AT2G47240
1015	fatty acid beta-oxidation	AT3G06860
1016	fatty acid beta-oxidation	AT4G11030
1017	fatty acid beta-oxidation	AT4G16800
1018	fatty acid beta-oxidation	AT4G23850
1019	fatty acid beta-oxidation	AT4G29010
1020	fatty acid beta-oxidation	AT5G43280
1021	fatty acid beta-oxidation	AT5G48880
1022	fatty acid beta-oxidation	AT5G57710
1679	jasmonic acid biosynthesis	AT1G09400
1680	jasmonic acid biosynthesis	AT1G13280
1681	jasmonic acid biosynthesis	AT1G17420
1682	jasmonic acid biosynthesis	AT1G17990
1684	jasmonic acid biosynthesis	AT1G19640
1685	jasmonic acid biosynthesis	AT1G55020
1686	jasmonic acid biosynthesis	AT1G67560
1687	jasmonic acid biosynthesis	AT1G72520
1689	jasmonic acid biosynthesis	AT1G76690
1690	jasmonic acid biosynthesis	AT2G06050
1691	jasmonic acid biosynthesis	AT2G44810
1692	jasmonic acid biosynthesis	AT3G01420
1693	jasmonic acid biosynthesis	AT3G22400
1694	jasmonic acid biosynthesis	AT3G25760
1696	jasmonic acid biosynthesis	AT3G25780
1697	jasmonic acid biosynthesis	AT3G45140
1698	jasmonic acid biosynthesis	AT5G42650
1585	histidine biosynthesis	AT1G09795
1586	histidine biosynthesis	AT1G23320
1587	histidine biosynthesis	AT1G31860
1589	histidine biosynthesis	AT1G62800
1590	histidine biosynthesis	AT1G71920
1592	histidine biosynthesis	AT1G77670
1593	histidine biosynthesis	AT1G80360
1594	histidine biosynthesis	AT2G22250
1595	histidine biosynthesis	AT2G36230
1597	histidine biosynthesis	AT4G08040
1598	histidine biosynthesis	AT4G14910
1599	histidine biosynthesis	AT4G23590
1600	histidine biosynthesis	AT4G24670
1601	histidine biosynthesis	AT4G26900
1602	histidine biosynthesis	AT4G28420
1604	histidine biosynthesis	AT5G53970
1605	histidine biosynthesis	AT5G60540
1606	histidine biosynthesis	AT5G63890
2333	salvage pathways of purine nucleosides	AT1G16350
2334	salvage pathways of purine nucleosides	AT1G27450
2335	salvage pathways of purine nucleosides	AT1G63660
2336	salvage pathways of purine nucleosides	AT1G71750
2337	salvage pathways of purine nucleosides	AT1G79470
2338	salvage pathways of purine nucleosides	AT1G80050
2340	salvage pathways of purine nucleosides	AT2G38280
2341	salvage pathways of purine nucleosides	AT3G09820
2343	salvage pathways of purine nucleosides	AT3G14150
2344	salvage pathways of purine nucleosides	AT3G53900
2345	salvage pathways of purine nucleosides	AT4G12440
2346	salvage pathways of purine nucleosides	AT4G22570
2347	salvage pathways of purine nucleosides	AT4G34890
2348	salvage pathways of purine nucleosides	AT5G03300
2349	salvage pathways of purine nucleosides	AT5G11160
2350	salvage pathways of purine nucleosides	AT5G50530
2352	salvage pathways of purine nucleosides	AT5G51830
2353	salvage pathways of purine nucleosides	AT5G63490
2438	suberin biosynthesis	AT1G24735
2439	suberin biosynthesis	AT1G65060
2440	suberin biosynthesis	AT1G67980
2441	suberin biosynthesis	AT1G67990
2442	suberin biosynthesis	AT1G74540
2443	suberin biosynthesis	AT1G74550
2444	suberin biosynthesis	AT2G30490
2445	suberin biosynthesis	AT2G37040
2446	suberin biosynthesis	AT2G40890
2447	suberin biosynthesis	AT2G45970
2448	suberin biosynthesis	AT3G10340
2449	suberin biosynthesis	AT3G21240
2450	suberin biosynthesis	AT3G53260
2451	suberin biosynthesis	AT4G26220
2452	suberin biosynthesis	AT4G34050
2453	suberin biosynthesis	AT5G04230
2454	suberin biosynthesis	AT5G20230
2455	suberin biosynthesis	AT5G54160
1036	fatty acid elongation -- saturated	AT1G04220
1037	fatty acid elongation -- saturated	AT1G07720
1038	fatty acid elongation -- saturated	AT1G19440
1039	fatty acid elongation -- saturated	AT1G24360
1040	fatty acid elongation -- saturated	AT1G25450
1041	fatty acid elongation -- saturated	AT1G62640
1042	fatty acid elongation -- saturated	AT1G74960
1043	fatty acid elongation -- saturated	AT2G05990
1044	fatty acid elongation -- saturated	AT2G15090
1045	fatty acid elongation -- saturated	AT2G16280
1046	fatty acid elongation -- saturated	AT2G26250
1047	fatty acid elongation -- saturated	AT2G26640
1048	fatty acid elongation -- saturated	AT2G28630
1049	fatty acid elongation -- saturated	AT2G46720
1051	fatty acid elongation -- saturated	AT3G52160
1052	fatty acid elongation -- saturated	AT3G56120
1053	fatty acid elongation -- saturated	AT4G34250
1054	fatty acid elongation -- saturated	AT4G34510
1055	fatty acid elongation -- saturated	AT5G43760
2043	oxidative branch of the pentose phosphate pathway	AT1G09420
2044	oxidative branch of the pentose phosphate pathway	AT1G17650
2045	oxidative branch of the pentose phosphate pathway	AT1G24280
2046	oxidative branch of the pentose phosphate pathway	AT1G64190
2047	oxidative branch of the pentose phosphate pathway	AT1G71170
2048	oxidative branch of the pentose phosphate pathway	AT1G71180
2049	oxidative branch of the pentose phosphate pathway	AT3G02360
2050	oxidative branch of the pentose phosphate pathway	AT3G25530
2051	oxidative branch of the pentose phosphate pathway	AT3G27300
2052	oxidative branch of the pentose phosphate pathway	AT3G49360
2053	oxidative branch of the pentose phosphate pathway	AT4G20930
2054	oxidative branch of the pentose phosphate pathway	AT4G29120
2055	oxidative branch of the pentose phosphate pathway	AT5G13110
2056	oxidative branch of the pentose phosphate pathway	AT5G24400
2057	oxidative branch of the pentose phosphate pathway	AT5G24410
2058	oxidative branch of the pentose phosphate pathway	AT5G24420
2059	oxidative branch of the pentose phosphate pathway	AT5G35790
2060	oxidative branch of the pentose phosphate pathway	AT5G40760
2061	oxidative branch of the pentose phosphate pathway	AT5G41670
2193	photosynthesis, light reaction	AT1G06680
2194	photosynthesis, light reaction	AT1G30380
2195	photosynthesis, light reaction	AT1G44575
2196	photosynthesis, light reaction	AT1G55670
2197	photosynthesis, light reaction	AT1G67740
2198	photosynthesis, light reaction	AT1G79040
2199	photosynthesis, light reaction	AT4G12800
2200	photosynthesis, light reaction	AT4G28750
2201	photosynthesis, light reaction	AT5G64040
2202	photosynthesis, light reaction	PSAA
2203	photosynthesis, light reaction	PSAB
2204	photosynthesis, light reaction	PSAC
2206	photosynthesis, light reaction	PSBA
2207	photosynthesis, light reaction	PSBB
2208	photosynthesis, light reaction	PSBC
2209	photosynthesis, light reaction	PSBD
2210	photosynthesis, light reaction	PSBE
2211	photosynthesis, light reaction	PSBH
2212	photosynthesis, light reaction	PSBI
2381	starch biosynthesis	AT1G05610
2382	starch biosynthesis	AT1G23190
2383	starch biosynthesis	AT1G27680
2384	starch biosynthesis	AT1G30560
2385	starch biosynthesis	AT1G70730
2386	starch biosynthesis	AT2G21590
2387	starch biosynthesis	AT2G36390
2388	starch biosynthesis	AT2G39930
2389	starch biosynthesis	AT3G20440
2390	starch biosynthesis	AT4G09020
2391	starch biosynthesis	AT4G24620
2392	starch biosynthesis	AT4G25220
2393	starch biosynthesis	AT4G39210
2394	starch biosynthesis	AT5G03650
2395	starch biosynthesis	AT5G17530
2396	starch biosynthesis	AT5G19220
2397	starch biosynthesis	AT5G42740
2398	starch biosynthesis	AT5G48300
2399	starch biosynthesis	AT5G51820
1082	formylTHF biosynthesis I	AT1G22020
1083	formylTHF biosynthesis I	AT1G36370
1084	formylTHF biosynthesis I	AT1G50480
1085	formylTHF biosynthesis I	AT1G63680
1086	formylTHF biosynthesis I	AT2G16370
1087	formylTHF biosynthesis I	AT2G21550
1088	formylTHF biosynthesis I	AT2G35120
1089	formylTHF biosynthesis I	AT2G35370
1090	formylTHF biosynthesis I	AT2G44160
1091	formylTHF biosynthesis I	AT3G03780
1092	formylTHF biosynthesis I	AT3G10160
1093	formylTHF biosynthesis I	AT3G54660
1094	formylTHF biosynthesis I	AT3G55630
1096	formylTHF biosynthesis I	AT4G13890
1098	formylTHF biosynthesis I	AT4G32520
1100	formylTHF biosynthesis I	AT4G37930
1101	formylTHF biosynthesis I	AT5G05980
1102	formylTHF biosynthesis I	AT5G13050
1104	formylTHF biosynthesis I	AT5G26780
1105	formylTHF biosynthesis I	AT5G41480
1935	mevalonate pathway	AT1G31910
1936	mevalonate pathway	AT1G60600
1938	mevalonate pathway	AT1G76490
1939	mevalonate pathway	AT1G79280
1940	mevalonate pathway	AT2G38700
1941	mevalonate pathway	AT2G44520
1942	mevalonate pathway	AT3G02660
1943	mevalonate pathway	AT3G02780
1944	mevalonate pathway	AT3G11950
1945	mevalonate pathway	AT3G54250
1946	mevalonate pathway	AT4G11820
1947	mevalonate pathway	AT4G17190
1948	mevalonate pathway	AT4G23660
1949	mevalonate pathway	AT4G31130
1950	mevalonate pathway	AT5G16440
1951	mevalonate pathway	AT5G27450
1952	mevalonate pathway	AT5G33250
1953	mevalonate pathway	AT5G47720
1954	mevalonate pathway	AT5G47770
1955	mevalonate pathway	AT5G48230
2417	sterol biosynthesis	AT1G11680
2418	sterol biosynthesis	AT1G20050
2419	sterol biosynthesis	AT1G20330
2420	sterol biosynthesis	AT1G50430
2421	sterol biosynthesis	AT1G58440
2422	sterol biosynthesis	AT1G76090
2423	sterol biosynthesis	AT2G07050
2424	sterol biosynthesis	AT2G22830
2425	sterol biosynthesis	AT3G02580
2426	sterol biosynthesis	AT3G19820
2427	sterol biosynthesis	AT3G45130
2428	sterol biosynthesis	AT3G52940
2429	sterol biosynthesis	AT4G34640
2430	sterol biosynthesis	AT4G34650
2431	sterol biosynthesis	AT4G37760
2432	sterol biosynthesis	AT5G13710
2433	sterol biosynthesis	AT5G24140
2434	sterol biosynthesis	AT5G24150
2436	sterol biosynthesis	AT5G24160
2437	sterol biosynthesis	AT5G50375
2456	sucrose biosynthesis	AT1G04920
2457	sucrose biosynthesis	AT1G51420
2458	sucrose biosynthesis	AT1G73370
2459	sucrose biosynthesis	AT1G74910
2460	sucrose biosynthesis	AT2G04650
2461	sucrose biosynthesis	AT2G35840
2462	sucrose biosynthesis	AT3G03250
2463	sucrose biosynthesis	AT3G43190
2464	sucrose biosynthesis	AT3G52340
2465	sucrose biosynthesis	AT3G54270
2466	sucrose biosynthesis	AT4G02280
2467	sucrose biosynthesis	AT4G10120
2468	sucrose biosynthesis	AT4G30570
2469	sucrose biosynthesis	AT5G11110
2470	sucrose biosynthesis	AT5G17310
2471	sucrose biosynthesis	AT5G19220
2472	sucrose biosynthesis	AT5G20280
2473	sucrose biosynthesis	AT5G20830
2474	sucrose biosynthesis	AT5G37180
2475	sucrose biosynthesis	AT5G49190
1058	formylTHF biosynthesis	AT1G22020
1059	formylTHF biosynthesis	AT1G31220
1060	formylTHF biosynthesis	AT1G36370
1061	formylTHF biosynthesis	AT1G50480
1062	formylTHF biosynthesis	AT1G66520
1063	formylTHF biosynthesis	AT2G16370
1064	formylTHF biosynthesis	AT2G21550
1065	formylTHF biosynthesis	AT2G35120
1066	formylTHF biosynthesis	AT2G35370
1067	formylTHF biosynthesis	AT2G44160
1068	formylTHF biosynthesis	AT3G10160
1069	formylTHF biosynthesis	AT3G54660
1070	formylTHF biosynthesis	AT3G55630
1072	formylTHF biosynthesis	AT4G13890
1074	formylTHF biosynthesis	AT4G17360
1075	formylTHF biosynthesis	AT4G32520
1077	formylTHF biosynthesis	AT4G37930
1078	formylTHF biosynthesis	AT5G05980
1079	formylTHF biosynthesis	AT5G26780
1080	formylTHF biosynthesis	AT5G41480
1081	formylTHF biosynthesis	AT5G47435
1564	glyoxylate cycle	AT1G04410
1565	glyoxylate cycle	AT1G53240
1566	glyoxylate cycle	AT2G05710
1567	glyoxylate cycle	AT2G22780
1568	glyoxylate cycle	AT2G42790
1569	glyoxylate cycle	AT2G44350
1570	glyoxylate cycle	AT3G15020
1571	glyoxylate cycle	AT3G21720
1572	glyoxylate cycle	AT3G47520
1573	glyoxylate cycle	AT3G58740
1574	glyoxylate cycle	AT3G58750
1575	glyoxylate cycle	AT3G60100
1576	glyoxylate cycle	AT3G61070
1577	glyoxylate cycle	AT4G13430
1578	glyoxylate cycle	AT4G26970
1579	glyoxylate cycle	AT4G35830
1580	glyoxylate cycle	AT5G03860
1581	glyoxylate cycle	AT5G09660
1582	glyoxylate cycle	AT5G43330
1583	glyoxylate cycle	AT5G56720
1584	glyoxylate cycle	AT5G58330
2074	phenylalanine biosynthesis II	AT1G08250
2075	phenylalanine biosynthesis II	AT1G11790
2076	phenylalanine biosynthesis II	AT1G27980
2077	phenylalanine biosynthesis II	AT1G69370
2078	phenylalanine biosynthesis II	AT1G71920
2080	phenylalanine biosynthesis II	AT1G77670
2081	phenylalanine biosynthesis II	AT1G80360
2082	phenylalanine biosynthesis II	AT2G22250
2083	phenylalanine biosynthesis II	AT2G24850
2084	phenylalanine biosynthesis II	AT2G27820
2085	phenylalanine biosynthesis II	AT3G07630
2086	phenylalanine biosynthesis II	AT3G29200
2087	phenylalanine biosynthesis II	AT3G44720
2088	phenylalanine biosynthesis II	AT4G08040
2089	phenylalanine biosynthesis II	AT4G23590
2090	phenylalanine biosynthesis II	AT4G28420
2091	phenylalanine biosynthesis II	AT4G34200
2092	phenylalanine biosynthesis II	AT5G10870
2093	phenylalanine biosynthesis II	AT5G22630
2094	phenylalanine biosynthesis II	AT5G36160
2095	phenylalanine biosynthesis II	AT5G53970
2476	sucrose degradation	AT1G23190
2477	sucrose degradation	AT1G30560
2478	sucrose degradation	AT1G50390
2479	sucrose degradation	AT1G70730
2480	sucrose degradation	AT1G73370
2481	sucrose degradation	AT1G74910
2482	sucrose degradation	AT2G04650
2483	sucrose degradation	AT3G03250
2484	sucrose degradation	AT3G43190
2485	sucrose degradation	AT4G02280
2486	sucrose degradation	AT4G24620
2487	sucrose degradation	AT4G25220
2488	sucrose degradation	AT4G30570
2489	sucrose degradation	AT5G17310
2490	sucrose degradation	AT5G17530
2491	sucrose degradation	AT5G19220
2492	sucrose degradation	AT5G20830
2493	sucrose degradation	AT5G37180
2494	sucrose degradation	AT5G42740
2495	sucrose degradation	AT5G49190
2496	sucrose degradation	AT5G51820
2708	threonine degradation	AT1G06130
2709	threonine degradation	AT1G08110
2710	threonine degradation	AT1G11840
2711	threonine degradation	AT1G15380
2712	threonine degradation	AT1G23740
2713	threonine degradation	AT1G49670
2714	threonine degradation	AT1G53580
2715	threonine degradation	AT1G55950
2716	threonine degradation	AT1G67280
2717	threonine degradation	AT1G80160
2718	threonine degradation	AT2G28420
2719	threonine degradation	AT2G31350
2720	threonine degradation	AT2G32090
2721	threonine degradation	AT2G43430
2722	threonine degradation	AT3G10850
2723	threonine degradation	AT3G15090
2724	threonine degradation	AT3G43670
2725	threonine degradation	AT3G56460
2726	threonine degradation	AT4G13010
2727	threonine degradation	AT5G57040
2728	threonine degradation	AT5G63620
952	dTDP-L-rhamnose biosynthesis	AT1G17890
953	dTDP-L-rhamnose biosynthesis	AT1G47290
954	dTDP-L-rhamnose biosynthesis	AT1G50450
955	dTDP-L-rhamnose biosynthesis	AT1G63000
956	dTDP-L-rhamnose biosynthesis	AT1G78570
957	dTDP-L-rhamnose biosynthesis	AT2G26260
958	dTDP-L-rhamnose biosynthesis	AT2G28760
959	dTDP-L-rhamnose biosynthesis	AT2G33630
960	dTDP-L-rhamnose biosynthesis	AT2G34850
961	dTDP-L-rhamnose biosynthesis	AT2G43420
962	dTDP-L-rhamnose biosynthesis	AT2G45310
963	dTDP-L-rhamnose biosynthesis	AT2G47650
964	dTDP-L-rhamnose biosynthesis	AT3G23820
965	dTDP-L-rhamnose biosynthesis	AT3G53320
967	dTDP-L-rhamnose biosynthesis	AT4G00110
968	dTDP-L-rhamnose biosynthesis	AT4G00560
969	dTDP-L-rhamnose biosynthesis	AT4G12250
970	dTDP-L-rhamnose biosynthesis	AT4G20460
971	dTDP-L-rhamnose biosynthesis	AT4G30440
972	dTDP-L-rhamnose biosynthesis	AT4G33360
974	dTDP-L-rhamnose biosynthesis	AT5G44480
975	dTDP-L-rhamnose biosynthesis	AT5G66280
2729	trehalose biosynthesis	AT1G06410
2730	trehalose biosynthesis	AT1G16980
2731	trehalose biosynthesis	AT1G17000
2732	trehalose biosynthesis	AT1G22210
2733	trehalose biosynthesis	AT1G23870
2734	trehalose biosynthesis	AT1G35910
2735	trehalose biosynthesis	AT1G60140
2736	trehalose biosynthesis	AT1G68020
2737	trehalose biosynthesis	AT1G70290
2738	trehalose biosynthesis	AT1G78090
2739	trehalose biosynthesis	AT1G78580
2740	trehalose biosynthesis	AT2G18700
2741	trehalose biosynthesis	AT2G22190
2742	trehalose biosynthesis	AT4G12430
2743	trehalose biosynthesis	AT4G17770
2744	trehalose biosynthesis	AT4G22590
2745	trehalose biosynthesis	AT4G24040
2746	trehalose biosynthesis	AT4G27550
2747	trehalose biosynthesis	AT4G39770
2748	trehalose biosynthesis	AT5G10100
2749	trehalose biosynthesis	AT5G51460
2750	trehalose biosynthesis	AT5G65140
43	Aliphatic Glucosinolate	AT4G03060
44	Aliphatic Glucosinolate	AT4G03050
45	Aliphatic Glucosinolate	At2g25450
46	Aliphatic Glucosinolate	At5g23010
47	Aliphatic Glucosinolate	At5g23020
48	Aliphatic Glucosinolate	AT1G16410
50	Aliphatic Glucosinolate	AT4G13770
51	Aliphatic Glucosinolate	AT4G31500
52	Aliphatic Glucosinolate	AT2G20610
53	Aliphatic Glucosinolate	AT1G24100
54	Aliphatic Glucosinolate	AT1G18590
55	Aliphatic Glucosinolate	at1g62570
56	Aliphatic Glucosinolate	at1g62560
57	Aliphatic Glucosinolate	at1g62540
58	Aliphatic Glucosinolate	at1G65860
59	Aliphatic Glucosinolate	At4g12030
60	Aliphatic Glucosinolate	At3g03190
61	Aliphatic Glucosinolate	At3g58990
62	Aliphatic Glucosinolate	At4g13430
63	Aliphatic Glucosinolate	At2g43100
64	Aliphatic Glucosinolate	At2g31790
65	Aliphatic Glucosinolate	At1g31180
66	Aliphatic Glucosinolate	At3g19710
1367	glyceraldehyde 3-phosphate degradation	AT1G09780
1368	glyceraldehyde 3-phosphate degradation	AT1G10760
1369	glyceraldehyde 3-phosphate degradation	AT1G12900
1370	glyceraldehyde 3-phosphate degradation	AT1G13410
1371	glyceraldehyde 3-phosphate degradation	AT1G13440
1373	glyceraldehyde 3-phosphate degradation	AT1G42970
1374	glyceraldehyde 3-phosphate degradation	AT1G56190
1375	glyceraldehyde 3-phosphate degradation	AT1G74030
1376	glyceraldehyde 3-phosphate degradation	AT1G78040
1377	glyceraldehyde 3-phosphate degradation	AT1G79530
1378	glyceraldehyde 3-phosphate degradation	AT1G79550
1379	glyceraldehyde 3-phosphate degradation	AT2G15420
1380	glyceraldehyde 3-phosphate degradation	AT2G29560
1381	glyceraldehyde 3-phosphate degradation	AT2G36530
1382	glyceraldehyde 3-phosphate degradation	AT3G04120
1383	glyceraldehyde 3-phosphate degradation	AT3G08590
1384	glyceraldehyde 3-phosphate degradation	AT3G12780
1385	glyceraldehyde 3-phosphate degradation	AT3G15180
1386	glyceraldehyde 3-phosphate degradation	AT3G20040
1387	glyceraldehyde 3-phosphate degradation	AT3G26650
1389	glyceraldehyde 3-phosphate degradation	AT3G53780
1392	glyceraldehyde 3-phosphate degradation	AT4G09520
1393	glyceraldehyde 3-phosphate degradation	AT4G15530
2124	phospholipid biosynthesis	AT1G13560
2125	phospholipid biosynthesis	AT1G15080
2126	phospholipid biosynthesis	AT1G62430
2127	phospholipid biosynthesis	AT1G68000
2128	phospholipid biosynthesis	AT1G78620
2129	phospholipid biosynthesis	AT2G01180
2130	phospholipid biosynthesis	AT2G39290
2131	phospholipid biosynthesis	AT2G45150
2132	phospholipid biosynthesis	AT3G02600
2133	phospholipid biosynthesis	AT3G18220
2134	phospholipid biosynthesis	AT3G25585
2135	phospholipid biosynthesis	AT3G45040
2136	phospholipid biosynthesis	AT3G55030
2137	phospholipid biosynthesis	AT3G60620
2138	phospholipid biosynthesis	AT4G04870
2139	phospholipid biosynthesis	AT4G16700
2140	phospholipid biosynthesis	AT4G22340
2141	phospholipid biosynthesis	AT4G25970
2142	phospholipid biosynthesis	AT4G26770
2143	phospholipid biosynthesis	AT4G38570
2144	phospholipid biosynthesis	AT5G04490
2145	phospholipid biosynthesis	AT5G57190
2146	phospholipid biosynthesis	AT5G58560
915	de novo biosynthesis of pyrimidine ribonucleotides	AT1G30820
917	de novo biosynthesis of pyrimidine ribonucleotides	AT2G34890
918	de novo biosynthesis of pyrimidine ribonucleotides	AT2G35390
919	de novo biosynthesis of pyrimidine ribonucleotides	AT2G48140
920	de novo biosynthesis of pyrimidine ribonucleotides	AT3G10030
921	de novo biosynthesis of pyrimidine ribonucleotides	AT3G12670
923	de novo biosynthesis of pyrimidine ribonucleotides	AT3G14150
924	de novo biosynthesis of pyrimidine ribonucleotides	AT3G17810
926	de novo biosynthesis of pyrimidine ribonucleotides	AT3G18680
928	de novo biosynthesis of pyrimidine ribonucleotides	AT3G60180
929	de novo biosynthesis of pyrimidine ribonucleotides	AT4G02120
930	de novo biosynthesis of pyrimidine ribonucleotides	AT4G09320
931	de novo biosynthesis of pyrimidine ribonucleotides	AT4G11010
932	de novo biosynthesis of pyrimidine ribonucleotides	AT4G12440
933	de novo biosynthesis of pyrimidine ribonucleotides	AT4G20320
934	de novo biosynthesis of pyrimidine ribonucleotides	AT4G22570
935	de novo biosynthesis of pyrimidine ribonucleotides	AT4G22930
936	de novo biosynthesis of pyrimidine ribonucleotides	AT4G23900
937	de novo biosynthesis of pyrimidine ribonucleotides	AT4G30490
938	de novo biosynthesis of pyrimidine ribonucleotides	AT5G23300
939	de novo biosynthesis of pyrimidine ribonucleotides	AT5G61410
940	de novo biosynthesis of pyrimidine ribonucleotides	AT5G63120
941	de novo biosynthesis of pyrimidine ribonucleotides	AT5G63310
942	de novo biosynthesis of pyrimidine ribonucleotides	AT5G67220
979	ethylene biosynthesis from methionine	AT1G01480
980	ethylene biosynthesis from methionine	AT1G02500
981	ethylene biosynthesis from methionine	AT1G62800
982	ethylene biosynthesis from methionine	AT1G62960
983	ethylene biosynthesis from methionine	AT1G71920
985	ethylene biosynthesis from methionine	AT1G77670
986	ethylene biosynthesis from methionine	AT1G80360
987	ethylene biosynthesis from methionine	AT2G22810
988	ethylene biosynthesis from methionine	AT2G36880
989	ethylene biosynthesis from methionine	AT2G47120
990	ethylene biosynthesis from methionine	AT3G17390
991	ethylene biosynthesis from methionine	AT3G49700
993	ethylene biosynthesis from methionine	AT4G01850
994	ethylene biosynthesis from methionine	AT4G08040
995	ethylene biosynthesis from methionine	AT4G11280
996	ethylene biosynthesis from methionine	AT4G23590
997	ethylene biosynthesis from methionine	AT4G26200
998	ethylene biosynthesis from methionine	AT4G28420
999	ethylene biosynthesis from methionine	AT4G37770
1001	ethylene biosynthesis from methionine	AT5G28360
1002	ethylene biosynthesis from methionine	AT5G51690
1003	ethylene biosynthesis from methionine	AT5G53970
1004	ethylene biosynthesis from methionine	AT5G64330
1005	ethylene biosynthesis from methionine	AT5G65800
1894	methionine salvage pathway	AT1G01480
1895	methionine salvage pathway	AT1G02500
1896	methionine salvage pathway	AT1G62800
1897	methionine salvage pathway	AT1G62960
1898	methionine salvage pathway	AT1G71920
1900	methionine salvage pathway	AT1G77670
1901	methionine salvage pathway	AT1G80360
1902	methionine salvage pathway	AT2G22810
1903	methionine salvage pathway	AT2G36880
1904	methionine salvage pathway	AT2G47120
1905	methionine salvage pathway	AT3G17390
1906	methionine salvage pathway	AT3G49700
1908	methionine salvage pathway	AT4G01850
1909	methionine salvage pathway	AT4G08040
1910	methionine salvage pathway	AT4G11280
1911	methionine salvage pathway	AT4G23590
1912	methionine salvage pathway	AT4G26200
1913	methionine salvage pathway	AT4G28420
1914	methionine salvage pathway	AT4G37770
1916	methionine salvage pathway	AT5G28360
1917	methionine salvage pathway	AT5G51690
1918	methionine salvage pathway	AT5G53970
1919	methionine salvage pathway	AT5G64330
1920	methionine salvage pathway	AT5G65800
434	ascorbate glutathione cycle	AT1G07890
436	ascorbate glutathione cycle	AT1G19570
437	ascorbate glutathione cycle	AT1G63940
438	ascorbate glutathione cycle	AT1G75270
439	ascorbate glutathione cycle	AT1G77490
440	ascorbate glutathione cycle	AT2G29990
441	ascorbate glutathione cycle	AT2G41680
442	ascorbate glutathione cycle	AT3G09640
443	ascorbate glutathione cycle	AT3G09940
444	ascorbate glutathione cycle	AT3G24170
445	ascorbate glutathione cycle	AT3G27820
446	ascorbate glutathione cycle	AT3G29200
447	ascorbate glutathione cycle	AT3G44190
448	ascorbate glutathione cycle	AT3G52880
449	ascorbate glutathione cycle	AT3G54660
450	ascorbate glutathione cycle	AT4G08390
451	ascorbate glutathione cycle	AT4G32320
452	ascorbate glutathione cycle	AT4G35000
453	ascorbate glutathione cycle	AT4G35970
454	ascorbate glutathione cycle	AT4G39830
455	ascorbate glutathione cycle	AT5G03630
456	ascorbate glutathione cycle	AT5G08740
457	ascorbate glutathione cycle	AT5G16710
458	ascorbate glutathione cycle	AT5G21100
459	ascorbate glutathione cycle	AT5G21105
461	ascorbate glutathione cycle	AT5G36270
1763	lipases pathway	AT1G52570
1764	lipases pathway	AT1G55180
1765	lipases pathway	AT1G80850
1766	lipases pathway	AT2G06925
1768	lipases pathway	AT2G42010
1769	lipases pathway	AT2G44810
1770	lipases pathway	AT3G05630
1771	lipases pathway	AT3G08510
1772	lipases pathway	AT3G15730
1773	lipases pathway	AT3G16785
1774	lipases pathway	AT3G19120
1775	lipases pathway	AT3G19430
1776	lipases pathway	AT4G00240
1777	lipases pathway	AT4G11830
1778	lipases pathway	AT4G11840
1779	lipases pathway	AT4G11850
1782	lipases pathway	AT4G29780
1783	lipases pathway	AT4G34920
1785	lipases pathway	AT4G35790
1786	lipases pathway	AT4G37070
1787	lipases pathway	AT4G38530
1788	lipases pathway	AT4G38690
1789	lipases pathway	AT5G12010
1790	lipases pathway	AT5G25370
1792	lipases pathway	AT5G58670
1793	lipases pathway	AT5G58690
2096	phenylalanine degradation	AT1G04410
2097	phenylalanine degradation	AT1G06570
2098	phenylalanine degradation	AT1G11840
2099	phenylalanine degradation	AT1G12050
2101	phenylalanine degradation	AT1G53240
2102	phenylalanine degradation	AT1G53310
2103	phenylalanine degradation	AT1G67280
2104	phenylalanine degradation	AT1G68750
2105	phenylalanine degradation	AT2G22250
2106	phenylalanine degradation	AT2G22780
2107	phenylalanine degradation	AT2G24850
2108	phenylalanine degradation	AT2G42600
2110	phenylalanine degradation	AT3G04530
2111	phenylalanine degradation	AT3G14940
2112	phenylalanine degradation	AT3G15020
2113	phenylalanine degradation	AT3G47520
2114	phenylalanine degradation	AT3G61070
2115	phenylalanine degradation	AT4G18440
2116	phenylalanine degradation	AT5G09660
2117	phenylalanine degradation	AT5G36160
2118	phenylalanine degradation	AT5G43330
2119	phenylalanine degradation	AT5G50950
2120	phenylalanine degradation	AT5G53970
2121	phenylalanine degradation	AT5G54080
2122	phenylalanine degradation	AT5G56720
2123	phenylalanine degradation	AT5G58330
609	carbon monoxide dehydrogenase pathway	AT1G23360
610	carbon monoxide dehydrogenase pathway	AT1G26100
611	carbon monoxide dehydrogenase pathway	AT1G45110
613	carbon monoxide dehydrogenase pathway	AT1G50480
614	carbon monoxide dehydrogenase pathway	AT1G69523
615	carbon monoxide dehydrogenase pathway	AT1G69526
616	carbon monoxide dehydrogenase pathway	AT1G78140
617	carbon monoxide dehydrogenase pathway	AT2G22740
618	carbon monoxide dehydrogenase pathway	AT2G41040
620	carbon monoxide dehydrogenase pathway	AT2G43920
621	carbon monoxide dehydrogenase pathway	AT2G43940
622	carbon monoxide dehydrogenase pathway	AT3G01660
623	carbon monoxide dehydrogenase pathway	AT3G06930
624	carbon monoxide dehydrogenase pathway	AT3G12270
625	carbon monoxide dehydrogenase pathway	AT3G14930
627	carbon monoxide dehydrogenase pathway	AT4G25570
628	carbon monoxide dehydrogenase pathway	AT4G25730
629	carbon monoxide dehydrogenase pathway	AT4G31790
630	carbon monoxide dehydrogenase pathway	AT5G01230
631	carbon monoxide dehydrogenase pathway	AT5G10910
632	carbon monoxide dehydrogenase pathway	AT5G14780
633	carbon monoxide dehydrogenase pathway	AT5G17660
634	carbon monoxide dehydrogenase pathway	AT5G24840
635	carbon monoxide dehydrogenase pathway	AT5G37510
636	carbon monoxide dehydrogenase pathway	AT5G38100
637	carbon monoxide dehydrogenase pathway	AT5G38630
638	carbon monoxide dehydrogenase pathway	AT5G49020
639	carbon monoxide dehydrogenase pathway	AT5G49160
2497	sulfate assimilation	AT1G19920
2498	sulfate assimilation	AT1G33320
2499	sulfate assimilation	AT1G55880
2500	sulfate assimilation	AT1G55920
2501	sulfate assimilation	AT1G62180
2502	sulfate assimilation	AT1G64660
2504	sulfate assimilation	AT2G17640
2505	sulfate assimilation	AT2G34970
2506	sulfate assimilation	AT2G43750
2507	sulfate assimilation	AT3G01120
2508	sulfate assimilation	AT3G03630
2509	sulfate assimilation	AT3G03780
2510	sulfate assimilation	AT3G04940
2511	sulfate assimilation	AT3G10050
2512	sulfate assimilation	AT3G13110
2513	sulfate assimilation	AT3G22890
2514	sulfate assimilation	AT3G57050
2515	sulfate assimilation	AT3G59760
2516	sulfate assimilation	AT3G61440
2517	sulfate assimilation	AT4G04610
2518	sulfate assimilation	AT4G14680
2519	sulfate assimilation	AT4G14880
2520	sulfate assimilation	AT4G21990
2521	sulfate assimilation	AT4G23600
2522	sulfate assimilation	AT4G29540
2524	sulfate assimilation	AT5G04590
2526	sulfate assimilation	AT5G20980
2527	sulfate assimilation	AT5G28020
2528	sulfate assimilation	AT5G28030
2529	sulfate assimilation	AT5G38530
2530	sulfate assimilation	AT5G43780
2531	sulfate assimilation	AT5G56760
1970	NAD/NADH phosphorylation and dephosphorylation	AT1G21640
1971	NAD/NADH phosphorylation and dephosphorylation	AT1G47260
1972	NAD/NADH phosphorylation and dephosphorylation	AT1G49140
1974	NAD/NADH phosphorylation and dephosphorylation	AT1G79010
1975	NAD/NADH phosphorylation and dephosphorylation	AT2G02050
1982	NAD/NADH phosphorylation and dephosphorylation	AT2G20360
1983	NAD/NADH phosphorylation and dephosphorylation	AT2G27730
1984	NAD/NADH phosphorylation and dephosphorylation	AT2G31490
1986	NAD/NADH phosphorylation and dephosphorylation	AT2G33220
1987	NAD/NADH phosphorylation and dephosphorylation	AT2G39510
1988	NAD/NADH phosphorylation and dephosphorylation	AT2G42310
1989	NAD/NADH phosphorylation and dephosphorylation	AT2G47690
1990	NAD/NADH phosphorylation and dephosphorylation	AT3G03100
1991	NAD/NADH phosphorylation and dephosphorylation	AT3G06310
1992	NAD/NADH phosphorylation and dephosphorylation	AT3G08610
1993	NAD/NADH phosphorylation and dephosphorylation	AT3G12260
1994	NAD/NADH phosphorylation and dephosphorylation	AT3G21070
1995	NAD/NADH phosphorylation and dephosphorylation	AT3G47930
1996	NAD/NADH phosphorylation and dephosphorylation	AT3G48680
1997	NAD/NADH phosphorylation and dephosphorylation	AT3G57785
1998	NAD/NADH phosphorylation and dephosphorylation	AT4G02580
1999	NAD/NADH phosphorylation and dephosphorylation	AT4G16450
2000	NAD/NADH phosphorylation and dephosphorylation	AT4G20150
2001	NAD/NADH phosphorylation and dephosphorylation	AT5G08530
2002	NAD/NADH phosphorylation and dephosphorylation	AT5G11770
2003	NAD/NADH phosphorylation and dephosphorylation	AT5G18800
2004	NAD/NADH phosphorylation and dephosphorylation	AT5G37510
2005	NAD/NADH phosphorylation and dephosphorylation	AT5G40210
2006	NAD/NADH phosphorylation and dephosphorylation	AT5G52840
2007	NAD/NADH phosphorylation and dephosphorylation	AT5G63510
2008	NAD/NADH phosphorylation and dephosphorylation	AT5G66510
2009	NAD/NADH phosphorylation and dephosphorylation	AT5G67590
2018	NAD/NADH phosphorylation and dephosphorylation	NAD7
2019	NAD/NADH phosphorylation and dephosphorylation	NAD9
2153	photorespiration	AT1G14310
2154	photorespiration	AT1G22020
2155	photorespiration	AT1G23310
2156	photorespiration	AT1G26380
2157	photorespiration	AT1G36370
2158	photorespiration	AT1G56500
2159	photorespiration	AT1G67090
2160	photorespiration	AT1G68010
2161	photorespiration	AT1G70580
2162	photorespiration	AT2G13360
2163	photorespiration	AT2G35120
2164	photorespiration	AT2G35370
2165	photorespiration	AT2G38740
2166	photorespiration	AT2G41250
2167	photorespiration	AT3G10970
2169	photorespiration	AT3G14150
2170	photorespiration	AT3G14415
2171	photorespiration	AT3G48420
2172	photorespiration	AT3G54660
2173	photorespiration	AT4G11570
2174	photorespiration	AT4G13890
2176	photorespiration	AT4G18360
2177	photorespiration	AT4G25840
2178	photorespiration	AT4G32520
2179	photorespiration	AT4G34200
2180	photorespiration	AT4G36400
2181	photorespiration	AT4G37930
2182	photorespiration	AT4G39970
2183	photorespiration	AT5G06580
2184	photorespiration	AT5G26780
2185	photorespiration	AT5G36700
2190	photorespiration	AT5G44400
2191	photorespiration	AT5G44730
2192	photorespiration	AT5G47760
172	de novo biosynthesis of purine nucleotides II	AT1G16350
173	de novo biosynthesis of purine nucleotides II	AT1G20870
175	de novo biosynthesis of purine nucleotides II	AT1G63660
176	de novo biosynthesis of purine nucleotides II	AT1G65010
177	de novo biosynthesis of purine nucleotides II	AT1G66520
178	de novo biosynthesis of purine nucleotides II	AT1G79190
179	de novo biosynthesis of purine nucleotides II	AT1G79470
180	de novo biosynthesis of purine nucleotides II	AT2G04670
185	de novo biosynthesis of purine nucleotides II	AT2G14650
186	de novo biosynthesis of purine nucleotides II	AT2G16570
187	de novo biosynthesis of purine nucleotides II	AT2G20420
188	de novo biosynthesis of purine nucleotides II	AT2G21045
189	de novo biosynthesis of purine nucleotides II	AT2G23970
190	de novo biosynthesis of purine nucleotides II	AT2G28640
191	de novo biosynthesis of purine nucleotides II	AT2G35040
193	de novo biosynthesis of purine nucleotides II	AT2G37690
196	de novo biosynthesis of purine nucleotides II	AT3G14150
197	de novo biosynthesis of purine nucleotides II	AT3G21110
198	de novo biosynthesis of purine nucleotides II	AT3G27740
199	de novo biosynthesis of purine nucleotides II	AT3G55010
200	de novo biosynthesis of purine nucleotides II	AT3G57610
202	de novo biosynthesis of purine nucleotides II	AT4G07830
204	de novo biosynthesis of purine nucleotides II	AT4G17360
205	de novo biosynthesis of purine nucleotides II	AT4G18440
206	de novo biosynthesis of purine nucleotides II	AT4G30530
207	de novo biosynthesis of purine nucleotides II	AT4G30540
208	de novo biosynthesis of purine nucleotides II	AT4G30550
209	de novo biosynthesis of purine nucleotides II	AT4G34740
210	de novo biosynthesis of purine nucleotides II	AT4G34910
211	de novo biosynthesis of purine nucleotides II	AT4G38880
212	de novo biosynthesis of purine nucleotides II	AT5G10240
213	de novo biosynthesis of purine nucleotides II	AT5G10920
216	de novo biosynthesis of purine nucleotides II	AT5G42010
217	de novo biosynthesis of purine nucleotides II	AT5G47435
218	de novo biosynthesis of purine nucleotides II	AT5G50530
220	de novo biosynthesis of purine nucleotides II	AT5G50950
221	de novo biosynthesis of purine nucleotides II	AT5G63490
491	biosynthesis of proto- and siroheme	AT1G03475
493	biosynthesis of proto- and siroheme	AT1G09940
495	biosynthesis of proto- and siroheme	AT1G44318
496	biosynthesis of proto- and siroheme	AT1G58290
497	biosynthesis of proto- and siroheme	AT1G65840
498	biosynthesis of proto- and siroheme	AT1G69740
499	biosynthesis of proto- and siroheme	AT2G05400
500	biosynthesis of proto- and siroheme	AT2G30390
501	biosynthesis of proto- and siroheme	AT2G31250
502	biosynthesis of proto- and siroheme	AT2G38400
503	biosynthesis of proto- and siroheme	AT2G40490
504	biosynthesis of proto- and siroheme	AT2G43020
505	biosynthesis of proto- and siroheme	AT3G08860
506	biosynthesis of proto- and siroheme	AT3G14930
507	biosynthesis of proto- and siroheme	AT3G23810
508	biosynthesis of proto- and siroheme	AT3G48730
509	biosynthesis of proto- and siroheme	AT3G59050
510	biosynthesis of proto- and siroheme	AT4G01690
511	biosynthesis of proto- and siroheme	AT4G03140
512	biosynthesis of proto- and siroheme	AT4G03205
513	biosynthesis of proto- and siroheme	AT4G13940
514	biosynthesis of proto- and siroheme	AT4G16310
515	biosynthesis of proto- and siroheme	AT4G23660
516	biosynthesis of proto- and siroheme	AT4G29720
517	biosynthesis of proto- and siroheme	AT5G08280
518	biosynthesis of proto- and siroheme	AT5G13070
519	biosynthesis of proto- and siroheme	AT5G14220
520	biosynthesis of proto- and siroheme	AT5G19720
521	biosynthesis of proto- and siroheme	AT5G26030
523	biosynthesis of proto- and siroheme	AT5G40850
524	biosynthesis of proto- and siroheme	AT5G46180
525	biosynthesis of proto- and siroheme	AT5G50320
526	biosynthesis of proto- and siroheme	AT5G52810
527	biosynthesis of proto- and siroheme	AT5G57190
528	biosynthesis of proto- and siroheme	AT5G63290
529	biosynthesis of proto- and siroheme	AT5G63570
530	biosynthesis of proto- and siroheme	AT5G64050
566	Calvin cycle	AT1G12800
567	Calvin cycle	AT1G13410
568	Calvin cycle	AT1G18270
569	Calvin cycle	AT1G32060
570	Calvin cycle	AT1G34630
571	Calvin cycle	AT1G43670
572	Calvin cycle	AT1G56190
573	Calvin cycle	AT1G63290
574	Calvin cycle	AT1G67090
575	Calvin cycle	AT1G71100
576	Calvin cycle	AT1G79550
577	Calvin cycle	AT2G01140
578	Calvin cycle	AT2G01290
580	Calvin cycle	AT2G16940
581	Calvin cycle	AT2G21170
582	Calvin cycle	AT2G21330
583	Calvin cycle	AT2G36460
584	Calvin cycle	AT2G45290
585	Calvin cycle	AT3G01850
586	Calvin cycle	AT3G04790
587	Calvin cycle	AT3G04880
588	Calvin cycle	AT3G12780
589	Calvin cycle	AT3G27190
590	Calvin cycle	AT3G27440
591	Calvin cycle	AT3G52930
592	Calvin cycle	AT3G54050
593	Calvin cycle	AT3G55440
594	Calvin cycle	AT3G60750
595	Calvin cycle	AT4G26520
596	Calvin cycle	AT4G26530
597	Calvin cycle	AT4G38970
598	Calvin cycle	AT5G03690
602	Calvin cycle	AT5G40870
603	Calvin cycle	AT5G44520
604	Calvin cycle	AT5G55700
605	Calvin cycle	AT5G58240
606	Calvin cycle	AT5G61410
1722	lignin biosynthesis	AT1G09480
1724	lignin biosynthesis	AT1G09500
1725	lignin biosynthesis	AT1G09510
1726	lignin biosynthesis	AT1G15950
1727	lignin biosynthesis	AT1G20480
1728	lignin biosynthesis	AT1G20490
1729	lignin biosynthesis	AT1G20500
1730	lignin biosynthesis	AT1G20510
1731	lignin biosynthesis	AT1G24735
1732	lignin biosynthesis	AT1G51410
1733	lignin biosynthesis	AT1G51680
1734	lignin biosynthesis	AT1G62940
1735	lignin biosynthesis	AT1G65060
1736	lignin biosynthesis	AT1G67980
1737	lignin biosynthesis	AT1G67990
1738	lignin biosynthesis	AT1G72680
1739	lignin biosynthesis	AT1G76470
1740	lignin biosynthesis	AT1G80820
1741	lignin biosynthesis	AT2G02400
1742	lignin biosynthesis	AT2G23910
1743	lignin biosynthesis	AT2G33590
1744	lignin biosynthesis	AT2G33600
1745	lignin biosynthesis	AT2G40890
1746	lignin biosynthesis	AT3G19450
1747	lignin biosynthesis	AT3G21230
1748	lignin biosynthesis	AT3G21240
1749	lignin biosynthesis	AT4G05160
1750	lignin biosynthesis	AT4G19010
1751	lignin biosynthesis	AT4G26220
1752	lignin biosynthesis	AT4G27250
1753	lignin biosynthesis	AT4G30470
1754	lignin biosynthesis	AT4G34050
1755	lignin biosynthesis	AT4G34230
1756	lignin biosynthesis	AT4G36220
1757	lignin biosynthesis	AT5G14700
1758	lignin biosynthesis	AT5G19440
1759	lignin biosynthesis	AT5G38120
1760	lignin biosynthesis	AT5G54160
1761	lignin biosynthesis	AT5G58490
1762	lignin biosynthesis	AT5G63380
2608	TCA cycle variation I	AT1G04410
2609	TCA cycle variation I	AT1G31180
2611	TCA cycle variation I	AT1G50710
2612	TCA cycle variation I	AT1G53240
2613	TCA cycle variation I	AT1G54340
2614	TCA cycle variation I	AT1G64500
2615	TCA cycle variation I	AT1G65930
2616	TCA cycle variation I	AT1G79750
2617	TCA cycle variation I	AT2G05710
2618	TCA cycle variation I	AT2G17130
2619	TCA cycle variation I	AT2G18760
2620	TCA cycle variation I	AT2G22780
2621	TCA cycle variation I	AT2G42790
2622	TCA cycle variation I	AT2G44350
2624	TCA cycle variation I	AT3G15020
2625	TCA cycle variation I	AT3G15910
2626	TCA cycle variation I	AT3G27380
2627	TCA cycle variation I	AT3G47520
2628	TCA cycle variation I	AT3G58740
2629	TCA cycle variation I	AT3G58750
2630	TCA cycle variation I	AT3G60100
2631	TCA cycle variation I	AT3G61070
2633	TCA cycle variation I	AT4G13430
2634	TCA cycle variation I	AT4G18440
2635	TCA cycle variation I	AT4G19920
2636	TCA cycle variation I	AT4G26970
2637	TCA cycle variation I	AT4G32210
2638	TCA cycle variation I	AT4G35260
2639	TCA cycle variation I	AT4G35650
2640	TCA cycle variation I	AT4G35830
2641	TCA cycle variation I	AT5G01710
2644	TCA cycle variation I	AT5G09660
2646	TCA cycle variation I	AT5G14590
2647	TCA cycle variation I	AT5G24280
2648	TCA cycle variation I	AT5G40650
2649	TCA cycle variation I	AT5G42390
2650	TCA cycle variation I	AT5G43330
2651	TCA cycle variation I	AT5G49680
2652	TCA cycle variation I	AT5G50950
2653	TCA cycle variation I	AT5G56720
2654	TCA cycle variation I	AT5G58330
2656	TCA cycle variation I	AT5G65750
2657	TCA cycle variation I	AT5G65820
651	cellulose biosynthesis	AT1G02730
652	cellulose biosynthesis	AT1G02800
653	cellulose biosynthesis	AT1G23480
654	cellulose biosynthesis	AT1G24070
655	cellulose biosynthesis	AT1G32180
656	cellulose biosynthesis	AT1G55850
657	cellulose biosynthesis	AT1G70710
658	cellulose biosynthesis	AT2G21770
659	cellulose biosynthesis	AT2G24630
660	cellulose biosynthesis	AT2G25540
662	cellulose biosynthesis	AT2G32540
663	cellulose biosynthesis	AT2G32610
664	cellulose biosynthesis	AT2G32620
665	cellulose biosynthesis	AT2G33100
666	cellulose biosynthesis	AT2G35650
667	cellulose biosynthesis	AT3G02230
668	cellulose biosynthesis	AT3G03050
669	cellulose biosynthesis	AT3G07330
670	cellulose biosynthesis	AT3G28180
671	cellulose biosynthesis	AT3G56000
672	cellulose biosynthesis	AT3G57240
673	cellulose biosynthesis	AT4G07960
674	cellulose biosynthesis	AT4G13410
675	cellulose biosynthesis	AT4G15290
676	cellulose biosynthesis	AT4G15320
677	cellulose biosynthesis	AT4G16590
678	cellulose biosynthesis	AT4G18780
679	cellulose biosynthesis	AT4G23990
680	cellulose biosynthesis	AT4G24000
681	cellulose biosynthesis	AT4G24010
682	cellulose biosynthesis	AT4G31590
683	cellulose biosynthesis	AT4G32410
684	cellulose biosynthesis	AT4G38190
685	cellulose biosynthesis	AT4G39350
686	cellulose biosynthesis	AT5G03760
687	cellulose biosynthesis	AT5G05170
688	cellulose biosynthesis	AT5G09870
689	cellulose biosynthesis	AT5G16190
690	cellulose biosynthesis	AT5G16910
691	cellulose biosynthesis	AT5G17420
692	cellulose biosynthesis	AT5G22740
693	cellulose biosynthesis	AT5G44030
694	cellulose biosynthesis	AT5G49720
695	cellulose biosynthesis	AT5G64740
2911	UDP-glucose conversion	AT1G01050
2912	UDP-glucose conversion	AT1G02000
2913	UDP-glucose conversion	AT1G09340
2914	UDP-glucose conversion	AT1G12780
2915	UDP-glucose conversion	AT1G17890
2916	UDP-glucose conversion	AT1G47290
2917	UDP-glucose conversion	AT1G63180
2918	UDP-glucose conversion	AT1G66800
2919	UDP-glucose conversion	AT1G74910
2920	UDP-glucose conversion	AT1G78570
2921	UDP-glucose conversion	AT2G02400
2922	UDP-glucose conversion	AT2G04650
2923	UDP-glucose conversion	AT2G18230
2924	UDP-glucose conversion	AT2G26260
2925	UDP-glucose conversion	AT2G28760
2926	UDP-glucose conversion	AT2G33590
2927	UDP-glucose conversion	AT2G33600
2928	UDP-glucose conversion	AT2G33630
2929	UDP-glucose conversion	AT2G34850
2930	UDP-glucose conversion	AT2G43420
2931	UDP-glucose conversion	AT2G45310
2932	UDP-glucose conversion	AT2G46860
2933	UDP-glucose conversion	AT3G03250
2934	UDP-glucose conversion	AT3G23820
2935	UDP-glucose conversion	AT3G53620
2936	UDP-glucose conversion	AT3G63140
2937	UDP-glucose conversion	AT4G00110
2938	UDP-glucose conversion	AT4G00560
2939	UDP-glucose conversion	AT4G01480
2940	UDP-glucose conversion	AT4G10960
2941	UDP-glucose conversion	AT4G12250
2942	UDP-glucose conversion	AT4G20460
2943	UDP-glucose conversion	AT4G23920
2944	UDP-glucose conversion	AT4G30440
2945	UDP-glucose conversion	AT4G30570
2946	UDP-glucose conversion	AT4G33360
2947	UDP-glucose conversion	AT4G35250
2948	UDP-glucose conversion	AT5G09650
2949	UDP-glucose conversion	AT5G10730
2950	UDP-glucose conversion	AT5G17310
2951	UDP-glucose conversion	AT5G19220
2952	UDP-glucose conversion	AT5G44480
2953	UDP-glucose conversion	AT5G58490
2954	UDP-glucose conversion	AT5G66280
2823	tRNA charging pathway	AT1G09620
2824	tRNA charging pathway	AT1G11870
2825	tRNA charging pathway	AT1G14610
2826	tRNA charging pathway	AT1G17960
2827	tRNA charging pathway	AT1G24460
2828	tRNA charging pathway	AT1G25350
2829	tRNA charging pathway	AT1G27595
2831	tRNA charging pathway	AT1G29870
2832	tRNA charging pathway	AT1G29880
2835	tRNA charging pathway	AT1G50200
2836	tRNA charging pathway	AT1G66530
2837	tRNA charging pathway	AT1G70980
2838	tRNA charging pathway	AT1G72550
2839	tRNA charging pathway	AT3G02660
2840	tRNA charging pathway	AT3G02760
2841	tRNA charging pathway	AT3G04600
2842	tRNA charging pathway	AT3G07420
2843	tRNA charging pathway	AT3G11710
2844	tRNA charging pathway	AT3G13490
2846	tRNA charging pathway	AT3G44740
2847	tRNA charging pathway	AT3G46100
2848	tRNA charging pathway	AT3G48110
2849	tRNA charging pathway	AT3G55400
2850	tRNA charging pathway	AT3G56300
2851	tRNA charging pathway	AT3G58140
2852	tRNA charging pathway	AT3G59410
2853	tRNA charging pathway	AT3G59980
2855	tRNA charging pathway	AT3G62120
2856	tRNA charging pathway	AT4G04350
2859	tRNA charging pathway	AT4G10320
2860	tRNA charging pathway	AT4G13780
2861	tRNA charging pathway	AT4G17300
2862	tRNA charging pathway	AT4G26300
2863	tRNA charging pathway	AT4G26870
2864	tRNA charging pathway	AT4G31180
2865	tRNA charging pathway	AT4G33760
2866	tRNA charging pathway	AT5G16715
2867	tRNA charging pathway	AT5G19720
2870	tRNA charging pathway	AT5G26830
2871	tRNA charging pathway	AT5G27470
2872	tRNA charging pathway	AT5G28430
2873	tRNA charging pathway	AT5G38830
2874	tRNA charging pathway	AT5G39220
2875	tRNA charging pathway	AT5G49030
2876	tRNA charging pathway	AT5G52520
2878	tRNA charging pathway	AT5G64050
2551	TCA cycle -- aerobic respiration	AT1G04410
2552	TCA cycle -- aerobic respiration	AT1G08480
2553	TCA cycle -- aerobic respiration	AT1G31180
2555	TCA cycle -- aerobic respiration	AT1G47420
2556	TCA cycle -- aerobic respiration	AT1G50710
2557	TCA cycle -- aerobic respiration	AT1G53240
2558	TCA cycle -- aerobic respiration	AT1G54340
2559	TCA cycle -- aerobic respiration	AT1G64500
2560	TCA cycle -- aerobic respiration	AT1G65930
2561	TCA cycle -- aerobic respiration	AT2G05710
2562	TCA cycle -- aerobic respiration	AT2G17130
2563	TCA cycle -- aerobic respiration	AT2G18450
2564	TCA cycle -- aerobic respiration	AT2G18760
2565	TCA cycle -- aerobic respiration	AT2G22780
2566	TCA cycle -- aerobic respiration	AT2G42790
2567	TCA cycle -- aerobic respiration	AT2G44350
2568	TCA cycle -- aerobic respiration	AT2G46390
2569	TCA cycle -- aerobic respiration	AT2G46505
2571	TCA cycle -- aerobic respiration	AT3G15020
2572	TCA cycle -- aerobic respiration	AT3G15910
2573	TCA cycle -- aerobic respiration	AT3G27380
2574	TCA cycle -- aerobic respiration	AT3G47520
2575	TCA cycle -- aerobic respiration	AT3G47833
2576	TCA cycle -- aerobic respiration	AT3G58740
2577	TCA cycle -- aerobic respiration	AT3G58750
2578	TCA cycle -- aerobic respiration	AT3G60100
2579	TCA cycle -- aerobic respiration	AT3G61070
2581	TCA cycle -- aerobic respiration	AT4G13430
2582	TCA cycle -- aerobic respiration	AT4G18440
2583	TCA cycle -- aerobic respiration	AT4G19920
2584	TCA cycle -- aerobic respiration	AT4G26970
2585	TCA cycle -- aerobic respiration	AT4G32210
2586	TCA cycle -- aerobic respiration	AT4G35260
2587	TCA cycle -- aerobic respiration	AT4G35650
2588	TCA cycle -- aerobic respiration	AT4G35830
2589	TCA cycle -- aerobic respiration	AT5G01710
2592	TCA cycle -- aerobic respiration	AT5G09660
2594	TCA cycle -- aerobic respiration	AT5G14590
2595	TCA cycle -- aerobic respiration	AT5G24280
2596	TCA cycle -- aerobic respiration	AT5G40650
2597	TCA cycle -- aerobic respiration	AT5G42390
2598	TCA cycle -- aerobic respiration	AT5G43330
2599	TCA cycle -- aerobic respiration	AT5G49680
2600	TCA cycle -- aerobic respiration	AT5G50950
2601	TCA cycle -- aerobic respiration	AT5G56720
2602	TCA cycle -- aerobic respiration	AT5G58330
2603	TCA cycle -- aerobic respiration	AT5G62575
2605	TCA cycle -- aerobic respiration	AT5G65750
2606	TCA cycle -- aerobic respiration	AT5G65820
2607	TCA cycle -- aerobic respiration	AT5G66760
2756	triacylglycerol degradation	AT1G02660
2757	triacylglycerol degradation	AT1G05790
2758	triacylglycerol degradation	AT1G05800
2759	triacylglycerol degradation	AT1G06250
2760	triacylglycerol degradation	AT1G06800
2761	triacylglycerol degradation	AT1G10740
2762	triacylglycerol degradation	AT1G18460
2763	triacylglycerol degradation	AT1G20120
2764	triacylglycerol degradation	AT1G23240
2766	triacylglycerol degradation	AT1G28570
2767	triacylglycerol degradation	AT1G28580
2768	triacylglycerol degradation	AT1G28610
2769	triacylglycerol degradation	AT1G28640
2770	triacylglycerol degradation	AT1G30370
2771	triacylglycerol degradation	AT1G31550
2773	triacylglycerol degradation	AT1G51440
2774	triacylglycerol degradation	AT1G53990
2778	triacylglycerol degradation	AT1G73920
2779	triacylglycerol degradation	AT2G05260
2780	triacylglycerol degradation	AT2G17630
2781	triacylglycerol degradation	AT2G30550
2782	triacylglycerol degradation	AT2G31100
2783	triacylglycerol degradation	AT2G31690
2784	triacylglycerol degradation	AT2G42450
2785	triacylglycerol degradation	AT2G42690
2786	triacylglycerol degradation	AT3G07400
2787	triacylglycerol degradation	AT3G10890
2788	triacylglycerol degradation	AT3G14075
2789	triacylglycerol degradation	AT3G14360
2790	triacylglycerol degradation	AT3G43550
2792	triacylglycerol degradation	AT3G48080
2793	triacylglycerol degradation	AT3G48090
2794	triacylglycerol degradation	AT3G52430
2795	triacylglycerol degradation	AT3G55190
2797	triacylglycerol degradation	AT3G62590
2799	triacylglycerol degradation	AT4G10955
2800	triacylglycerol degradation	AT4G13550
2802	triacylglycerol degradation	AT4G16820
[truncated: 487 more rows]
