# Supplementary material for: A Role for Gene Duplication and Natural Variation of Gene Expression in the Evolution of Metabolism
Source: PLoS One. 2008 Mar 19;3(3):e1838. doi: 10.1371/journal.pone.0001838 (PMC2263126; doi:10.1371/journal.pone.0001838)
Supplement: Table S4 — Duplication bias within metabolic pathways. The distribution of gene duplications within the pathways is presented. Genes (N) lists the number of genes within a pathway while Observed gives the number of these genes that are classified as segmental duplicates or tandem duplicates. The genomic frequency of segmental duplicates and tandem duplicates were used to predict the expected frequency of duplications for a given N. The fit of goodness between the observed and expected values were tested via χ2 and only P values significant at an FDR of 0.05 are presented as significant. This was done for both segmental duplicate and tandem duplicates. (0.04 MB XLS) [file pone.0001838.s004.xls]

## Sheet: Gene Duplication Bias
Supplemental Table 4. Duplication bias within biosynthetic pathways.
		Observed			Expected			FDR Tested P Value
Pathway	Genes (N)	Duplicate	Tandem Duplicate		Duplicate	Tandem Duplicate		Duplicate	Tandem Duplicate
cellulose biosynthesis	45	42	9		18	5		5.60064e-13	NS
Glucosinolate Breakdown	19	19	13		8	2		1.3153e-07	5.2698e-17
Aliphatic Glucosinolate	24	22	11		10	2		3.41357e-07	8.20967e-09
lignin biosynthesis	41	31	13		17	4		4.86133e-06	5.45599e-06
sucrose biosynthesis	20	18	0		8	2		6.70084e-06	NS
ethylene biosynthesis from methionine	27	22	2		11	3		1.48768e-05	NS
methionine salvage pathway	27	22	2		11	3		1.48768e-05	NS
leucine biosynthesis	15	14	0		6	2		3.14618e-05	NS
UDP-glucose conversion	44	31	2		18	4		5.3791e-05	NS
UDP-D-xylose biosynthesis	11	11	0		5	1		5.94538e-05	NS
trehalose biosynthesis	22	18	2		9	2		8.10804e-05	NS
galactose degradation I	58	38	2		24	6		0.000108433	NS
glycolysis I	70	44	2		29	7		0.000145129	NS
salvage pathways of purine nucleosides	21	17	3		9	2		0.000163401	NS
tRNA charging pathway	56	9	0		23	6		0.000189734	NS
galactose degradation II	58	37	2		24	6		0.000313983	NS
triacylglycerol degradation	67	41	23		27	7		NS	7.00831e-11
SAM cycle	8	8	0		3	1		NS	NS
purine degradation	11	10	4		5	1		NS	NS
GDP-D-rhamnose biosynthesis	16	13	0		7	2		NS	NS
GDP-L-fucose biosynthesis I (from GDP-D-mannose)	13	11	0		5	1		NS	NS
Camalexin	7	7	3		3	1		NS	NS
mannitol degradation	7	7	2		3	1		NS	NS
jasmonic acid biosynthesis	20	15	7		8	2		NS	0.000250524
lipases pathway	31	21	8		13	3		NS	NS
salicylic acid biosynthesis	6	6	0		2	1		NS	NS
sucrose degradation	21	15	0		9	2		NS	NS
starch degradation	16	1	0		7	2		NS	NS
suberin biosynthesis	18	13	5		7	2		NS	NS
IAA biosynthesis I	8	7	3		3	1		NS	NS
fatty acid elongation -- saturated	20	14	1		8	2		NS	NS
lipoxygenase pathway	13	10	3		5	1		NS	NS
formylTHF biosynthesis I	24	16	2		10	2		NS	NS
formylTHF biosynthesis	24	16	2		10	2		NS	NS
phenylalanine degradation	28	18	0		11	3		NS	NS
fatty acid beta-oxidation	17	12	0		7	2		NS	NS
photorespiration	40	24	12		16	4		NS	3.56475e-05
lysine biosynthesis	19	13	0		8	2		NS	NS
glyoxylate cycle	21	14	2		9	2		NS	NS
UDP-N-acetyl-D-glucosamine biosynthesis	7	6	0		3	1		NS	NS
polyamine biosynthesis II	7	6	2		3	1		NS	NS
polyamine biosynthesis I	12	9	2		5	1		NS	NS
gluconeogenesis	63	35	2		26	6		NS	NS
TCA cycle -- aerobic respiration	57	32	2		23	6		NS	NS
ureide biosynthesis	14	10	4		6	1		NS	NS
choline biosynthesis III	16	11	3		7	2		NS	NS
Indolic Glucsoinolate	9	7	4		4	1		NS	NS
TCA cycle variation I	50	28	2		21	5		NS	NS
vitamin E biosynthesis	7	0	0		3	1		NS	NS
isoleucine degradation	11	8	0		5	1		NS	NS
methionine degradation I	11	8	2		5	1		NS	NS
cytokinins degradation	6	5	0		2	1		NS	NS
NAD biosynthesis I (from aspartate)	6	0	0		2	1		NS	NS
oxidative branch of the pentose phosphate pathway	19	12	4		8	2		NS	NS
polyisoprenoid biosynthesis	14	2	2		6	1		NS	NS
spermine biosynthesis I	8	6	2		3	1		NS	NS
carbon monoxide dehydrogenase pathway	33	8	3		14	3		NS	NS
deoxyribose phosphate degradation	10	7	5		4	1		NS	3.24021e-05
ammonia assimilation cycle	10	7	0		4	1		NS	NS
nitrate assimilation pathway	10	7	0		4	1		NS	NS
glycine biosynthesis	10	7	2		4	1		NS	NS
Calvin cycle	42	23	5		17	4		NS	NS
ureide degradation	5	0	0		2	1		NS	NS
tyrosine biosynthesis II	5	0	0		2	1		NS	NS
phenylalanine biosynthesis II	22	13	1		9	2		NS	NS
fatty acid biosynthesis - initial steps	12	2	0		5	1		NS	NS
asparagine biosynthesis	7	5	0		3	1		NS	NS
glutamine biosynthesis	7	5	0		3	1		NS	NS
phospholipid biosynthesis	23	13	0		9	2		NS	NS
sterol biosynthesis	21	12	6		9	2		NS	NS
arginine biosynthesis II (acetyl cycle)	14	3	0		6	1		NS	NS
de novo biosynthesis of pyrimidine ribonucleotides	28	15	2		11	3		NS	NS
ascorbate glutathione cycle	28	15	2		11	3		NS	NS
dTDP-L-rhamnose biosynthesis	24	13	0		10	2		NS	NS
histidine biosynthesis	22	12	2		9	2		NS	NS
chlorophyllide a biosynthesis	57	28	3		23	6		NS	NS
sulfate assimilation	35	18	3		14	4		NS	NS
aspartate biosynthesis and degradation	6	4	0		2	1		NS	NS
arginine biosynthesis	13	3	0		5	1		NS	NS
Flavonol	16	9	5		7	2		NS	NS
ent-kaurene biosynthesis	16	9	3		7	2		NS	NS
valine degradation	16	9	0		7	2		NS	NS
glutamate degradation II	8	5	0		3	1		NS	NS
homoserine biosynthesis	8	5	0		3	1		NS	NS
Tryptophan	14	8	0		6	1		NS	NS
polyamine biosynthesis III	12	7	0		5	1		NS	NS
photosynthesis, light reaction	9	2	0		4	1		NS	NS
dolichyl-diphosphooligosaccharide biosynthesis	9	2	0		4	1		NS	NS
mevalonate pathway	21	6	0		9	2		NS	NS
threonine degradation	21	6	0		9	2		NS	NS
tetrahydrofolate biosynthesis I	18	5	0		7	2		NS	NS
methionine biosynthesis	15	8	1		6	2		NS	NS
de novo biosynthesis of purine nucleotides I	69	32	7		28	7		NS	NS
gibberellin biosynthesis III (early C-13 hydroxylation)	11	6	1		5	1		NS	NS
tetrahydrofolate biosynthesis II	17	5	0		7	2		NS	NS
chorismate biosynthesis	17	5	0		7	2		NS	NS
glycine degradation	9	5	0		4	1		NS	NS
pantothenate biosynthesis	9	5	0		4	1		NS	NS
cyanate degradation	14	4	0		6	1		NS	NS
abscisic acid biosynthesis	5	3	0		2	1		NS	NS
triacylglycerol biosynthesis	5	3	0		2	1		NS	NS
gibberellin inactivation	5	3	0		2	1		NS	NS
NAD/NADH phosphorylation and dephosphorylation	44	15	0		18	4		NS	NS
de novo biosynthesis of purine nucleotides II	50	23	7		21	5		NS	NS
aerobic respiration	95	35	2		39	10		NS	NS
ribose degradation	12	6	0		5	1		NS	NS
arginine biosynthesis III	7	2	0		3	1		NS	NS
brassinosteroid biosynthesis II	7	2	0		3	1		NS	NS
carotenoid biosynthesis	7	2	0		3	1		NS	NS
riboflavin and FMN and FAD biosynthesis	7	2	0		3	1		NS	NS
ascorbate biosynthesis	10	5	0		4	1		NS	NS
gibberellin biosynthesis I (non C-3, non C-13 hydroxylation)	10	5	0		4	1		NS	NS
trans-zeatin biosynthesis	8	4	0		3	1		NS	NS
biosynthesis of proto- and siroheme	41	15	0		17	4		NS	NS
thiamin biosynthesis	6	3	0		2	1		NS	NS
isoleucine biosynthesis	17	6	2		7	2		NS	NS
valine biosynthesis	17	6	2		7	2		NS	NS
tyrosine degradation	9	3	0		4	1		NS	NS
glyceraldehyde 3-phosphate degradation	27	12	0		11	3		NS	NS
non-oxidative branch of the pentose phosphate pathway	13	6	0		5	1		NS	NS
methylglyoxal degradation	14	5	0		6	1		NS	NS
arginine degradation I	11	5	0		5	1		NS	NS
cysteine biosynthesis	19	7	2		8	2		NS	NS
homocysteine and cysteine interconversion	11	4	3		5	1		NS	NS
menaquinone biosynthesis	11	4	0		5	1		NS	NS
de novo biosynthesis of pyrimidine deoxyribonucleotides	16	7	0		7	2		NS	NS
superpathway of gluconate degradation	16	7	2		7	2		NS	NS
threonine biosynthesis from homoserine	9	4	1		4	1		NS	NS
leucine degradation	8	3	0		3	1		NS	NS
brassinosteroid biosynthesis I	8	3	0		3	1		NS	NS
biotin biosynthesis II	14	6	0		6	1		NS	NS
starch biosynthesis	19	8	0		8	2		NS	NS
isopentenyl diphosphate biosynthesis -- mevalonate-independent	7	3	0		3	1		NS	NS
serine biosynthesis	7	3	0		3	1		NS	NS
glycolipid biosynthesis	5	2	0		2	1		NS	NS
